# Supplementary material for: Modular access to functionalized 5–8–5 fused ring systems via a photoinduced cycloisomerization reaction
Source: PubMed Central journal article supplement (PMC6009507; doi:10.1039/c8sc00999f), 2018-05-25

# Modular access to functionalized 5-8-5 fused ring systems via a photoinduced cycloisomerization reaction

Anna E. Salvati, James A. Law, Josue Liriano, and James H. Frederick\*

## Supporting Information

### Table of Contents

|                                                                                 |          |
|---------------------------------------------------------------------------------|----------|
| 1. Materials and Methods                                                        | S1       |
| 2. Experimental Procedures and Characterization Data                            | S2–S13   |
| Scheme S1. Synthesis of 5-furylalkynes <b>S5</b> and <b>S6</b>                  | S3       |
| Scheme S2. Preparation of photosubstrate <b>12i</b>                             | S7       |
| Preparation of <i>N-tert</i> -butylbenzenesulfinimidoyl chloride                | S13      |
| 3. <sup>1</sup> H NMR Experiment: Photoequilibration of ( <i>E</i> )- <b>4</b>  | S14      |
| 4. <sup>1</sup> H NMR Experiment: Photoreaction of ( <i>Z</i> )- <b>4</b>       | S15      |
| 5. <sup>1</sup> H NMR Experiment: Photodecomposition of <b>5</b>                | S16      |
| 6. <sup>1</sup> H NMR Experiment: Thermal isomerization of <b>5</b> to <b>3</b> | S17      |
| 7. <sup>1</sup> H NMR Experiment: NMR yields reported in Figure 1               | S18–S21  |
| 8. Photochemical reaction setup and analysis of quartz vs. pyrex glassware      | S22–S23  |
| 9. SI References                                                                | S23–S24  |
| 10. Copies of <sup>1</sup> H and <sup>13</sup> C NMR Spectra                    | S25–S108 |

---

## 1. Materials and Methods

Unless otherwise stated, reactions were conducted in oven-dried glassware under an atmosphere of molecular nitrogen (N<sub>2</sub>) using anhydrous solvents. Tetrahydrofuran (THF), acetonitrile (MeCN), dichloromethane (CH<sub>2</sub>Cl<sub>2</sub>), diethyl ether (Et<sub>2</sub>O), toluene, benzene, and triethylamine (Et<sub>3</sub>N) were dried by passage through activated alumina using a solvent purification system. *n*-Butanol was distilled from CaH<sub>2</sub> prior to use. TMSCl was distilled directly before use. *N-tert*-butylbenzenesulfinimidoyl chloride was prepared by a modification of a reported procedure<sup>1</sup> and used as a 2 M solution in benzene (see, pg. S13). All other commercial reagents were used as received.

Usually one representative reaction and yield of the product is described in detail; isolated yields reported in Table 1 and Table 2 are the average yields obtained from duplicate experiments. Photochemical reactions were performed using a Rayonet RPR-100 photoreactor equipped with 24 W UV-lamps centered at 350 nm. Reaction temperatures were controlled using a temperature modulator. Column chromatography was conducted on silica gel 60 (240-400 mesh) purchased from VWR. Thin layer chromatography (TLC) was performed using pre-coated, glass-backed plates (SiO<sub>2</sub>, 60 PF254, 0.25 mm) and visualized by exposure to UV light (254 nm) or by anisaldehyde, ceric ammonium molybdate, and potassium permanganate staining.

<sup>1</sup>H NMR spectra were recorded at 400 MHz or 600 MHz and are reported relative to deuterated solvent signals. Data for <sup>1</sup>H NMR spectra are reported as follows: chemical shift ( $\delta$  ppm), multiplicity, coupling constant (Hz), and integration. Splitting patterns are abbreviated as follows: singlet (s), doublet (d), triplet (t), quartet (q), quintet (quint), multiplet (m), broad (br), apparent (app), and combinations thereof. <sup>13</sup>C NMR spectra were recorded at 100 or 150 MHz. Data for <sup>13</sup>C NMR spectra are reported in order of carbon multiplicity (C = quaternary, CH = methine, CH<sub>2</sub> = methylene, CH<sub>3</sub> = methyl) and chemical shift. Carbon multiplicity was established by DEPT135 and/or HMQC experiments. Reported melting points of solids are uncorrected. IR spectra were recorded on an FT-IR spectrometer and are reported in terms of frequency (cm<sup>-1</sup>). Mass spectra were collected on an LCT spectrometer utilizing either electrospray (ESI) or direct analysis in real time (DART) ionization techniques.

## 1. Experimental Procedures and Characterization Data

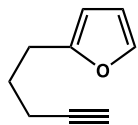

**8:** C<sub>9</sub>H<sub>10</sub>O  
MW: 134.18

**Large-scale preparation of 5-furylalkyne 8.** A two-neck flask equipped with an addition funnel was charged with freshly distilled furan (57 mL, 0.78 mol) and THF (400 mL). The colorless solution was cooled to 0 °C and aged for 1 h. A solution *n*-BuLi in THF (266 mL, 520 mmol, 1.95 M) was then added drop wise via addition funnel over 45 min (**caution: pyrophoric reagent**). After addition, the reaction mixture was maintained at 0 °C during which time a precipitate formed. After 4 h, the resulting slurry was treated with freshly distilled 5-iodopentyne (**7**, 38.8 g, 200 mmol) and the resulting solution was allowed to warm to rt over 12 h. The reaction mixture was cooled to 0 °C and saturated aq. NH<sub>4</sub>Cl (200 mL, **caution: exothermic**) was added slowly over 1 h. The resulting emulsion was transferred to a separatory funnel and extracted with Et<sub>2</sub>O (3 x 500 mL). The combined organic extracts were washed with brine (1 L), dried over MgSO<sub>4</sub>, filtered, and concentrated under reduced pressure.<sup>2</sup> The resulting crude oil was purified by distillation (bp = 68–73 °C; 13 torr) to afford **8** (24.6 g, 182 mmol, 91% yield) as a colorless oil: **<sup>1</sup>H NMR** (400 MHz, CDCl<sub>3</sub>) δ 7.31 (d, *J* = 1.8, 1H), 6.28 (dd, *J* = 3.1, 1.9, 1H), 6.02 (d, *J* = 3.2, 1H), 2.76 (t, *J* = 7.4, 2H), 2.23 (td, *J* = 7.1, 2.7, 2H), 1.98 (t, *J* = 2.6, 1H), 1.87 (quint, *J* = 7.4, 2H). All other characterization data was identical to previously reported values.<sup>3</sup>

**Preparation of 5-furylalkynes S1–S4. General Procedure.** A solution of freshly purified furan derivative (3.9 equiv) and THF (2 mL/mmol of furan) was cooled to –78 °C. A solution of *n*-BuLi in THF (2.6 equiv) was added drop wise via syringe. After addition, the mixture was warmed to 0 °C and maintained for 4 h. Freshly distilled 5-iodoalkyne (1.0 equiv) was added via syringe at 0 °C and the resulting solution was allowed to warm to rt over 12 h. The reaction was quenched by slow addition of NH<sub>4</sub>Cl (**caution: exothermic**). The resulting emulsion was transferred to a separatory funnel and extracted with Et<sub>2</sub>O (3 x 2 mL/mmol furan). The combined organic extracts were washed with an equal volume of brine, dried over MgSO<sub>4</sub>, filtered, and concentrated under reduced pressure. The crude products were purified by distillation or flash chromatography on SiO<sub>2</sub>.

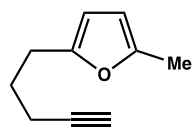

**S1:** C<sub>10</sub>H<sub>12</sub>O  
MW: 148.21

**2-methyl-5-(pent-4-yn-1-yl)furan (S1):** Following the general procedure, the title compound was synthesized from 2-methylfuran (4.1 mL, 45 mmol) and 5-iodopentyne (3.9 g, 20 mmol). Purification by distillation (bp = 56 °C; 4.7 torr) afforded **S1** (2.5 g, 17 mmol, 85% yield) as a colorless oil: **<sup>1</sup>H NMR** (400 MHz, CDCl<sub>3</sub>) δ 5.88 (d, *J* = 2.8, 1H), 5.84 (d, *J* = 2.9, 1H), 2.25 (s, 3H), 2.23 (td, *J* = 7.0, 2.7, 2H), 1.97 (t, *J* = 2.7, 1H), 1.87 (quint, *J* = 7.4, 2H). All other characterization data was identical to previously reported values.<sup>3</sup>

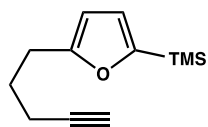

**S2:** C<sub>12</sub>H<sub>18</sub>OSi  
MW: 206.36

**trimethyl(5-(pent-4-yn-1-yl)furan-2-yl)silane (S2):** Following the general procedure, the title compound was synthesized from furan-2-yltrimethylsilane (3.16 g, 22.5 mmol) and 5-iodopentyne (1.94 g, 10.0 mmol). Purification by flash chromatography (SiO<sub>2</sub>; hexanes) afforded **S2** (1.43 g, 6.92 mmol, 69% yield) as a yellow oil: **<sup>1</sup>H NMR** (400 MHz, CDCl<sub>3</sub>) δ 6.52 (d, *J* = 3.1, 1H), 6.00 (d, *J* = 3.1, 1H), 2.78 (t, *J* = 7.5, 2H), 2.25 (td, *J* = 7.1, 2.6, 2H), 1.98 (t, *J* = 2.7, 1H), 1.88 (quint, *J* = 7.2, 2H), 0.24 (s, 9H); **<sup>13</sup>C NMR** (100 MHz, CDCl<sub>3</sub>) δ C: 159.5,

158.6, 83.9; **CH**: 120.4, 105.3, 68.7; **CH<sub>2</sub>**: 27.2, 27.0, 18.0; **CH<sub>3</sub>**: 1.5; **IR** (thin film): 2120 cm<sup>-1</sup>; **HRMS-DART** (m/z) [M+H]<sup>+</sup> calculated for C<sub>12</sub>H<sub>19</sub>OSi = 207.1200; found 207.1203.

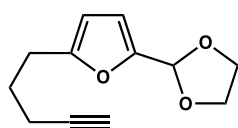

**S3:** C<sub>12</sub>H<sub>14</sub>O<sub>3</sub>  
MW: 206.24

**2-(5-(pent-4-yn-1-yl)furan-2-yl)-1,3-dioxolane (S3):** Following the general procedure, the title compound was synthesized from 2-(furan-2-yl)-1,3-dioxolane (3.15 g, 22.5 mmol) and 5-iodopentyne (1.94 g, 10.0 mmol). Purification by flash chromatography (SiO<sub>2</sub>; hexanes) afforded **S3** (1.5 g, 7.3 mmol, 73% yield) as a yellow oil: **<sup>1</sup>H NMR** (400 MHz, CDCl<sub>3</sub>) δ 6.34 (d, *J* = 3.2, 1H), 5.99 (d, *J* = 3.2, 1H), 5.86 (s, 1H), 4.09–4.17 (m, 2H), 3.96–4.04 (m, 2H), 2.75 (t, *J* = 7.5, 2H), 2.24 (td, *J* = 7.0, 2.6, 2H), 1.97 (t, *J* = 2.6, 1H), 1.87 (quint, *J* = 7.2, 2H); **<sup>13</sup>C NMR** (100 MHz, CDCl<sub>3</sub>) δ C: 156.1, 149.2, 83.7; **CH**: 109.6, 105.9, 97.8, 68.9; **CH<sub>2</sub>**: 65.1, 26.9, 26.7, 17.9; **IR** (thin film): 2117 cm<sup>-1</sup>; **HRMS-ESI** (m/z) [M+H]<sup>+</sup> calculated for C<sub>12</sub>H<sub>15</sub>O<sub>3</sub> = 207.1016; found 207.1025.

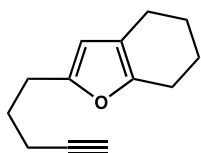

**S4:** C<sub>13</sub>H<sub>16</sub>O  
MW: 188.27

**2-(pent-4-yn-1-yl)-4,5,6,7-tetrahydrobenzofuran (S4):** Following the general procedure, the title compound was prepared from 4,5,6,7-tetrahydrobenzofuran<sup>4</sup> (2.184 g, 17.9 mmol) and 5-iodopentyne (1.577 g, 8.13 mmol). Purification by flash chromatography (SiO<sub>2</sub>; hexanes) afforded **S4** (1.11 g, 5.90 mmol, 73% yield) as a yellow oil: **<sup>1</sup>H NMR** (400 MHz, CDCl<sub>3</sub>) δ 5.82 (s, 1H), 2.68 (t, *J* = 7.4, 2H), 2.54 (t, *J* = 5.9, 2H), 2.36 (t, *J* = 6.0, 2H), 2.24 (td, *J* = 7.0, 2.5, 2H), 1.97 (t, *J* = 2.6, 1H), 1.86–1.76 (m, 4H), 1.71–1.68 (m, 2H); **<sup>13</sup>C NMR** (100 MHz, CDCl<sub>3</sub>) δ **C**: 152.7, 149.0, 117.2, 84.0; **CH**: 106.2, 68.7; **CH<sub>2</sub>**: 27.1, 27.0, 23.2, 23.2, 23.1, 22.1, 17.9;

**IR** (thin film): 2118 cm<sup>-1</sup>; **HRMS-DART** (*m/z*) [M+H]<sup>+</sup> calculated for C<sub>13</sub>H<sub>16</sub>O 188.27; found 189.1278.

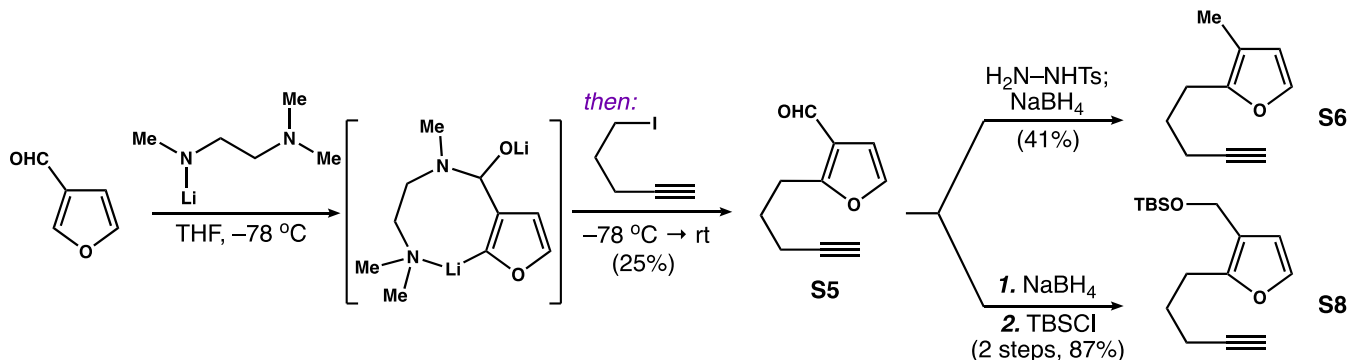

**Scheme S1.** Synthesis of 5-furylalkynes **S6** and **S8**.

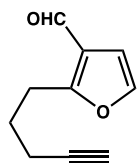

**S5:** C<sub>10</sub>H<sub>10</sub>O<sub>2</sub>  
MW: 162.19

**2-(pent-4-yn-1-yl)furan-3-carbaldehyde (S5):** Following a modification of the procedure reported by Comins,<sup>5</sup> a solution of *N,N,N*-trimethylethylenediamine (4.4 mL, 34 mmol) in THF (110 mL) was treated with a solution of *n*-BuLi in THF (16.9 mL, 33.8 mL, 2.0 M) at –20 °C. The reaction was maintained at –20 °C for 1 h and then 3-furylaldehyde (3.2 mL, 33.8 mmol) was added drop wise via syringe over 10 min. The reaction mixture was aged at –20 °C for an additional 1.5 h and then treated a second equivalent of *n*-BuLi (16.9 mL, 33.8 mmol, 2.0 M in THF). After an additional 1.5 h at –20 °C, 5-iodopentyne (2.91 g, 15.0 mmol) was added via syringe and the

resulting solution was allowed to slowly warm to rt over 16 h. The reaction was then treated with saturated aq. NH<sub>4</sub>Cl (20 mL). The resulting slurry was transferred to a separatory funnel and extracted with Et<sub>2</sub>O (3 x 25 mL). The combined organic extracts were washed with brine (75 mL), dried over MgSO<sub>4</sub>, filtered, and concentrated under reduced pressure. The resulting crude residue was purified by flash chromatography (SiO<sub>2</sub>; 10:1 hexanes/EtOAc) to afford **S5** (616 mg, 3.80 mmol, 25% yield) as a yellow oil: **<sup>1</sup>H NMR** (400 MHz, CDCl<sub>3</sub>) δ 9.96 (s, 1H), 7.32 (d, *J* = 2.1, 1H), 6.68 (d, *J* = 2.0, 1H), 3.09 (t, *J* = 7.3, 2H), 2.23 (td, *J* = 6.8, 2.6, 2H), 2.01 (t, *J* = 2.7, 1H), 1.94 (quint, *J* = 7.1, 2H); **<sup>13</sup>C NMR** (100 MHz, CDCl<sub>3</sub>) δ **C**: 164.6, 123.1, 83.0; **CH**: 184.9, 142.4, 108.1, 69.7; **CH<sub>2</sub>**: 26.8, 25.5, 17.8; **IR** (thin film): 2118, 1676, cm<sup>-1</sup>; **HRMS-ESI** (*m/z*) [M+H]<sup>+</sup> calculated for C<sub>10</sub>H<sub>11</sub>O<sub>2</sub> = 163.0754; found 163.0757.

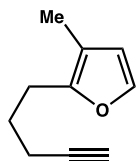

**S6:** C<sub>10</sub>H<sub>12</sub>O  
MW: 148.21

**3-methyl-2-(pent-4-yn-1-yl)furan (S6):** A solution of **S5** (159 mg, 0.98 mmol) and benzenesulfonyl hydrazide (201 mg, 1.08 mmol) in MeOH (5 mL) was maintained at rt. After 3 h, the reaction mixture concentrated under reduced pressure. The resulting hydrazone (193 mg, ca. 90% purity) was used directly without further purification.

NaBH<sub>4</sub> (80 mg, 2.1 mmol) was added in a single portion to a solution of the hydrazone prepared above in AcOH (3 mL) at rt. The reaction mixture was warmed to 40 °C. After 3 h, the reaction was cooled to rt and then diluted with hexanes (25 mL). The mixture was transferred to a separatory funnel and washed with saturated aq. NaHCO<sub>3</sub> (2 x 20 mL) and brine (20 mL). The organic layer was dried over MgSO<sub>4</sub>, filtered, and concentrated under reduced pressure. The resulting residue was purified by flash chromatography (SiO<sub>2</sub>; hexanes) to afford **S6** (83 mg, 0.4 mmol, 41% yield) as a colorless oil: **<sup>1</sup>H NMR** (400 MHz, CDCl<sub>3</sub>) δ 7.22 (d, *J* = 1.8, 1H), 6.16 (d, *J* = 1.8, 1H), 2.69 (t, *J* = 7.2, 2H), 2.18 (td, *J* = 7.0, 2.7, 2H), 1.97–1.98 (m, 4H), 1.83 (quint, *J* = 7.1, 2H); **<sup>13</sup>C NMR** (150 MHz, CDCl<sub>3</sub>) δ **C**: 150.1, 114.5, 84.1; **CH**: 140.0, 112.7, 68.6; **CH<sub>2</sub>**: 27.2, 24.6, 17.7; **CH<sub>3</sub>**: 9.8; **IR** (thin film): 2923, 2853 cm<sup>-1</sup>; **HRMS-DART** (*m/z*) [M+H]<sup>+</sup> calculated for C<sub>10</sub>H<sub>13</sub>O = 149.0961; found 149.0967.

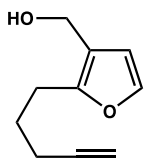

**S7:** C<sub>10</sub>H<sub>12</sub>O<sub>2</sub>  
MW: 164.20

**(2-(pent-4-yn-1-yl)furan-3-yl)methanol (S4):** NaBH<sub>4</sub> (110 mg, 5.60 mmol) was added in a single portion to a rapidly stirred slurry of **S3** (300 mg, 1.80 mmol) in a 9:1 mixture of Et<sub>2</sub>O/H<sub>2</sub>O (2 mL) at rt. After 3 h, and additional equivalent of NaBH<sub>4</sub> (68 mg, 1.8 mmol) was added and stirring was continued for an additional 2 h. The reaction was treated with H<sub>2</sub>O (15 mL), transferred to a separatory funnel, and extracted with Et<sub>2</sub>O (3 x 25 mL). The combined organic extracts were dried over MgSO<sub>4</sub>, filtered, and concentrated. The resulting crude residue was purified by flash chromatography (SiO<sub>2</sub>; 4:1 hexanes/EtOAc) to afford **S8** (300 mg, 1.80 mmol, >95% yield) as a colorless oil: **<sup>1</sup>H NMR** (400 MHz, CDCl<sub>3</sub>) δ 7.28 (d, *J* = 1.9, 1H), 6.38 (d, *J* = 1.9, 1H), 4.50 (s, 2H), 2.79 (t, *J* = 7.1, 2H), 2.17 (td, *J* = 6.8, 2.6, 2H), 2.01 (t, *J* = 2.7, 1H), 1.86 (quint, *J* = 7.1, 2H), 1.49 (br, 1H); **<sup>13</sup>C NMR** (100 MHz, CDCl<sub>3</sub>) δ **C:** 151.7, 119.8, 83.8; **CH:** 141.0, 110.9, 69.1; **CH<sub>2</sub>:** 56.4, 26.9, 24.5, 17.5; **IR (thin film):** 3295, 2117 cm<sup>-1</sup> **HRMS-DART** (m/z) [M+NH<sub>4</sub>]<sup>+</sup> calculated for C<sub>10</sub>H<sub>16</sub>NO<sub>2</sub> = 182.1176; found 182.1183.

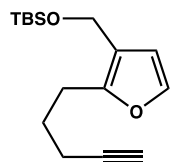

**S8:** C<sub>16</sub>H<sub>26</sub>O<sub>2</sub>Si  
MW: 278.47

**tert-butyldimethyl((2-(pent-4-yn-1-yl)furan-3-yl)methoxy)silane (S8):** A solution of **S5** (300 mg, 1.82 mmol) and imidazole (620 mg, 3.69 mmol) in CH<sub>2</sub>Cl<sub>2</sub> (4 mL) was cooled to 0 °C and treated with a solution of TBSCl (390 mg, 2.58 mmol) in CH<sub>2</sub>Cl<sub>2</sub> (4 mL). The reaction mixture was warmed to rt and maintained for 30 min. The reaction was then treated with H<sub>2</sub>O (10 mL). The resulting slurry was transferred to a separatory funnel and extracted with CH<sub>2</sub>Cl<sub>2</sub> (3 x 10 mL). The combined organic extracts were dried over MgSO<sub>4</sub>, filtered, and concentrated under reduced pressure. The resulting crude residue was purified by flash chromatography (SiO<sub>2</sub>; hexanes) to afford **S8** (437 mg, 1.57 mmol, 87% yield) as a yellow oil: **<sup>1</sup>H NMR** (400 MHz, CDCl<sub>3</sub>) δ 7.25 (d, *J* = 1.9, 1H), 6.32 (d, *J* = 1.9, 1H), 4.52 (s, 2H), 2.74 (t, *J* = 7.3, 2H), 2.19 (td, *J* = 7.0, 2.7, 2H), 1.97 (t, *J* = 2.6, 1H), 1.84 (quint, *J* = 7.1, 2H), 0.91 (s, 9H), 0.08 (s, 6H). **<sup>13</sup>C NMR** (150 MHz, CDCl<sub>3</sub>) δ **C:** 150.7, 119.8, 83.9, 18.4; **CH:** 140.5, 110.9, 68.7; **CH<sub>2</sub>:** 57.1, 27.2, 25.0, 17.8; **CH<sub>3</sub>:** 26.0, -5.2; **IR (thin film):** 2121 cm<sup>-1</sup>; **HRMS-DART** (m/z) [M+NH<sub>4</sub>]<sup>+</sup> calculated for C<sub>16</sub>H<sub>30</sub>NO<sub>2</sub>Si = 296.2040; found 296.2050.

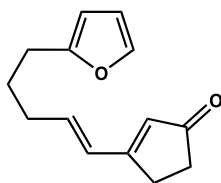

**4:** C<sub>14</sub>H<sub>16</sub>O<sub>2</sub>  
MW: 216.28

**Synthesis of photosubstrates 4, 12a–c, 12e–h, 12j and 13–15. Representative Procedure for (E)-3-(5-(furan-2-yl)pent-1-en-1-yl)cyclopent-2-en-1-one (4):** A solution of [Rh(cod)Cl]<sub>2</sub> (31 mg, 0.06 mmol) and (±)-BINAP (96 mg, 0.15 mmol) in THF (10 mL) was stirred for 1 h at rt. In parallel, a suspension of Cp<sub>2</sub>ZrHCl (3.40 g, 13.2 mmol) in THF (20 mL) was treated with **8** (1.62 g, 12.0 mmol) and stirred for 1 h at rt. Freshly distilled cyclopentenone (0.84 mL, 10 mmol) was added to the catalyst mixture via syringe, followed by the alkenylzirconocene solution. The reaction mixture was warmed to 30 °C and maintained until cyclopentenone was fully consumed by TLC (R<sub>f</sub> = 0.2; 4:1 hexanes/EtOAc). After 3 h, the dark reaction mixture was cooled to 0 °C and a solution of *N*-tert-butylphenylsulfinimidoyl chloride in PhH (5.7 mL, 11.3 mmol, 2 M) was added rapidly as a stream via syringe. After 1 h, the reaction mixture was poured into a solution of 1:1 hexanes/Et<sub>2</sub>O (150 mL) and stirred for 15 min at rt. The resulting precipitate was removed by filtration and the crude filtrate was concentrated under reduced pressure. The resulting crude residue was purified by flash chromatography (SiO<sub>2</sub>; 97:3 CH<sub>2</sub>Cl<sub>2</sub>/Et<sub>2</sub>O) to afford **4** (1.77 g, 8.18 mmol, 82% yield) as a yellow oil: **<sup>1</sup>H NMR** (400 MHz, CDCl<sub>3</sub>) δ 7.29–7.28 (m, 1H), 6.55 (d, *J* = 15.8, 1H), 6.30 (dt, *J* = 15.7, 7.0, 1H), 6.28–6.27 (m, 1H), 6.00 (d, *J* = 3.1, 1H), 5.96 (s, 1H), 2.72 (m, 2H), 2.67 (t, *J* = 7.4, 2H), 2.45 (m, 2H), 2.28 (q, *J* = 7.2, 2H), 1.83 (quint, *J* = 7.5, 2H) **<sup>13</sup>C NMR** (100 MHz, CDCl<sub>3</sub>) δ **C:** 209.6, 172.6, 155.4; **CH:** 140.9, 140.1, 129.3, 127.1, 110.1, 105.2; **CH<sub>2</sub>:** 34.8, 32.5, 27.4, 27.1, 27.0; **IR (thin film):** 1698, 1673, 1578, 1507 cm<sup>-1</sup>; **HRMS-ESI** (m/z) [M+Na]<sup>+</sup> calculated for C<sub>14</sub>H<sub>16</sub>O<sub>2</sub>Na = 239.1048; found 239.1054.

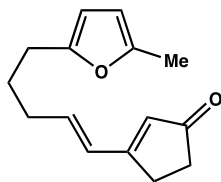

**12a:** C<sub>15</sub>H<sub>18</sub>O<sub>2</sub>  
MW: 230.31

**Photosubstrate 12a:** Prepared following the procedure reported for **4** employing alkyne **S1** (298 mg, 2.40 mmol) and cyclopentenone (0.2 mL, 2.0 mmol). The crude reaction mixture was purified by flash chromatography (SiO<sub>2</sub>; 97:3→47:3 CH<sub>2</sub>Cl<sub>2</sub>/Et<sub>2</sub>O) to afford **12a** (203 mg, 0.88 mmol, 44% yield) as a yellow oil: **<sup>1</sup>H NMR** (400 MHz, CDCl<sub>3</sub>) δ 6.54 (d, *J* = 15.8, 1H), 6.31 (dt, *J* = 15.7, 7.0, 1H), 5.96 (s, 1H), 5.87–5.84 (m, 2H), 2.73–2.71 (m, 2H), 2.61 (t, *J* = 7.4, 2H), 2.46–2.43 (m, 2H), 2.29 (q, *J* = 7.8, 2H), 2.25 (s, 3H), 1.80 (quint, *J* = 7.6, 2H); **<sup>13</sup>C NMR** (100 MHz, CDCl<sub>3</sub>) δ **C:** 209.5, 172.6, 153.5, 150.3; **CH:** 140.3, 129.2, 127.0, 105.8, 105.7; **CH<sub>2</sub>:** 34.8, 32.5, 27.5, 27.2, 27.0; **CH<sub>3</sub>:** 13.5; **IR (thin film):** 1699, 1673, 1637, 1576 cm<sup>-1</sup>; **HRMS-ESI** (m/z) [M+Na]<sup>+</sup> calculated for C<sub>15</sub>H<sub>18</sub>O<sub>2</sub>Na = 253.1205; found 253.1206.



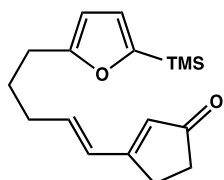

**12b:** C<sub>17</sub>H<sub>24</sub>O<sub>2</sub>Si  
MW: 288.46

**Photosubstrate 12b:** Prepared following the procedure reported for **4** employing alkyne **S2** (495 mg, 2.40 mmol) and cyclopentenone (0.2 mL, 2.0 mmol). The crude reaction mixture was purified by flash chromatography (SiO<sub>2</sub>; 97:3→47:3 CH<sub>2</sub>Cl<sub>2</sub>/Et<sub>2</sub>O) to afford **12b** (323 mg, 1.12 mmol, 56% yield) as a yellow oil: **<sup>1</sup>H NMR** (400 MHz, CDCl<sub>3</sub>) δ 6.57–6.52 (m, 2H), 6.31 (dt, *J* = 15.7, 7.0, 1H), 5.98 (d, *J* = 3.1, 1H), 5.96 (s, 1H), 2.74–2.68 (m, 4H), 2.46–2.43 (m, 2H), 2.30 (q, *J* = 7.4, 2H), 1.83 (quint, *J* = 7.5, 2H), 0.24 (s, 9H); **<sup>13</sup>C NMR** (100 MHz, CDCl<sub>3</sub>) δ **C**: 209.1, 172.4, 159.7, 158.3; **CH**: 140.1, 129.1, 127.0, 120.5, 105.2; **CH<sub>2</sub>**: 34.7, 32.5, 27.5, 27.0, 26.9; **CH<sub>3</sub>**: –1.5; **IR (thin film)**: 2955, 1701, 1673, 1438 cm<sup>-1</sup>; **HRMS-ESI**

(*m/z*) [M+H]<sup>+</sup> calculated for C<sub>17</sub>H<sub>25</sub>SiO<sub>2</sub> = 289.1624; found 289.1617.

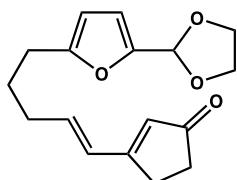

**12c:** C<sub>17</sub>H<sub>20</sub>O<sub>4</sub>  
MW: 288.34

**Photosubstrate 12c:** Prepared following the procedure reported for **4** employing alkyne **S3** (495 mg, 2.40 mmol) and cyclopentenone (0.2 mL, 2.0 mmol). The crude reaction mixture was purified by flash chromatography (SiO<sub>2</sub>; 97:3→47:3 CH<sub>2</sub>Cl<sub>2</sub>/Et<sub>2</sub>O) to afford **12c** (332 mg, 1.15 mmol, 58% yield) as a yellow oil: **<sup>1</sup>H NMR** (400 MHz, CDCl<sub>3</sub>) δ 6.55 (d, *J* = 15.7, 1H), 6.35 (d, *J* = 3.2, 1H), 6.30 (dt, *J* = 15.4, 7.0, 1H), 5.98–5.96 (m, 2H), 5.85 (s, 1H), 4.17–4.09 (m, 2H), 4.04–3.96 (m, 2H), 2.73–2.71 (m, 2H), 2.67 (t, *J* = 7.4, 2H), 2.46–2.43 (m, 2H), 2.29 (q, *J* = 7.0, 2H), 1.83 (quint, *J* = 7.7, 2H); **<sup>13</sup>C NMR** (100 MHz, CDCl<sub>3</sub>) δ **C**: 209.1, 172.4, 156.2, 149.2; **CH**: 139.9, 129.0, 127.0, 109.4, 105.7, 97.7; **CH<sub>2</sub>**: 64.9, 34.6,

32.3, 27.3, 26.9, 26.7; **IR (thin film)**: 1693, 1673, 1473, 1096 cm<sup>-1</sup>; **HRMS-ESI** (*m/z*) [M+H]<sup>+</sup> calculated for C<sub>17</sub>H<sub>21</sub>O<sub>4</sub>Na = 289.1434; found 289.1438.

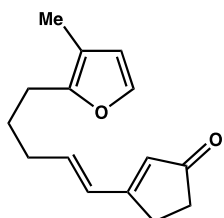

**12e:** C<sub>15</sub>H<sub>18</sub>O<sub>2</sub>  
MW: 230.31

**Photosubstrate 12e:** **<sup>1</sup>H NMR** (400 MHz, CDCl<sub>3</sub>) δ 7.22 (d, *J* = 1.8, 1H), 6.53 (d, *J* = 15.8, 1H), 6.28 (dt, *J* = 15.7, 6.9, 1H), 6.16 (d, *J* = 1.8, 1H), 5.95 (s, 1H), 2.72 (dd, *J* = 4.9, 3.2, 2H), 2.60 (t, *J* = 7.2, 2H), 2.46–2.43 (m, 2H), 2.24 (q, *J* = 6.9, 2H), 1.95 (s, 3H), 1.80 (quint, *J* = 7.3, 2H); **<sup>13</sup>C NMR** (150 MHz, CDCl<sub>3</sub>) δ **C**: 209.6, 172.6, 150.4, 114.2; **CH**: 140.3, 139.9, 129.2, 126.9, 112.8; **CH<sub>2</sub>**: 34.8, 32.5, 27.3, 27.1, 25.3; **CH<sub>3</sub>**: 9.8; **IR (thin film)**: 1702 cm<sup>-1</sup>; **HRMS-ESI** (*m/z*) [M+Na]<sup>+</sup> calculated for C<sub>14</sub>H<sub>16</sub>O<sub>2</sub>Na = 253.1205; found 253.1201.

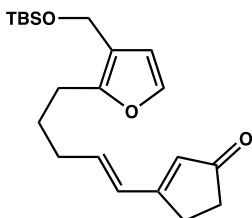

**12f:** C<sub>21</sub>H<sub>32</sub>O<sub>3</sub>Si  
MW: 360.57

**Photosubstrate 12f:** Prepared following the procedure reported for **4** employing alkyne **S8** (334 mg, 1.20 mmol) and cyclopentenone (0.1 mL, 1.0 mmol). The crude reaction mixture was purified by flash chromatography (SiO<sub>2</sub>; 97:3 CH<sub>2</sub>Cl<sub>2</sub>/Et<sub>2</sub>O) to afford **12f** (120 mg, 0.33 mmol, 33% yield) as a yellow oil: **<sup>1</sup>H NMR** (400 MHz, CDCl<sub>3</sub>) δ 7.24 (d, *J* = 1.8, 1H), 6.53 (d, *J* = 15.8, 1H), 6.32–6.24 (m, 2H), 5.95 (s, 1H), 4.49 (s, 2H), 2.72 (dd, *J* = 4.9, 3.4, 2H), 2.66 (t, *J* = 7.3, 2H), 2.45–2.43 (m, 2H), 2.25 (q, *J* = 7.0, 2H), 1.81 (quint, *J* = 7.0, 2H), 0.90 (s, 9H), 0.07 (s, 6H); **<sup>13</sup>C NMR** (100 MHz, CDCl<sub>3</sub>) δ **C**: 209.5, 172.5, 151.2, 119.4, 18.3; **CH**: 140.3, 140.2, 129.2, 126.9, 110.9; **CH<sub>2</sub>**: 57.1, 34.7, 32.5, 27.4, 27.0, 25.7; **CH<sub>3</sub>**: 25.9, –5.2; **IR (thin film)**: 2929, 1702, 1672, 1079 cm<sup>-1</sup>; **HRMS-ESI**

(*m/z*) [M+Na]<sup>+</sup> C<sub>21</sub>H<sub>32</sub>SiO<sub>3</sub> = 383.2018; found 383.2014.

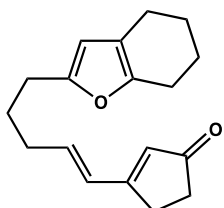

**12g:** C<sub>18</sub>H<sub>22</sub>O<sub>2</sub>  
MW: 270.37

**Photosubstrate 12g:** Prepared following the procedure reported for **4** employing alkyne **S4** (323 mg, 1.72 mmol) and cyclopentenone (0.1 mL, 1.4 mmol). The crude reaction mixture was purified by flash chromatography (SiO<sub>2</sub>; 97:3 CH<sub>2</sub>Cl<sub>2</sub>/Et<sub>2</sub>O) to afford **12g** (174 mg, 0.644 mmol, 45% yield) as an orange oil: **<sup>1</sup>H NMR** (400 MHz, CDCl<sub>3</sub>) δ 6.54 (d, *J* = 15.8, 1H), 6.30 (dt, *J* = 15.7, 6.9, 1H), 5.96 (s, 1H), 5.80 (s, 1H), 2.73–2.71 (m, 2H), 2.60 (t, *J* = 7.4, 2H), 2.53 (t, *J* = 5.9, 2H), 2.46–2.43 (m, 2H), 2.38–2.35 (m, 2H), 2.29 (q, *J* = 7.1, 2H), 1.84–1.76 (m, 4H), 1.72–1.66 (m, 2H); **<sup>13</sup>C NMR** (100 MHz, CDCl<sub>3</sub>) δ **C**: 209.6, 172.6, 152.9, 148.9, 117.2; **CH**: 140.4, 129.2, 126.9, 106.1; **CH<sub>2</sub>**: 34.8, 32.6, 27.6, 27.3, 27.0, 23.2, 23.2, 23.1, 22.1; **IR (thin film)**: 1701, 1674, 1639, 1578 cm<sup>-1</sup>; **HRMS-ESI** (*m/z*) [M+Na]<sup>+</sup>

calculated for C<sub>18</sub>H<sub>22</sub>O<sub>2</sub>Na = 293.1518; found 293.1511.

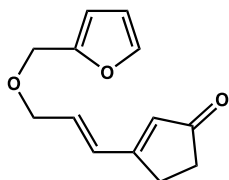

**12h:** C<sub>13</sub>H<sub>14</sub>O<sub>3</sub>  
MW: 218.25

**Photosubstrate 12h:** Prepared following the procedure reported for **4** employing 2-((prop-2-yn-1-yloxy)methyl)furan<sup>6</sup> (329 mg, 2.40 mmol) and cyclopentenone (0.2 mL, 2.0 mmol). The crude reaction mixture was purified by flash chromatography (SiO<sub>2</sub>; 1:1 CH<sub>2</sub>Cl<sub>2</sub>/Hex → 95:5 hexanes/Et<sub>2</sub>O) to afford **12h** (176 mg, 0.78 mmol, 39% yield) as a yellow foam: **<sup>1</sup>H NMR** (400 MHz, CDCl<sub>3</sub>) δ 7.42 (s, 1H), 6.75 (d, *J* = 15.9, 1H), 6.34–6.28 (m, 2H), 6.03 (s, 1H), 4.51 (s, 2H), 4.19 (dd, *J* = 1.2, 5.2, 2H), 2.74–2.72 (m, 2H), 2.46–2.44 (m, 2H); **<sup>13</sup>C NMR** (100 MHz, CDCl<sub>3</sub>) δ **C**: 209.3, 171.4, 151.2; **CH**: 142.9, 135.3, 130.5, 126.9, 110.3, 109.6; **CH<sub>2</sub>**: 69.4, 64.4, 34.7, 26.9; **IR (thin film)**: 2933, 1665, 1252, 998 cm<sup>-1</sup>; **HRMS-ESI**

(*m/z*) [M+Na]<sup>+</sup> C<sub>13</sub>H<sub>14</sub>O<sub>3</sub> = 219.1016; found 219.1020.

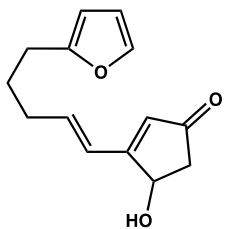

**12j:** C<sub>14</sub>H<sub>16</sub>O<sub>3</sub>  
MW: 232.28

**Photosubstrate 12j:** Prepared in two steps. Following the procedure reported for **4**, alkyne **8** (177 mg, 1.31 mmol) was coupled with 4[(*tert*-butyldimethylsilyloxy)cyclopent-2-enone<sup>7</sup> (231 mg, 1.09 mmol). The crude reaction mixture was used directly in the subsequent step. An analytical sample of TBS-protected **12j** was prepared for characterization: **<sup>1</sup>H NMR** (400 MHz, CDCl<sub>3</sub>) δ 7.30 (s, 1H), 6.50 (dt, *J* = 22.8, 7.0, 1H), 6.37–6.25 (m, 2H), 6.03–5.96 (m, 2H), 5.04 (d, *J* = 4.5, 1H), 2.75 (dd, *J* = 18.0, 6.2, 2H), 2.66 (t, *J* = 7.4, 2H), 2.38–2.24 (m, 3H), 1.82 (pent, *J* = 7.4, 2H), 0.90 (s, 9H), 0.14 (d, *J* = 17.6, 6H); **<sup>13</sup>C NMR** (100 MHz, CDCl<sub>3</sub>) δ **C**: 205.1, 171.9, 155.4, 119.4, 18.3; **CH**: 140.3, 140.2, 129.2, 126.9, 110.9; **CH<sub>2</sub>**: 57.1, 34.7, 32.5, 27.4, 27.0, 25.7; **CH<sub>3</sub>**: 25.9, -5.2; **HRMS-ESI** (*m/z*) [M+Na]<sup>+</sup> C<sub>20</sub>H<sub>30</sub>SiO<sub>3</sub> =

369.18619; found 369.18559.

A solution of the unpurified intermediate prepared above in THF (5 mL) was cooled to 0 °C and treated with tetrabutylammonium fluoride (2.3 mmol, 2.3 mL, 1.0 M in THF). The reaction mixture was maintained at 0 °C for 5 min and then treated with water (15 mL). The resulting slurry was extracted with EtOAc (3 x 15 mL). The combined organic extracts were washed with brine (10 mL), dried over MgSO<sub>4</sub>, filtered, and concentrated under reduced pressure. The resulting crude residue was purified by flash chromatography (SiO<sub>2</sub>; 2:1 hexanes/EtOAc) to afford **12j** (371 mg, 1.60 mmol, 70% yield overall) as a yellow oil: **<sup>1</sup>H NMR** (400 MHz, CDCl<sub>3</sub>) δ 7.30 (d, *J* = 1.0, 1H), 6.60 (dt, *J* = 22.8, 7.0, 1H), 6.42 (d, *J* = 16.0, 1H), 6.29 (t, *J* = 2.0, 1H), 6.00–5.99 (m, 2H), 5.12 (t, *J* = 6.0, 1H), 2.84 (t, *J* = 7.4, 2H), 2.40–2.29 (m, 3H), 1.85 (quint, *J* = 7.2, 2H); **<sup>13</sup>C NMR** (100 MHz, CDCl<sub>3</sub>) δ **C**: 205.8, 172.3, 155.4; **CH**: 143.4, 129.1, 124.4, 110.2, 105.2, 69.6; **CH<sub>2</sub>**: 49.5, 32.9, 27.4, 26.9; **IR (thin film)**: 3388, 2931, 1678, 1639, 1434 cm<sup>-1</sup>; **HRMS-ESI** (*m/z*) [M+Na]<sup>+</sup> calculated for C<sub>14</sub>H<sub>16</sub>O<sub>3</sub>Na = 255.09971; found 255.10023.

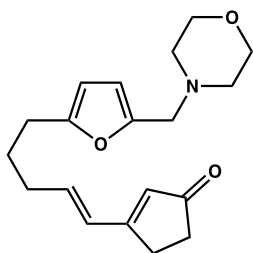

**12d:** C<sub>19</sub>H<sub>25</sub>NO<sub>3</sub>  
MW: 315.41

**Photosubstrate 12d:** Following a modification of the procedure reported by Heaney,<sup>8</sup> a solution of **4** (541 mg, 2.50 mmol) in THF (3 mL) was added to a stirred suspension of *N*-(methylene)morpholinium chloride (229 mg, 2.50 mmol) in THF (5 mL). The resulting slurry was stirred at rt. After 16 h, the reaction mixture was transferred to a separatory funnel and partitioned between Et<sub>2</sub>O (12 mL) and saturated aq. NaHCO<sub>3</sub> (35 mL). The organic layer was separated and the aqueous layer was extracted with Et<sub>2</sub>O (4 x 10 mL). The combined organic layers were washed with water (10 mL) and brine (10 mL), dried over MgSO<sub>4</sub>, filtered, and concentrated under reduced pressure. The resulting crude residue was purified by flash chromatography (SiO<sub>2</sub>; 98:2 → 90:10 Et<sub>2</sub>O/MeOH) to afford **12d** (724 mg, 2.27 mmol, 91% yield) as a yellow oil: **<sup>1</sup>H NMR** (400 MHz, CDCl<sub>3</sub>) δ 6.51

(d, *J* = 15.7, 1H), 6.31–6.24 (m, 1H), 6.08 (d, *J* = 3.0, 1H), 5.93 (s, 1H), 5.89 (d, *J* = 3.0, 1H), 3.69 (t, *J* = 4.48, 4H), 3.46 (s, 2H), 2.71–2.69 (m, 2H), 2.62 (t, *J* = 7.5, 2H), 2.44–2.40 (m, 6H), 2.26 (q, *J* = 7.3, 2H), 1.78 (quint, *J* = 7.4, 2H); **<sup>13</sup>C NMR** (100 MHz, CDCl<sub>3</sub>) δ **C**: 209.5, 172.4, 155.4, 149.4; **CH**: 140.0, 129.3, 127.2, 109.8, 105.7; **CH<sub>2</sub>**: 66.8, 55.4, 53.2, 34.8, 32.5, 27.6, 27.0; **IR (thin film)**: 2858, 1701, 1670, 1451 cm<sup>-1</sup>; **HRMS-ESI** (*m/z*) [M+Na]<sup>+</sup> calculated for C<sub>19</sub>H<sub>25</sub>NO<sub>3</sub>Na = 338.1732; found 338.1739.

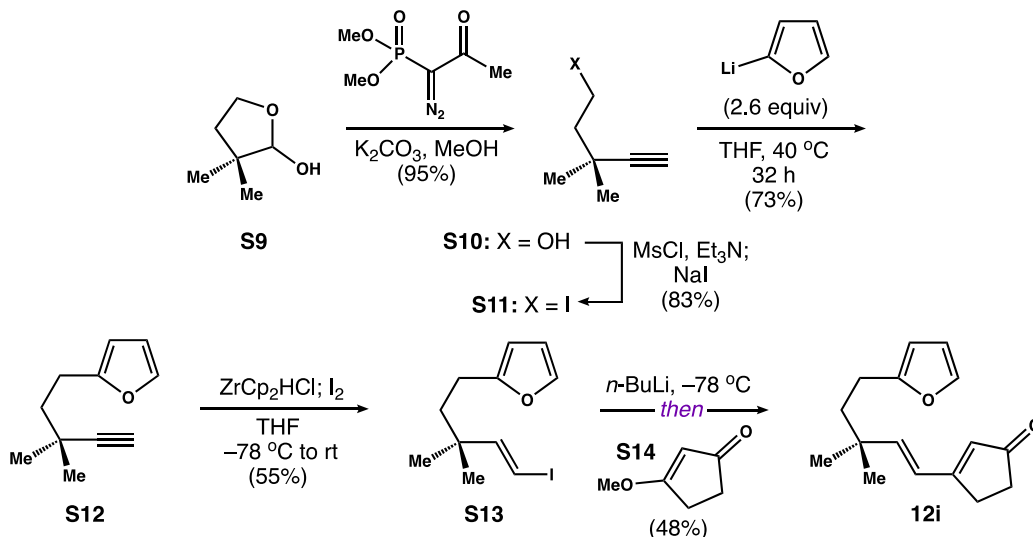

Scheme S2. Preparation of photosubstrate 12i.

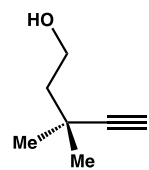

**S10:** C<sub>7</sub>H<sub>12</sub>O  
MW: 112.17

**3,3-dimethylpent-4-yn-1-ol (S10):** Following a modification of the procedure reported by Perumal,<sup>9</sup> Ohira-Bestmann reagent (3.11 g, 16.2 mmol) was added drop wise via syringe to a stirred suspension of **S9** (935 mg, 8.10 mmol) and K<sub>2</sub>CO<sub>3</sub> (5.60 g, 40.5 mmol) in MeOH (54 mL). After addition, the reaction was stirred at rt for 27 h and then concentrated under reduced pressure. The resulting residue was digested in water (50 mL) and extracted with Et<sub>2</sub>O (4 x 50 mL). The combined organics were washed with brine (100 mL), dried over MgSO<sub>4</sub>, filtered, and concentrated under reduced pressure. The crude residue was purified by flash chromatography (SiO<sub>2</sub>; 9:1 hexanes/EtOAc) to afford **S10** (882 mg, 7.70 mmol, 95% yield) as a colorless oil: **<sup>1</sup>H NMR** (400 MHz, CDCl<sub>3</sub>) δ 3.86 (t, *J* = 6.6, 2H), 2.16 (s, 1H), 1.72 (t, *J* = 6.6, 2H), 1.26 (s, 6H). All other characterization data was identical to previous reported values.<sup>10</sup>

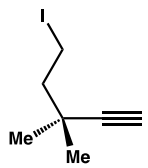

**S11:** C<sub>7</sub>H<sub>11</sub>I  
MW: 222.07

**5-iodo-3,3-dimethylpent-1-yne (S11):** Freshly distilled methanesulfonyl chloride (0.9 mL, 11 mmol) was added drop wise to a solution of **S10** (978 mg, 8.71 mmol) and Et<sub>3</sub>N (3.6 mL, 25 mmol) in CH<sub>2</sub>Cl<sub>2</sub> maintained at 0 °C. The resulting solution was warmed to rt and maintained for 1 h. The reaction mixture was then diluted with CH<sub>2</sub>Cl<sub>2</sub> (40 mL) and treated with saturated aq. NaHCO<sub>3</sub> (30 mL). The resulting slurry was extracted with CH<sub>2</sub>Cl<sub>2</sub> (3 x 20 mL). The combined organic extracts were washed with water (50 mL) and brine (50 mL), dried over MgSO<sub>4</sub>, filtered, and concentrated under reduced pressure. The resulting crude mesylate (1.30 g) was used directly in the next step without further purification.

The crude residue prepared above was dissolved in acetone (17 mL) and NaI (4.05 g, 27.0 mmol) was added in a single portion. The resulting suspension was warmed to 70 °C and stirred for 18 h. The reaction mixture was then cooled to rt and concentrated under reduced pressure. The resulting solid was digested in water (50 mL) and extracted with Et<sub>2</sub>O (4 x 30 mL). The combined organic extracts were dried over MgSO<sub>4</sub>, filtered, and concentrated under reduced pressure. The resulting oil was purified by flash chromatography (SiO<sub>2</sub>, hexanes) to afford **S11** (1.60 g, 7.20 mmol, 83% overall yield from **S10**) as a colorless oil: **<sup>1</sup>H NMR** (400 MHz, CDCl<sub>3</sub>) δ 3.31–3.27 (m, 2H), 2.14 (s, 1H), 2.08–2.03 (m, 2H), 1.22 (s, 6H); **<sup>13</sup>C NMR** (100 MHz, CDCl<sub>3</sub>) δ **C**: 89.7, 33.3; **CH**: 69.1; **CH<sub>2</sub>**: 47.8, 28.7; **CH<sub>3</sub>**: 0.11; **IR** (thin film): 3298, 2969, 1469, 1199 cm<sup>-1</sup>; **HRMS-ESI** (*m/z*) [M+H]<sup>+</sup> calculated for C<sub>7</sub>H<sub>12</sub>I = 222.9978; found 222.9969.

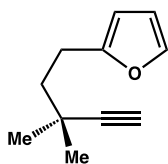

**S12:** C<sub>11</sub>H<sub>14</sub>O  
MW: 162.23

**2-(3,3-dimethylpent-4-yn-1-yl)furan (S12):** Following a modification of the procedure reported for **S1**, a solution of furan (0.6 mL, 8.0 mmol) in THF (4 mL) was cooled to -78 °C. A solution of *n*-BuLi (2.9 mL, 5.2 mmol, 1.8 M in THF) was added drop wise via syringe. The resulting solution was warmed to 0 °C. After 4 h, **S11** (444 mg, 2.00 mmol) was added via syringe. The reaction mixture was warmed to rt over 15 min and then heated to 42 °C. After 32 h, the reaction was cooled to rt and treated with water (10 mL, **caution: exothermic**). The resulting slurry was extracted with Et<sub>2</sub>O (3 x 10 mL). The combined organic extracts were washed with water (10

mL) and brine (10 mL), dried over MgSO<sub>4</sub>, filtered, and concentrated under reduced pressure. The resulting crude oil was purified by flash chromatography (SiO<sub>2</sub>; hexanes) to afford **S12** (240 mg, 1.47 mmol, 73% yield) as a yellow oil: **<sup>1</sup>H NMR** (400 MHz, CDCl<sub>3</sub>) δ 7.30 (dd, *J* = 0.7, 1.8, 1H), 6.28 (dd, *J* = 1.9, 3.1, 1H), 6.00–5.99 (m, 1H), 2.83–2.79 (m, 2H), 2.13 (s, 1H), 1.78–1.74 (m, 2H), 1.26 (s, 6H); **<sup>13</sup>C NMR** (100 MHz, CDCl<sub>3</sub>) δ **C**: 156.1, 68.47, 30.8; **CH**: 140.8, 110.1, 104.6, 90.9; **CH<sub>2</sub>**: 41.1, 24.2; **CH<sub>3</sub>**: 29.0; **IR** (thin film): 3302, 2857, 1597, 1007 cm<sup>-1</sup>; **HRMS-DART** (*m/z*) [*M*+*H*]<sup>+</sup> calculated for C<sub>11</sub>H<sub>15</sub>I = 163.1117; found 163.1114.

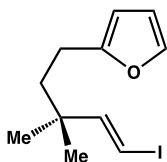

**S13**: C<sub>11</sub>H<sub>15</sub>IO  
MW: 290.14

**(E)-2-(5-iodo-3,3-dimethylpent-4-en-1-yl)furan (S13)**: A solution of **S12** (130 mg, 0.80 mmol) in THF (2 mL) was added drop wise to a stirred suspension of ZrCp<sub>2</sub>HCl (227 mg, 0.88 mmol) in THF (2 mL) at rt. After 1 h, the reaction mixture was cooled to –78 °C and a solution of I<sub>2</sub> (230 mg, 0.90 mmol) in THF (2 mL) was added drop wise via syringe over 10 min. The reaction was maintained at –78 °C for 30 min and then treated with wet Et<sub>2</sub>O (15 mL, 1% H<sub>2</sub>O by volume). The resulting slurry was warmed to rt and treated with saturated aq. Na<sub>2</sub>S<sub>2</sub>O<sub>3</sub> (5 mL). The organic layer was separated and washed with water (5 mL) and brine (5 mL). The combined organics were dried over MgSO<sub>4</sub>, filtered, and concentrated under reduced pressure. The resulting crude oil was purified by flash chromatography (SiO<sub>2</sub>; hexanes) to afford **S13** (130 mg, 0.44 mmol, 55% yield) as a yellow oil: **<sup>1</sup>H NMR** (400 MHz, CDCl<sub>3</sub>) δ 7.29 (d, *J* = 1.1, 1H), 6.50 (d, *J* = 14.6, 1H), 6.27 (dd, *J* = 1.9, 3.1, 1H), 6.00–5.96 (m, 2H), 2.57–2.53 (m, 2H), 1.67–1.63 (m, 2H), 1.05 (s, 6H); **<sup>13</sup>C NMR** (100 MHz, CDCl<sub>3</sub>) δ **C**: 156.1, 40.1; **CH**: 155.0, 140.8, 110.1, 104.5, 73.1; **CH<sub>2</sub>**: 40.7, 23.5; **CH<sub>3</sub>**: 26.2; **IR** (thin film): 2960, 1597, 1006 cm<sup>-1</sup>; **HRMS-ESI** (*m/z*) [*M*+*H*]<sup>+</sup> calculated for C<sub>11</sub>H<sub>16</sub>IO = 219.0240; found 219.0242.

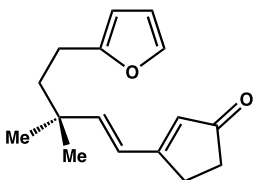

**12i**: C<sub>16</sub>H<sub>20</sub>O<sub>2</sub>  
MW: 244.33

**Photoprecursor 12i**: Following a modification of the procedure reported by Mauduit,<sup>11</sup> *n*-BuLi (0.2 mL, 0.4 mmol, 2.1 M in THF) was added drop wise via syringe to a solution of **S13** (120 mg, 0.41 mmol) in THF (1 mL) at –78 °C. After 5 min, a solution of 3-methoxycyclopent-2-enone (50 mg, 0.5 mmol) in THF (0.3 mL) was added drop wise over 30 min. The reaction mixture then allowed to warm to –30 °C and maintained for 3 h. A solution of 5% aq. H<sub>2</sub>SO<sub>4</sub> (0.5 mL) was added at –30 °C and then the reaction was allowed to warm to rt over 30 min. The resulting slurry was extracted with Et<sub>2</sub>O (3 x 5 mL). The combined organic extracts were washed with water (5 mL) and brine (5 mL), dried over MgSO<sub>4</sub>, filtered, and concentrated under reduced pressure. The resulting crude residue was purified by flash chromatography (SiO<sub>2</sub>; 9:1 hexanes/acetone) to afford **12i** (48 mg, 0.2 mmol, 48% yield) as a yellow oil: **<sup>1</sup>H NMR** (400 MHz, CDCl<sub>3</sub>) δ 7.28 (d, *J* = 1.2, 1H), 6.47 (d, *J* = 16.1, 1H), 6.27–6.22 (m, 2H), 6.00 (s, 1H), 5.96 (dd, *J* = 3.1, 0.4, 1H), 2.72 (dd, *J* = 4.9, 3.4, 2H), 2.58–2.54 (m, 2H), 2.46–2.44 (m, 2H), 1.78–1.74 (m, 2H), 1.14 (s, 6H); **<sup>13</sup>C NMR** (100 MHz, CDCl<sub>3</sub>) δ **C**: 209.5, 172.8, 155.9, 36.8; **CH**: 149.1, 140.8, 129.7, 123.3, 110.2, 104.6; **CH<sub>2</sub>**: 40.5, 36.8, 34.7, 27.0, 26.6, 13.6; **CH<sub>3</sub>**: 26.6; **IR** (thin film): 2960, 1700, 1634, 1280 cm<sup>-1</sup>; **HRMS-ESI** (*m/z*) [*M*+*Na*]<sup>+</sup> calculated for C<sub>16</sub>H<sub>20</sub>O<sub>2</sub>Na = 267.1356; found 267.1358.

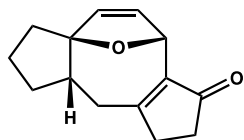

**3**: C<sub>14</sub>H<sub>16</sub>O<sub>2</sub>  
MW: 216.28

**Gram-scale preparation of 3**: A solution of **4** (1.00 g, 4.62 mmol) in *n*-BuOH (77 mL) was added to a 250 mL quartz round-bottom flask. The reaction mixture was exposed to UV light (*hν* = 350 nm) at 35 °C in a Rayonet photoreactor. After 55 h, the reaction was removed from the photoreactor, cooled to rt, and Et<sub>3</sub>N (0.7 mL, 5 mmol) was added via syringe. The resulting solution as warmed to 100 °C in a pre-heated oil bath. After 6 h, the reaction mixture was cooled to rt and concentrated under reduced pressure. The resulting residue was purified by flash chromatography (neutralized SiO<sub>2</sub>; 2:1 hexanes/EtOAc) to afford **3** (610 mg, 2.82 mmol, 61% yield) as a yellow solid: **mp** = 50–51 °C; **<sup>1</sup>H NMR** (400 MHz, CDCl<sub>3</sub>) δ 6.08 (d, *J* = 5.9, 1H), 5.86 (dd, *J* = 5.9, 1.8, 1H), 5.45 (br s, 1H), 2.55–2.46 (m, 3H), 2.41–2.25 (m, 2H), 2.16–2.11 (m, 2H), 1.93–1.70 (m, 5H), 1.32–1.25 (m, 1H); **<sup>13</sup>C NMR** (150 MHz, CDCl<sub>3</sub>) δ **C**: 206.7, 176.3, 142.1, 96.6; **CH**: 129.4, 128.6, 74.7, 49.2; **CH<sub>2</sub>**: 34.6, 34.4, 33.9, 32.1, 28.9, 20.1; **IR** (thin film): 1738, 1692, 1683, 1625 cm<sup>-1</sup>; **HRMS-ESI** (*m/z*) [*M*+*Na*]<sup>+</sup> calculated for C<sub>14</sub>H<sub>16</sub>O<sub>2</sub>Na = 239.1048; found 239.1057. Relative stereochemistry was established by single crystal X-ray diffraction (CCDC entry 1816385).<sup>12</sup>



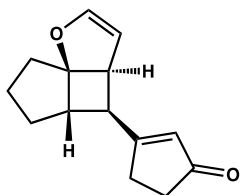

**5:** C<sub>14</sub>H<sub>16</sub>O<sub>2</sub>  
MW: 216.28

**Cyclobutane 5:** A solution of photosubstrate **4** (1.00 g, 4.62 mmol) in MeCN (77 mL) was added to a quartz flask. The reaction mixture was exposed to UV light ( $h\nu = 350$  nm) at 35 °C in a Rayonet photoreactor. After 21 h, the reaction was removed from the photoreactor and concentrated under reduced pressure. The resulting crude residue was purified by flash chromatography (neutralized SiO<sub>2</sub>; 7:2 hexanes/EtOAc) to afford **5** (530 mg, 2.45 mmol, 53% yield): **mp** = 89–90 °C; **<sup>1</sup>H NMR** (600 MHz, CDCl<sub>3</sub>)  $\delta$  6.36 (dd,  $J = 2.8, 1.4$ , 1H), 5.98 (app q,  $J = 1.5$ , 1H), 4.83 (app t,  $J = 2.6$ , 1H), 3.57 (dt,  $J = 7.9, 1.3$ , 1H), 2.96 (t,  $J = 6.7$ , 1H), 2.87 (t,  $J = 7.3$ , 1H), 2.52–2.29 (m, 2H), 2.40 (t,  $J = 4.8$ , 2H), 2.04–1.98 (m, 2H), 1.98–1.90 (m, 1H), 1.89–1.82 (m, 2H), 1.53 (dd,  $J = 12.7, 1.5$ , 1H); **<sup>13</sup>C NMR** (150 MHz, CDCl<sub>3</sub>)  $\delta$  **C**: 209.7, 181.1, 93.8; **CH**: 148.4, 129.6, 102.0, 50.1, 49.4, 43.7; **CH<sub>2</sub>**: 35.5, 33.5, 30.9, 30.8, 24.7; **HRMS-ESI** (m/z) [M+Na]<sup>+</sup> calculated for C<sub>14</sub>H<sub>16</sub>O<sub>2</sub>Na = 239.1048; found 239.1050. Relative stereochemistry was established by single crystal X-ray diffraction (CCDC entry 1816383).<sup>12</sup>

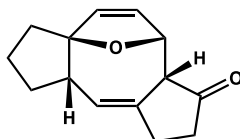

**6:** C<sub>14</sub>H<sub>16</sub>O<sub>2</sub>  
MW: 216.28

**Cope-rearrangement product 6:** An analytic sample was prepared by charging an NMR tube with a degassed solution of **5** (6.5 mg, 0.03 mmol) in toluene-d<sub>8</sub> (0.5 mL) and heating the reaction mixture to 100 °C for 1.5 h. NMR spectra were collected from the crude reaction mixture: **<sup>1</sup>H NMR** (600 MHz, toluene-d<sub>8</sub>)  $\delta$  5.69–5.66 (m, 2H), 5.31–5.29 (m, 2H), 3.24 (d,  $J = 1.5$ , 1H), 2.82–2.77 (m, 1H), 2.17–2.05 (m, 1H), 1.99–1.93 (m, 1H), 1.81–1.74 (m, 1H), 1.65–1.54 (m, 5H), 1.51–1.43 (m, 1H), 1.13–1.05 (m, 1H); **<sup>13</sup>C NMR** (150 MHz, toluene-d<sub>8</sub>)  $\delta$  **C**: 213.5, 136.6, 95.6; **CH**: 132.4, 127.4, 123.7, 81.4, 59.7, 50.5; **CH<sub>2</sub>**: 38.3, 33.4, 28.9, 27.7, 19.5; **HRMS-ESI** (m/z) [M+Na]<sup>+</sup> calculated for C<sub>14</sub>H<sub>16</sub>O<sub>2</sub>Na = 239.1048; found 239.1063. Relative stereochemistry was established by single crystal X-ray diffraction (CCDC entry 1816390).<sup>12</sup>

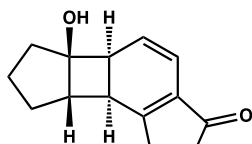

**11:** C<sub>14</sub>H<sub>16</sub>O<sub>2</sub>  
MW: 216.28

**Byproduct 11:** An analytical sample was prepared by flash chromatography (SiO<sub>2</sub>; 2:1 hexanes/EtOAc): **<sup>1</sup>H NMR** (400 MHz, CDCl<sub>3</sub>)  $\delta$  6.37 (d,  $J = 9.8$ , 1H), 5.63 (dd,  $J = 9.8, 5.1$ , 1H), 3.36 (dd,  $J = 9.2, 5.1$ , 1H), 2.67–2.54 (m, 4H), 2.46–2.43 (m, 2H), 2.36–2.30 (m, 1H), 1.98–1.79 (m, 4H), 1.69–1.63 (m, 2H); **<sup>13</sup>C NMR** (150 MHz, CDCl<sub>3</sub>) **C**: 205.3, 173.1, 132.5, 88.0; **CH**: 123.7, 119.6, 58.5, 45.3, 34.3; **CH<sub>2</sub>**: 39.5, 35.0, 32.0, 27.2, 24.6; **IR (thin film)**: 3360, 1671, 1632, 1603 cm<sup>-1</sup>; **HRMS-DART** (m/z) [M+H]<sup>+</sup> calculated for C<sub>14</sub>H<sub>17</sub>O<sub>2</sub> = 217.1223; found 217.1231. Relative stereochemistry was established by single crystal X-ray diffraction (CCDC entry 1816388).<sup>12</sup>

**Preparation of 5-8-5 ring system derivatives 13a–j. General Procedure.** A solution of photosubstrate (1 equiv) in MeCN (60 mM) was added to a quartz flask and exposed to UV light ( $h\nu = 350$  nm) at 35 °C in a Rayonet photoreactor for the indicated amount of time. The reaction was removed from the photoreactor, cooled to rt, and Et<sub>3</sub>N (1.1 equiv) was added via syringe. The resulting solution was warmed to 80 °C or 100 °C in a pre-heated oil bath for the specified amount of time. The reaction mixture was cooled to rt and concentrated under reduced pressure. The resulting crude products were purified by flash chromatography using neutralized silica gel.<sup>13</sup>

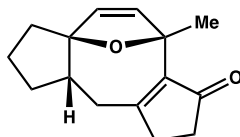

**13a:** C<sub>15</sub>H<sub>18</sub>O<sub>2</sub>  
MW: 230.31

**Product 13a:** Following the general procedure, **13a** was synthesized from **12a** (96 mg, 0.42 mmol). The reaction mixture was irradiated at 35 °C for 7.5 h. Following addition of Et<sub>3</sub>N, the resulting solution was heated to 80 °C for 2 h. The resulting crude residue was purified by flash chromatography (neutralized SiO<sub>2</sub>; 19:1 CH<sub>2</sub>Cl<sub>2</sub>/Et<sub>2</sub>O) to afford **13a** (51 mg, 0.22 mmol, 53% yield) as a colorless solid: **mp** = 88–89 °C; **<sup>1</sup>H NMR** (400 MHz, CDCl<sub>3</sub>)  $\delta$  5.96 (d,  $J = 5.7$ , 1H), 5.70 (dd,  $J = 5.8$ , 1H), 2.54–2.46 (m, 3H), 2.40–2.33 (m, 1H), 2.28–2.21 (m, 1H), 1.91–1.81 (m, 4H), 1.79 (s, 3H), 1.76–1.69 (m, 1H), 1.29–1.22 (m, 1H); **<sup>13</sup>C NMR** (100 MHz, CDCl<sub>3</sub>)  $\delta$  **C**: 206.6, 176.8, 142.9, 96.9, 84.7; **CH**: 132.9, 127.9, 48.5; **CH<sub>2</sub>**: 35.8, 35.3, 34.2, 32.2, 28.5, 20.2; **CH<sub>3</sub>**: 22.7; **IR (thin film)**: 1680, 1598 cm<sup>-1</sup>; **HRMS-ESI** (m/z) [M+Na]<sup>+</sup> calculated for C<sub>14</sub>H<sub>16</sub>O<sub>2</sub>Na = 253.1205; found 253.1207.

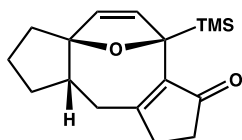

**13b:** C<sub>17</sub>H<sub>24</sub>O<sub>2</sub>Si  
MW: 288.46

**Product 13b:** Following the general procedure, **13b** was synthesized from **12b** (145 mg, 0.50 mmol). The reaction mixture was irradiated at 35 °C for 12 h. Following addition of Et<sub>3</sub>N, the resulting solution was heated to 80 °C for 15.5 h. The resulting crude residue was purified by flash chromatography (neutralized SiO<sub>2</sub>; 9:1 hexanes/acetone) to afford **13b** (69 mg, 0.24 mmol, 48% yield) as a colorless solid: **mp** = 57–58 °C; **<sup>1</sup>H NMR** (400 MHz, CDCl<sub>3</sub>) δ 5.90 (d, *J* = 5.8, 1H), 5.70 (d, *J* = 5.9, 1H), 2.57–2.50 (m, 3H), 2.37–2.30 (m, 1H), 2.27–2.17 (m, 2H), 2.13–2.04 (m, 1H), 1.95–1.77 (m, 4H), 1.75–1.64 (m, 1H), 1.31–1.19 (m, 1H), 0.12 (s, 9H); **<sup>13</sup>C NMR** (100 MHz, CDCl<sub>3</sub>) δ **C**: 206.7, 177.9, 144.9, 98.1, 80.3; **CH**: 130.2, 126.6, 48.9; **CH<sub>2</sub>**: 35.4, 34.1, 33.5, 33.2, 28.5, 20.3; **CH<sub>3</sub>**: –2.1; **IR** (thin film): 1670, 1591 cm<sup>-1</sup>; **HRMS-ESI** (m/z) [M+Na]<sup>+</sup> calculated for C<sub>17</sub>H<sub>24</sub>O<sub>2</sub>SiNa = 311.1443; found 311.1438.

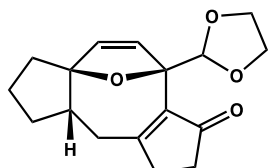

**13c:** C<sub>17</sub>H<sub>20</sub>O<sub>4</sub>  
MW: 288.34

**Product 13c:** Following the general procedure, **13c** was synthesized from **12c** (146 mg, 0.50 mmol). The reaction mixture was irradiated at 35 °C for 18 h. Following addition of Et<sub>3</sub>N, the resulting solution was heated to 80 °C for 20 h. The resulting crude residue was purified by flash chromatography (neutralized SiO<sub>2</sub>; 9:1 hexanes/acetone) to afford **13c** (60 mg, 0.21 mmol, 41% yield) as a colorless solid: **mp** = 123–125 °C; **<sup>1</sup>H NMR** (400 MHz, CDCl<sub>3</sub>) δ 6.32 (d, *J* = 0.8, 1H), 6.09 (d, *J* = 6.1, 5.8 1H), 5.78 (d, *J* = 5.8, 1H) 4.13–4.10 (m, 1H), 4.05–3.92 (m, 3H), 2.58–2.51 (m, 3H), 2.47–2.24 (m, 3H), 2.09 (dd, *J* = 16.4, 12.4, 1H), 1.94–1.88 (m, 2H), 1.86–1.79 (m, 2H) 1.77–1.71 (m, 1H), 1.31–1.23 (m, 1H); **<sup>13</sup>C NMR** (100 MHz, CDCl<sub>3</sub>) δ **C**: 205.9, 178.3, 142.2, 97.2, 89.6; **CH**: 128.9, 128.2, 101.3, 49.1; **CH<sub>2</sub>**: 66.2, 66.1, 49.1, 35.8, 35.1, 33.5, 32.9, 28.4, 20.3; **IR** (thin film): 1689, 1560 cm<sup>-1</sup>; **HRMS-ESI** (m/z) [M+Na]<sup>+</sup> calculated for C<sub>17</sub>H<sub>20</sub>O<sub>4</sub>Na = 311.1259; found 311.1254.

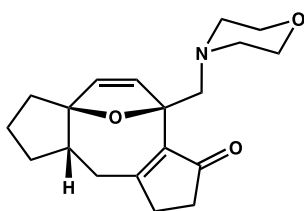

**13d:** C<sub>19</sub>H<sub>25</sub>NO<sub>3</sub>  
MW: 315.41

**Product 13d:** Following the general procedure, **13d** was synthesized from **12d** (316 mg, 1.00 mmol). The reaction mixture was irradiated at 35 °C for 10 h. Following addition of Et<sub>3</sub>N, the resulting solution was heated to 80 °C for 5 h. The resulting crude residue was purified by flash chromatography (neutralized SiO<sub>2</sub>; 4:1 hexanes/acetone) to afford **13d** (190 mg, 0.60 mmol, 60% yield) as a pink solid: **mp** = 86–88 °C; **<sup>1</sup>H NMR** (400 MHz, CDCl<sub>3</sub>) δ 5.98 (d, *J* = 5.8, 1H), 5.74 (d, *J* = 5.8, 1H), 3.67–3.58 (m, 4H), 3.39 (d, *J* = 14.4, 1H), 3.14 (d, *J* = 14.4, 1H), 2.76–2.73 (m, 2H), 2.59–2.47 (m, 5H), 2.43–2.35 (m, 1H), 2.28–2.07 (m, 3H), 1.86–1.83 (m, 4H), 1.76–1.70 (m, 1H), 1.29–1.24 (m, 1H); **<sup>13</sup>C NMR** (100 MHz, CDCl<sub>3</sub>) **C**: 206.4, 176.8, 143.2, 96.9, 89.5; **CH**: 131.2, 127.8, 48.9; **CH<sub>2</sub>**: 67.2, 60.0, 55.4, 36.1, 35.4, 33.8, 32.5, 28.4, 20.4; **IR** (thin film): 1690, 1591 cm<sup>-1</sup>; **HRMS-ESI** (m/z) [M+H]<sup>+</sup> calculated for C<sub>19</sub>H<sub>26</sub>O<sub>3</sub> = 316.1913; found 316.1903.

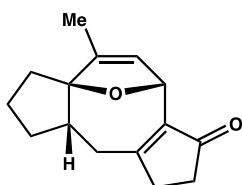

**13e:** C<sub>15</sub>H<sub>18</sub>O<sub>2</sub>  
MW: 230.31

**Product 13e:** Following a variation of the general procedure employing *n*-BuOH in place of MeCN, **13e** was synthesized from **12e** (115 mg, 0.50 mmol). The reaction mixture was irradiated at 35 °C for 12 h. Following addition of Et<sub>3</sub>N, the resulting solution was heated to 100 °C for 1 h. The resulting crude residue was purified by flash chromatography (neutralized SiO<sub>2</sub>; 9:1 hexanes/acetone) to afford **13e** (65 mg, 0.28 mmol, 57% yield) as yellow oil: **<sup>1</sup>H NMR** (400 MHz, CDCl<sub>3</sub>) δ 5.56 (d, *J* = 1.2, 1H), 5.25 (br s, 1H), 2.54–2.48 (m, 3H), 2.41–2.18 (m, 4H), 2.06–2.00 (m, 1H), 2.00–1.91 (m, 3H), 1.87 (s, 3H), 1.80–1.71 (m, 1H), 1.44–1.35 (m, 1H); **<sup>13</sup>C NMR** (100 MHz, CDCl<sub>3</sub>) δ **C**: 209.8, 176.3, 143.4, 139.5, 97.3; **CH**: 125.1, 73.2, 50.3; **CH<sub>2</sub>**: 34.5, 34.2, 32.9, 32.0, 29.9, 20.5; **CH<sub>3</sub>**: 12.7 (s, 3H); **IR** (thin film): 1689, 1625 cm<sup>-1</sup>; **HRMS-ESI** (m/z) [M+Na]<sup>+</sup> calculated for C<sub>15</sub>H<sub>18</sub>O<sub>2</sub>Na = 253.1205; found 253.1201.

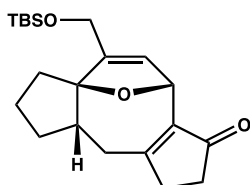

**13f:** C<sub>21</sub>H<sub>32</sub>O<sub>3</sub>Si  
MW: 360.57

**Product 13f:** Following a variation of the general procedure employing *n*-BuOH in place of MeCN, **13f** was synthesized from **12f** (120 mg, 0.33 mmol). The reaction mixture was irradiated at 35 °C for 12 h. Following addition of Et<sub>3</sub>N, the resulting solution was heated to 100 °C for 8 h. The resulting crude residue was purified by flash chromatography (neutralized SiO<sub>2</sub>; 4:1 hexanes/EtOAc) to afford **13f** (51 mg, 0.14 mmol, 43% yield) as colorless solid: **mp** = 98–99 °C; **<sup>1</sup>H NMR** (400 MHz, CDCl<sub>3</sub>) δ 5.86 (d, *J* = 1.5, 1H), 5.35 (br s, 1H), 4.33 (s, 2H) 2.54 (t, *J* = 4.6, 2H), 2.50–2.47 (m, 1H), 2.44–2.27 (m, 4H), 2.09–1.87 (m, 4H), 1.75–1.65 (m, 1H), 1.47–1.39 (m, 1H), 0.91 (s, 9H), 0.08 (s, 6H); **<sup>13</sup>C NMR** (100 MHz, CDCl<sub>3</sub>) **C**: 206.7, 176.4, 144.1, 142.9, 96.8, 18.3; **CH**: 125.9, 73.3, 50.2; **CH<sub>2</sub>**: 58.9, 34.5, 34.1,

33.3, 32.1, 29.2, 20.3; **CH<sub>3</sub>**: 25.9, -5.4, -5.5; **IR (thin film)**: 1692, 1606 cm<sup>-1</sup>; **HRMS-ESI (m/z) [M+Na]<sup>+</sup>** calculated for C<sub>21</sub>H<sub>32</sub>O<sub>3</sub>SiNa = 383.2018; found 383.2015.

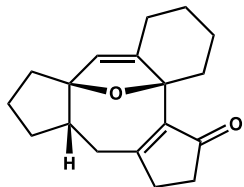

**13g**: C<sub>18</sub>H<sub>22</sub>O<sub>2</sub>  
MW: 270.37

**Product 13g**: Following the general procedure, **13g** was synthesized from **12g** (135 mg, 0.50 mmol). The reaction mixture was irradiated at 35 °C for 20 h. Following addition of Et<sub>3</sub>N, the resulting solution was heated to 80 °C for 1 h. The resulting crude residue was purified by flash chromatography (neutralized SiO<sub>2</sub>; 97:3 CH<sub>2</sub>Cl<sub>2</sub>/Et<sub>2</sub>O) to afford **13g** (34.0 mg, 0.126 mmol, 25% yield of the major diastereomer, d.r. = 10:1) as a colorless solid: **mp** = 120–124 °C **<sup>1</sup>H NMR** (400 MHz, CDCl<sub>3</sub>) δ 5.52 (s, 1H), 3.18 (d, *J* = 12.4, 1H), 2.53–2.51 (m, 2H), 2.47–2.42 (m, 2H), 2.36–2.26 (m, 3H), 2.00–1.92 (m, 1H), 1.90–1.56 (m, 9H), 1.39 (td, *J* = 12.6, 4.1, 1H), 1.33–1.15 (m, 2H); **<sup>13</sup>C NMR** (100 MHz, CDCl<sub>3</sub>) δ **C**: 206.6, 179.6, 143.2, 141.7, 95.3, 84.5; **CH**: 119.7, 46.6; **CH<sub>2</sub>**: 35.6, 35.5, 35.0, 34.2, 32.7, 28.4, 26.8, 26.4, 23.6, 19.8; **IR (thin film)**: 1681, 1590 cm<sup>-1</sup>; **HRMS-ESI (m/z) [M+Na]<sup>+</sup>** calculated for C<sub>18</sub>H<sub>22</sub>O<sub>2</sub>Na = 293.1512; found 293.1518. Relative stereochemistry of the major diastereomer was established by single crystal X-ray diffraction (CCDC entry 1816389).<sup>12</sup>

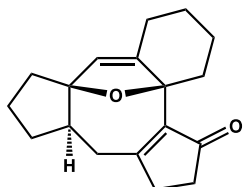

**S14**: C<sub>18</sub>H<sub>22</sub>O<sub>2</sub>  
MW: 270.37

**Diastereomer S14**: Following a variation of the general procedure employing *n*-BuOH in place of MeCN, **S14** was synthesized from **12g** (61.0 mg, 0.23 mmol). The reaction mixture was irradiated at 35 °C for 20 h. Following addition of Et<sub>3</sub>N, the resulting solution was heated to 100 °C for 2 h. The resulting crude residue was purified by flash chromatography (neutralized SiO<sub>2</sub>; 9:1 Hexanes/EtOAc) to afford **S14** (16 mg, 0.06 mmol, 26% yield) as a colorless solid: **<sup>1</sup>H NMR** (400 MHz, CDCl<sub>3</sub>) δ 5.39 (s, 1H), 2.91 (dd, *J* = 16.1, 9.6, 1H), 2.52–2.39 (m, 2H), 2.37–2.31 (m, 2H), 2.10–2.00 (m, 3H), 1.90–1.75 (m, 5H), 1.67–1.61 (m, 1H), 1.60–1.51 (m, 1H), 1.44–1.38 (m, 1H), 1.33–1.23 (m, 1H); **<sup>13</sup>C NMR** (150 MHz, CDCl<sub>3</sub>) δ **C**: 207.2, 176.7, 146.7, 145.3, 94.6, 86.9; **CH**: 125.3, 45.9; **CH<sub>2</sub>**: 38.8, 36.7, 36.4, 35.8, 32.7, 32.5, 26.6, 25.8, 23.7, 22.3; **IR (thin film)**: 1692, 1606 cm<sup>-1</sup>; **HRMS-ESI (m/z) [M+Na]<sup>+</sup>** calculated for C<sub>18</sub>H<sub>22</sub>O<sub>2</sub>Na = 293.1518; found 293.1511. Relative stereochemistry was established by single crystal X-ray diffraction (CCDC entry 1816384).<sup>12</sup>

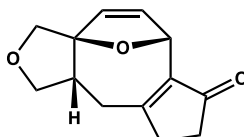

**13h**: C<sub>13</sub>H<sub>14</sub>O<sub>3</sub>  
MW: 218.25

**Product 13h**: Following a variation of the general procedure employing *n*-BuOH in place of MeCN, **13h** was synthesized from **12h** (114 mg, 0.50 mmol). The reaction mixture was irradiated at 35 °C for 42 h. Following addition of Et<sub>3</sub>N, the resulting solution was heated to 100 °C for 1 h. The resulting crude residue was purified by flash chromatography (neutralized SiO<sub>2</sub>; 1:9 hexanes/MTBE) to afford **13h** (25.0 mg, 0.110 mmol, 22% yield) as a white foam: **<sup>1</sup>H NMR** (400 MHz, CDCl<sub>3</sub>) δ 6.23 (d, *J* = 5.8, 1H), 6.00 (d, *J* = 5.2, 1H), 5.51 (br s, 1H), 4.08 (t, *J* = 8.2, 1H), 3.90 (d, *J* = 8.5, 1H), 3.83 (d, *J* = 8.5, 1H), 3.51 (dd, *J* = 11.6, 8.5, 1H), 2.64–2.56 (m, 3H), 2.53–2.48 (m, 1H), 2.45–2.29 (m, 2H), 2.23 (dd, *J* = 15.5, 13.0, 1H); **<sup>13</sup>C NMR** (100 MHz, CDCl<sub>3</sub>) **C**: 206.4, 174.5, 142.0, 94.0; **CH**: 130.3, 127.8, 75.2, 48.4; **CH<sub>2</sub>**: 72.2, 70.9, 34.3, 32.2, 30.4; **IR (thin film)**: 1686, 1621 cm<sup>-1</sup>; **HRMS-DART (m/z) [M+H]<sup>+</sup>** calculated for C<sub>13</sub>H<sub>15</sub>O<sub>3</sub> = 219.1016; found 219.1013.

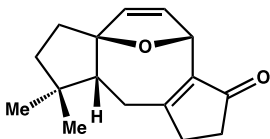

**13i**: C<sub>16</sub>H<sub>20</sub>O<sub>2</sub>  
MW: 244.33

**Product 13i**: Following a variation of the general procedure employing *n*-BuOH in place of MeCN, **13i** was synthesized from **12i** (67 mg, 0.27 mmol). The reaction mixture was irradiated at 35 °C for 9 h. Following addition of Et<sub>3</sub>N, the resulting solution was heated to 100 °C for 9 h. The resulting crude residue was purified by flash chromatography (neutralized SiO<sub>2</sub>; 4:1 hexanes/EtOAc) to afford **13i** (27 mg, 0.11 mmol, 40% yield) as a white solid: **mp** = 117–122 °C; **<sup>1</sup>H NMR** (600 MHz, CDCl<sub>3</sub>) δ 6.06 (d, *J* = 5.6, 1H), 5.88 (dd, *J* = 5.9, 2.0, 1H), 5.42 (br s, 1H), 2.59–2.56 (m, 2H), 2.40 (dq, *J* = 18.9, 6.4, 2.9, 1H), 2.34–2.21 (m, 3H), 2.00–1.95 (m, 3H), 1.77–1.72 (m, 1H), 1.57 (dt, *J* = 16.0, 7.9, 1H), 1.06 (s, 3H), 0.88 (s, 3H); **<sup>13</sup>C NMR** (100 MHz, CDCl<sub>3</sub>) **C**: 206.7, 176.6, 141.9, 97.3, 38.6; **CH**: 131.3, 128.8, 74.4, 60.1; **CH<sub>2</sub>**: 38.7, 34.5, 32.8, 32.3, 29.9; **CH<sub>3</sub>**: 30.1, 24.7; **IR (thin film)**: 1694, 1626 cm<sup>-1</sup>; **HRMS-ESI (m/z) [M+H]<sup>+</sup>** calculated for C<sub>16</sub>H<sub>21</sub>O<sub>2</sub> = 245.1536; found 245.1541.



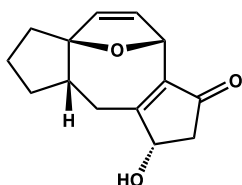

**13j:** C<sub>14</sub>H<sub>16</sub>O<sub>3</sub>  
MW: 232.28  
d.r. = 1.3:1

**Product 13j:** Following the general procedure, **13j** was synthesized from **12j** (182 mg, 0.78 mmol). The reaction mixture was irradiated at 35 °C for 6 h. Following addition of Et<sub>3</sub>N, the resulting solution was heated to 100 °C for 1 h. The resulting crude residue was purified by flash chromatography (neutralized SiO<sub>2</sub>; 1:1 hexanes/EtOAc) to afford **13i** (116 mg, 0.50 mmol, 64% combined yield, 1.3:1 mixture of diastereomers) as a white foam: **<sup>1</sup>H NMR** (600 MHz, CDCl<sub>3</sub>) major diastereomer, δ 5.84 (dd, *J* = 5.9, 1.9, 1H), 4.61 (br s, 1H), 2.55 (s, 1H); minor diastereomer, δ 5.91 (dd, *J* = 5.9, 1.9, 1H), 4.79 (br s, 1H), 2.42 (s, 1H); remaining <sup>1</sup>H resonances could not be resolved; **<sup>13</sup>C NMR** (150 MHz, CDCl<sub>3</sub>): major diastereomer, δ **C**: 203.1, 174.0, 143.0, 96.9; **CH**: 130.0, 127.7, 74.3, 71.1 49.7; **CH<sub>2</sub>**: 44.5, 33.9, 30.2, 29.0, 20.2; minor diastereomer, δ **C**: 202.5, 173.8, 143.5, 96.8; **CH**: 130.1, 128.1, 73.8, 72.3 48.9; **CH<sub>2</sub>**: 43.8, 34.0, 31.2, 29.0, 20.3; **IR** (thin film): 3424, 1702, 1690, 1635 cm<sup>-1</sup>; **HRMS-ESI** (*m/z*) [M+H]<sup>+</sup> calculated for C<sub>14</sub>H<sub>17</sub>O<sub>3</sub> = 233.1172; found 233.1179.

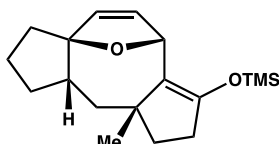

**14:** C<sub>18</sub>H<sub>28</sub>O<sub>2</sub>Si  
MW: 304.51

**Silyl enol ether 14:** CuI (2.04 g, 10.7 mmol) was added to a flame-dried flask in a glove box. The flask was sealed, removed from the glove box, and THF (68 mL) was added via syringe. The resulting slurry was cooled to 0 °C and a solution of MeLi (13.5 mL, 21.6 mmol, 1.6 M in THF) was added drop wise over 15 min. The resulting solution was cooled to -78 °C. A solution of **3**<sup>14</sup> (1.16 mg, 5.35 mmol) and TMSCl (6.7 mL, 27 mmol) in THF (37 mL) was prepared in a separate flask and then added drop wise to the cooled mixture of Me<sub>2</sub>CuLi over 1.5 h using an addition funnel. The resulting solution was maintained at -78 °C for 5 h, then the reaction was rapidly poured into a stirred suspension of Florisil (24 g) suspended in hexanes (220 mL) and Et<sub>3</sub>N (24 mL).<sup>15</sup> The resulting slurry was stirred at 0 °C for 1 h, then filtered. The filter cake was vigorously washed with hexanes (3 x 25 mL). The combined filtrate was filtered again to remove precipitate and concentrated under reduced pressure to afford **14** (1.59 g, 5.22 mmol, 98% yield) as a brown oil in >95% purity. This sensitive intermediate<sup>16</sup> was used without further purification: **<sup>1</sup>H NMR** (600 MHz, CDCl<sub>3</sub>) δ 5.98 (dd, *J* = 5.8, 2.0, 1H), 5.74 (dd, *J* = 5.8, 0.8, 1H), 5.43 (br s, 1H), 2.46–2.41 (m, 1H), 2.35–2.29 (m, 1H), 2.00 (dd, *J* = 15.2, 8.5, 1H), 1.97–1.91 (m, 1H), 1.86–1.79 (m, 1H), 1.77–1.62 (m, 3H), 1.55–1.49 (m, 2H), 1.39 (dd, *J* = 13.4, 3.5, 1H), 1.34 (d, *J* = 11.9, 1H), 1.17 (s, 3H), 1.15–1.08 (m, 1H), 0.18 (s, 9H); **<sup>13</sup>C NMR** (150 MHz, CDCl<sub>3</sub>) δ **C**: 144.2, 126.2, 97.2, 47.0; **CH**: 132.4, 128.4, 79.7, 46.4; **CH<sub>2</sub>**: 41.5, 39.6, 33.9, 31.6, 27.3, 19.8; **CH<sub>3</sub>**: 24.9, 0.6.

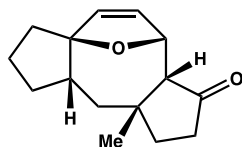

**15:** C<sub>15</sub>H<sub>20</sub>O<sub>2</sub>  
MW: 232.32

**Ketone 15:** A solution of unpurified silyl enol ether **14** (1.15 g, 3.78 mmol) in THF (13 mL) was treated with 1 M aq. HCl (7.6 mL). The resulting slurry was stirred at rt for 1 h, then transferred to a separatory funnel and extracted with EtOAc (4 x 15 mL). The combined organic extracts were washed with water (25 mL) and brine (25 mL), dried over MgSO<sub>4</sub>, filtered, and concentrated under reduced pressure to afford **15** (871 mg, 3.75 mmol, 99% yield) as a colorless solid. No further purification was required: **mp** = 89–91 °C; **<sup>1</sup>H NMR** (600 MHz, CDCl<sub>3</sub>) δ 6.20 (dd, *J* = 6.0, 1.5, 1H), 5.82 (d, *J* = 6.1, 1H), 5.13 (d, *J* = 8.2, 1H), 2.70 (d, *J* = 8.1, 1H), 2.39–2.33 (m, 1H), 2.23 (dd, *J* = 10.5, 5.9, 2H), 1.91–1.85 (m, 2H), 1.77–1.71 (m, 4H), 1.65–1.60 (m, 2H), 1.38 (s, 3H), 1.28 (dd, *J* = 13.9, 2.4, 1H), 1.10–1.02 (m, 1H); **<sup>13</sup>C NMR** (150 MHz, CDCl<sub>3</sub>) δ **C**: 220.3, 97.6, 44.8; **CH**: 132.0, 131.4, 82.2, 63.8, 46.4; **CH<sub>2</sub>**: 38.7, 38.4, 37.4, 32.8, 27.0, 20.3; **CH<sub>3</sub>**: 30.9; **IR** (thin film): 1725 cm<sup>-1</sup>; **HRMS-ESI** (*m/z*) [M+H]<sup>+</sup> calculated for C<sub>15</sub>H<sub>21</sub>O<sub>2</sub> = 233.1542; found 233.1548. Relative stereochemistry was established by single crystal X-ray diffraction (CCDC entry 1816387).<sup>12</sup>

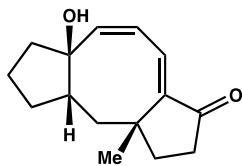

**16:** C<sub>15</sub>H<sub>20</sub>O<sub>2</sub>  
MW: 232.32

**Dieneone 16:** A solution of unpurified silyl enol ether **14** (375 mg, 1.23 mmol) in CH<sub>2</sub>Cl<sub>2</sub> (6 mL) was added drop wise over 25 min to a solution of BCl<sub>3</sub> (2.5 mL, 2.5 mmol, 1.0 M in heptane) in CH<sub>2</sub>Cl<sub>2</sub> (6 mL) maintained at -78 °C. After 30 min, Et<sub>3</sub>N (35 mL) followed by MeOH (35 mL) was added via syringe at -78 °C. The reaction mixture was warmed to rt and concentrated under reduced pressure. The resulting oil was diluted with CH<sub>2</sub>Cl<sub>2</sub> (15 mL) and washed with H<sub>2</sub>O (20 mL). The aqueous layer was then extracted with CH<sub>2</sub>Cl<sub>2</sub> (4 x 10 mL). The combined organic extracts were dried over MgSO<sub>4</sub>, filtered, and concentrated under reduced pressure. The resulting crude residue was purified by flash chromatography (SiO<sub>2</sub>; 6:1 hexanes/acetone) to afford **16** (170 mg, 0.73 mmol, 60% yield) as a yellow solid: **mp** = 110–111 °C; **<sup>1</sup>H NMR** (600 MHz, CDCl<sub>3</sub>) δ 6.56 (d, *J* = 6.2, 1H), 6.06 (dd, *J* = 12.2, 6.3, 1H), 5.91 (d, *J* = 12.2, 1H), 2.52–



2.45 (m, 1H), 2.45–2.39 (m, 1H) 2.23 (ddd,  $J = 19.2, 8.5, 1.7$ , 1H), 2.06 (br. s, 1H), 1.90–1.80 (m, 4H), 1.76–1.65 (m, 4H), 1.65–1.55 (m, 1H), 1.29 (s, 3H), 1.27–1.20 (m, 1H);  $^{13}\text{C}$  NMR (150 MHz,  $\text{CDCl}_3$ )  $\delta$  C: 208.5, 149.0, 82.3, 43.4; CH: 141.8, 125.2, 125.1, 46.5;  $\text{CH}_2$ : 42.6, 39.6, 37.3, 34.2, 30.6, 20.3;  $\text{CH}_3$ : 23.3; IR (thin film): 3546, 1715, 1632  $\text{cm}^{-1}$ ; HRMS-ESI (m/z)  $[\text{M}+\text{Na}]^+$  calculated for  $\text{C}_{15}\text{H}_{20}\text{O}_2\text{Na} = 255.1361$ ; found 255.1361. Relative stereochemistry was established by single crystal X-ray diffraction (CCDC entry 1816385).<sup>12</sup>

**Preparation of *N*-tert-butylbenzenesulfinimidoyl chloride:** Following a modification of the procedure reported by Mukiayama,<sup>1</sup> *S*-phenylthioacetate (2.0 mL, 15 mmol) was added drop wise to a solution *N,N*-dichloro-2-methylpropan-2-amine (2.69 g, 19 mmol) in benzene (6.5 mL) at rt. The resulting yellow solution was warmed to 80 °C during which time gas evolution occurred and the solution became red. After 2 h, the reaction mixture was concentrated under reduced pressure with care to minimize exposure to atmosphere. The resulting orange residue (3.85 g, 15 mmol, 100% yield) was analyzed for purity using  $^1\text{H}$  NMR (>95% purity) and then digested in benzene (7.5 mL) to make a 2 M solution. The resultant orange solution was stable for ca. 1 week when stored under an  $\text{N}_2$  atmosphere at rt:  $^1\text{H}$  NMR (400 MHz,  $\text{C}_6\text{D}_6$ )  $\delta$  7.92–7.88 (m, 2H), 6.94–6.90 (m, 3H), 1.38 (s, 9H). All other characterization data was identical to previously reported values.<sup>1</sup>

**IMPORTANT:** In early iterations of our chemistry we attempted to use commercially available *N*-tert-butylbenzenesulfinimidoyl chloride. This material resulted in low yield of the resultant photoproducts **12** and invariably arrived in low purity (ca. 50% purity by  $^1\text{H}$  NMR). The use of oxidant prepared as described above was *critical* to achieve the yields reported in this manuscript.

### 3. $^1\text{H}$ NMR Experiment: Photoequilibration of (*E*)-4 [see, Scheme 3A].

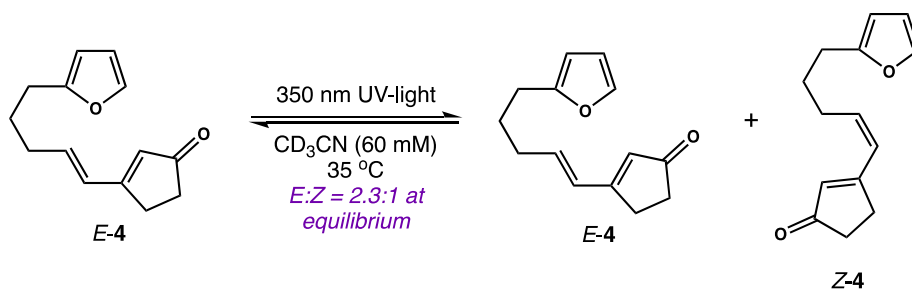

| Time (min) | <i>E:Z</i> ratio by $^1\text{H}$ NMR |
|------------|--------------------------------------|
| 0          | 100:0                                |
| 5          | 3:1                                  |
| <b>10</b>  | <b>2.2:1</b>                         |
| 15         | 2.2:1                                |
| 20         | 2.2:1                                |

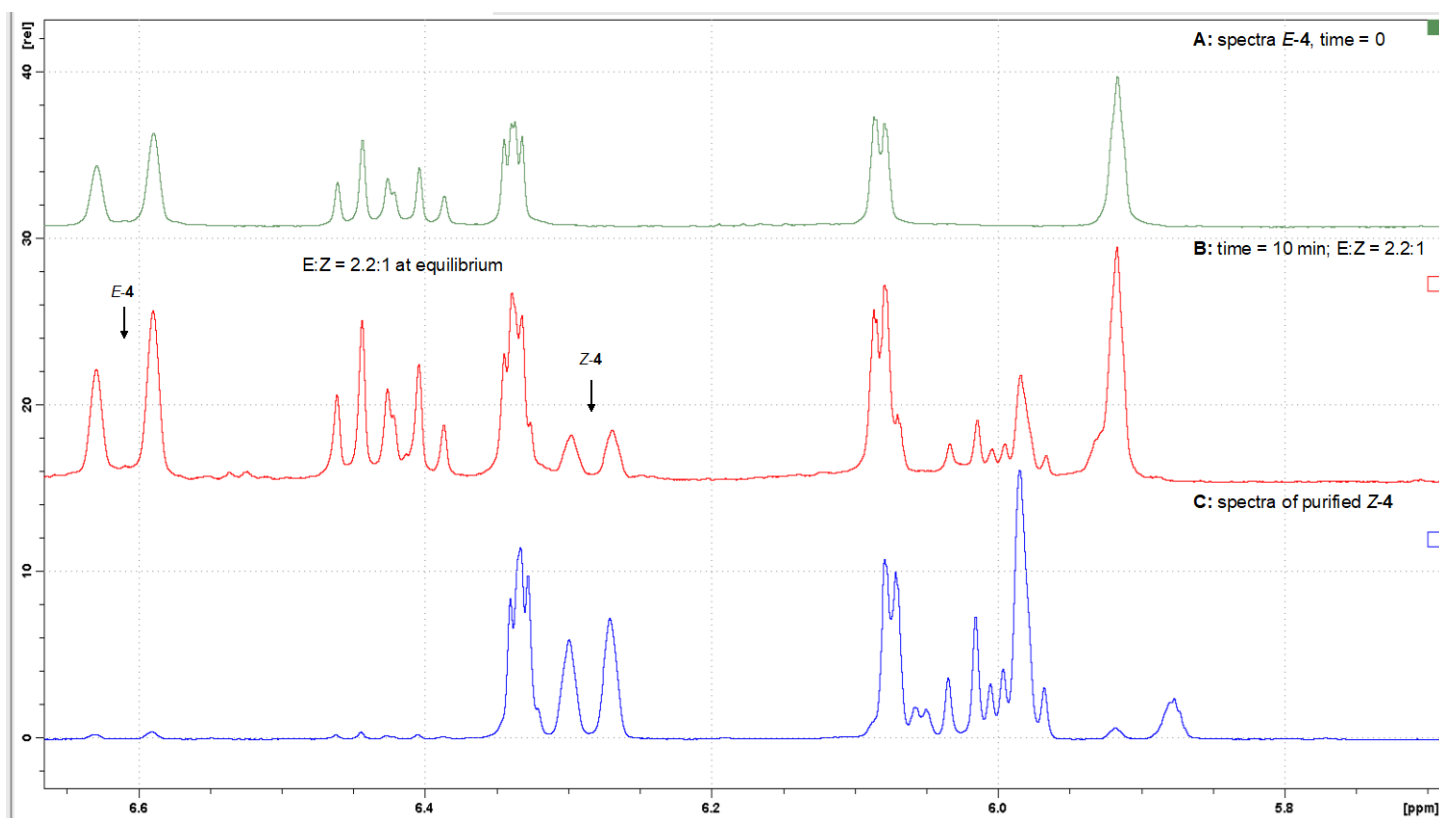

**Procedure & Analysis:** An NMR tube was charged with a solution of *E*-4 (6.5 mg, 0.04 mmol) in  $\text{CD}_3\text{CN}$  (0.45 mL). A  $^1\text{H}$  NMR spectra of the reaction mixture was obtained under ambient conditions (panel **A**, above). The reaction mixture was then exposed to 350 nm UV-light at 35 °C in a Rayonet photoreactor. The reaction mixture was analyzed by  $^1\text{H}$  NMR in five-minute intervals. Equilibrium was established after 10 min (panel **B**). Results were compared to  $^1\text{H}$  NMR spectra of independently prepared *Z*-4 (panel **C**) in  $\text{CD}_3\text{CN}$ . We observed an equilibrium ratio of 2.3:1 under these conditions.

#### 4. $^1\text{H}$ NMR Experiment: Photoequilibration of (*Z*)-4

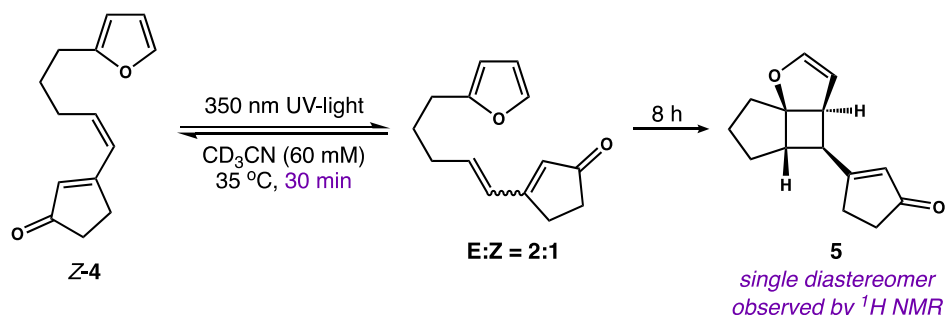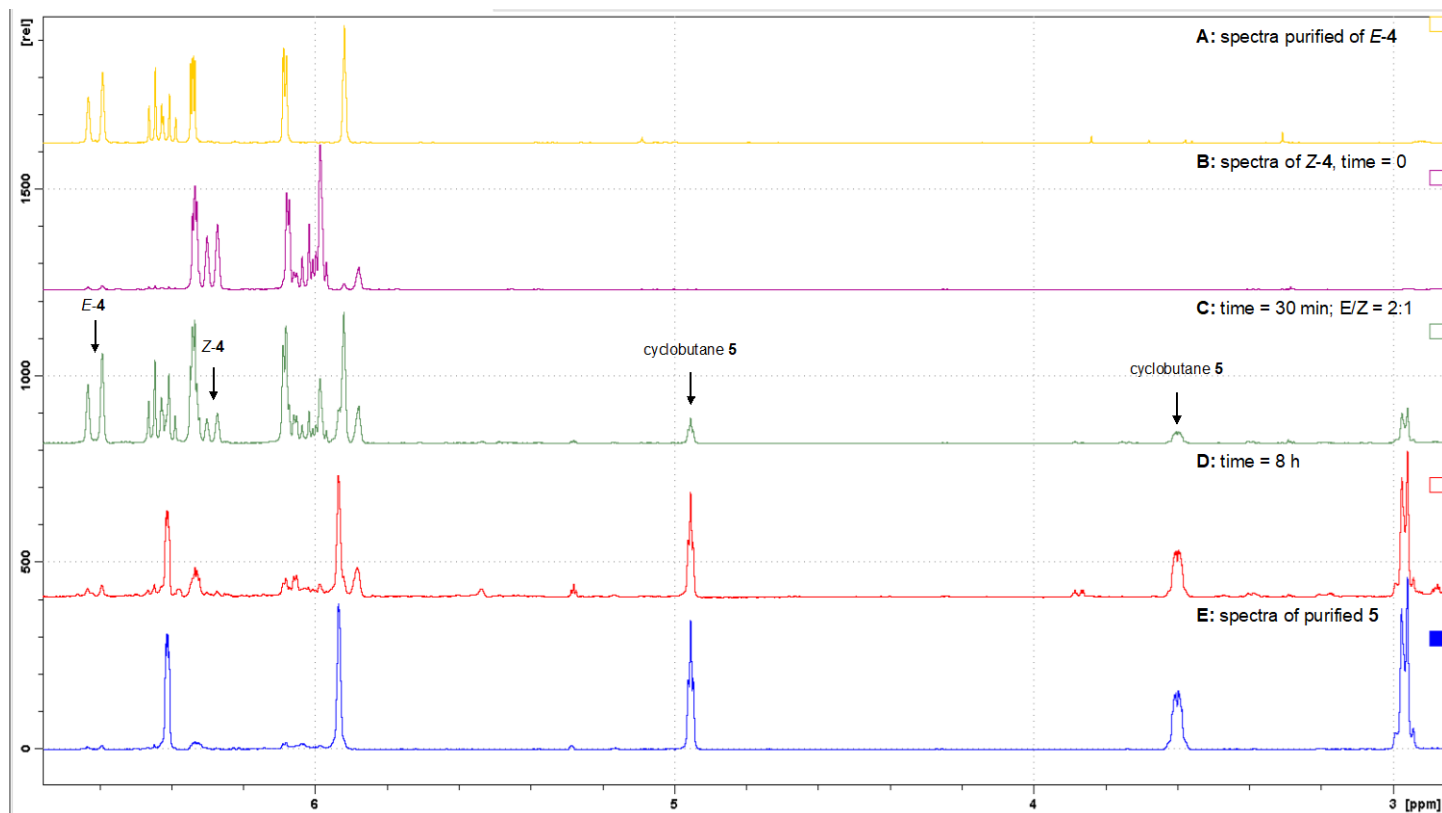

**Procedure & Analysis:** An NMR tube was charged with a solution of *Z*-4 (6.5 mg, 0.04 mmol) in  $\text{CD}_3\text{CN}$  (0.45 mL). A  $^1\text{H}$  NMR spectra of the reaction mixture was obtained under ambient conditions (panel B, above). The reaction mixture was then exposed to 350 nm UV-light at 35 °C in a Rayonet photoreactor. The unpurified reaction was analyzed by NMR after 30 min (panel C) and 8 h (panel D). Results were compared to  $^1\text{H}$  NMR spectra of purified *E*-4 (panel A) and 5 (panel E) in  $\text{CD}_3\text{CN}$ , respectively. We observed that *Z*-4 readily equilibrated to a 2:1 mixture of *E*/*Z*-4 within 30 min. During this time we also observed formation of 5. The resulting equilibrium mixture of 4 slowly reacted to form 5 over the course of 8 h. This reaction proved to be highly stereoselective as product 5 was the only diastereomer observed.

## 5. $^1\text{H}$ NMR Experiment: Photodecomposition of **5** [see, Scheme 3B].

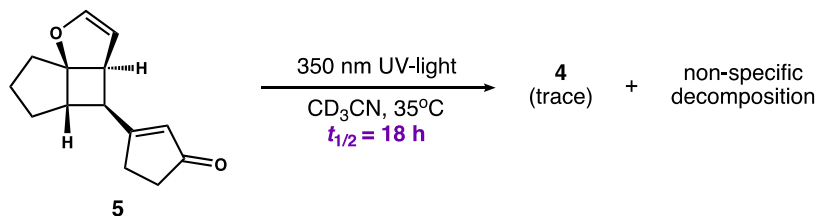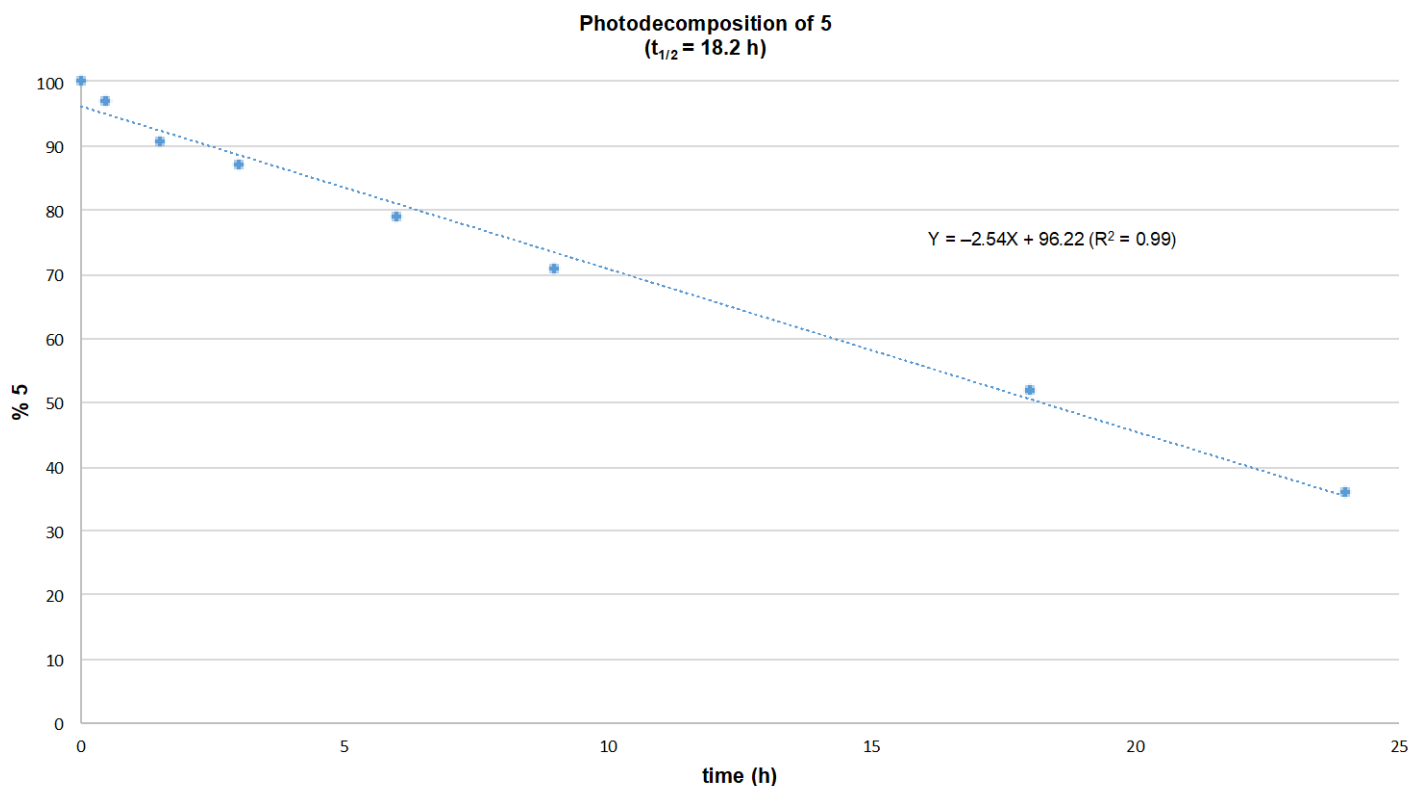

**Procedure & Analysis:** An NMR tube was charged with a solution of **5** (6.5 mg, 0.04 mmol) and *N*-benzylbenzamide (8.5 mg, 0.04 mmol, **internal standard**) in  $\text{CD}_3\text{CN}$  (0.45 mL). A  $^1\text{H}$  NMR spectra of the reaction mixture was obtained under ambient conditions (time = 0, 100% **5**). The reaction mixture was then exposed to 350 nm UV-light at 35 °C in a Rayonet. Photodecomposition was determined by integration of **5** relative to an *N*-benzylbenzamide as an internal standard at various time points over a 24 period (see above). We determined a half-life ( $t_{1/2}$ ) of 18.2 h for **5** under these reaction conditions.



## 6. $^1\text{H}$ NMR Experiment: Thermal isomerization of **5** to **3** [see, Scheme 3C].

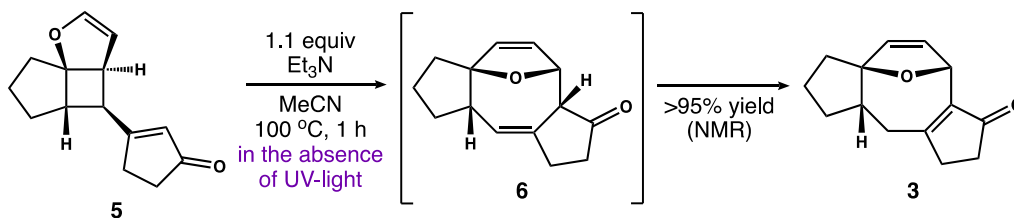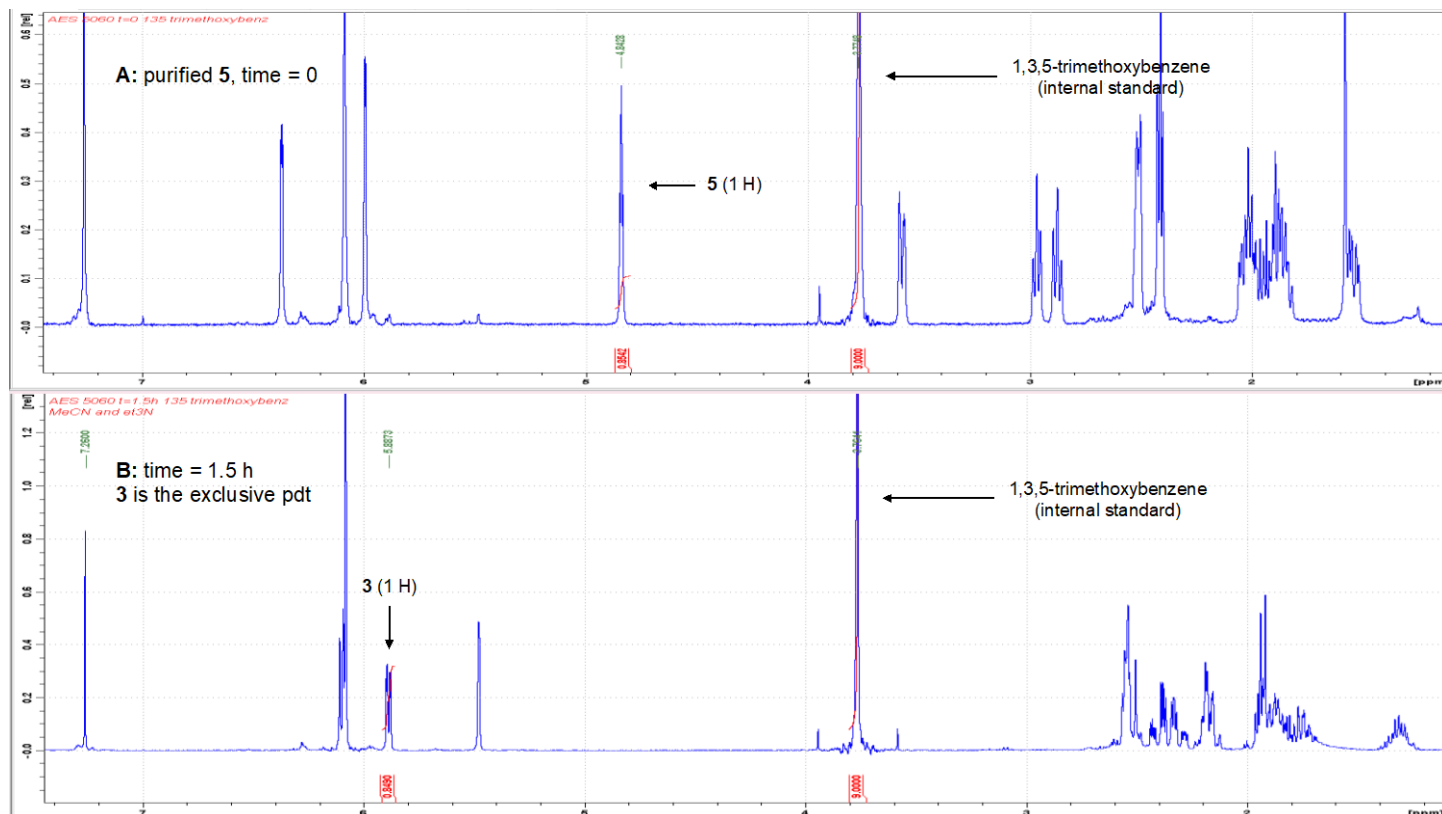

**Procedure & Analysis:** An NMR tube was charged with a solution of **5** (11 mg, 0.05 mmol) and 1,3,5-trimethoxybenzene (8.4 mg, 0.05 mmol, **internal standard**) in  $\text{CH}_3\text{CN}$  (0.8 mL). A  $^1\text{H}$  NMR spectra of the reaction mixture was obtained under ambient conditions (400 MHz,  $\text{CDCl}_3$ , time = 0, 100% **5**, panel **A** above).  $\text{Et}_3\text{N}$  (0.01 mL, 0.06 mmol) was added and the reaction mixture was heated at  $100\text{ }^\circ\text{C}$ . After 1.5 h, the unpurified reaction mixture was analyzed by  $^1\text{H}$  NMR (400 MHz,  $\text{CDCl}_3$ , panel **B**). We observed >95% NMR yield of **3**.

## 7. <sup>1</sup>H NMR Experiment: NMR yield for **13g** [Figure 1].

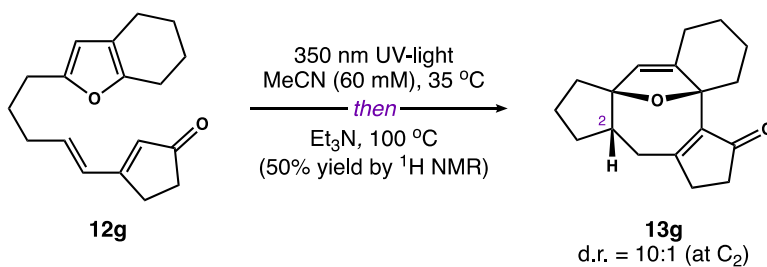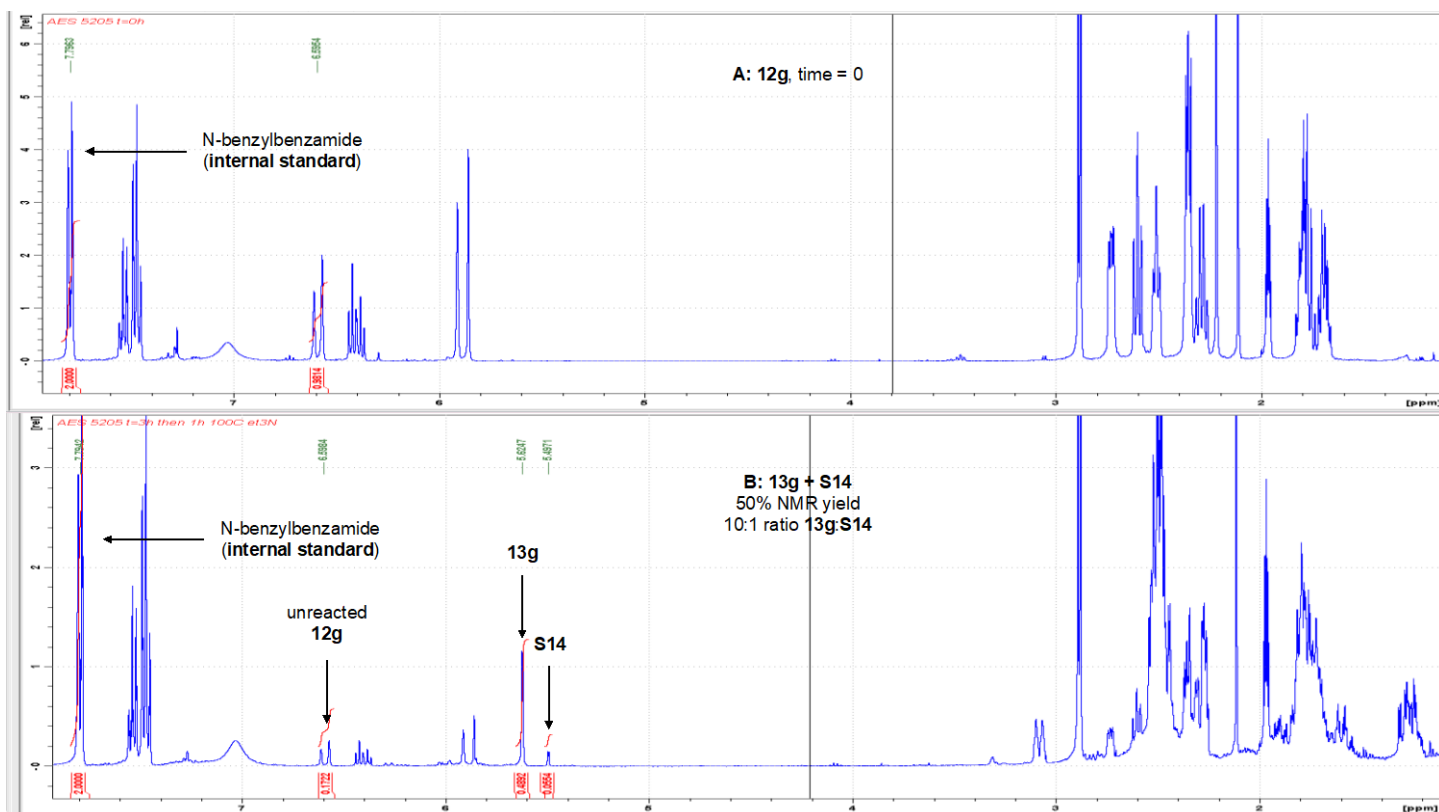

**Procedure & Analysis:** A quartz round-bottom flask was charged with a solution of **12g** (54 mg, 0.2 mmol) and N-benzylbenzamide (27 mg, 0.2 mmol, **internal standard**). An aliquot was taken via syringe to collect a <sup>1</sup>H NMR spectra under ambient conditions (400 MHz, CDCl<sub>3</sub>, time = 0, 100% **12g**, panel **A** above). The reaction mixture was exposed to UV-light ( $h\nu = 350$  nm) at 35 °C in a Rayonet. After 20 h, the reaction was removed from UV-light, cooled to rt, and treated with Et<sub>3</sub>N (0.3 mL, 0.2 mmol). The reaction was heated to 100 °C. After 1 h, the reaction was cooled to rt. An aliquot was concentrated and analyzed by <sup>1</sup>H NMR (400 MHz, CDCl<sub>3</sub>, panel **B**). This experiment established that **13g** was formed in 50% yield (by NMR) as a 10:1 mixture of diastereomers at C<sub>2</sub>.

NMR yield for **13i** [Figure 1].

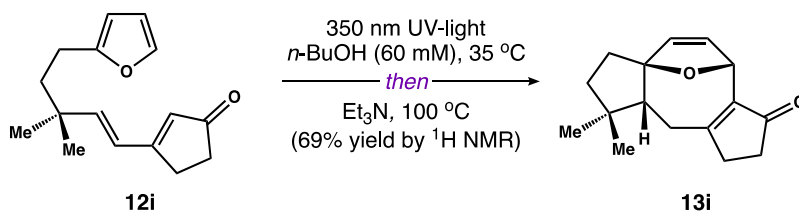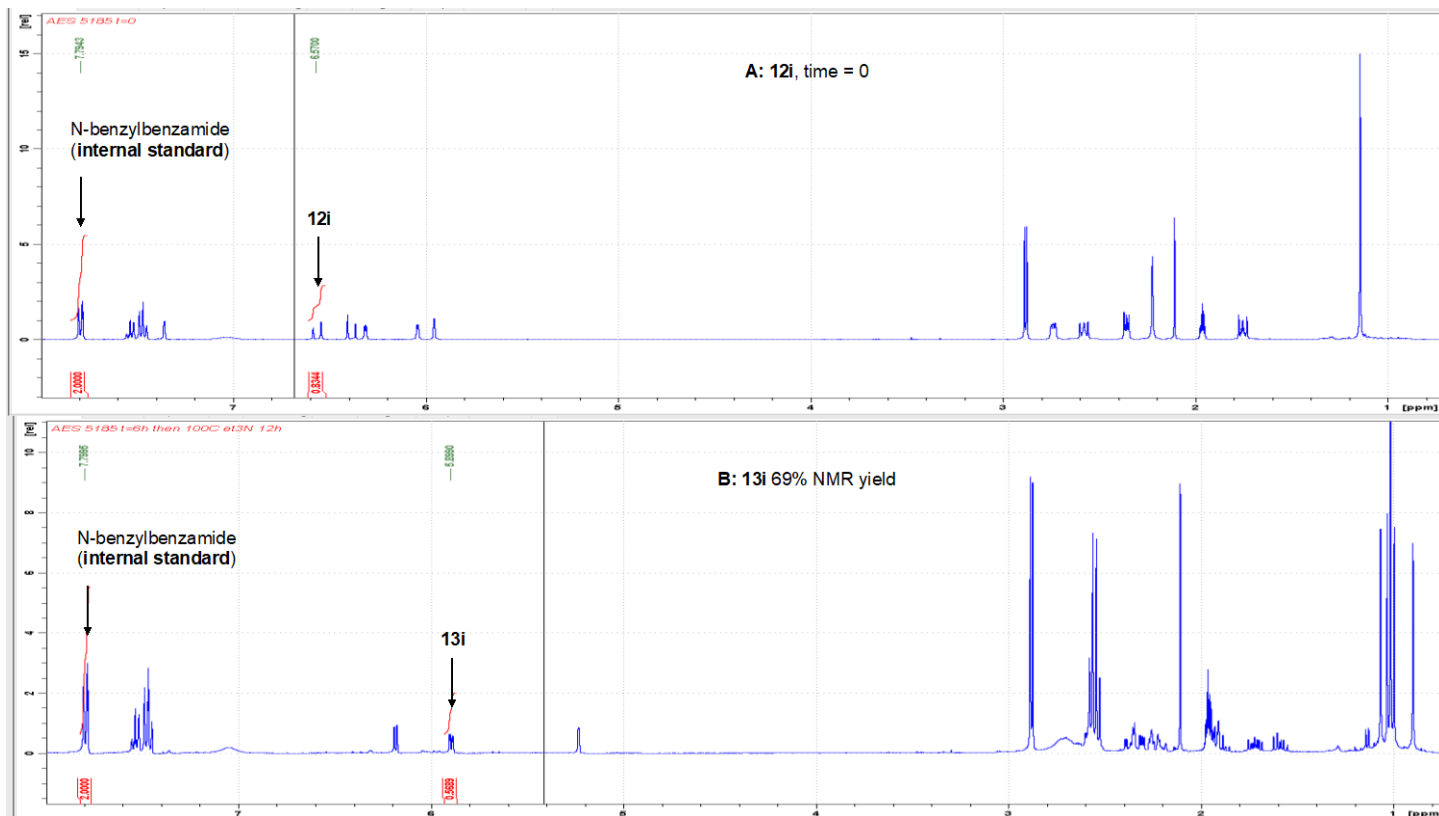

**Procedure & Analysis:** A quartz round-bottom flask was charged with a solution of **12i** (49 mg, 0.2 mmol) and N-benzylbenzamide (27 mg, 0.2 mmol, **internal standard**) in *n*-BuOH (3.3 mL). An aliquot was taken via syringe to collect a <sup>1</sup>H NMR spectra under ambient conditions (400 MHz, CDCl<sub>3</sub>, time = 0, 100% **12i**, panel **A** above). The reaction mixture was exposed to UV-light ( $h\nu = 350$  nm) at 35 °C in a Rayonet. After 9 h, the reaction was removed from UV-light, cooled to rt, and treated with Et<sub>3</sub>N (0.3 mL, 0.2 mmol). The reaction was heated to 100 °C. After 9 h, the reaction was cooled to rt. An aliquot was concentrated and analyzed by <sup>1</sup>H NMR (400 MHz, CDCl<sub>3</sub>, panel **B**). This experiment established that **13i** was formed in 69% yield (by NMR).

NMR yield for **13j** [Figure 1].

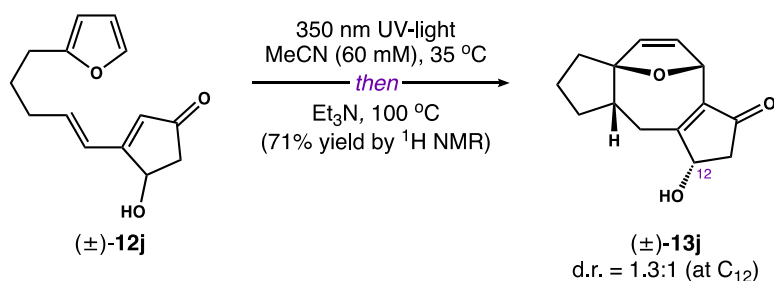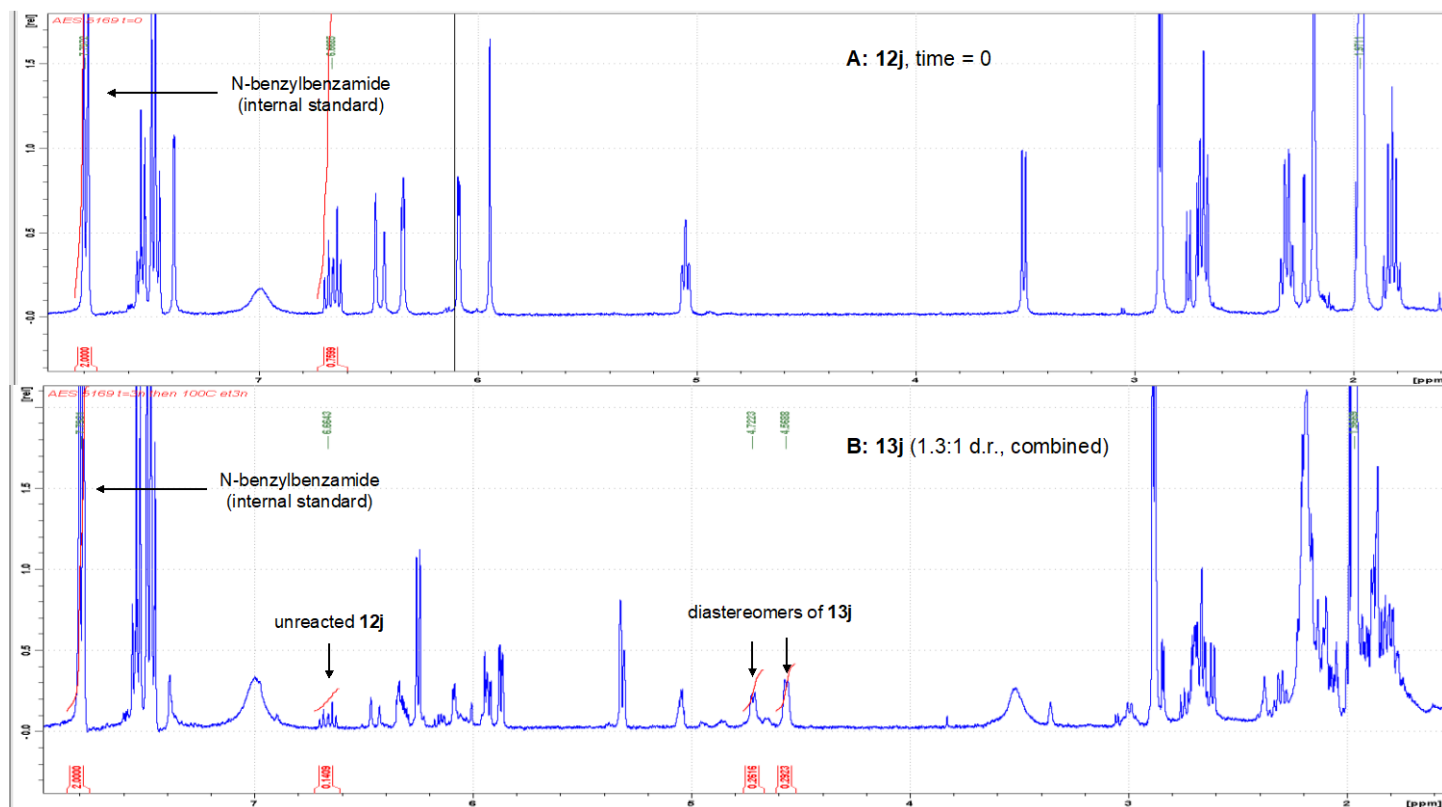

**Procedure & Analysis:** A quartz round-bottom flask was charged with a solution of **12j** (46 mg, 0.2 mmol) and N-benzylbenzamide (27 mg, 0.2 mmol, **internal standard**). An aliquot was taken via syringe to collect a <sup>1</sup>H NMR spectra under ambient conditions (400 MHz, CDCl<sub>3</sub>, time = 0, 100% **12j**, panel **A** above). The reaction mixture was exposed to UV-light ( $h\nu = 350$  nm) at 35 °C in a Rayonet. After 6 h, the reaction was removed from UV-light, cooled to rt, and treated with Et<sub>3</sub>N (0.3 mL, 0.2 mmol). The reaction was heated to 100 °C. After 1 h, the reaction was cooled to rt. An aliquot was concentrated and analyzed by <sup>1</sup>H NMR (400 MHz, CDCl<sub>3</sub>, panel **B**). This experiment established that **13j** was formed in 71% yield (by NMR) as a 1.3:1 mixture of diastereomers at C<sub>12</sub>.



NMR yield for **13h** [Figure 1].

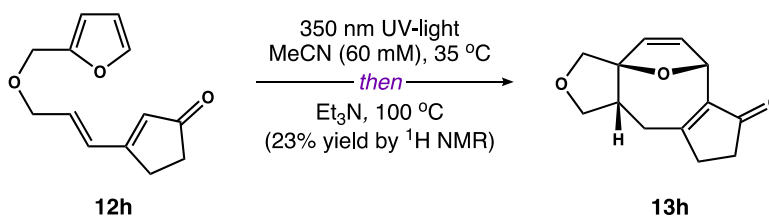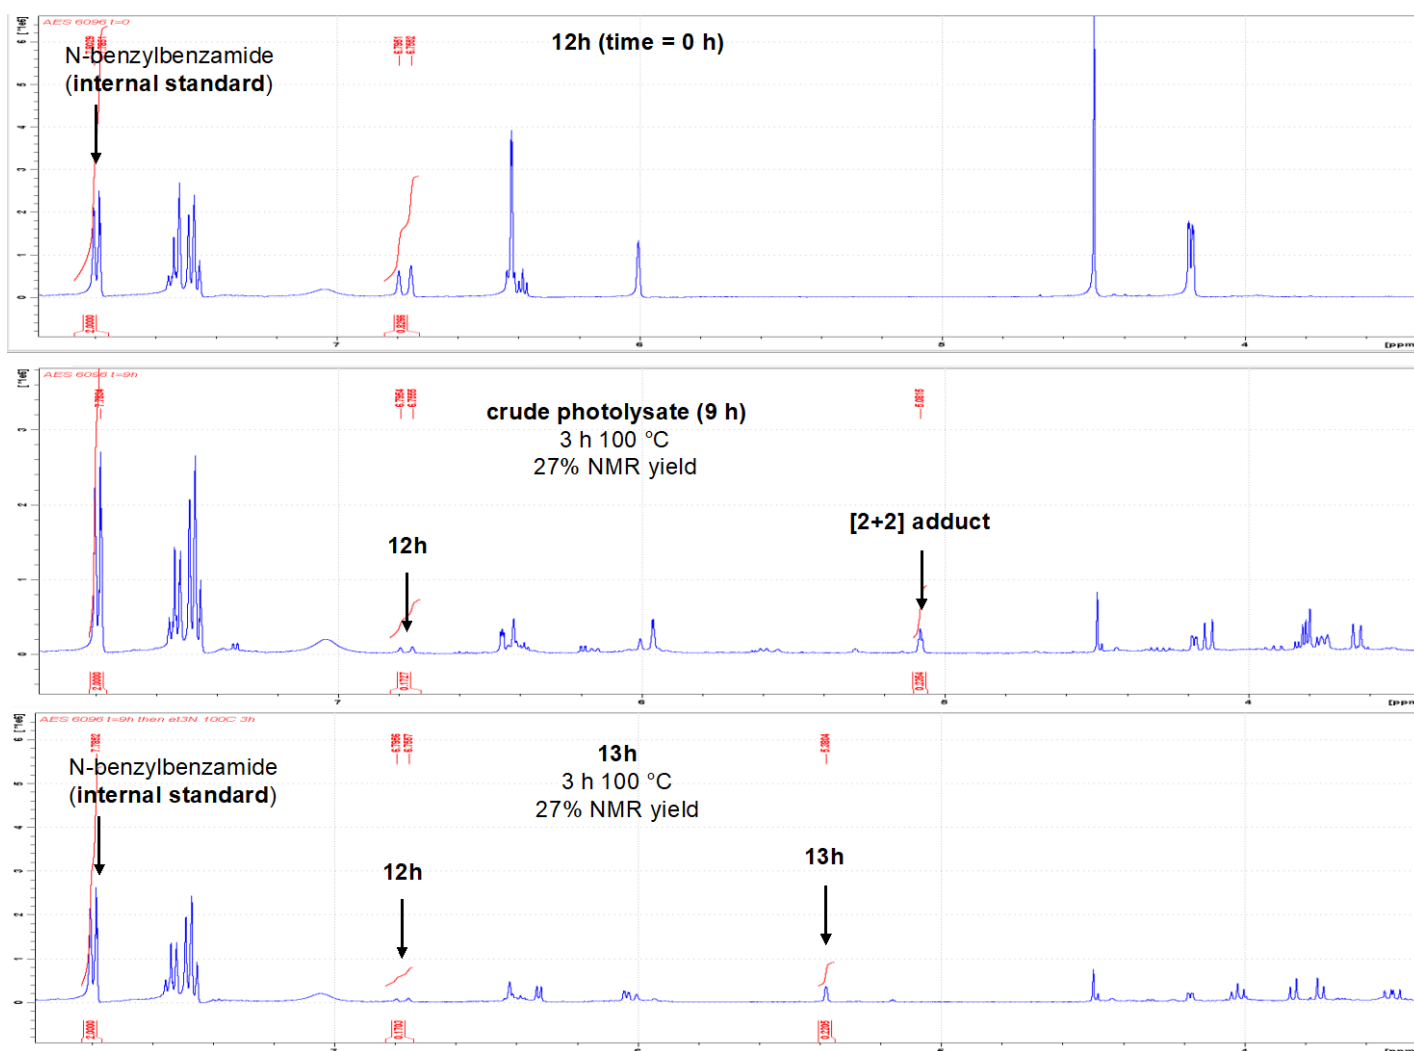

**Procedure & Analysis:** A quartz round-bottom flask was charged with a solution of **12h** (44 mg, 0.2 mmol) and N-benzylbenzamide (27 mg, 0.2 mmol, **internal standard**). Aliquots were taken via syringe to collect <sup>1</sup>H NMR spectra under ambient conditions (400 MHz, CDCl<sub>3</sub>, time = 0, 100% **12h**, panel **A** above). The reaction mixture was exposed to UV-light ( $h\nu = 350$  nm) at 35 °C in a Rayonet. After 9 h, the reaction was removed from UV-light cooled to rt, and analyzed by <sup>1</sup>H NMR (panel **B**). The mixture was then treated with Et<sub>3</sub>N (0.3 mL, 0.2 mmol) and heated to 100 °C. After 3 h, the reaction was cooled to rt. An aliquot was concentrated and analyzed by <sup>1</sup>H NMR (400 MHz, CDCl<sub>3</sub>, panel **C**). This experiment established that **13h** was formed in 27% yield (by NMR).

## 8. Photochemical reaction setup and analysis of quartz vs. Pyrex glassware.

Pictures of reaction setup in the Rayonet are provided below. Reactions described in Tables 1 and 2 were carried out in quartz flasks as described in the manuscript; however, the use of quartz is not required. As shown in Table S1, Pyrex glassware affords identical results (+/- 3% yield, experiments repeated in duplicate) for the photoisomerization of substrate **4** to rearranged cyclooctadiene **3**.

Reaction setup – 0.5 mmol scale

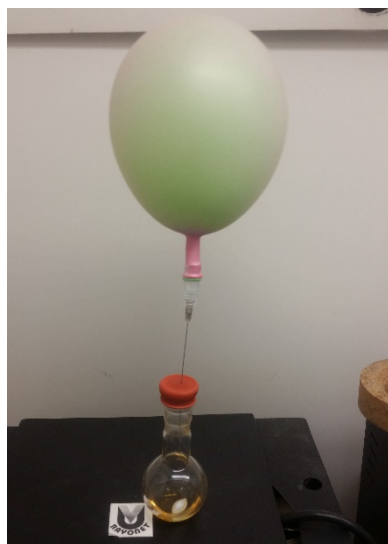

**A**

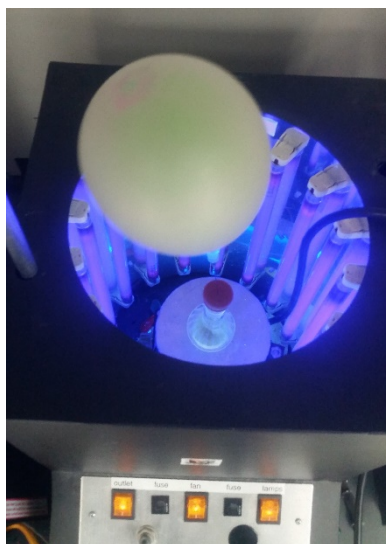

**B**

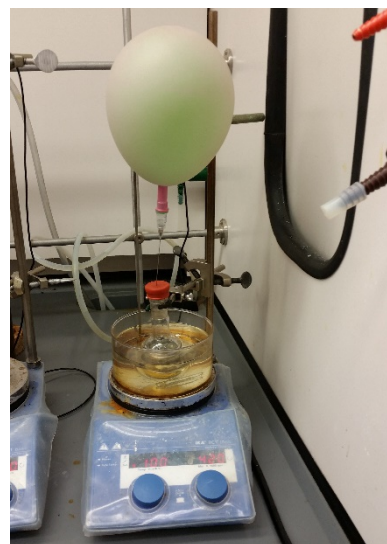

**C**

Reaction setup – gram scale

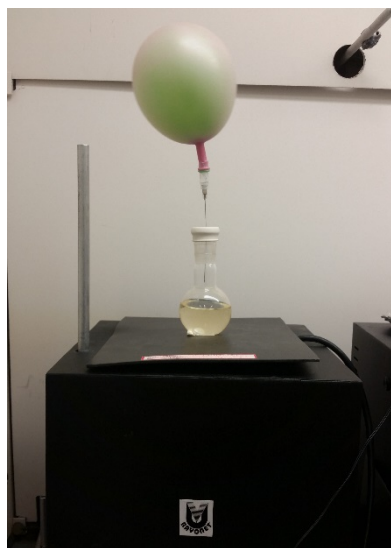

**A**

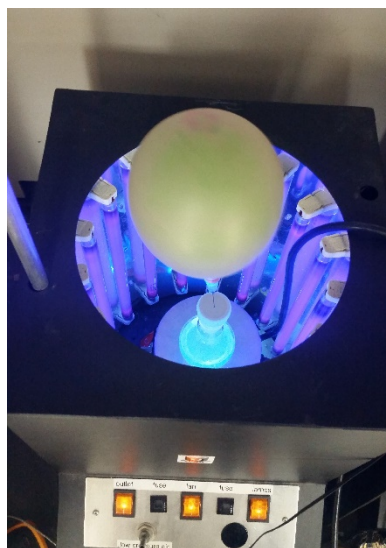

**B**

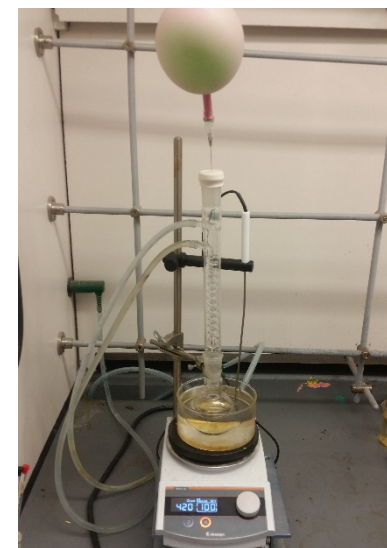

**C**

**A** = Flat-bottom quartz flask charged with photosubstrate in MeCN. The reaction was maintained under an atmosphere of N<sub>2</sub>.

**B** = The reaction vessel was placed on a stir plate within the Rayonet and irradiated using 24 W lamps for the indicated period of time.

**C** = The reaction flask was removed from the Rayonet and directly added to a pre-heated oil bath for the indicated period of time. On larger scale, it was necessary to connect a reflux condenser.

**Table S1.** Direct comparison of quartz vs. Pyrex glassware<sup>a</sup>

| entry | glassware | irradiation time | ratio of 4:5 <sup>b</sup> | yield 3 (%) <sup>c</sup> | recovered 4 (%) |
|-------|-----------|------------------|---------------------------|--------------------------|-----------------|
| 1     | quartz    | 12 h             | 1:2.6                     | 51                       | 26              |
| 2     | Pyrex     | 12 h             | 1:2.3                     | 48                       | 17              |

<sup>a</sup> Photochemistry was carried out using 24 W UV-lamps as described above. Reactions were performed on 0.5 mmol scale utilizing photosubstrate **4** in either a 50 mL quartz flask (entry 1) or 50 mL Pyrex flask of equal dimensions (entry 2).<sup>b</sup> Product ratio of E/Z-**4** and [2+2] photoadduct **5** after exposure to 350 nm UV-light for 12 h as determined by <sup>1</sup>H NMR of the unpurified photolysate (400 MHz, CD<sub>3</sub>CN). Values reported as the average for duplicate experiments. <sup>c</sup> Isolated yield of **3** upon warming the crude photolysate to reflux for 6 h. Purification was performed on neutralized SiO<sub>2</sub> as described above. Values reported as the average for duplicate experiments.

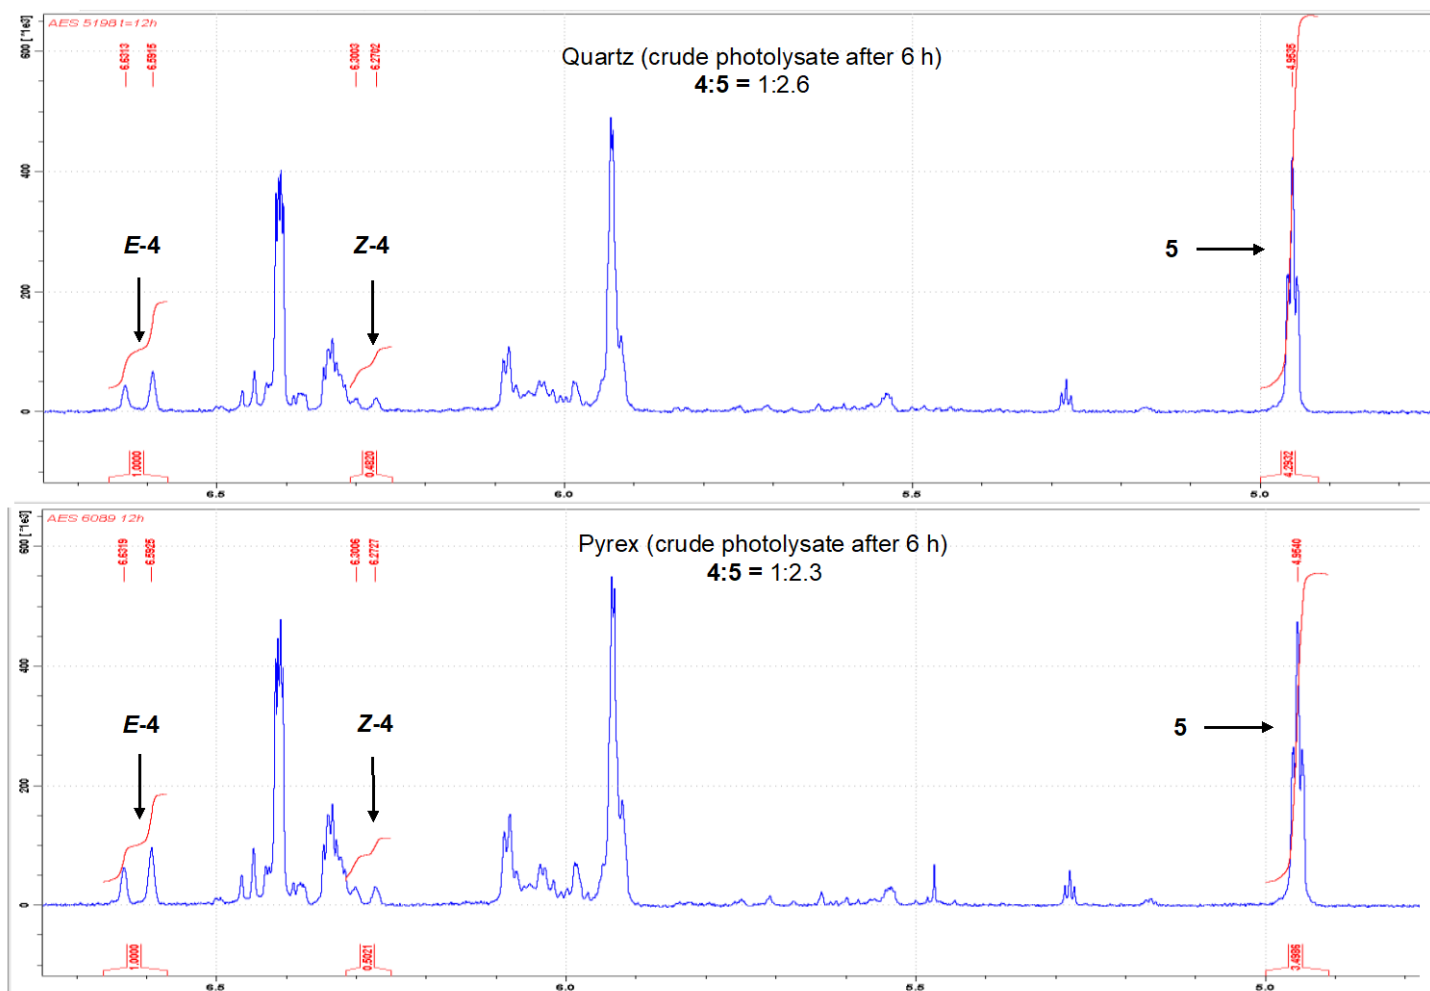

## 9. SI References.

<sup>1</sup> Mukiyama, T.; Matsuo, J.; Kitagawa, H. *Chem. Lett.* **2000**, 29, 1350.

<sup>2</sup> Compound **8** and several other furyl-alkynes reported herein were volatile. Special care should be used to prevent loss of product on the Hi-Vac.

<sup>3</sup> Yamamoto, H.; Sasaki, I.; Imagawa, H.; Nishizawa, M. *Org. Lett.* **2007**, 9, 1399.

- 
- <sup>4</sup> Lautens, M.; Fillion, E. *J. Org. Chem.* **1997**, *62*, 4418.
- <sup>5</sup> Comins, D. L.; Killpack, M. O. *J. Org. Chem.* **1987**, *52*, 104.
- <sup>6</sup> Martín-Matute, B.; Nevado, C.; Cárdenas, D. J.; Echavarren, A. M. *J. Am. Chem. Soc.* **2003**, *125*, 5757.
- <sup>7</sup> Horn, E. J.; Silverston, J. S.; Vanderwal, C. D. *J. Org. Chem.* **2016**, *81*, 1819.
- <sup>8</sup> Heaney, H.; Papageorgiou, G.; Wilkins, R. F. *Tetrahedron Lett.* **1988**, *29*, 2377.
- <sup>9</sup> Nagarajan, R.; Magesh, C. J.; Perumal, P. T. *Synthesis* **2004**, 69.
- <sup>10</sup> Rank, E.; Brückner, R. *Eur. J. Org. Chem.* **1998**, *6*, 1045.
- <sup>11</sup> Wencel-Delord, J.; Alexakis, A.; Crévisy, C.; Mauduit, M. *Org. Lett.* **2010**, *12*, 4335.
- <sup>12</sup> X-ray diffraction data have been deposited at the Cambridge Crystallographic Data Center (CCDC) and can be obtained free of charge at [www.ccdc.cam.ac.uk](http://www.ccdc.cam.ac.uk).
- <sup>13</sup> SiO<sub>2</sub> was saturated in pH 7 buffer and allowed to sit for 10 min. The resulting SiO<sub>2</sub> slurry was concentrated under reduced pressure on a rotovap to remove excess buffer then dried on the Hi-Vac overnight.
- <sup>14</sup> The best yields were obtained when **3** was dried by azeotropic removal of residual water using toluene prior to use. This was particularly important when samples of **3** stored in the freezer were used.
- <sup>15</sup> This quench was modified from a related procedure developed by Baran and co-workers, see: Mendoza, A.; Ishihara, Y.; Baran, P. S. *Nat. Chem.* **2012**, *4*, 21.
- <sup>16</sup> Compound **14** undergoes extensive hydrolysis when passed over SiO<sub>2</sub>; however, we observed that material prepared in this way was stable for long periods of time (>5 months) when stored neat at -20 °C.

NAME JL2262a 1H  
EXPNO 1  
PROCNO 1  
Date\_ 20170228  
Time 23.58  
INSTRUM spect  
PROBHD 5 mm PABBO BB-  
PULPROG zg30  
TD 65536  
SOLVENT CDCl3  
NS 8  
DS 2  
SWH 8223.685 Hz  
FIDRES 0.125483 Hz  
AQ 3.9846387 sec  
RG 203  
DW 60.800 usec  
DE 6.50 usec  
TE 293.9 K  
D1 1.00000000 sec  
TD0 1

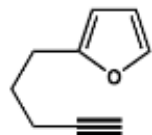

8: C<sub>9</sub>H<sub>10</sub>O  
MW: 134.18

===== CHANNEL f1 =====  
NUC1 1H  
P1 10.00 usec  
PL1 -2.78 dB  
PL1W 27.10892296 W  
SFO1 400.1724712 MHz  
SI 32768  
SF 400.1700083 MHz  
WDW EM  
SSB 0  
LB 0.30 Hz  
GB 0  
PC 1.00

7.306  
7.260  
6.281  
6.019  
2.760  
2.236  
1.983  
1.874

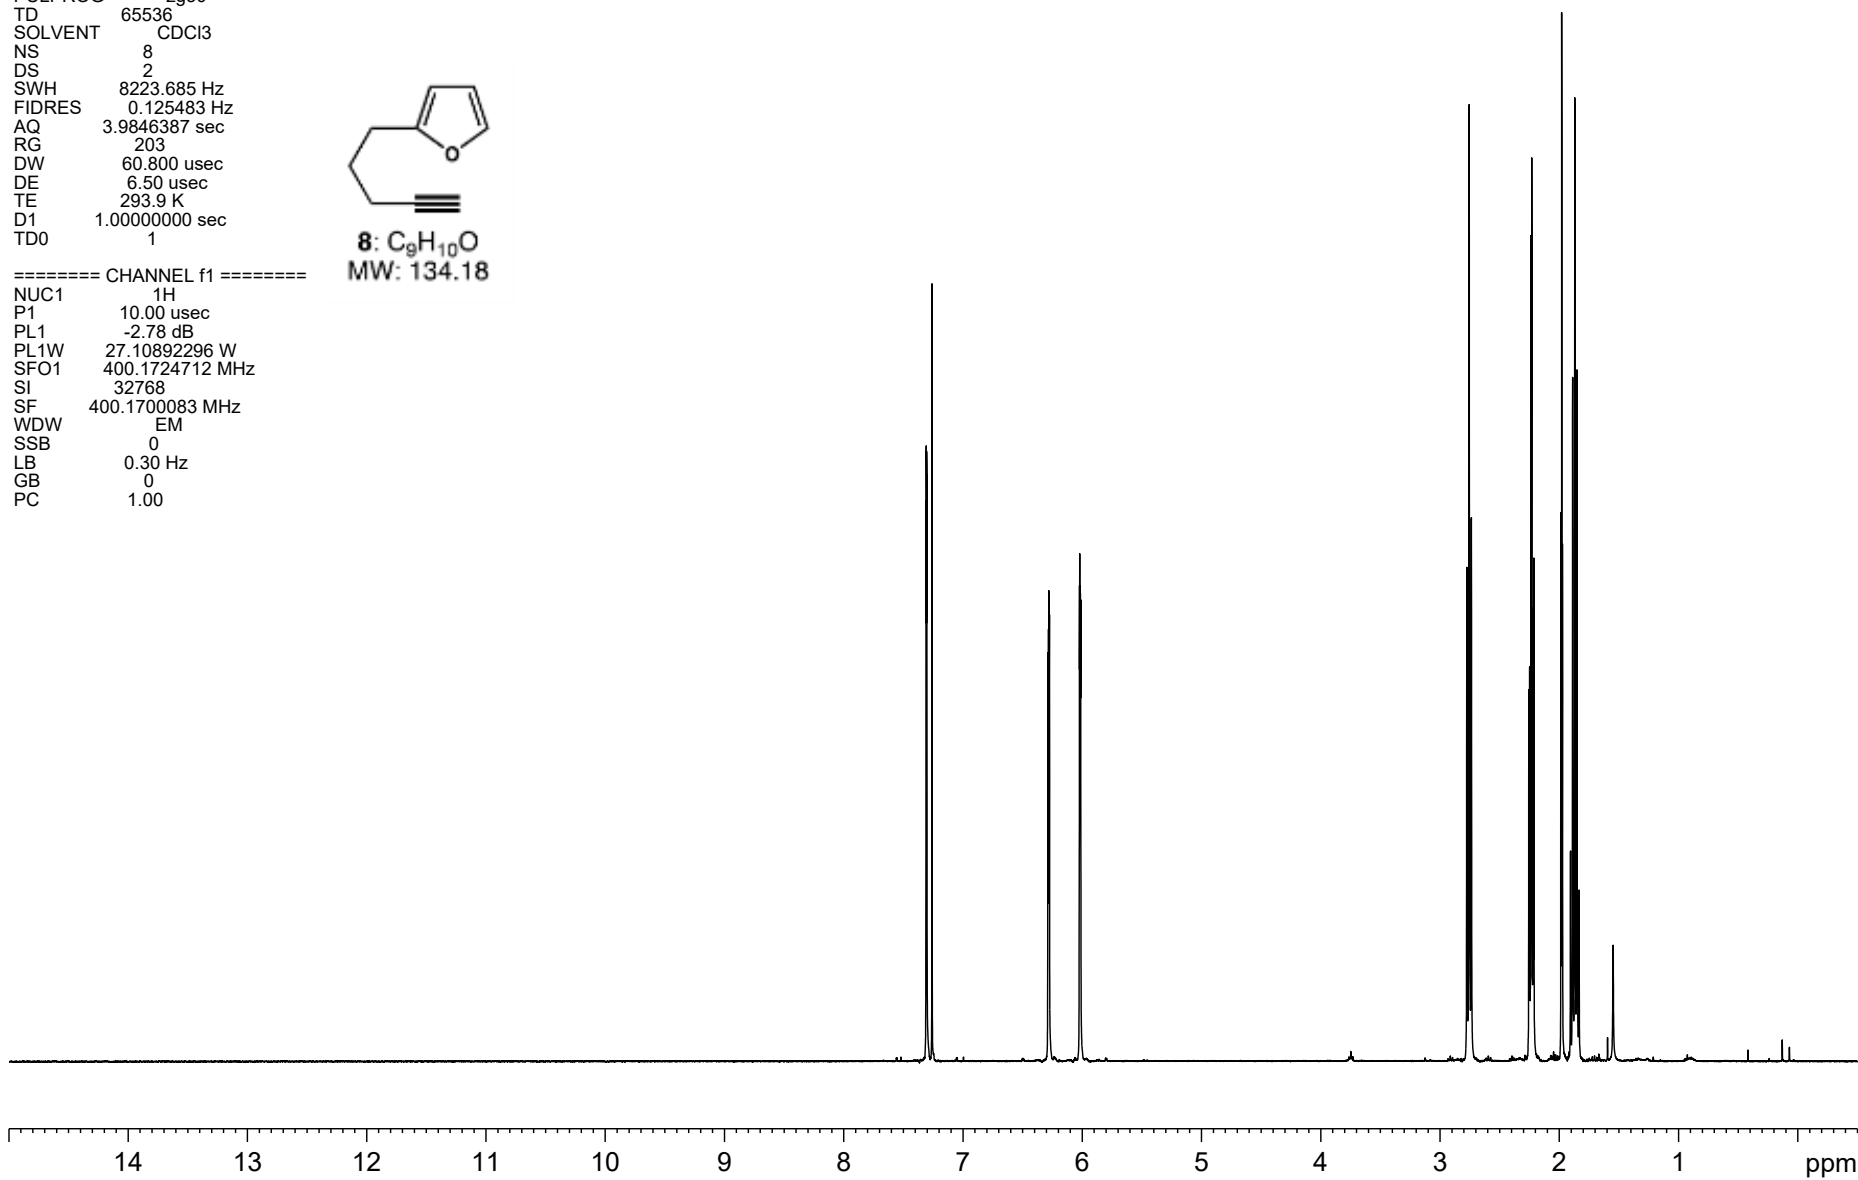

0.98

1.00

1.00

2.09

2.11

1.00

2.13

NAME JL2265a 1H  
EXPNO 1  
PROCNO 1  
Date\_ 20170303  
Time 10.54  
INSTRUM spect  
PROBHD 5 mm PABBO BB-  
PULPROG zg30  
TD 65536  
SOLVENT CDCl3  
NS 8  
DS 2  
SWH 8223.685 Hz  
FIDRES 0.125483 Hz  
AQ 3.9846387 sec  
RG 203  
DW 60.800 usec  
DE 6.50 usec  
TE 292.8 K  
D1 1.00000000 sec  
TD0 1

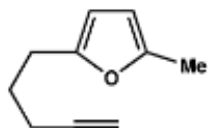

S1: C<sub>10</sub>H<sub>12</sub>O  
MW: 148,21

===== CHANNEL f1 =====  
NUC1 1H  
P1 10.00 usec  
PL1 -2.78 dB  
PL1W 27.10892296 W  
SFO1 400.1724712 MHz  
SI 32768  
SF 400.1700088 MHz  
WDW EM  
SSB 0  
LB 0.30 Hz  
GB 0  
PC 1.00

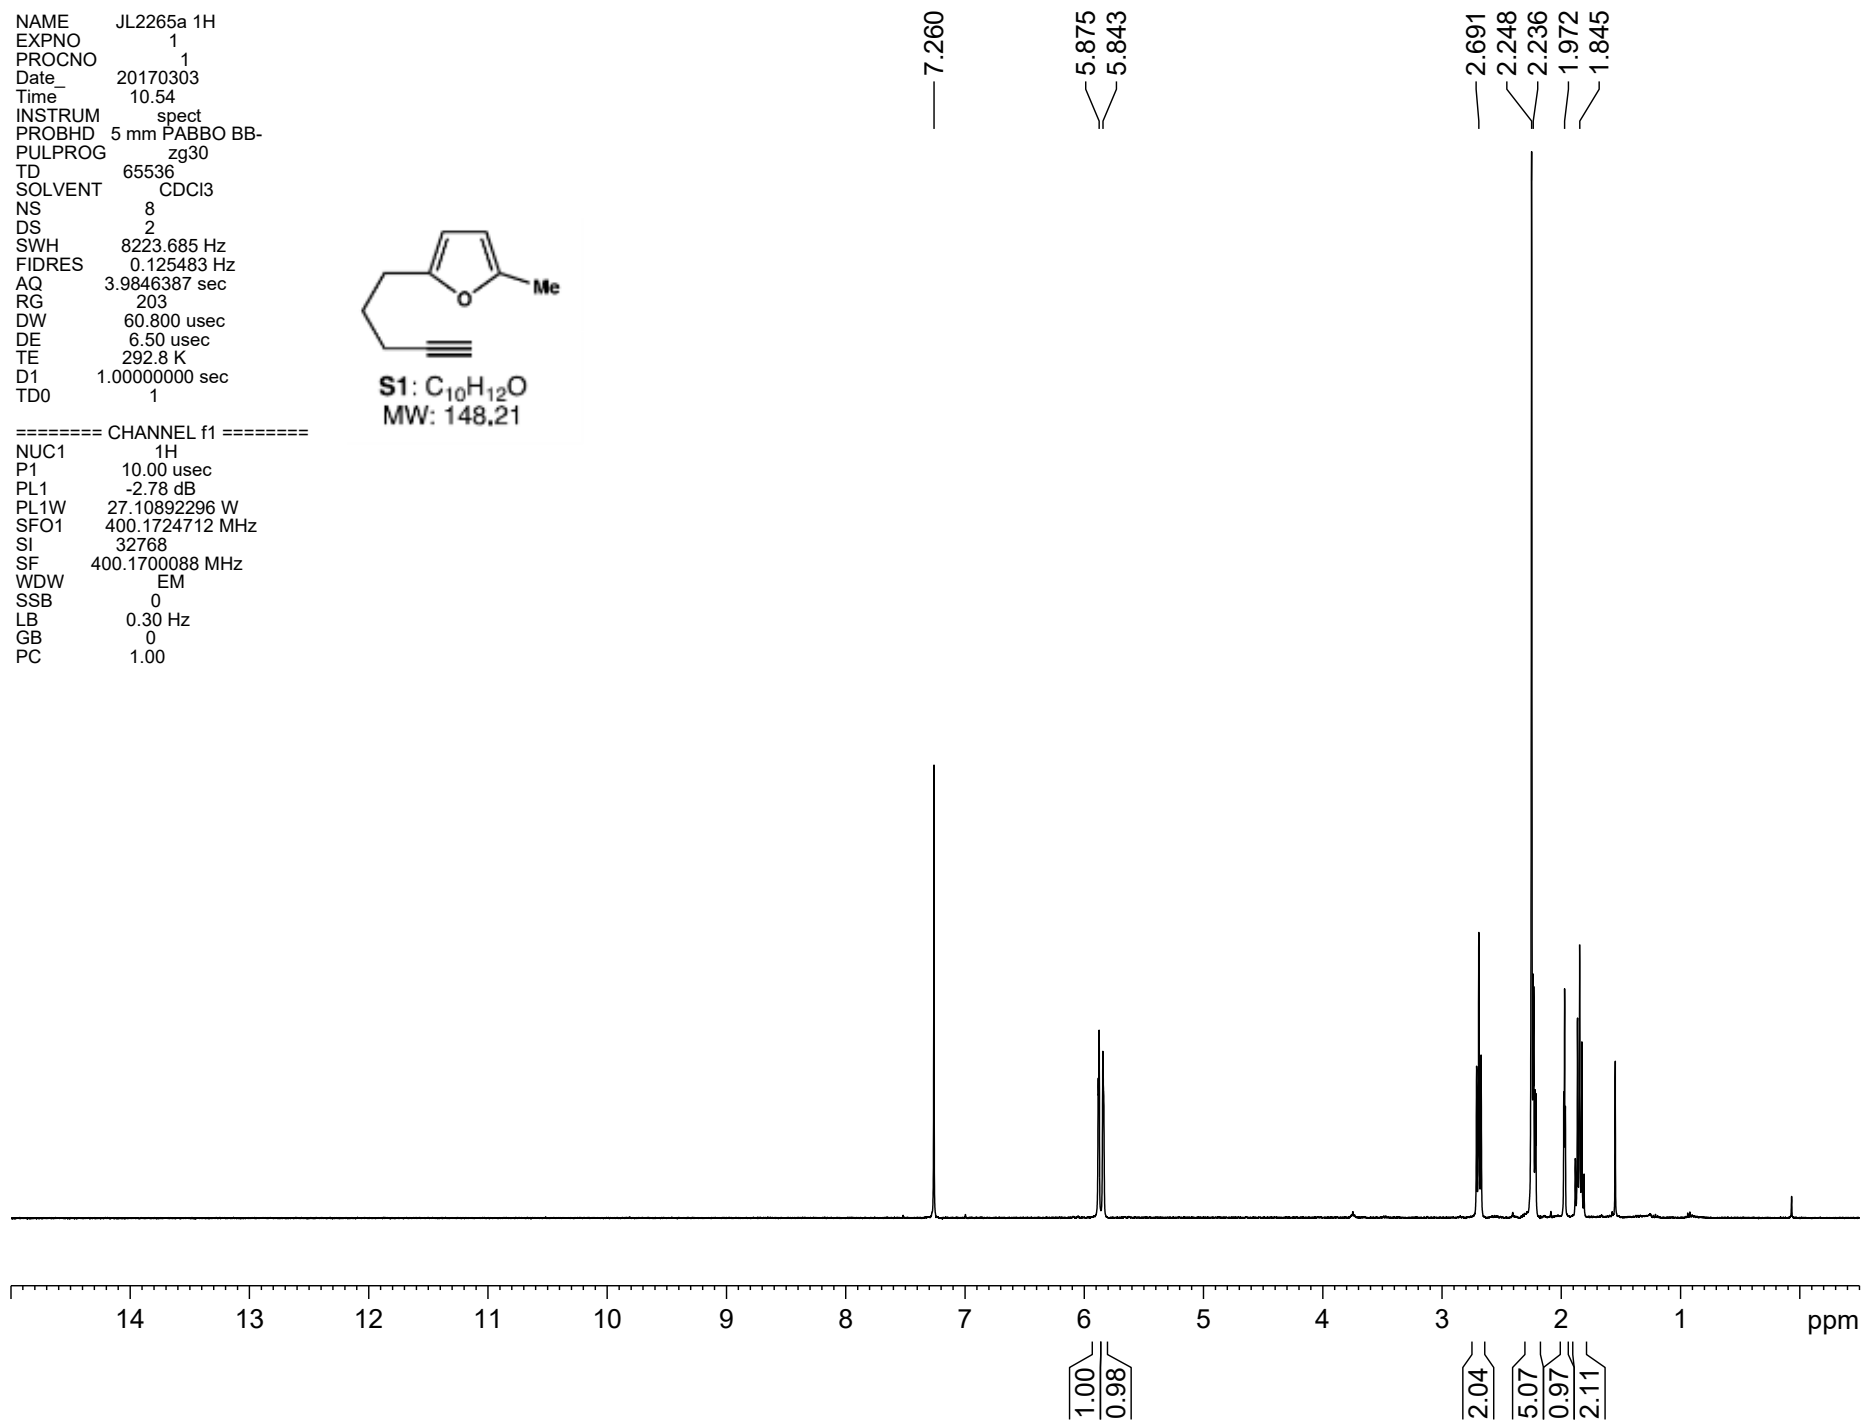

NAME JL2281cd 1H  
 EXPNO 2  
 PROCNO 1  
 Date\_ 20170312  
 Time 20.27  
 INSTRUM spect  
 PROBHD 5 mm PABBO BB-  
 PULPROG zg30  
 TD 65536  
 SOLVENT CDCl3  
 NS 8  
 DS 2  
 SWH 8223.685 Hz  
 FIDRES 0.125483 Hz  
 AQ 3.9846387 sec  
 RG 203  
 DW 60.800 usec  
 DE 6.50 usec  
 TE 292.9 K  
 D1 1.00000000 sec  
 TD0 1

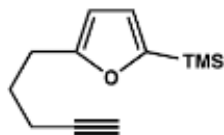

S2: C<sub>12</sub>H<sub>18</sub>OSi  
 MW: 206.36

===== CHANNEL f1 =====  
 NUC1 1H  
 P1 10.00 usec  
 PL1 -2.78 dB  
 PL1W 27.10892296 W  
 SFO1 400.1724712 MHz  
 SI 32768  
 SF 400.1700088 MHz  
 WDW EM  
 SSB 0  
 LB 0.30 Hz  
 GB 0  
 PC 1.00

7.260  
 6.518  
 5.997

2.781  
 2.249  
 1.981  
 1.884

0.240

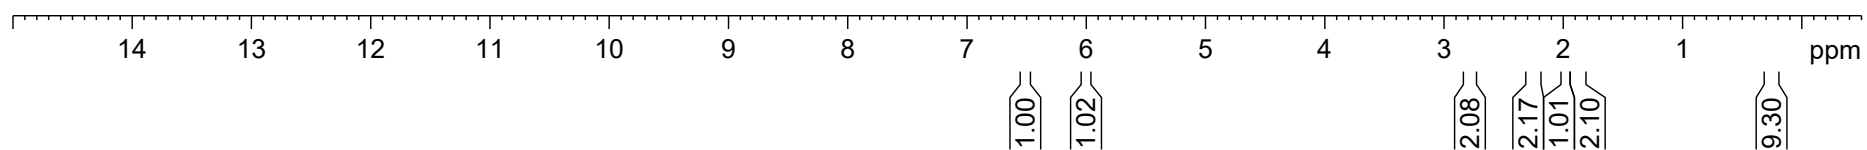



NAME JL2281cd 13C  
 EXPNO 1  
 PROCNO 1  
 Date\_ 20170312  
 Time 22.01  
 INSTRUM spect  
 PROBHD 5 mm PABBO BB-  
 PULPROG zgpg30  
 TD 65536  
 SOLVENT CDCl3  
 NS 34  
 DS 4  
 SWH 24038.461 Hz  
 FIDRES 0.366798 Hz  
 AQ 1.3631988 sec  
 RG 203  
 DW 20.800 usec  
 DE 6.50 usec  
 TE 293.2 K  
 D1 2.00000000 sec  
 D11 0.03000000 sec  
 TD0 1

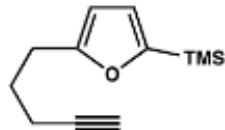

**S2: C<sub>12</sub>H<sub>18</sub>OSi**  
 MW: 206.36

===== CHANNEL f1 =====  
 NUC1 13C  
 P1 10.00 usec  
 PL1 -1.78 dB  
 PL1W 47.30532455 W  
 SFO1 100.6328888 MHz

===== CHANNEL f2 =====  
 CPDPRG2 waltz16  
 NUC2 1H  
 PCPD2 80.00 usec  
 PL2 -2.78 dB  
 PL12 15.28 dB  
 PL13 18.00 dB  
 PL2W 27.10892296 W  
 PL12W 0.42375252 W  
 PL13W 0.22652298 W  
 SFO2 400.1716007 MHz  
 SI 32768  
 SF 100.6228270 MHz  
 WDW EM  
 SSB 0  
 LB 1.00 Hz  
 GB 0  
 PC 1.40

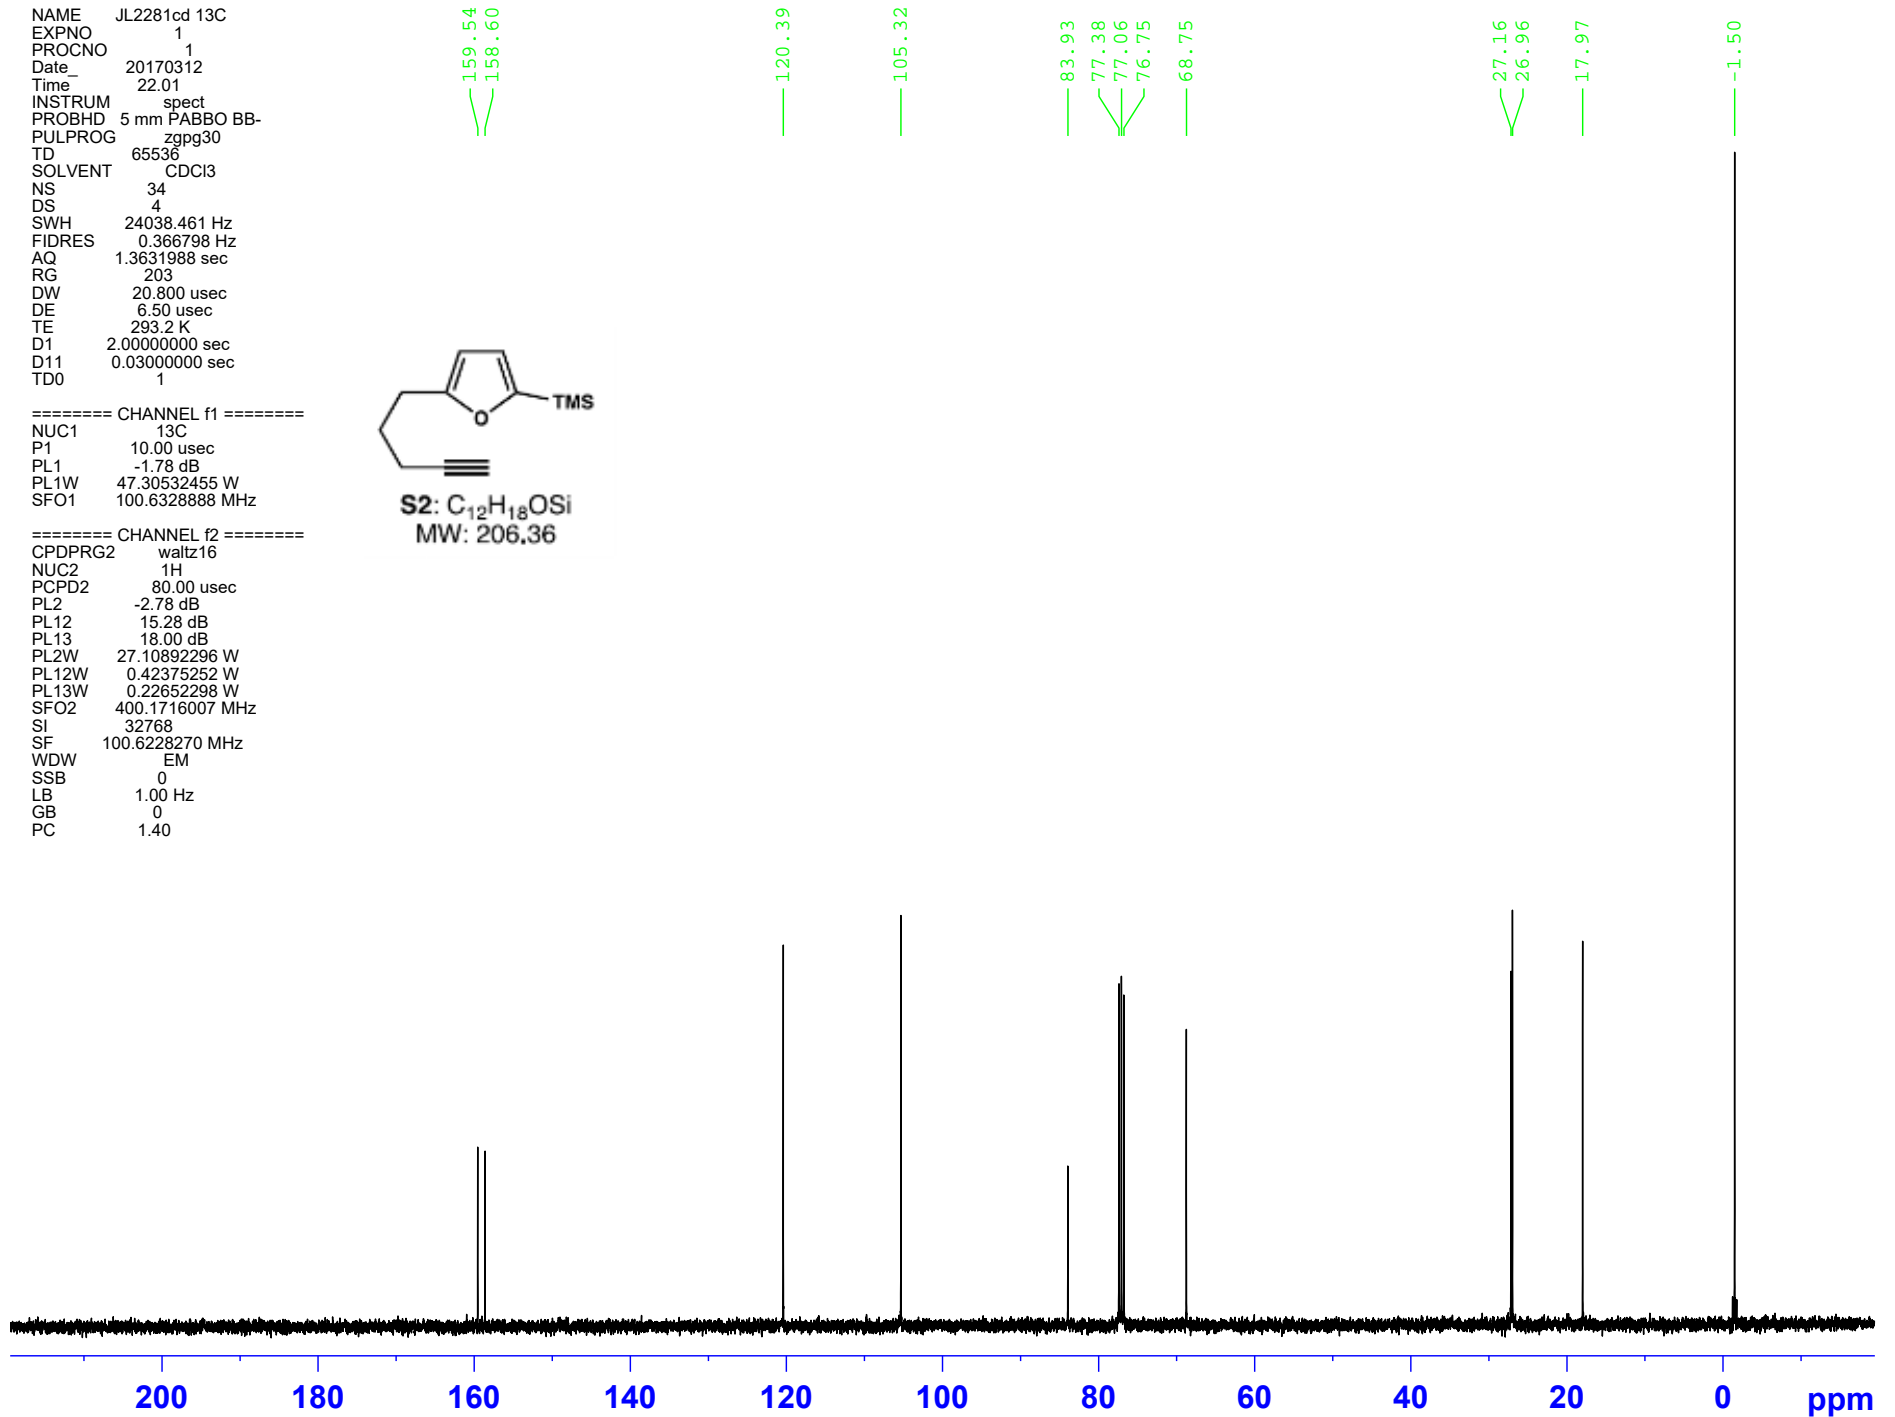

NAME JL2279b 1H  
 EXPNO 2  
 PROCNO 1  
 Date\_ 20170401  
 Time 19.32  
 INSTRUM spect  
 PROBHD 5 mm PABBO BB-  
 PULPROG zg30  
 TD 65536  
 SOLVENT CDCl3  
 NS 8  
 DS 2  
 SWH 8223.685 Hz  
 FIDRES 0.125483 Hz  
 AQ 3.9846387 sec  
 RG 203  
 DW 60.800 usec  
 DE 6.50 usec  
 TE 292.9 K  
 D1 1.00000000 sec  
 TD0 1

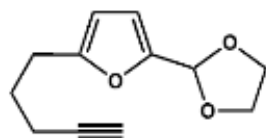

**S3: C<sub>12</sub>H<sub>14</sub>O<sub>3</sub>**  
 MW: 206.24

===== CHANNEL f1 =====  
 NUC1 1H  
 P1 10.00 usec  
 PL1 -2.78 dB  
 PL1W 27.10892296 W  
 SFO1 400.1724712 MHz  
 SI 32768  
 SF 400.1700091 MHz  
 WDW EM  
 SSB 0  
 LB 0.30 Hz  
 GB 0  
 PC 1.00

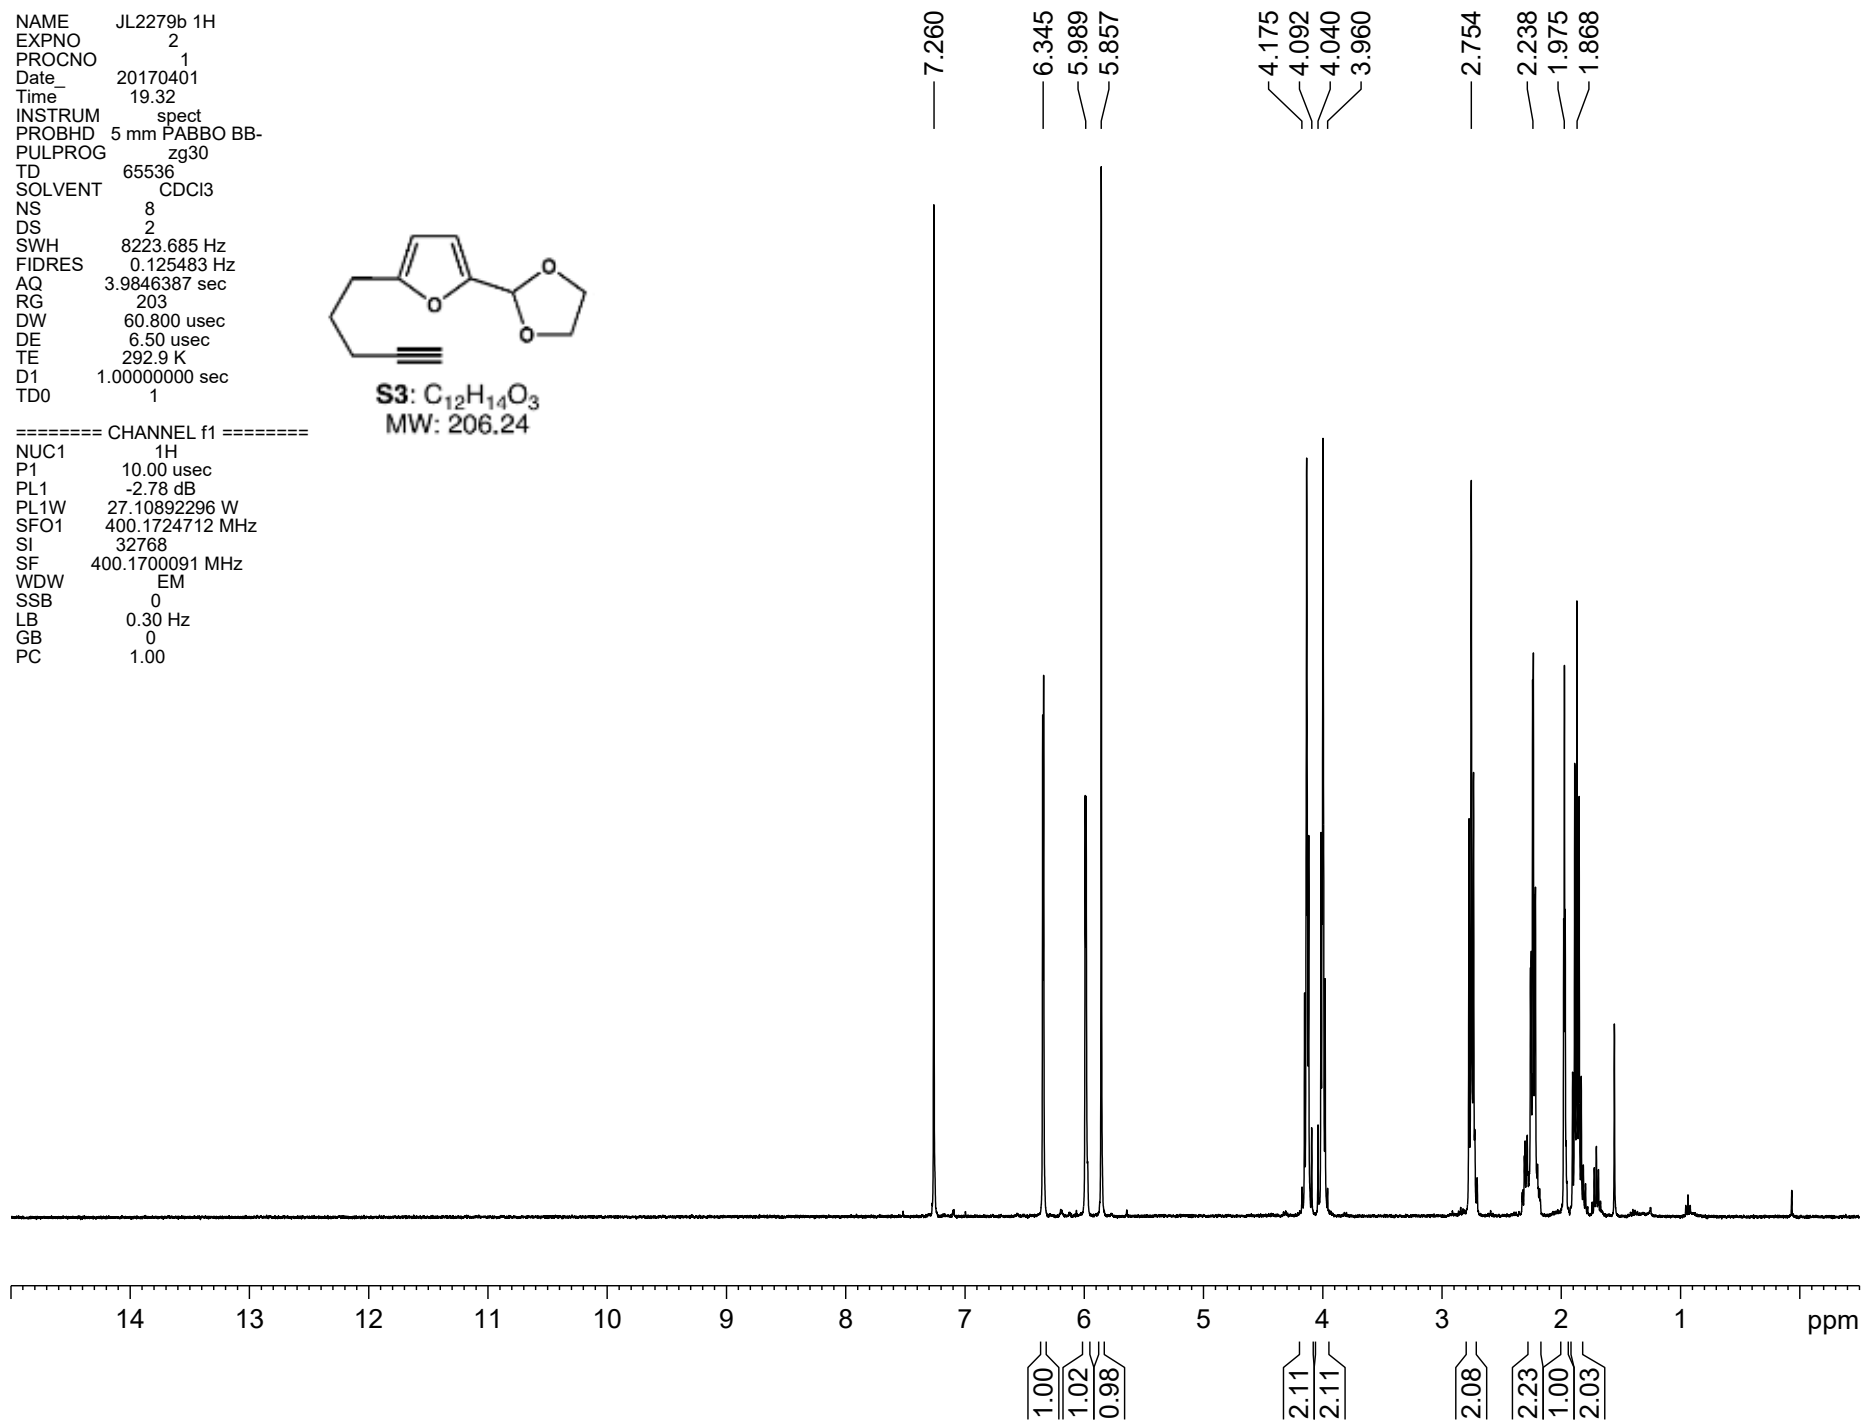

NAME JL2279b 13C  
EXPNO 1  
PROCNO 1  
Date\_ 20170314  
Time 1.27  
INSTRUM spect  
PROBHD 5 mm PABBO BB-  
PULPROG zgpg30  
TD 65536  
SOLVENT CDCl3  
NS 33  
DS 4  
SWH 24038.461 Hz  
FIDRES 0.366798 Hz  
AQ 1.3631988 sec  
RG 203  
DW 20.800 usec  
DE 6.50 usec  
TE 293.3 K  
D1 2.00000000 sec  
D11 0.03000000 sec  
TD0 1

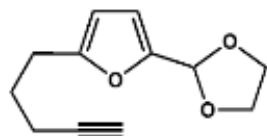

S3: C<sub>12</sub>H<sub>14</sub>O<sub>3</sub>  
MW: 206.24

===== CHANNEL f1 =====  
NUC1 13C  
P1 10.00 usec  
PL1 -1.78 dB  
PL1W 47.30532455 W  
SFO1 100.6328888 MHz

===== CHANNEL f2 =====  
CPDPRG2 waltz16  
NUC2 1H  
PCPD2 80.00 usec  
PL2 -2.78 dB  
PL12 15.28 dB  
PL13 18.00 dB  
PL2W 27.10892296 W  
PL12W 0.42375252 W  
PL13W 0.22652298 W  
SFO2 400.1716007 MHz  
SI 32768  
SF 100.6228270 MHz  
WDW EM  
SSB 0  
LB 1.00 Hz  
GB 0  
PC 1.40

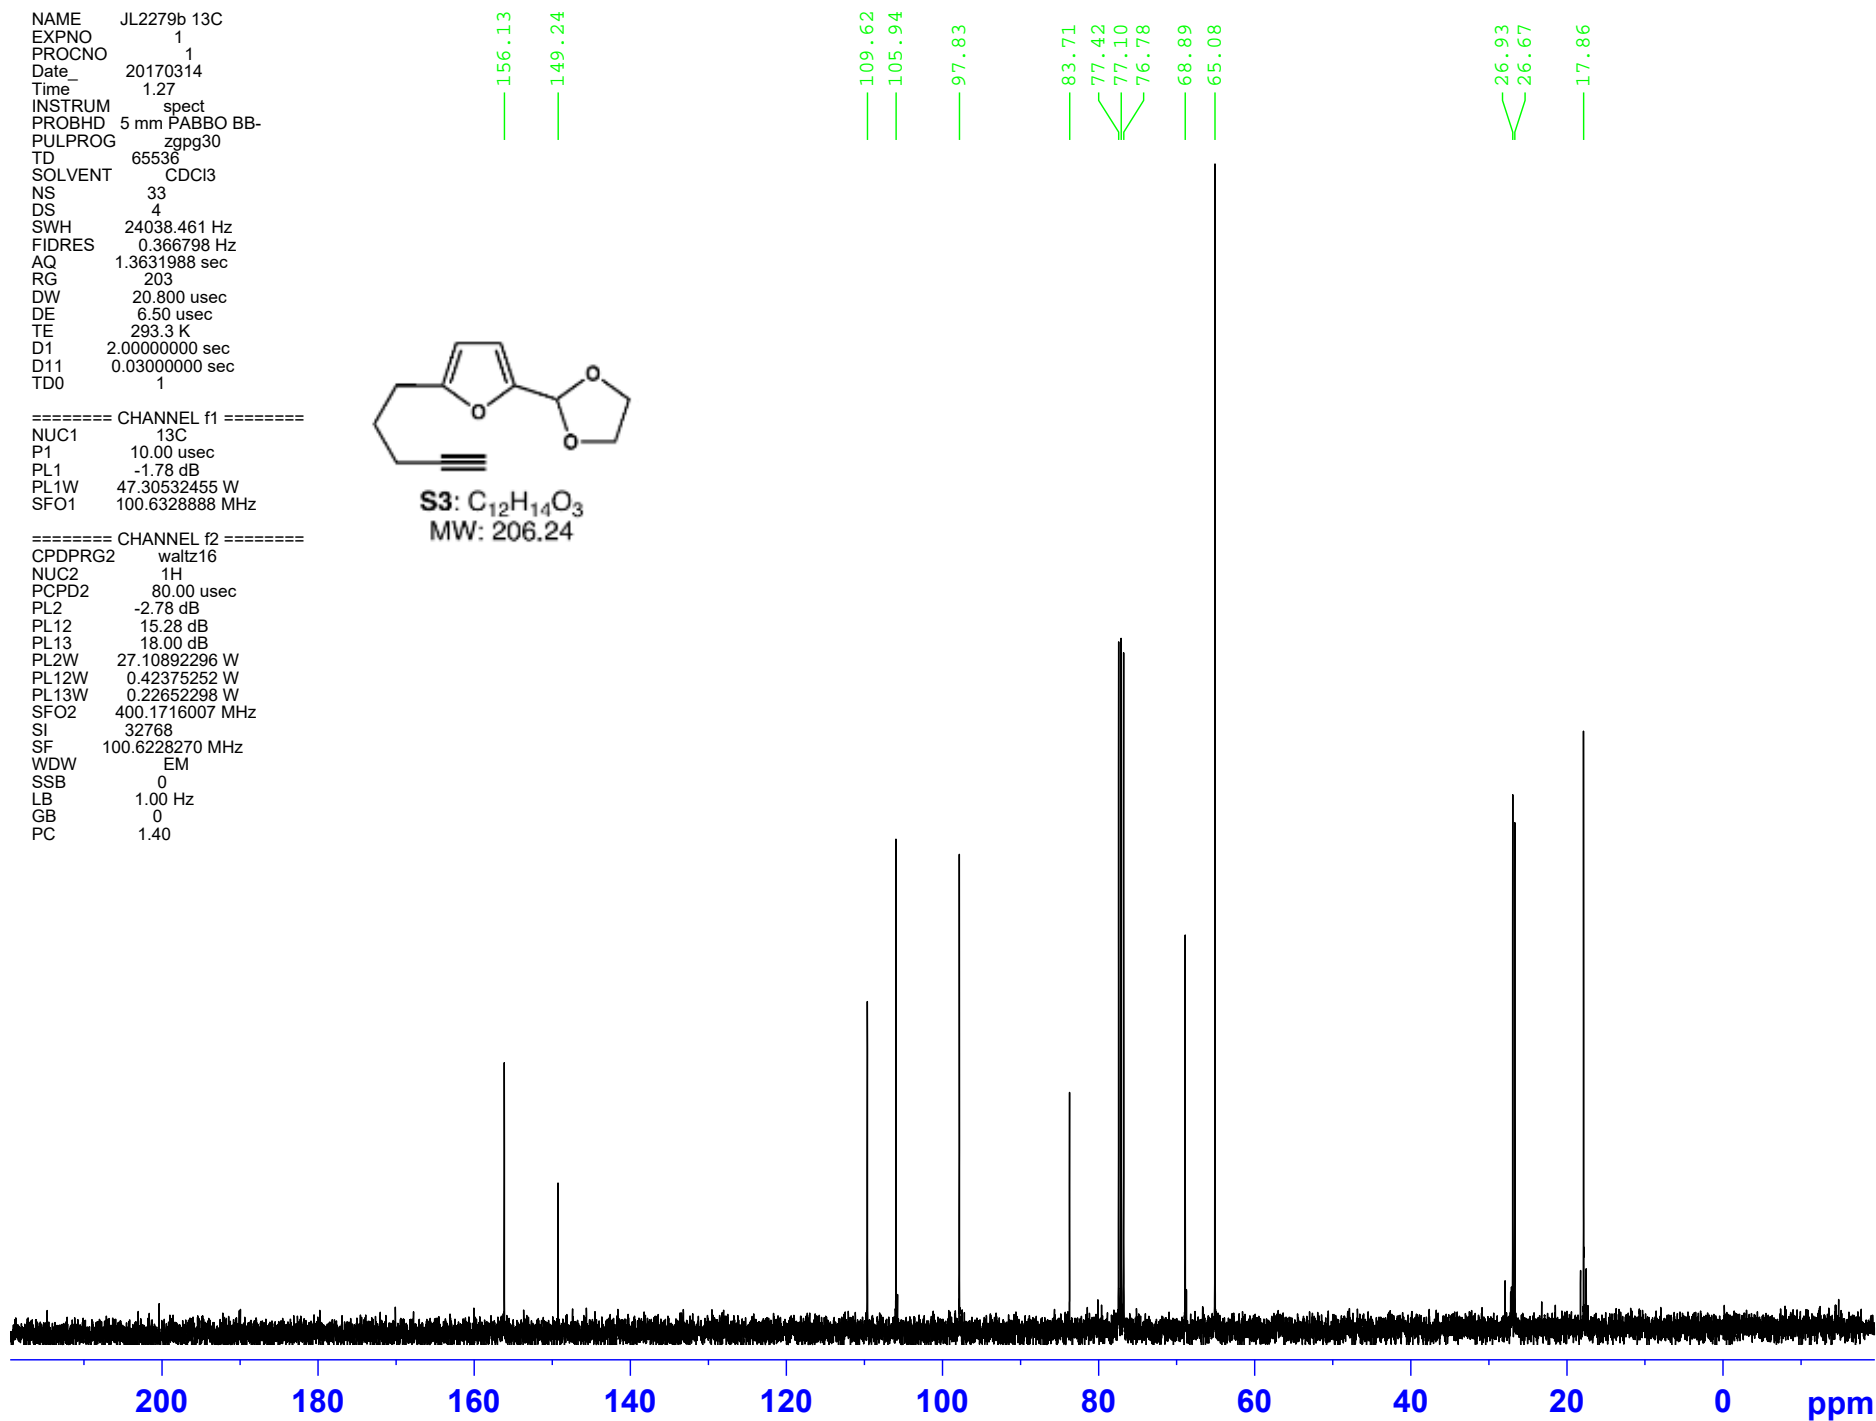

NAME AES 4056 1H  
 EXPNO 1  
 PROCNO 1  
 Date\_ 20170512  
 Time 23.15  
 INSTRUM spect  
 PROBHD 5 mm PABBO BB-  
 PULPROG zg30  
 TD 65536  
 SOLVENT CDCl3  
 NS 8  
 DS 2  
 SWH 8223.685 Hz  
 FIDRES 0.125483 Hz  
 AQ 3.9846387 sec  
 RG 40.3  
 DW 60.800 usec  
 DE 6.50 usec  
 TE 294.3 K  
 D1 1.00000000 sec  
 TD0 1

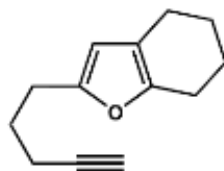

**S4: C<sub>13</sub>H<sub>16</sub>O**  
**MW: 188.27**

===== CHANNEL f1 =====  
 NUC1 1H  
 P1 10.00 usec  
 PL1 -2.78 dB  
 PL1W 27.10892296 W  
 SFO1 400.1724712 MHz  
 SI 32768  
 SF 400.1700094 MHz  
 WDW EM  
 SSB 0  
 LB 0.30 Hz  
 GB 0  
 PC 1.00

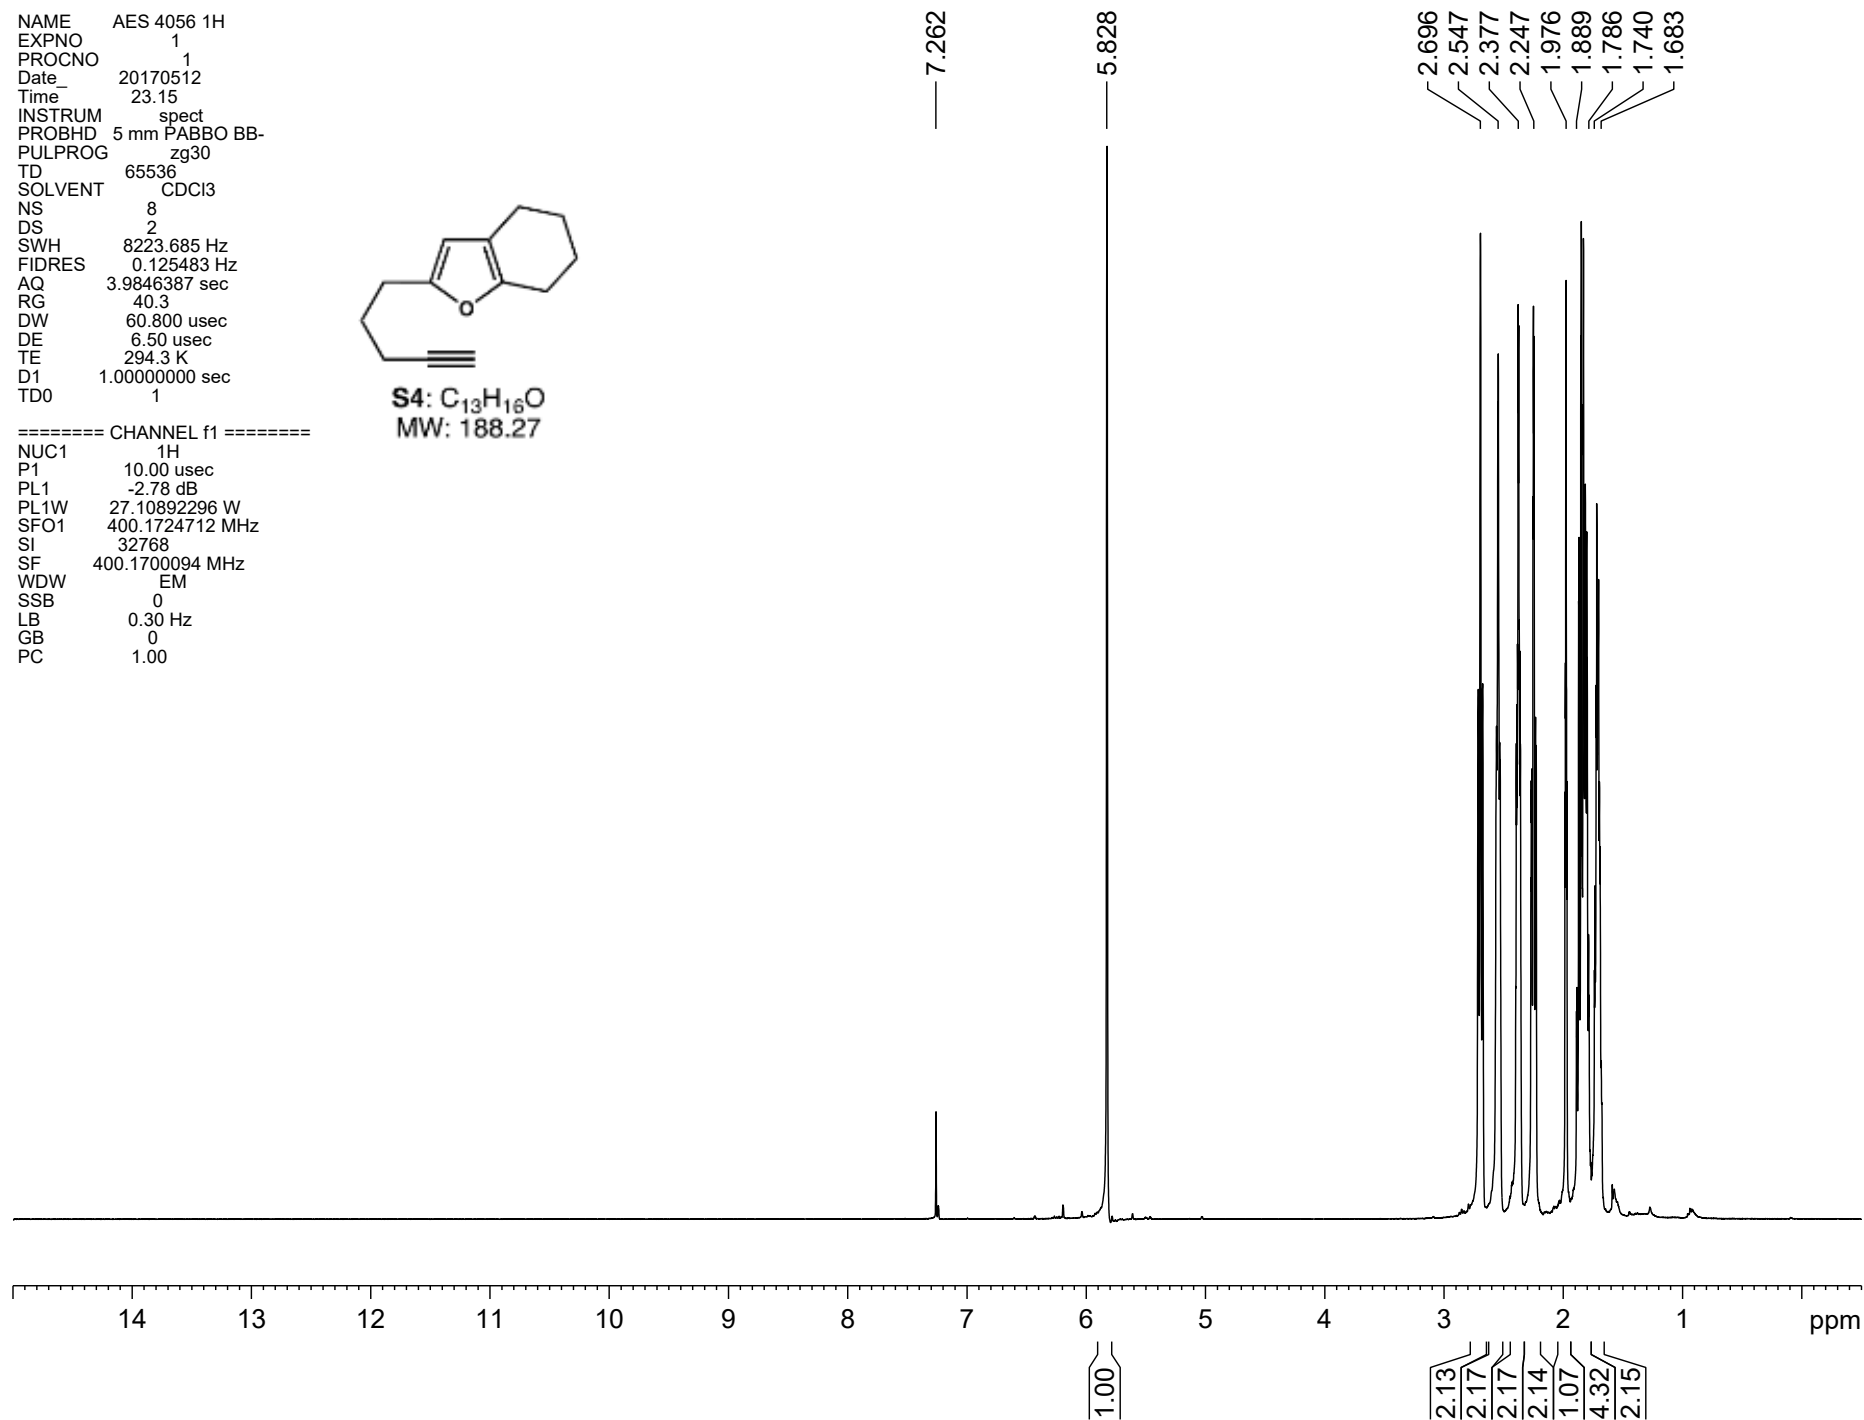

NAME AES 4056 C13  
 EXPNO 1  
 PROCNO 1  
 Date\_ 20170512  
 Time 23.33  
 INSTRUM spect  
 PROBHD 5 mm PABBO BB-  
 PULPROG zgpg30  
 TD 65536  
 SOLVENT CDCl3  
 NS 256  
 DS 4  
 SWH 24038.461 Hz  
 FIDRES 0.366798 Hz  
 AQ 1.3631988 sec  
 RG 203  
 DW 20.800 usec  
 DE 6.50 usec  
 TE 295.3 K  
 D1 2.00000000 sec  
 D11 0.03000000 sec  
 TD0 1

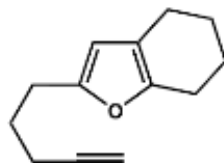

**S4: C<sub>13</sub>H<sub>16</sub>O**  
**MW: 188.27**

===== CHANNEL f1 =====  
 NUC1 13C  
 P1 10.00 usec  
 PL1 -1.78 dB  
 PL1W 47.30532455 W  
 SFO1 100.6328888 MHz

===== CHANNEL f2 =====  
 CPDPRG2 waltz16  
 NUC2 1H  
 PCPD2 80.00 usec  
 PL2 -2.78 dB  
 PL12 15.28 dB  
 PL13 18.00 dB  
 PL2W 27.10892296 W  
 PL12W 0.42375252 W  
 PL13W 0.22652298 W  
 SFO2 400.1716007 MHz  
 SI 32768  
 SF 100.6228270 MHz  
 WDW EM  
 SSB 0  
 LB 1.00 Hz  
 GB 0  
 PC 1.40

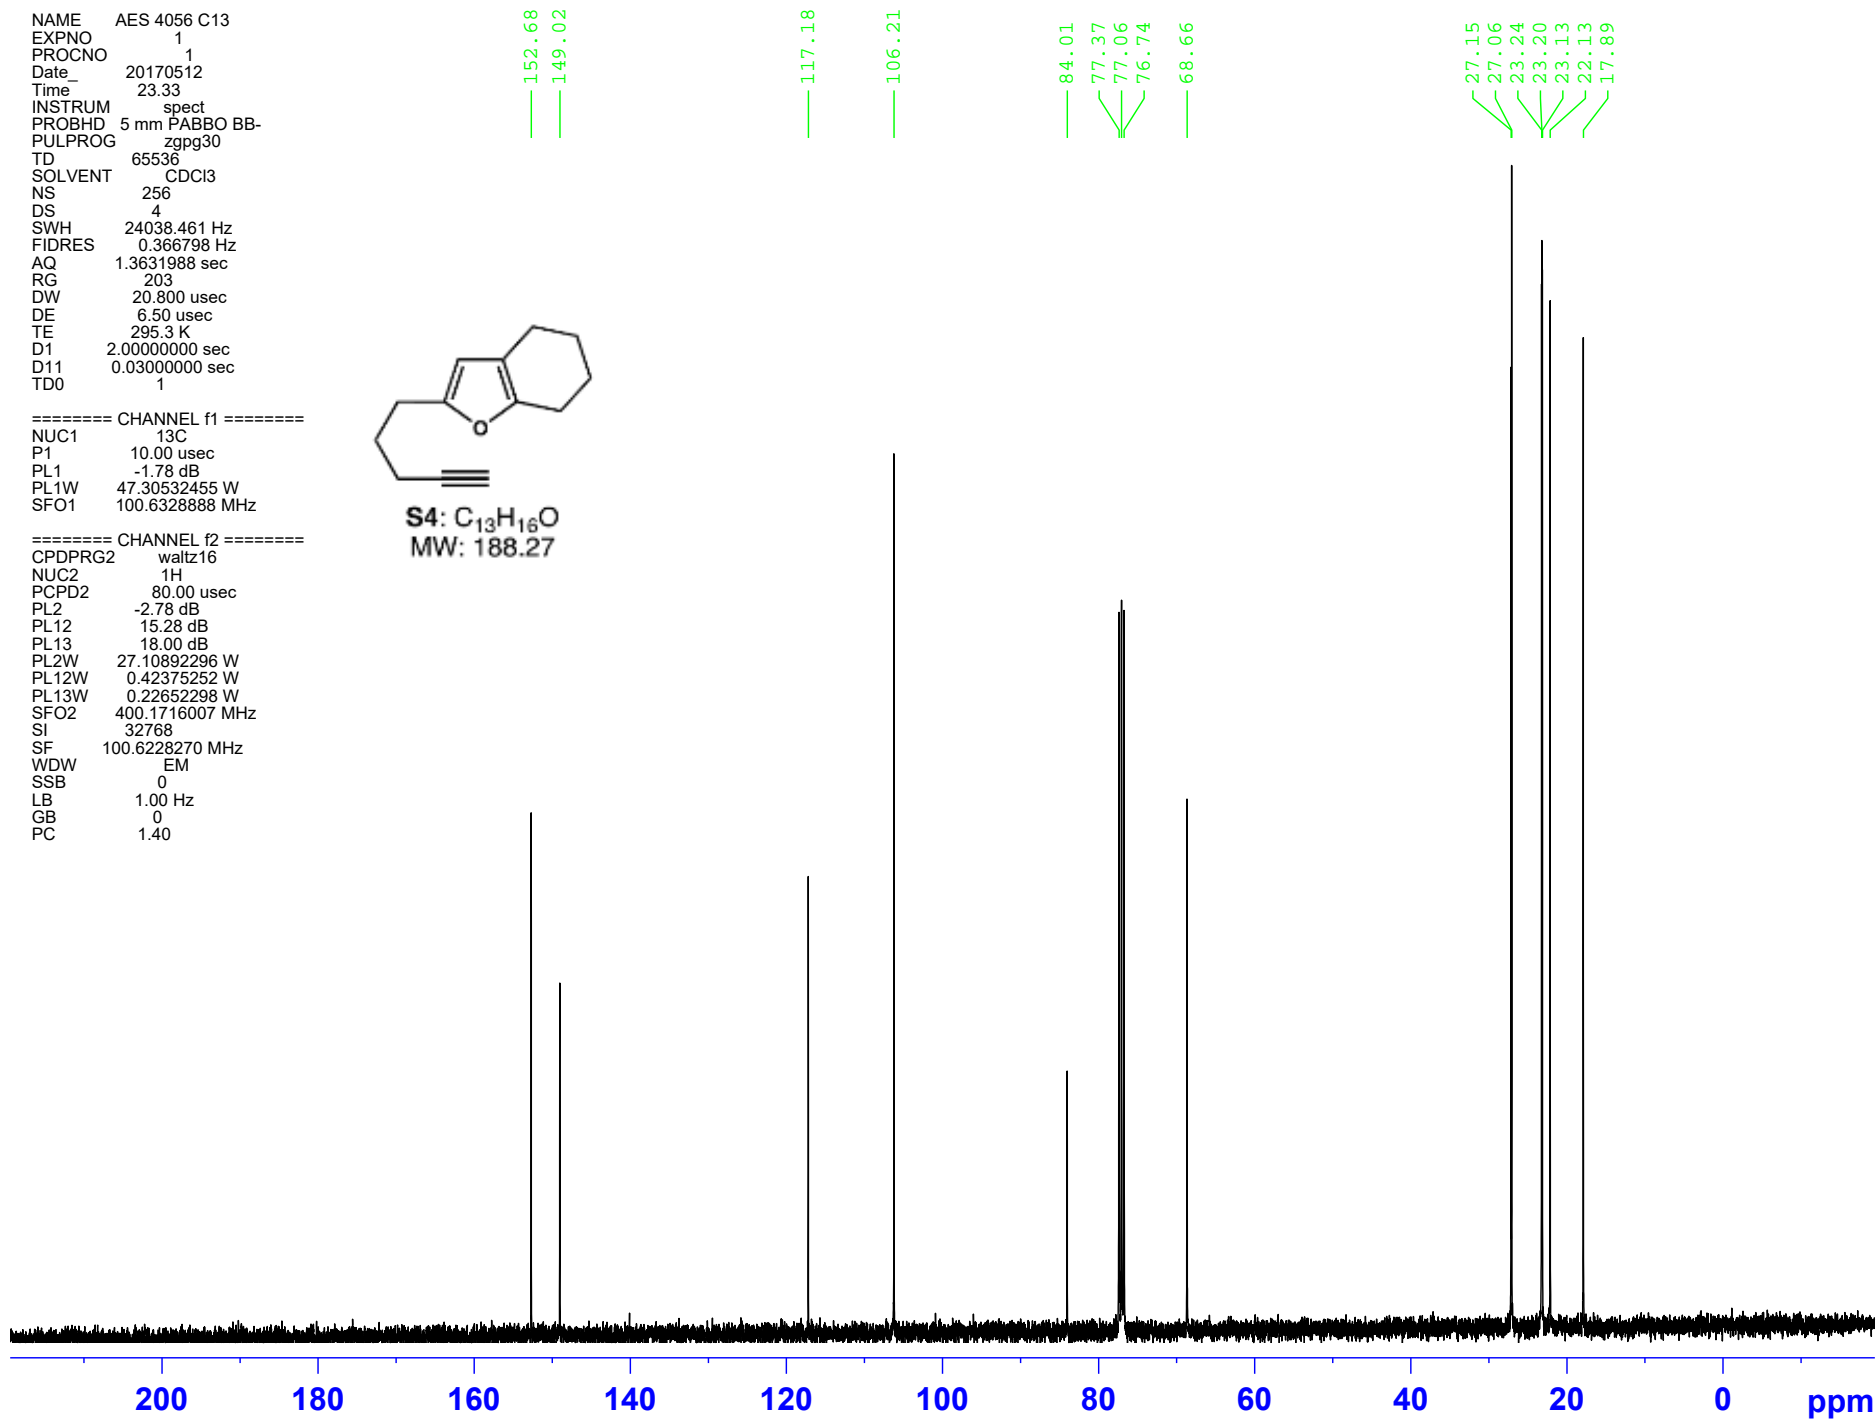



NAME JL3007a 1H  
 EXPNO 2  
 PROCNO 1  
 Date\_ 20170412  
 Time 14.10  
 INSTRUM spect  
 PROBHD 5 mm PABBO BB-  
 PULPROG zg30  
 TD 65536  
 SOLVENT CDCl3  
 NS 8  
 DS 2  
 SWH 8223.685 Hz  
 FIDRES 0.125483 Hz  
 AQ 3.9846387 sec  
 RG 101  
 DW 60.800 usec  
 DE 6.50 usec  
 TE 293.2 K  
 D1 1.00000000 sec  
 TD0 1

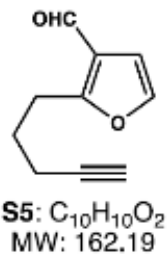

===== CHANNEL f1 =====  
 NUC1 1H  
 P1 10.00 usec  
 PL1 -2.78 dB  
 PL1W 27.10892296 W  
 SFO1 400.1724712 MHz  
 SI 32768  
 SF 400.1700088 MHz  
 WDW EM  
 SSB 0  
 LB 0.30 Hz  
 GB 0  
 PC 1.00

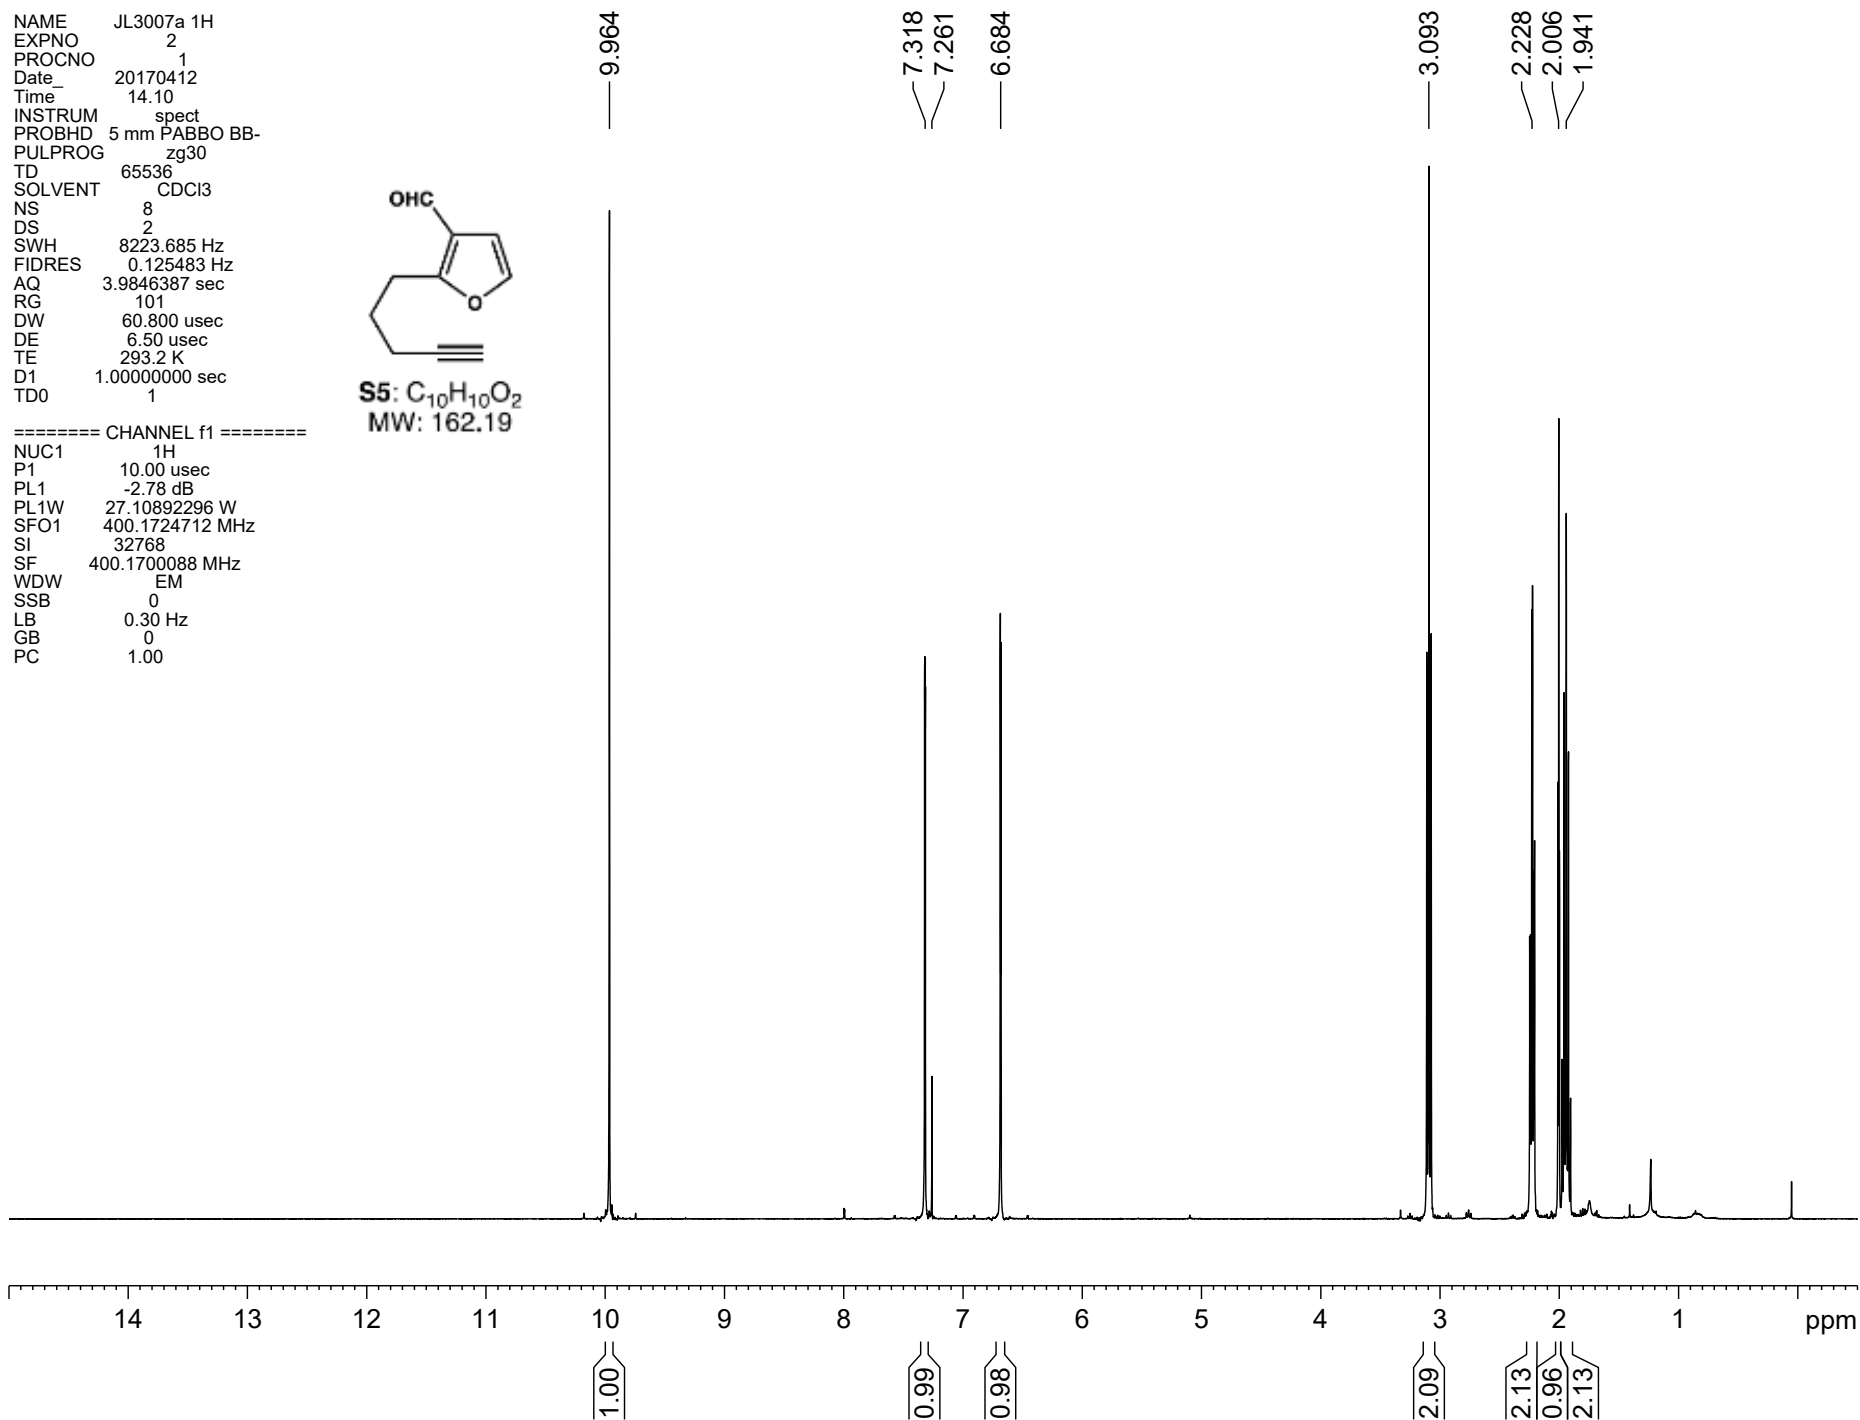

NAME JL3007a 13C  
 EXPNO 1  
 PROCNO 1  
 Date\_ 20170410  
 Time 0.28  
 INSTRUM spect  
 PROBHD 5 mm PABBO BB-  
 PULPROG zgpg30  
 TD 65536  
 SOLVENT CDCl3  
 NS 193  
 DS 4  
 SWH 24038.461 Hz  
 FIDRES 0.366798 Hz  
 AQ 1.3631988 sec  
 RG 203  
 DW 20.800 usec  
 DE 6.50 usec  
 TE 294.0 K  
 D1 2.00000000 sec  
 D11 0.03000000 sec  
 TD0 1

184.87

164.63

142.44

123.12

108.10

83.01

77.48

77.16

76.84

69.68

26.79

25.55

17.81

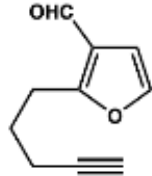

**S5: C<sub>10</sub>H<sub>10</sub>O<sub>2</sub>**  
**MW: 162.19**

===== CHANNEL f1 =====  
 NUC1 13C  
 P1 10.00 usec  
 PL1 -1.78 dB  
 PL1W 47.30532455 W  
 SFO1 100.6328888 MHz

===== CHANNEL f2 =====  
 CPDPRG2 waltz16  
 NUC2 1H  
 PCPD2 80.00 usec  
 PL2 -2.78 dB  
 PL12 15.28 dB  
 PL13 18.00 dB  
 PL2W 27.10892296 W  
 PL12W 0.42375252 W  
 PL13W 0.22652298 W  
 SFO2 400.1716007 MHz  
 SI 32768  
 SF 100.6228158 MHz  
 WDW EM  
 SSB 0  
 LB 1.00 Hz  
 GB 0  
 PC 1.40

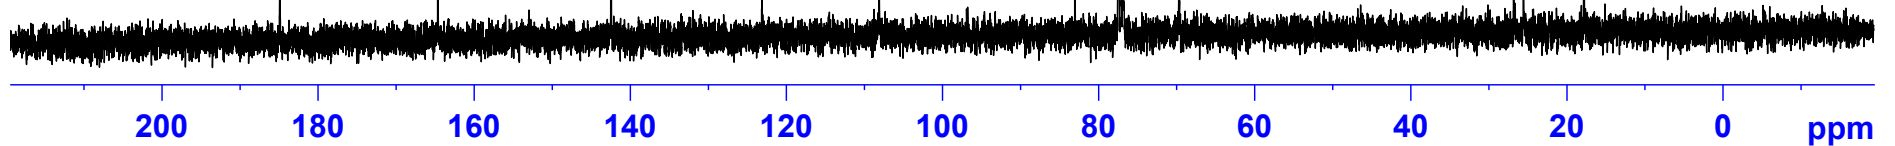

NAME JL3059a 1H  
EXPNO 2  
PROCNO 1  
Date\_ 20170602  
Time 14.24  
INSTRUM spect  
PROBHD 5 mm PABBO BB-  
PULPROG zg30  
TD 65536  
SOLVENT CDCl3  
NS 8  
DS 2  
SWH 8223.685 Hz  
FIDRES 0.125483 Hz  
AQ 3.9846387 sec  
RG 181  
DW 60.800 usec  
DE 6.50 usec  
TE 294.0 K  
D1 1.00000000 sec  
TD0 1

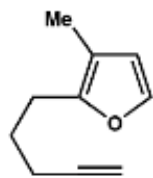

**S6:** C<sub>10</sub>H<sub>12</sub>O  
MW: 148.21

==== CHANNEL f1 =====  
NUC1 1H  
P1 10.00 usec  
PL1 -2.78 dB  
PL1W 27.10892296 W  
SFO1 400.1724712 MHz  
SI 32768  
SF 400.1700091 MHz  
WDW EM  
SSB 0  
LB 0.30 Hz  
GB 0  
PC 1.00

7.260  
7.219

6.156

2.689  
2.180  
1.980  
1.971  
1.832

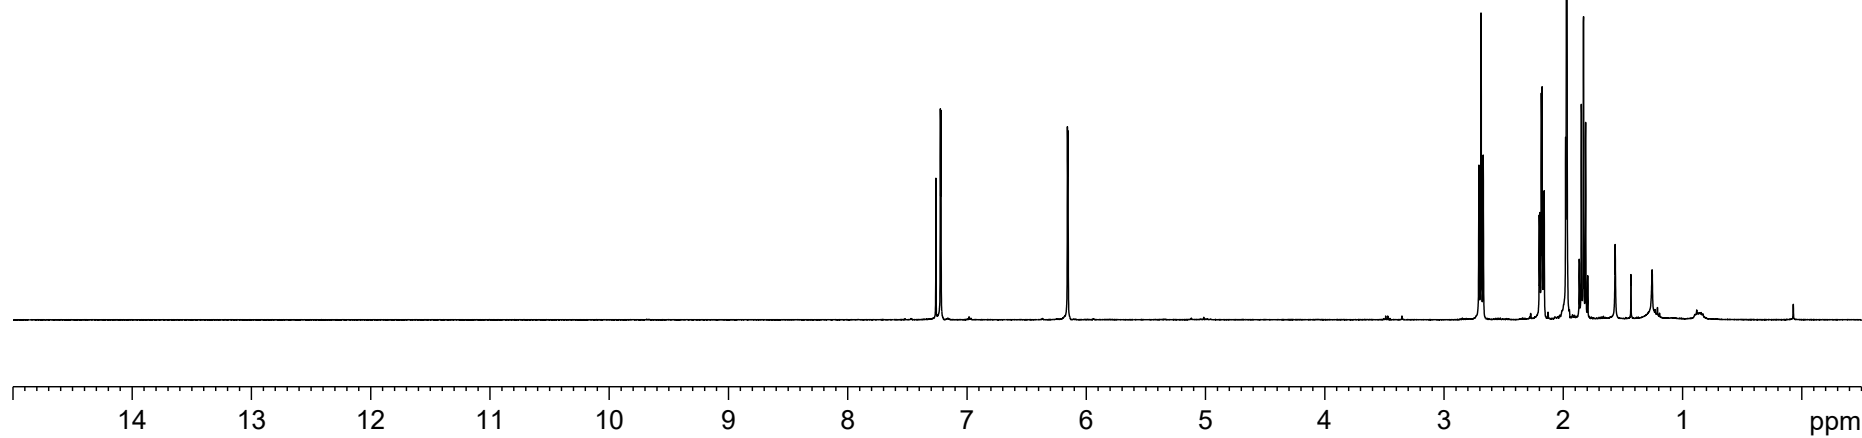

1.00

1.02

2.13

2.21

4.19

2.19

NAME JL3059a 13C  
EXPNO 1  
PROCNO 1  
Date\_ 20170514  
Time 16.55  
INSTRUM spect  
PROBHD 5 mm PABBO BB-  
PULPROG zgpg30  
TD 65536  
SOLVENT CDCl3  
NS 1024  
DS 4  
SWH 24038.461 Hz  
FIDRES 0.366798 Hz  
AQ 1.3631988 sec  
RG 203  
DW 20.800 usec  
DE 6.50 usec  
TE 294.4 K  
D1 2.00000000 sec  
D11 0.03000000 sec  
TD0 1

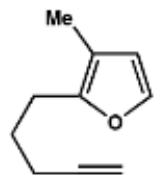

S6: C<sub>10</sub>H<sub>12</sub>O  
MW: 148.21

===== CHANNEL f1 =====  
NUC1 13C  
P1 10.00 usec  
PL1 -1.78 dB  
PL1W 47.30532455 W  
SFO1 100.6328888 MHz

===== CHANNEL f2 =====  
CPDPRG2 waltz16  
NUC2 1H  
PCPD2 80.00 usec  
PL2 -2.78 dB  
PL12 15.28 dB  
PL13 18.00 dB  
PL2W 27.10892296 W  
PL12W 0.42375252 W  
PL13W 0.22652298 W  
SFO2 400.1716007 MHz  
SI 32768  
SF 100.6228270 MHz  
WDW EM  
SSB 0  
LB 1.00 Hz  
GB 0  
PC 1.40

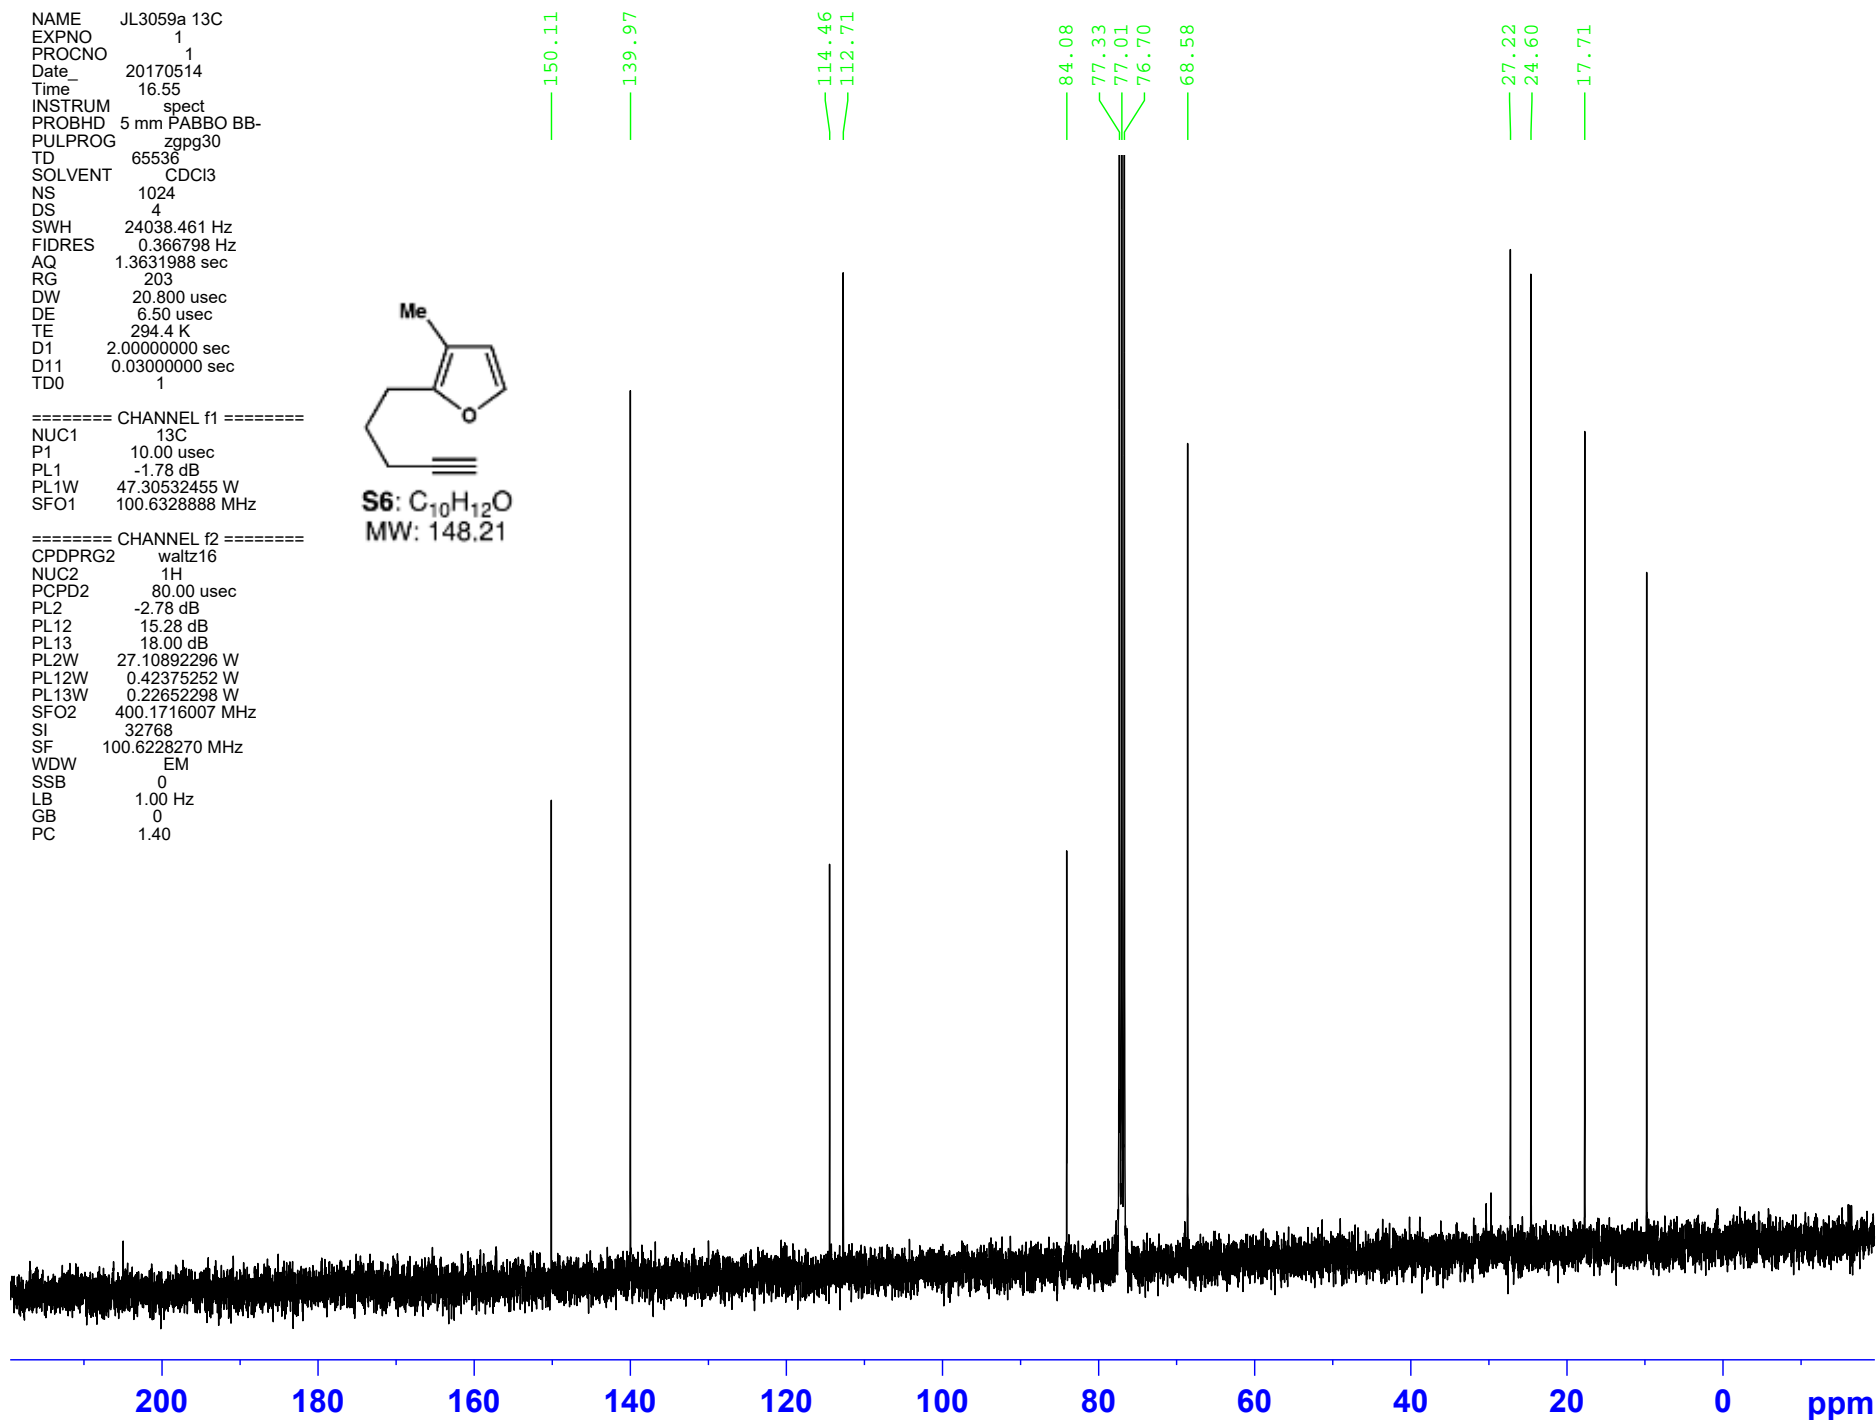

NAME JL3043b 1H  
EXPNO 3  
PROCNO 1  
Date\_ 20170503  
Time 16.18  
INSTRUM spect  
PROBHD 5 mm PABBO BB-  
PULPROG zg30  
TD 65536  
SOLVENT CDCl3  
NS 8  
DS 2  
SWH 8223.685 Hz  
FIDRES 0.125483 Hz  
AQ 3.9846387 sec  
RG 203  
DW 60.800 usec  
DE 6.50 usec  
TE 293.7 K  
D1 1.00000000 sec  
TD0 1

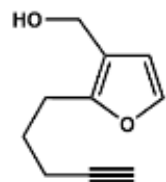

S7: C<sub>10</sub>H<sub>12</sub>O<sub>2</sub>  
MW: 164.20

===== CHANNEL f1 =====  
NUC1 1H  
P1 10.00 usec  
PL1 -2.78 dB  
PL1W 27.10892296 W  
SFO1 400.1724712 MHz  
SI 32768  
SF 400.1700088 MHz  
WDW EM  
SSB 0  
LB 0.30 Hz  
GB 0  
PC 1.00

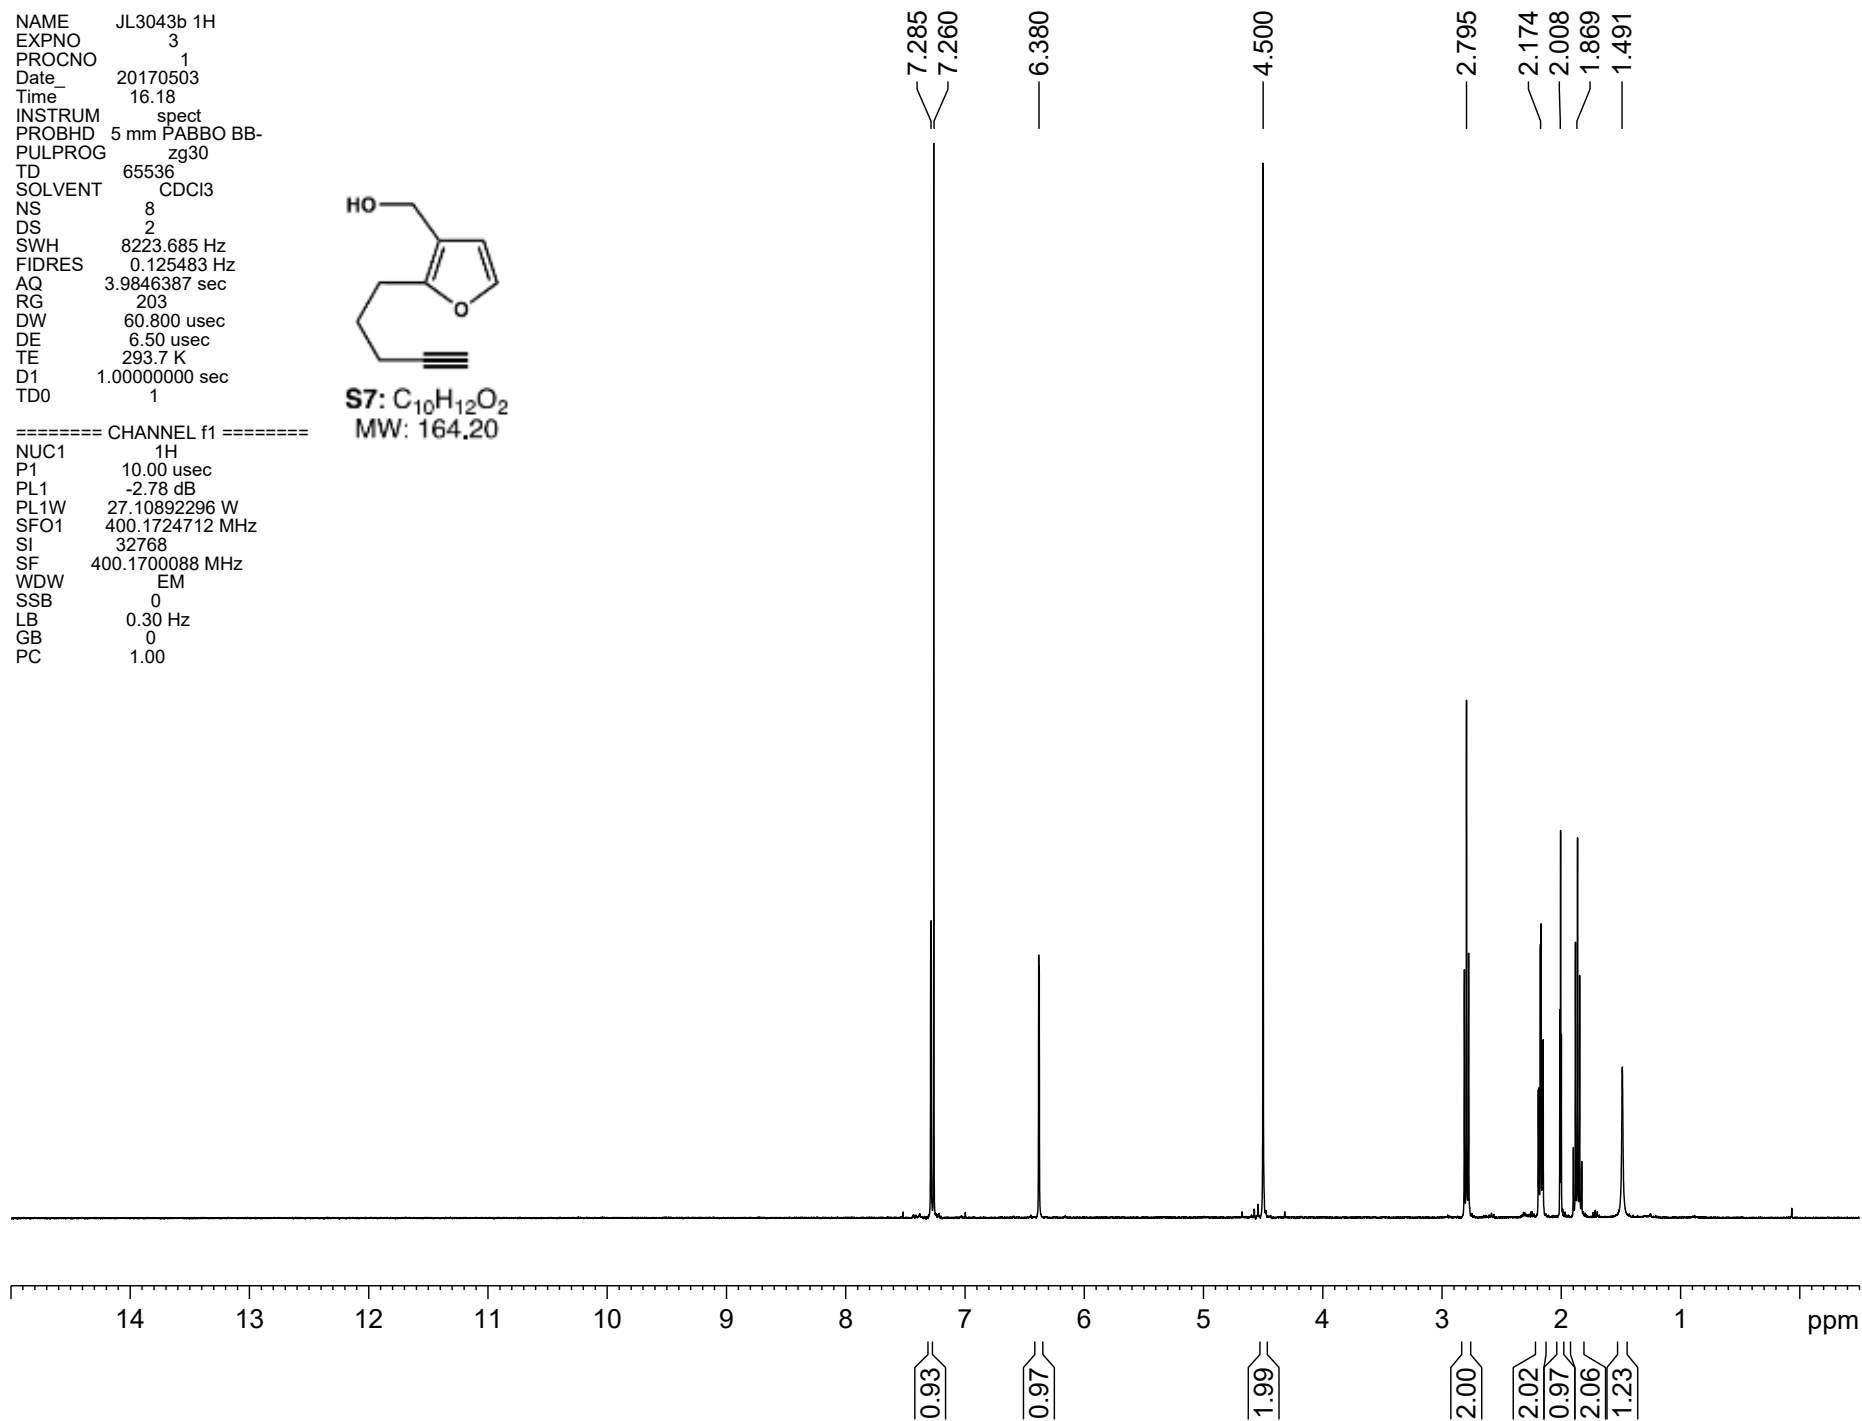



NAME JL3043b 13C  
 EXPNO 1  
 PROCNO 1  
 Date\_ 20170503  
 Time 17.06  
 INSTRUM spect  
 PROBHD 5 mm PABBO BB-  
 PULPROG zgpg30  
 TD 65536  
 SOLVENT CDCl3  
 NS 65  
 DS 4  
 SWH 24038.461 Hz  
 FIDRES 0.366798 Hz  
 AQ 1.3631988 sec  
 RG 203  
 DW 20.800 usec  
 DE 6.50 usec  
 TE 294.5 K  
 D1 2.00000000 sec  
 D11 0.03000000 sec  
 TD0 1

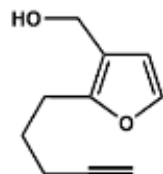

**S7: C<sub>10</sub>H<sub>12</sub>O<sub>2</sub>**  
**MW: 164.20**

===== CHANNEL f1 =====  
 NUC1 13C  
 P1 10.00 usec  
 PL1 -1.78 dB  
 PL1W 47.30532455 W  
 SFO1 100.6328888 MHz

===== CHANNEL f2 =====  
 CPDPRG2 waltz16  
 NUC2 1H  
 PCPD2 80.00 usec  
 PL2 -2.78 dB  
 PL12 15.28 dB  
 PL13 18.00 dB  
 PL2W 27.10892296 W  
 PL12W 0.42375252 W  
 PL13W 0.22652298 W  
 SFO2 400.1716007 MHz  
 SI 32768  
 SF 100.6228270 MHz  
 WDW EM  
 SSB 0  
 LB 1.00 Hz  
 GB 0  
 PC 1.40

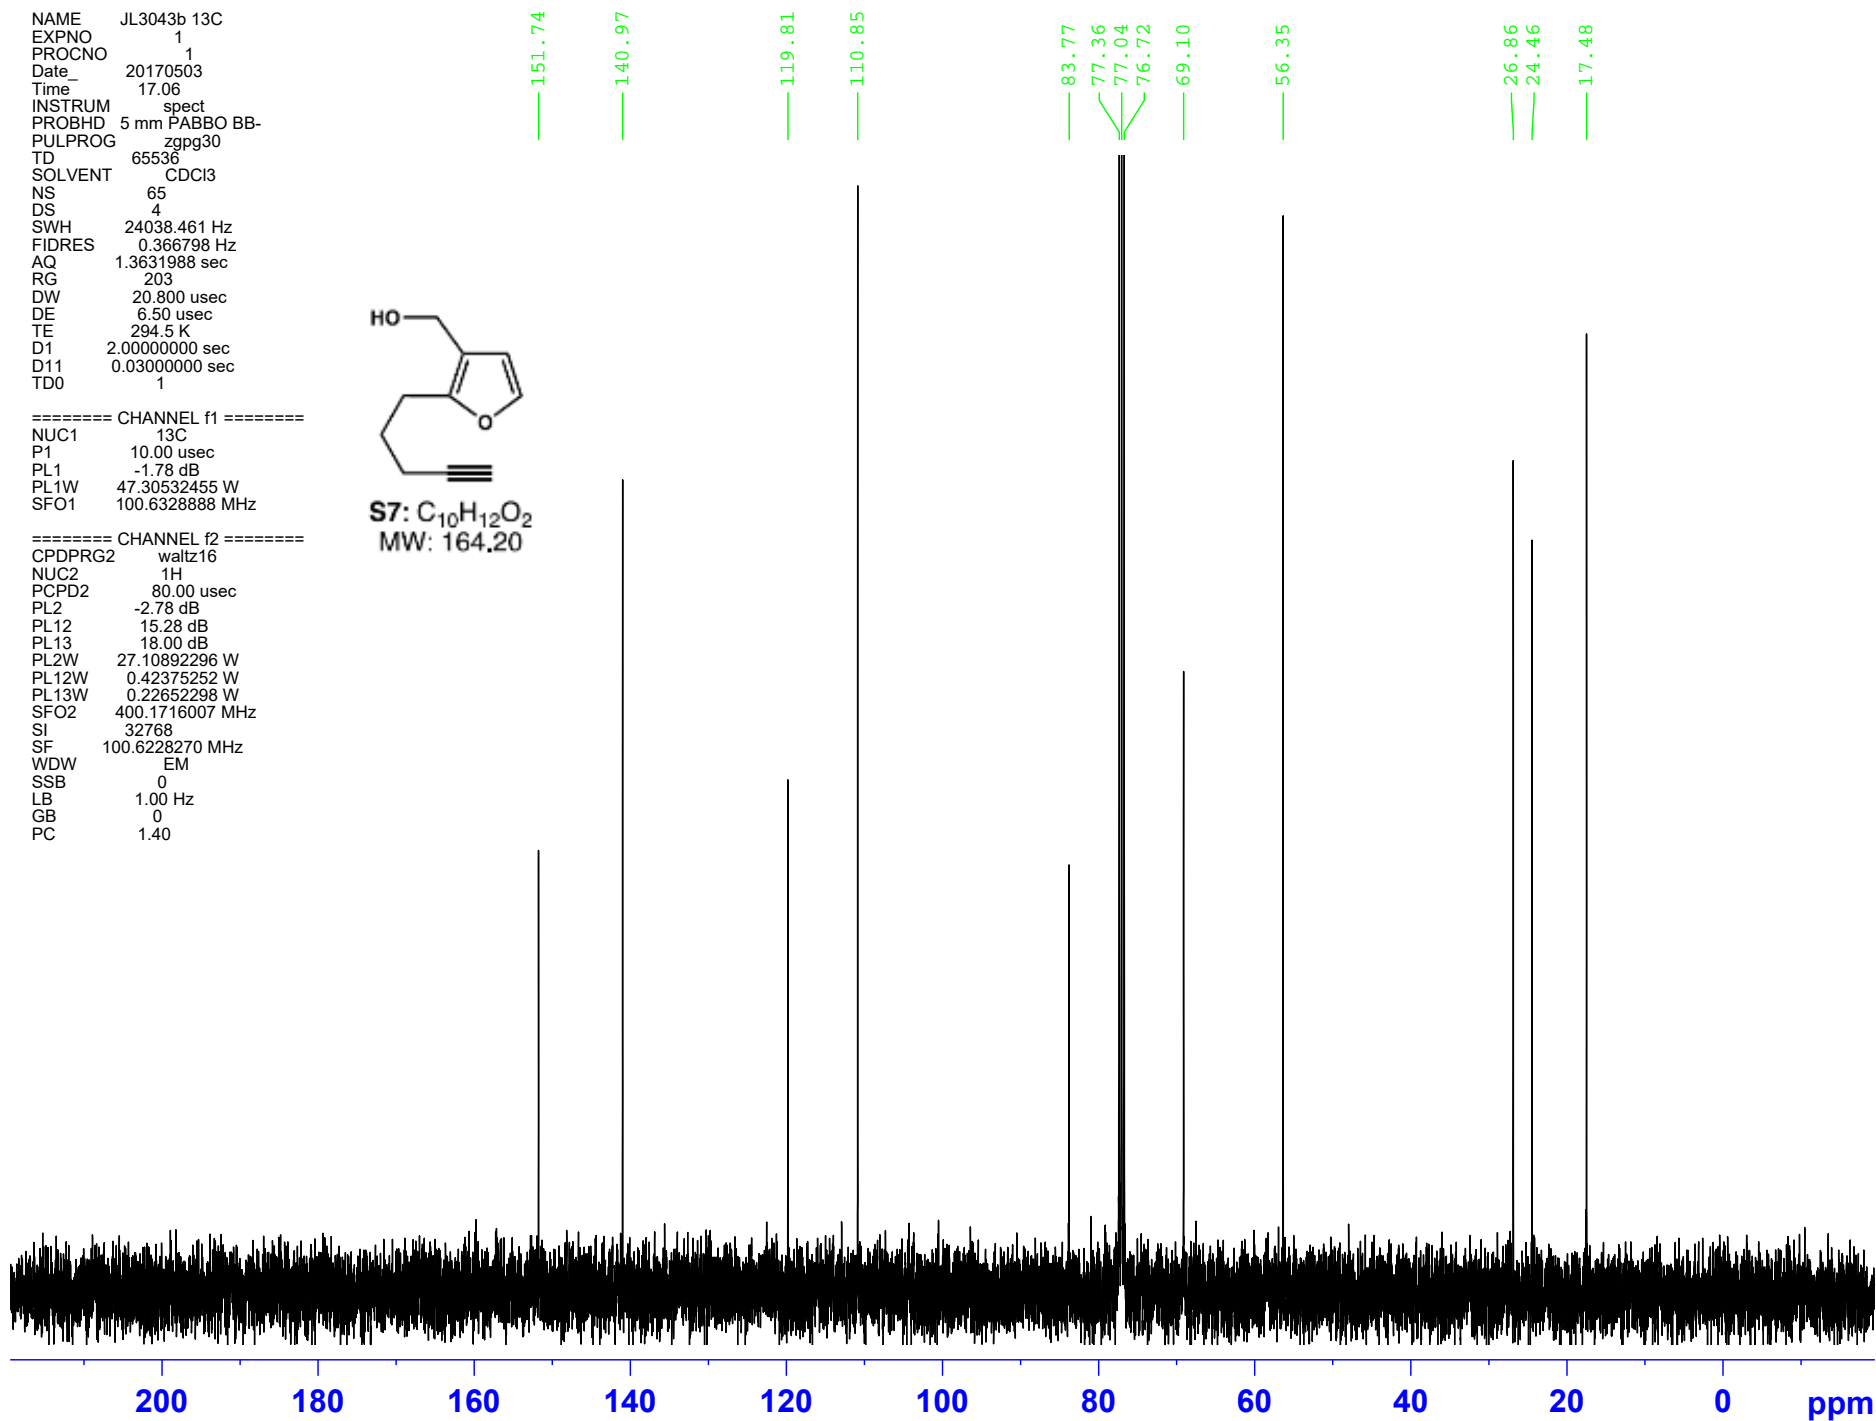

NAME JL3042a 1H  
EXPNO 1  
PROCNO 1  
Date\_ 20170503  
Time 16.13  
INSTRUM spect  
PROBHD 5 mm PABBO BB-  
PULPROG zg30  
TD 65536  
SOLVENT CDCl3  
NS 8  
DS 2  
SWH 8223.685 Hz  
FIDRES 0.125483 Hz  
AQ 3.9846387 sec  
RG 203  
DW 60.800 usec  
DE 6.50 usec  
TE 293.7 K  
D1 1.00000000 sec  
TD0 1

===== CHANNEL f1 =====  
NUC1 1H  
P1 10.00 usec  
PL1 -2.78 dB  
PL1W 27.10892296 W  
SFO1 400.1724712 MHz  
SI 32768  
SF 400.1700088 MHz  
WDW EM  
SSB 0  
LB 0.30 Hz  
GB 0  
PC 1.00

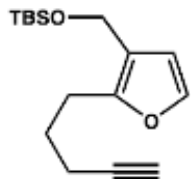

S8: C<sub>16</sub>H<sub>26</sub>O<sub>2</sub>Si  
MW: 278.47

7.260  
7.247  
6.321  
4.523  
2.739  
2.189  
1.973  
1.843  
0.908  
0.081

S39

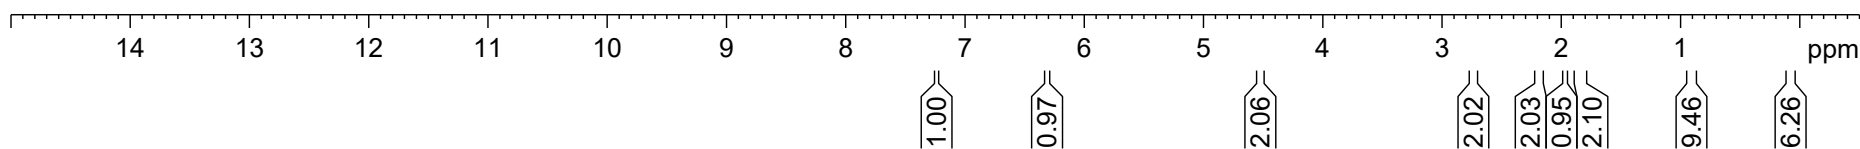

NAME JL3042a 13C  
 EXPNO 1  
 PROCNO 1  
 Date\_ 20170503  
 Time 16.44  
 INSTRUM spect  
 PROBHD 5 mm PABBO BB-  
 PULPROG zgpg30  
 TD 65536  
 SOLVENT CDCl3  
 NS 129  
 DS 4  
 SWH 24038.461 Hz  
 FIDRES 0.366798 Hz  
 AQ 1.3631988 sec  
 RG 203  
 DW 20.800 usec  
 DE 6.50 usec  
 TE 294.3 K  
 D1 2.00000000 sec  
 D11 0.03000000 sec  
 TD0 1

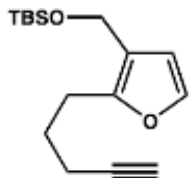

**S8:** C<sub>16</sub>H<sub>26</sub>O<sub>2</sub>Si  
 MW: 278.47

===== CHANNEL f1 =====  
 NUC1 13C  
 P1 10.00 usec  
 PL1 -1.78 dB  
 PL1W 47.30532455 W  
 SFO1 100.6328888 MHz

===== CHANNEL f2 =====  
 CPDPRG2 waltz16  
 NUC2 1H  
 PCPD2 80.00 usec  
 PL2 -2.78 dB  
 PL12 15.28 dB  
 PL13 18.00 dB  
 PL2W 27.10892296 W  
 PL12W 0.42375252 W  
 PL13W 0.22652298 W  
 SFO2 400.1716007 MHz  
 SI 32768  
 SF 100.6228270 MHz  
 WDW EM  
 SSB 0  
 LB 1.00 Hz  
 GB 0  
 PC 1.40

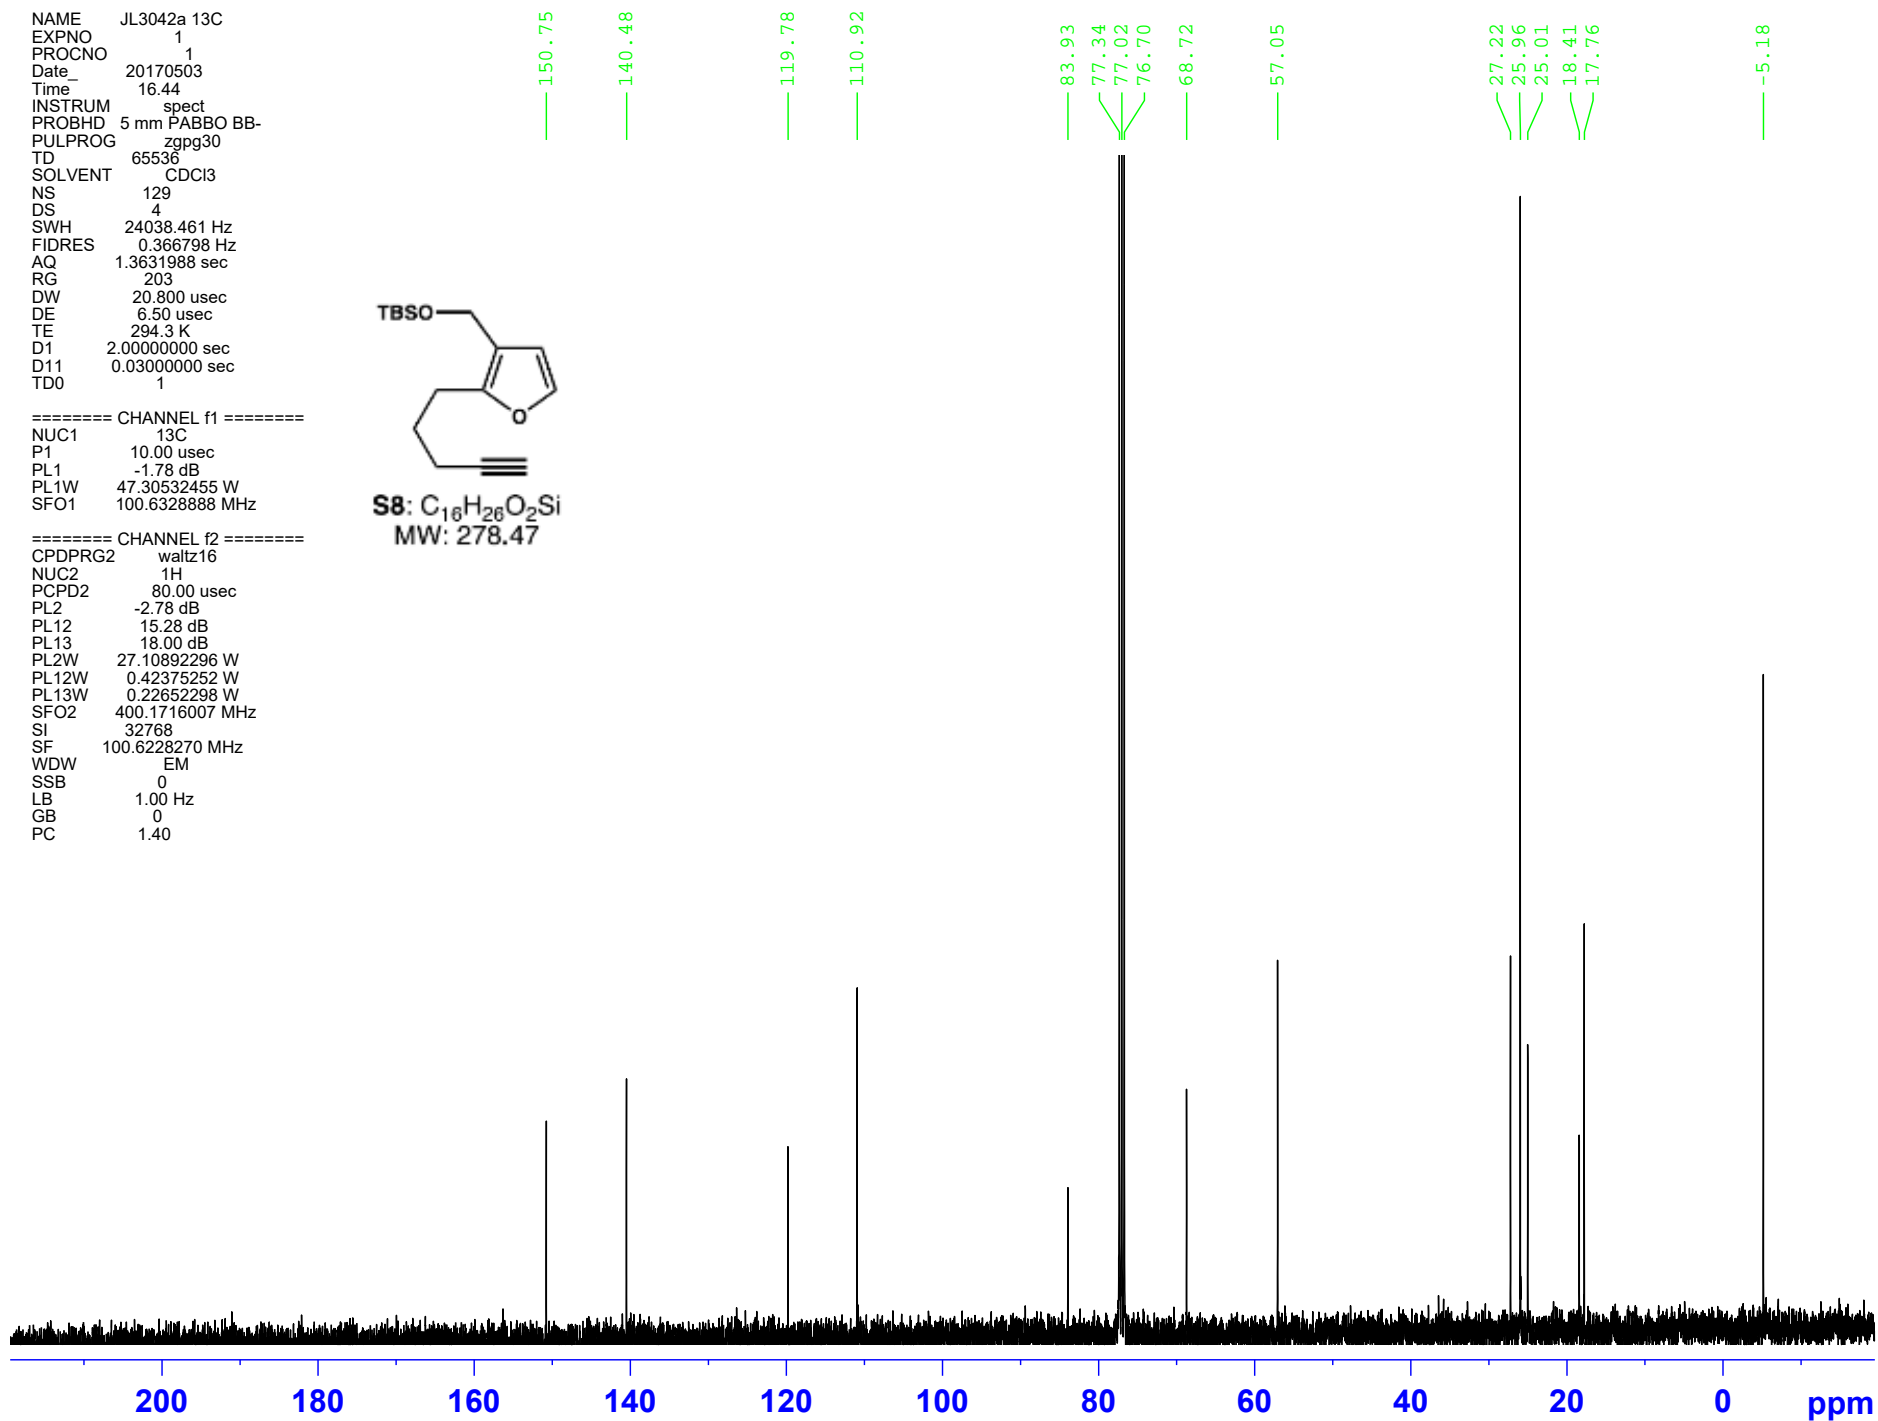

NAME AES 2167b  
 EXPNO 1  
 PROCNO 1  
 Date\_ 20160429  
 Time 23.55  
 INSTRUM spect  
 PROBHD 5 mm PABBO BB-  
 PULPROG zg30  
 TD 65536  
 SOLVENT CDCl3  
 NS 8  
 DS 2  
 SWH 8223.685 Hz  
 FIDRES 0.125483 Hz  
 AQ 3.9846387 sec  
 RG 203  
 DW 60.800 usec  
 DE 6.50 usec  
 TE 293.9 K  
 D1 1.00000000 sec  
 TD0 1

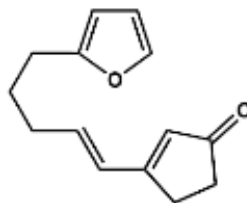

4: C<sub>14</sub>H<sub>16</sub>O<sub>2</sub>  
 MW: 216.28

===== CHANNEL f1 =====  
 NUC1 1H  
 P1 10.00 usec  
 PL1 -2.78 dB  
 PL1W 27.10892296 W  
 SFO1 400.1724712 MHz  
 SI 32768  
 SF 400.1700088 MHz  
 WDW EM  
 SSB 0  
 LB 0.30 Hz  
 GB 0  
 PC 1.00

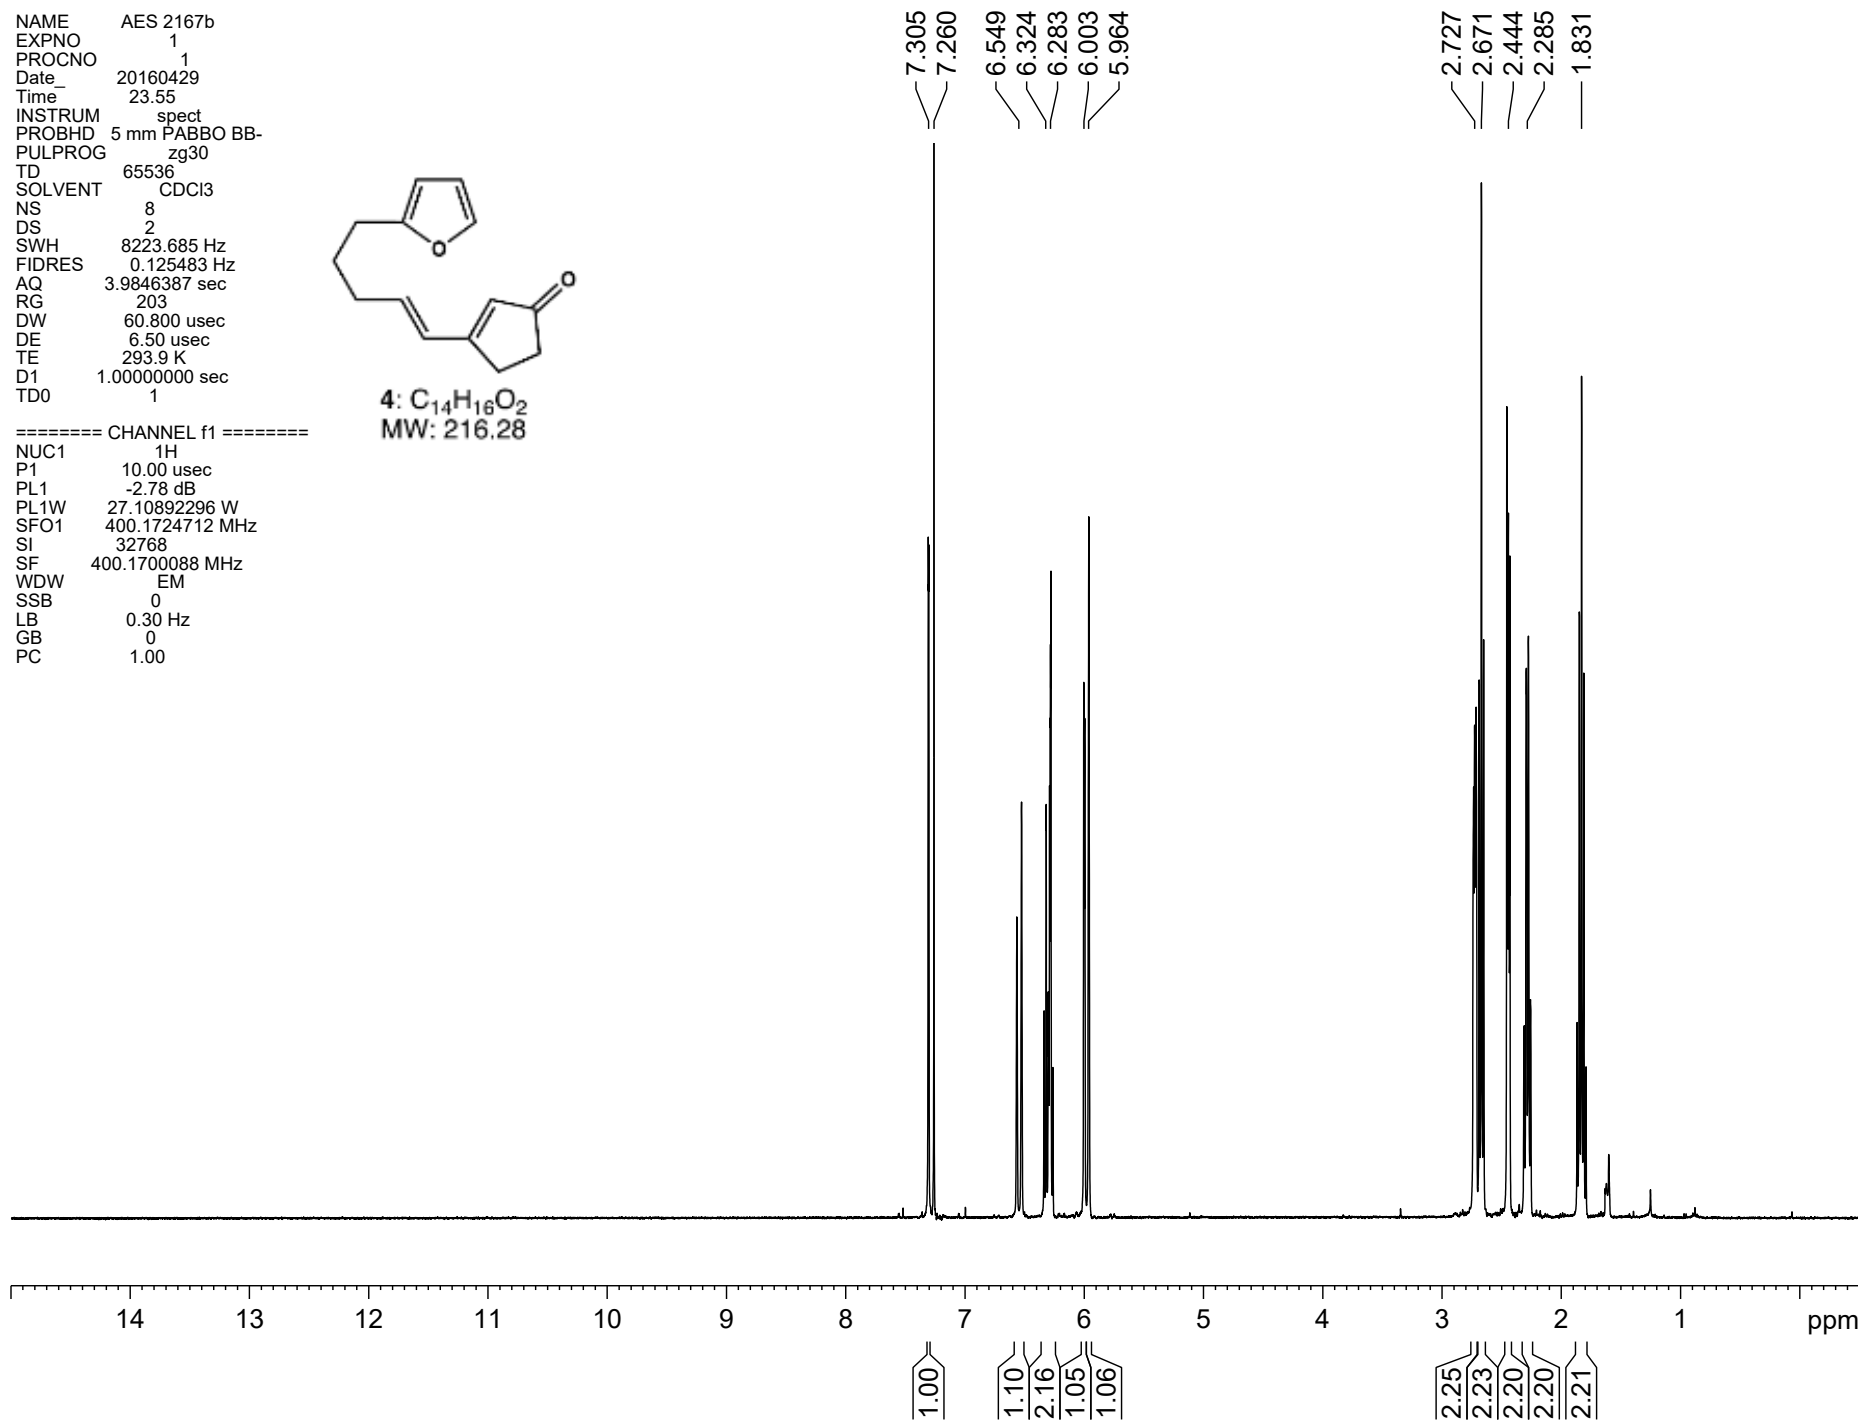

NAME AES 2027 C13  
 EXPNO 1  
 PROCNO 1  
 Date\_ 20151210  
 Time 20.34  
 INSTRUM spect  
 PROBHD 5 mm PABBO BB-  
 PULPROG zgpg30  
 TD 65536  
 SOLVENT CDCl3  
 NS 256  
 DS 4  
 SWH 24038.461 Hz  
 FIDRES 0.366798 Hz  
 AQ 1.3631988 sec  
 RG 144  
 DW 20.800 usec  
 DE 6.50 usec  
 TE 294.6 K  
 D1 2.00000000 sec  
 D11 0.03000000 sec  
 TD0 1

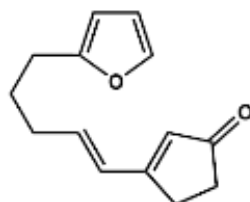

===== CHANNEL f1 =====  
 NUC1 13C  
 P1 10.00 usec  
 PL1 -1.78 dB  
 PL1W 47.30532455 W  
 SFO1 100.6328888 MHz

===== CHANNEL f2 =====  
 CPDPRG2 waltz16  
 NUC2 1H  
 PCPD2 80.00 usec  
 PL2 -2.78 dB  
 PL12 15.28 dB  
 PL13 18.00 dB  
 PL2W 27.10892296 W  
 PL12W 0.42375252 W  
 PL13W 0.22652298 W  
 SFO2 400.1716007 MHz  
 SI 32768  
 SF 100.6228270 MHz  
 WDW EM  
 SSB 0  
 LB 1.00 Hz  
 GB 0  
 PC 1.40

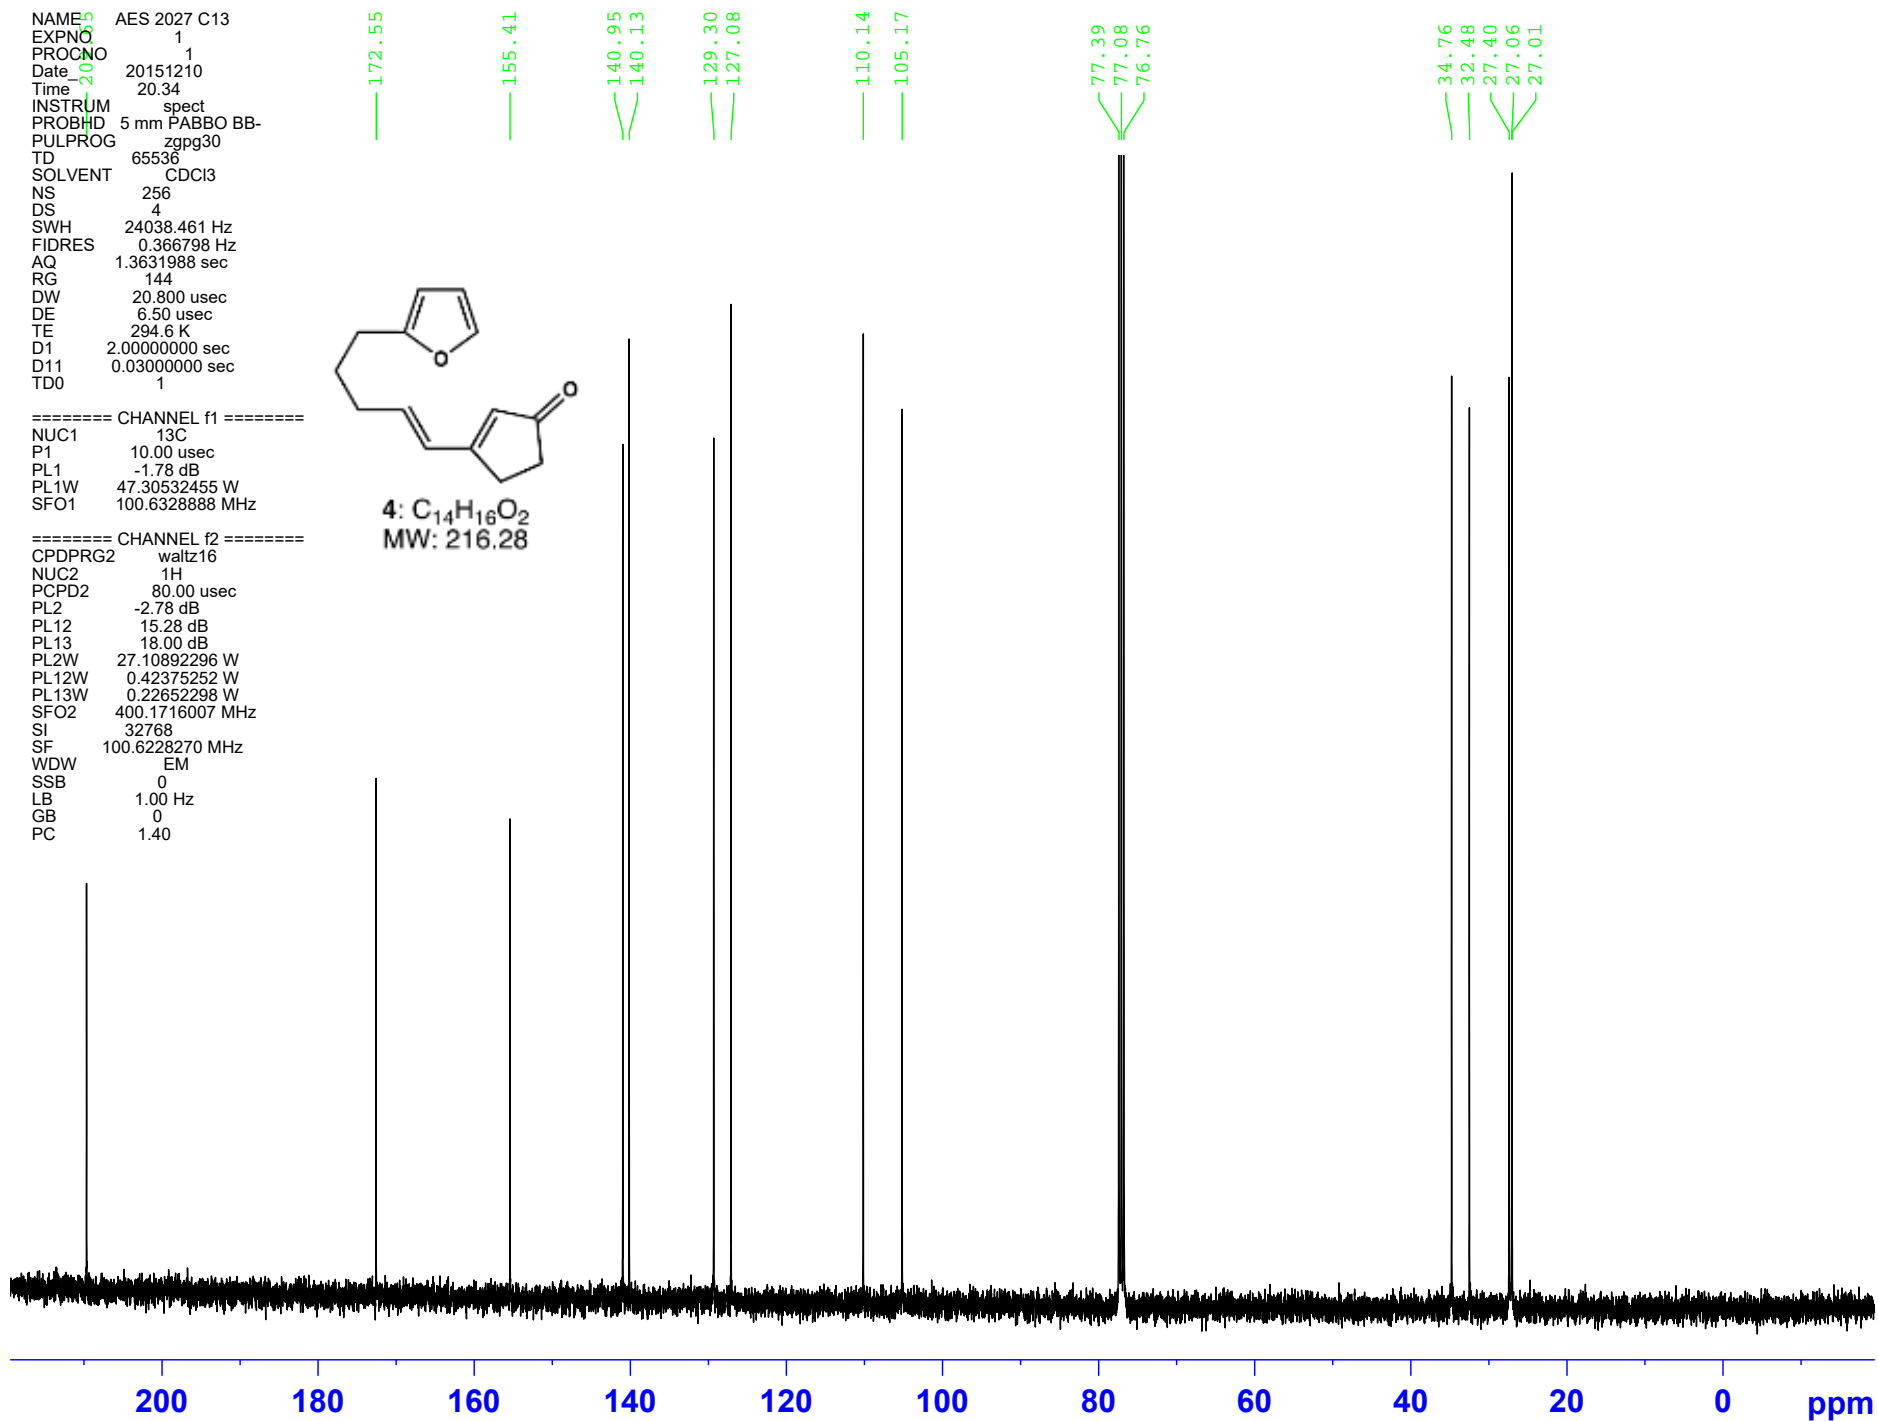



NAME AES 2136 column  
EXPNO 1  
PROCNO 1  
Date\_ 20160326  
Time 15.44  
INSTRUM spect  
PROBHD 5 mm PABBO BB-  
PULPROG zg30  
TD 65536  
SOLVENT CDCl3  
NS 8  
DS 2  
SWH 8223.685 Hz  
FIDRES 0.125483 Hz  
AQ 3.9846387 sec  
RG 203  
DW 60.800 usec  
DE 6.50 usec  
TE 293.9 K  
D1 1.00000000 sec  
TD0 1

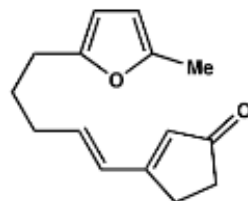

**12a:** C<sub>15</sub>H<sub>18</sub>O<sub>2</sub>  
MW: 230.31

===== CHANNEL f1 =====  
NUC1 1H  
P1 10.00 usec  
PL1 -2.78 dB  
PL1W 27.10892296 W  
SFO1 400.1724712 MHz  
SI 32768  
SF 400.1700088 MHz  
WDW EM  
SSB 0  
LB 0.30 Hz  
GB 0  
PC 1.00

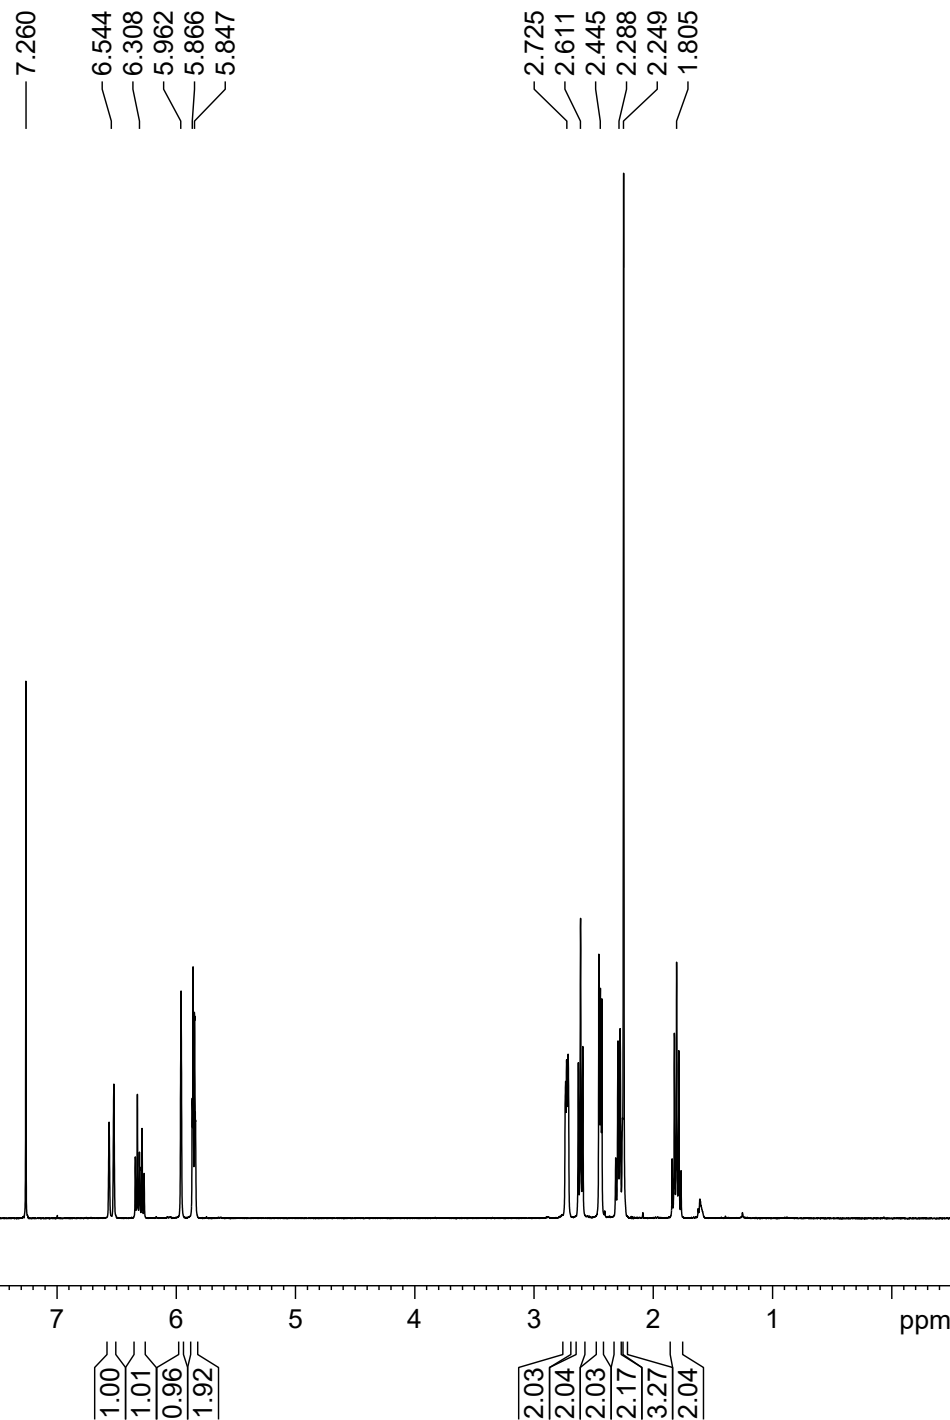

NAME: AES 2134 C13 li\_hal exchange  
 EXPNO: 1  
 PROCNO: 1  
 Date\_20: 20160328  
 Time: 14.44  
 INSTRUM: spect  
 PROBHD: 5 mm PABBO BB-  
 PULPROG: zgpg30  
 TD: 65536  
 SOLVENT: CDCl3  
 NS: 256  
 DS: 4  
 SWH: 24038.461 Hz  
 FIDRES: 0.366798 Hz  
 AQ: 1.3631988 sec  
 RG: 203  
 DW: 20.800 usec  
 DE: 6.50 usec  
 TE: 295.1 K  
 D1: 2.00000000 sec  
 D11: 0.03000000 sec  
 TD0: 1

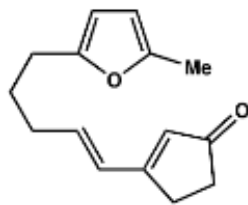

===== CHANNEL f1 =====  
 NUC1: 13C  
 P1: 10.00 usec  
 PL1: -1.78 dB  
 PL1W: 47.30532455 W  
 SFO1: 100.6328888 MHz

===== CHANNEL f2 =====  
 CPDPRG2: waltz16  
 NUC2: 1H  
 PCPD2: 80.00 usec  
 PL2: -2.78 dB  
 PL12: 15.28 dB  
 PL13: 18.00 dB  
 PL2W: 27.10892296 W  
 PL12W: 0.42375252 W  
 PL13W: 0.22652298 W  
 SFO2: 400.1716007 MHz  
 SI: 32768  
 SF: 100.6228270 MHz  
 WDW: EM  
 SSB: 0  
 LB: 1.00 Hz  
 GB: 0  
 PC: 1.40

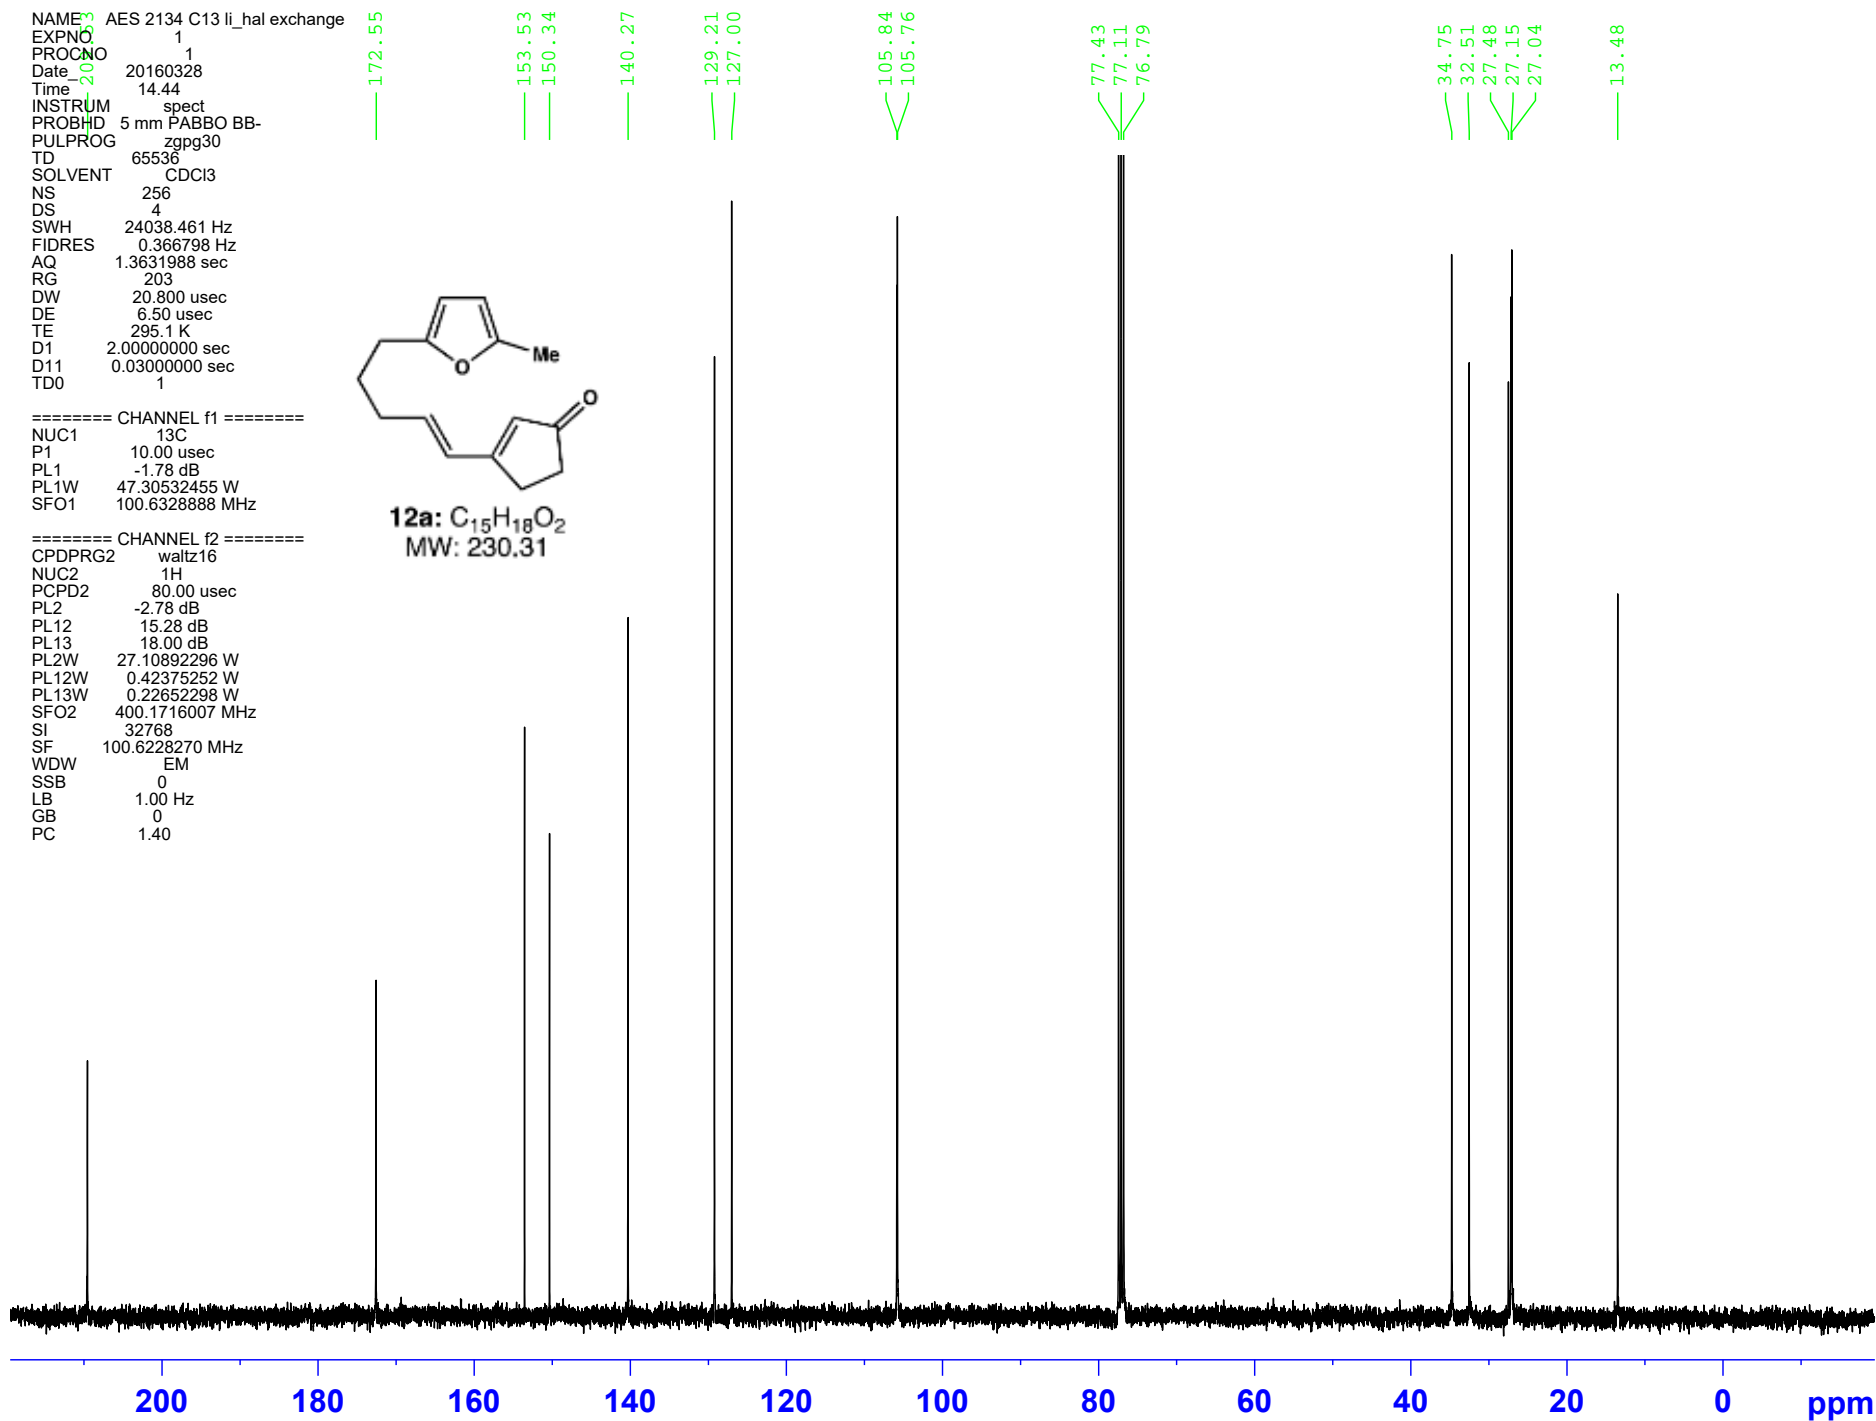

NAME JAL2109D 1H  
 EXPNO 3  
 PROCNO 1  
 Date\_ 20170808  
 Time 15.52  
 INSTRUM spect  
 PROBHD 5 mm PABBO BB-  
 PULPROG zg30  
 TD 65536  
 SOLVENT CDCl3  
 NS 8  
 DS 2  
 SWH 8223.685 Hz  
 FIDRES 0.125483 Hz  
 AQ 3.9846387 sec  
 RG 203  
 DW 60.800 usec  
 DE 6.50 usec  
 TE 295.9 K  
 D1 1.00000000 sec  
 TD0 1

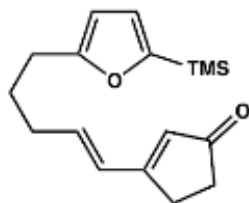

**12b**: C<sub>17</sub>H<sub>24</sub>O<sub>2</sub>Si  
 MW: 288.46

===== CHANNEL f1 =====  
 NUC1 1H  
 P1 10.00 usec  
 PL1 -2.78 dB  
 PL1W 27.10892296 W  
 SFO1 400.1724712 MHz  
 SI 32768  
 SF 400.1700083 MHz  
 WDW EM  
 SSB 0  
 LB 0.30 Hz  
 GB 0  
 PC 1.00

7.260  
 6.569  
 6.517  
 6.311  
 5.986  
 5.964

2.741  
 2.680  
 2.457  
 2.433  
 2.300  
 1.840

0.239

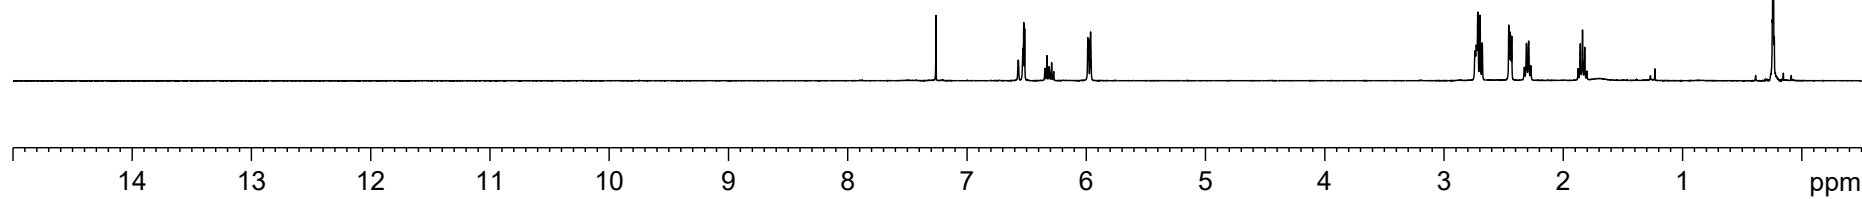

1.97  
 1.01  
 0.96  
 0.97

4.01  
 2.06  
 2.03  
 2.08

9.00

NAME JAL2018D 13C  
 EXPNO 2  
 PROCNO 1  
 Date\_ 20170315  
 Time 14.40  
 INSTRUM spect  
 PROBHD 5 mm PABBO BB-  
 PULPROG zgpg30  
 TD 65536  
 SOLVENT CDCl3  
 NS 41  
 DS 4  
 SWH 24038.461 Hz  
 FIDRES 0.366798 Hz  
 AQ 1.3631988 sec  
 RG 203  
 DW 20.800 usec  
 DE 6.50 usec  
 TE 293.2 K  
 D1 2.00000000 sec  
 D11 0.03000000 sec  
 TD0 1

172.39  
 159.70  
 158.27  
 140.14  
 129.14  
 127.01  
 120.42  
 105.21  
 77.70  
 77.38  
 77.06  
 34.65  
 32.54  
 27.54  
 27.04  
 26.96  
 -1.54

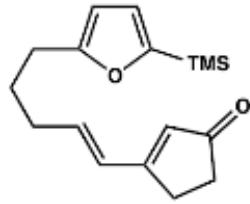

===== CHANNEL f1 =====  
 NUC1 13C  
 P1 10.00 usec  
 PL1 -1.78 dB  
 PL1W 47.30532455 W  
 SFO1 100.6328888 MHz

===== CHANNEL f2 =====  
 CPDPRG2 waltz16  
 NUC2 1H  
 PCPD2 80.00 usec  
 PL2 -2.78 dB  
 PL12 15.28 dB  
 PL13 18.00 dB  
 PL2W 27.10892296 W  
 PL12W 0.42375252 W  
 PL13W 0.22652298 W  
 SFO2 400.1716007 MHz  
 SI 32768  
 SF 100.6228270 MHz  
 WDW EM  
 SSB 0  
 LB 1.00 Hz  
 GB 0  
 PC 1.40

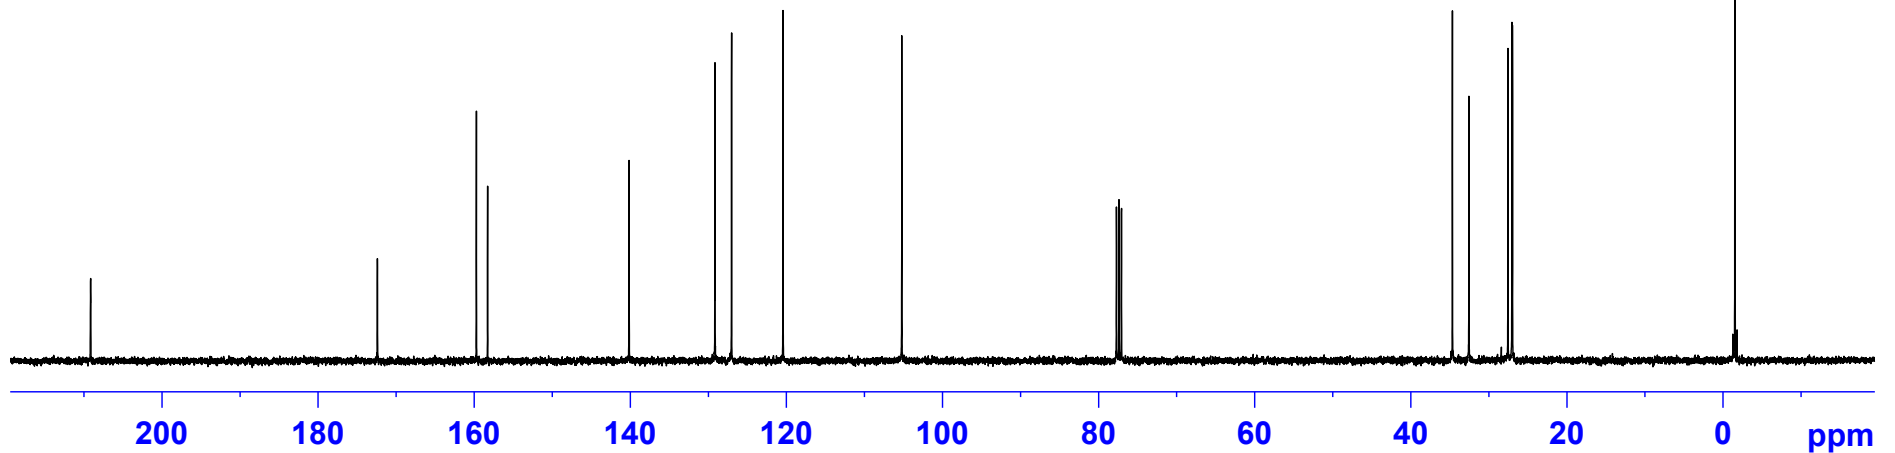

NAME AES 4028 column2  
 EXPNO 2  
 PROCNO 1  
 Date\_ 20170426  
 Time 21.14  
 INSTRUM spect  
 PROBHD 5 mm PABBO BB-  
 PULPROG zg30  
 TD 65536  
 SOLVENT CDCl3  
 NS 16  
 DS 2  
 SWH 8223.685 Hz  
 FIDRES 0.125483 Hz  
 AQ 3.9846387 sec  
 RG 203  
 DW 60.800 usec  
 DE 6.50 usec  
 TE 294.9 K  
 D1 1.00000000 sec  
 TD0 1

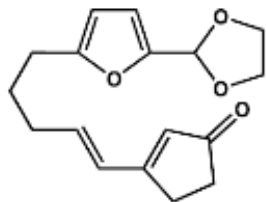

**12c**: C<sub>17</sub>H<sub>20</sub>O<sub>4</sub>  
 MW: 288.34

===== CHANNEL f1 =====  
 NUC1 1H  
 P1 10.00 usec  
 PL1 -2.78 dB  
 PL1W 27.10892296 W  
 SFO1 400.1724712 MHz  
 SI 32768  
 SF 400.1700088 MHz  
 WDW EM  
 SSB 0  
 LB 0.30 Hz  
 GB 0  
 PC 1.00

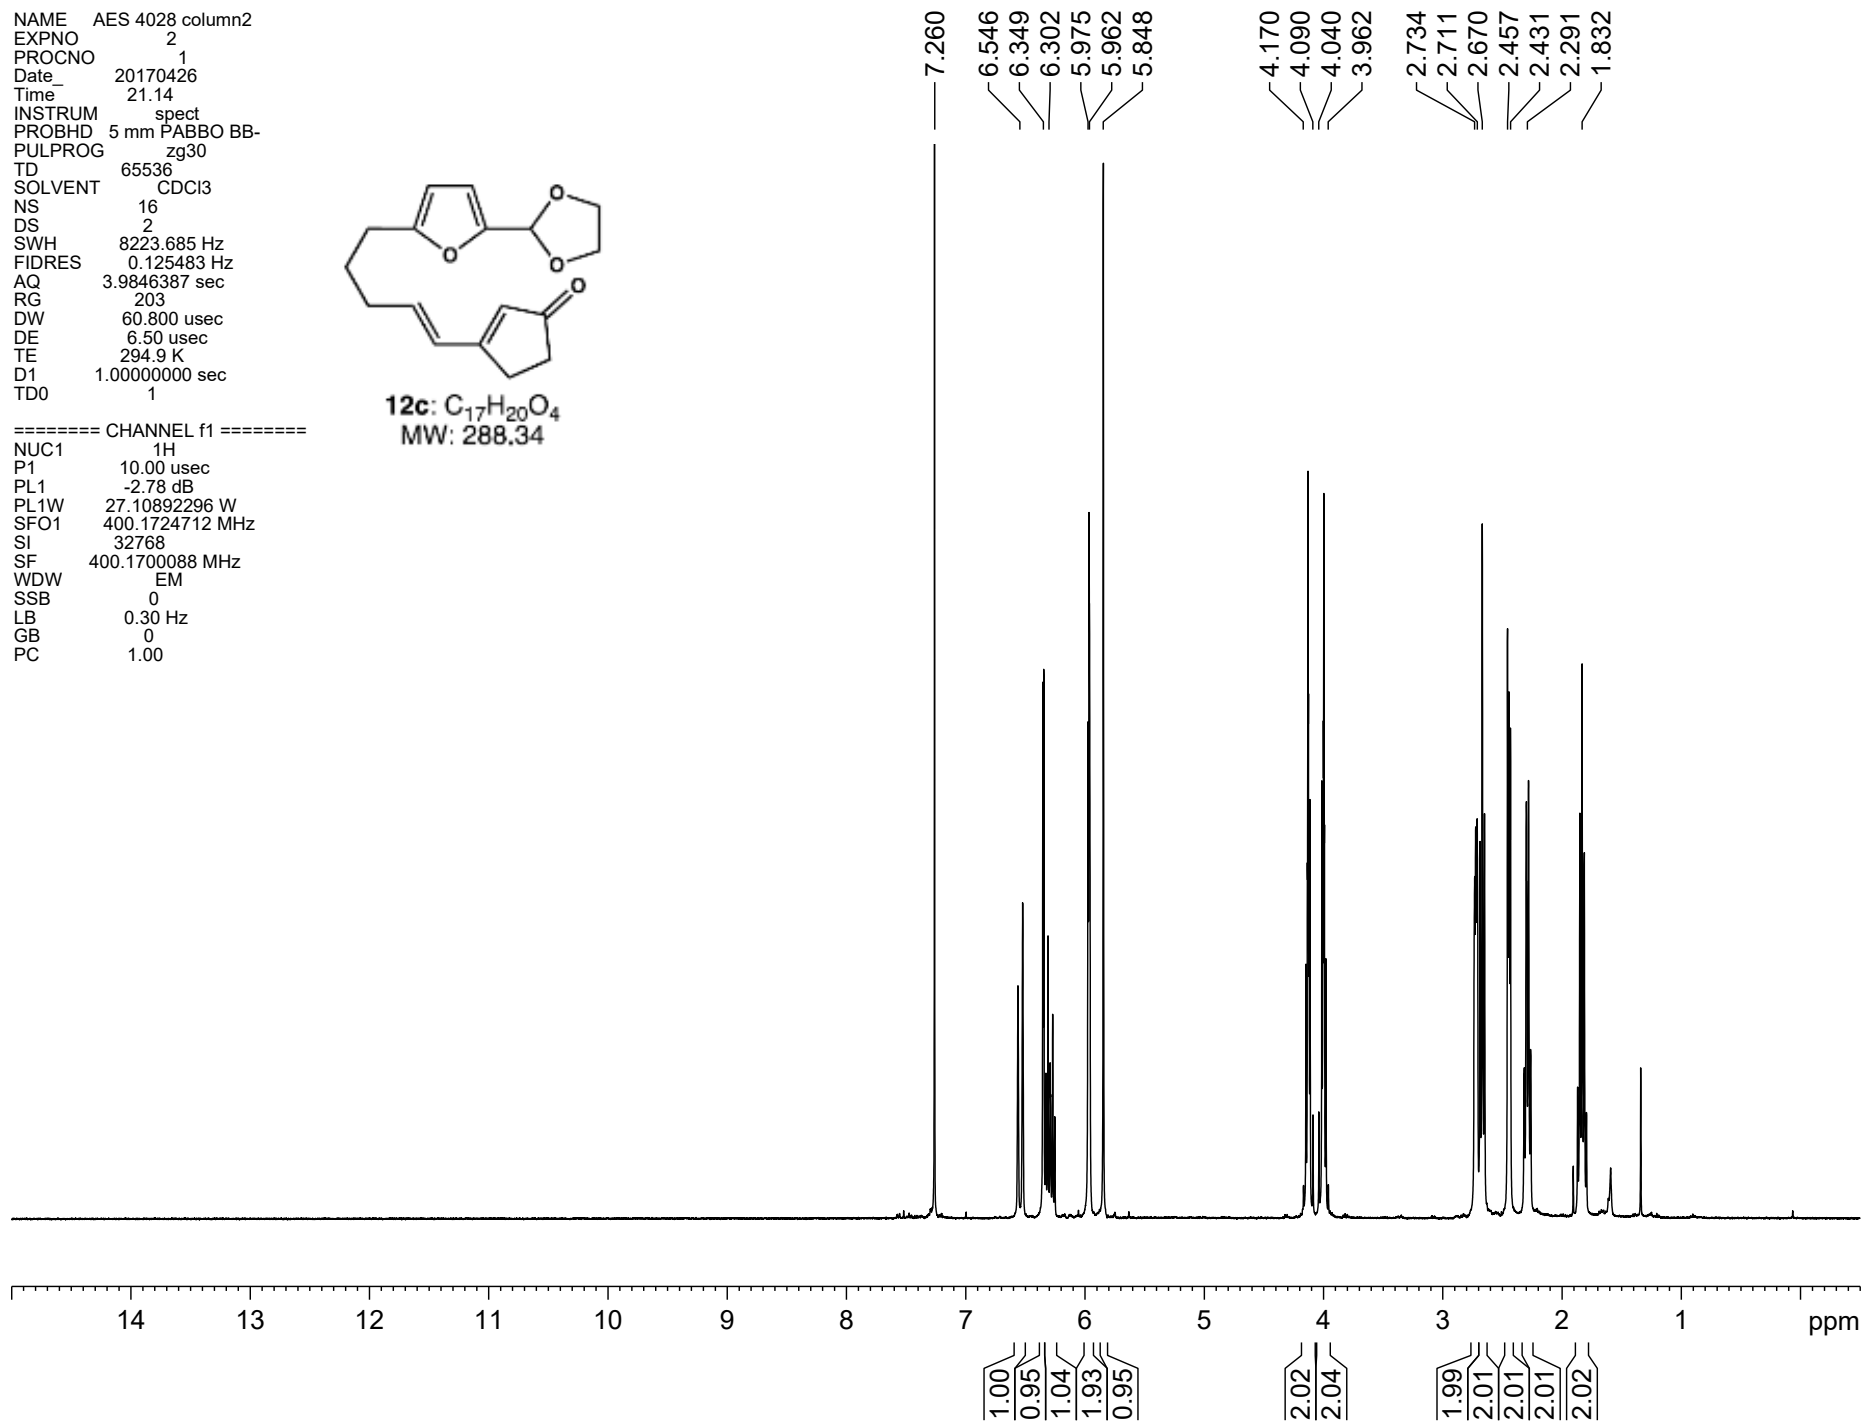

NAME JAL2015Db repurified 13C  
 EXPNO 2  
 PROCNO 1  
 Date\_ 20170315  
 Time 14.25  
 INSTRUM spect  
 PROBHD 5 mm PABBO BB-  
 PULPROG zgpg30  
 TD 65536  
 SOLVENT CDCl3  
 NS 50  
 DS 4  
 SWH 24038.461 Hz  
 FIDRES 0.366798 Hz  
 AQ 1.3631988 sec  
 RG 203  
 DW 20.800 usec  
 DE 6.50 usec  
 TE 293.2 K  
 D1 2.00000000 sec  
 D11 0.03000000 sec  
 TD0 1

172.46

156.21

149.19

139.96

129.07

127.01

109.47

105.72

97.65

77.77

77.45

77.13

64.94

34.64

32.37

27.36

26.91

26.72

===== CHANNEL f1 =====  
 NUC1 13C  
 P1 10.00 usec  
 PL1 -1.78 dB  
 PL1W 47.30532455 W  
 SFO1 100.6328888 MHz

===== CHANNEL f2 =====  
 CPDPRG2 waltz16  
 NUC2 1H  
 PCPD2 80.00 usec  
 PL2 -2.78 dB  
 PL12 15.28 dB  
 PL13 18.00 dB  
 PL2W 27.10892296 W  
 PL12W 0.42375252 W  
 PL13W 0.22652298 W  
 SFO2 400.1716007 MHz  
 SI 32768  
 SF 100.6228270 MHz  
 WDW EM  
 SSB 0  
 LB 1.00 Hz  
 GB 0  
 PC 1.40

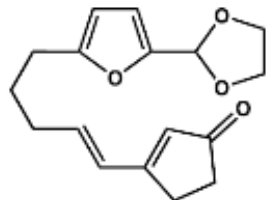

**12c: C<sub>17</sub>H<sub>20</sub>O<sub>4</sub>**  
**MW: 288.34**

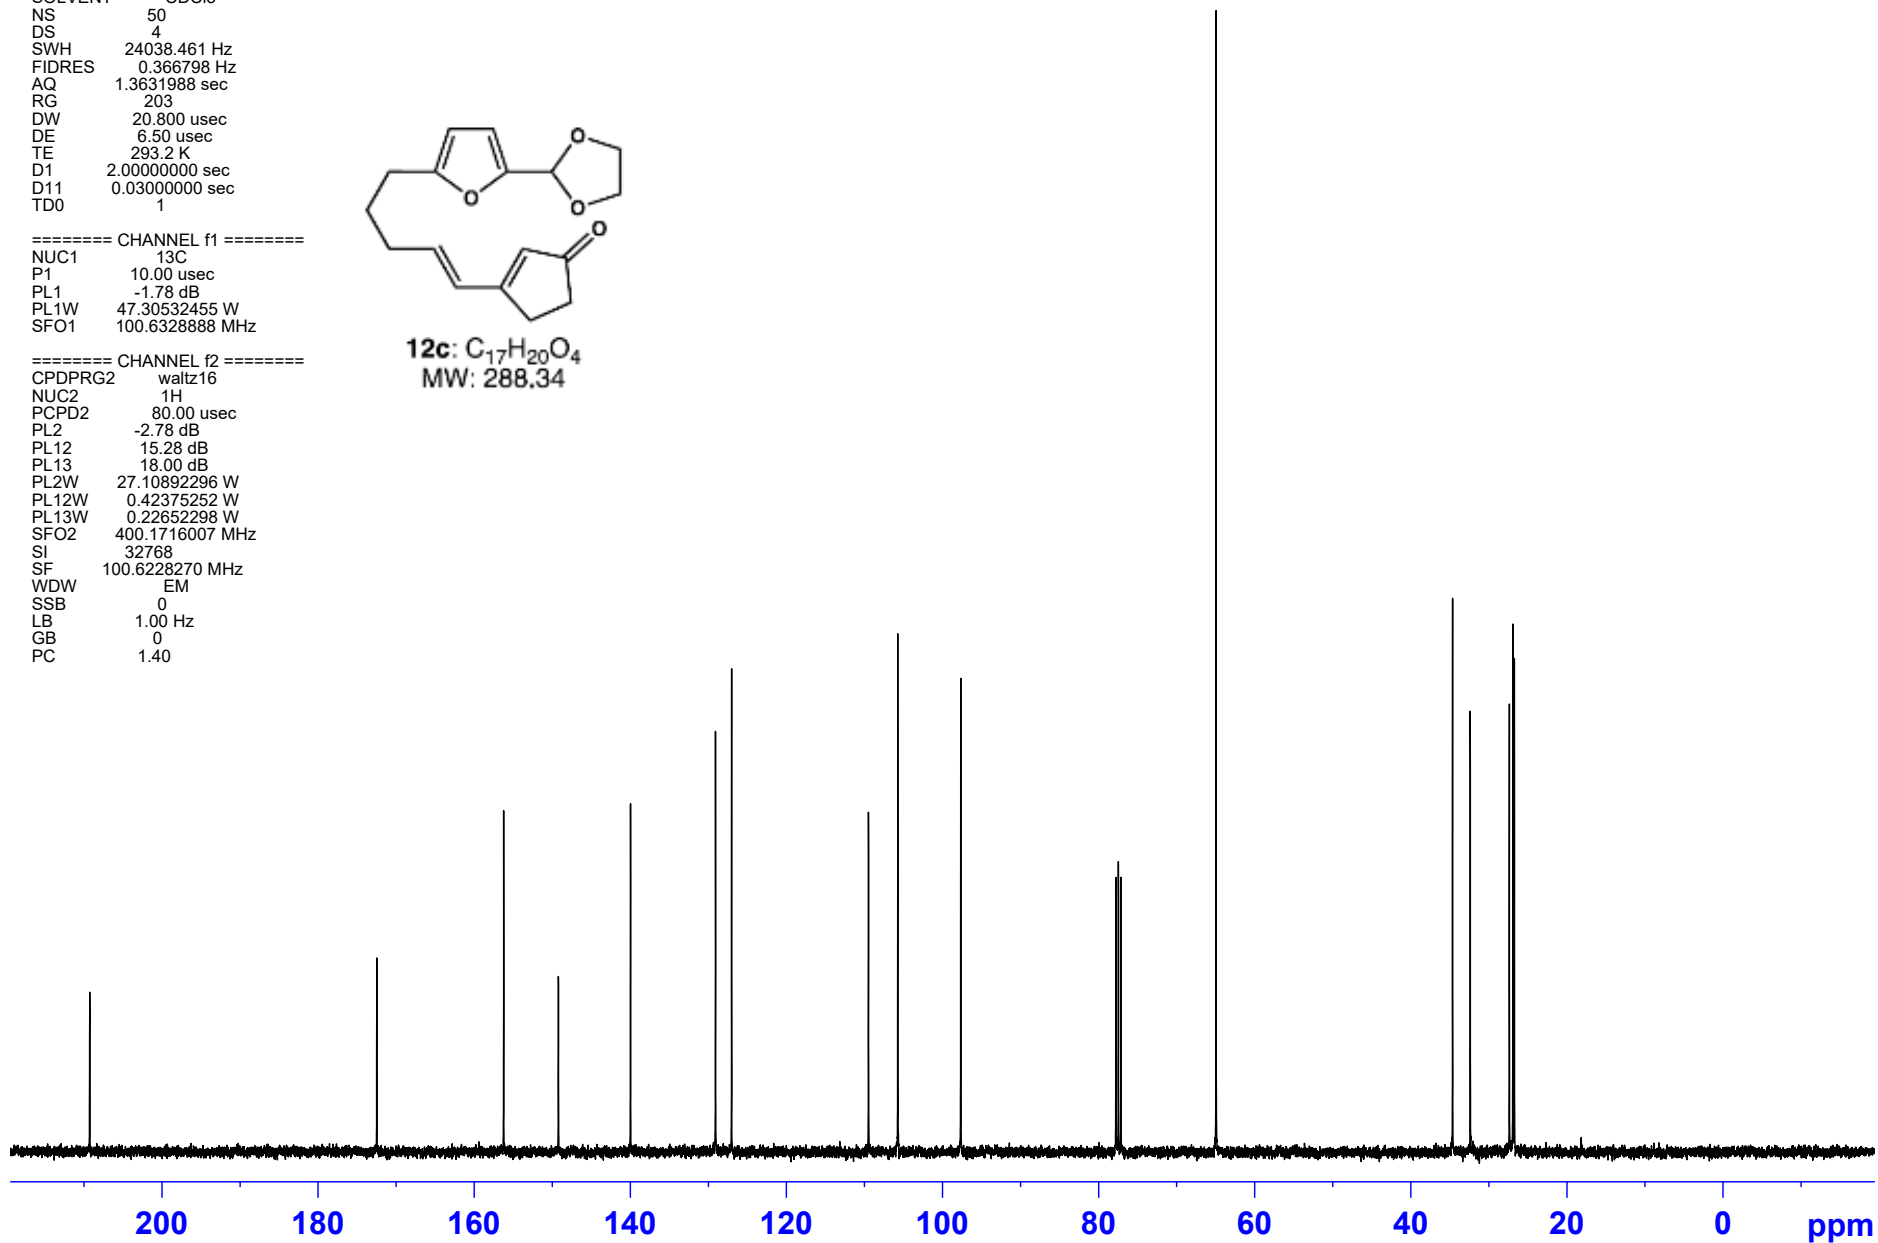

NAME JAL1067B  
 EXPNO 1  
 PROCNO 1  
 Date\_ 20160727  
 Time 19.09  
 INSTRUM spect  
 PROBHD 5 mm PABBO BB-  
 PULPROG zg30  
 TD 65536  
 SOLVENT CDCl3  
 NS 8  
 DS 2  
 SWH 8223.685 Hz  
 FIDRES 0.125483 Hz  
 AQ 3.9846387 sec  
 RG 50.8  
 DW 60.800 usec  
 DE 6.50 usec  
 TE 293.9 K  
 D1 1.00000000 sec  
 TD0 1

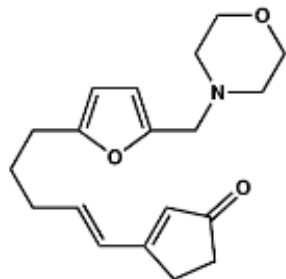

**12d: C<sub>19</sub>H<sub>25</sub>NO<sub>3</sub>**  
**MW: 315.41**

===== CHANNEL f1 =====  
 NUC1 1H  
 P1 10.00 usec  
 PL1 -2.78 dB  
 PL1W 27.10892296 W  
 SFO1 400.1724712 MHz  
 SI 32768  
 SF 400.1700091 MHz  
 WDW EM  
 SSB 0  
 LB 0.30 Hz  
 GB 0  
 PC 1.00

7.260  
 6.517  
 6.280  
 6.077  
 5.933  
 5.897  
 3.695  
 3.459  
 2.714  
 2.690  
 2.622  
 2.445  
 2.403  
 2.252  
 1.785

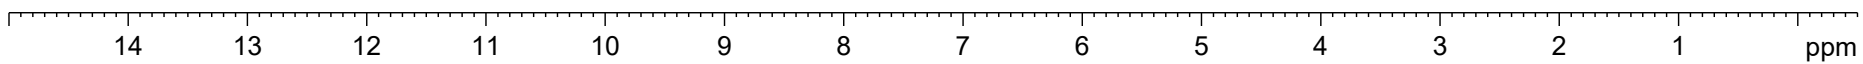

1.00  
 1.01  
 1.02  
 0.90  
 0.91  
 3.98  
 2.08  
 1.95  
 1.95  
 6.04  
 1.91  
 1.84



NAME JAL1067B\_13C  
 EXPNO 1  
 PROCNO 1  
 Date\_ 20160728  
 Time 10.52  
 INSTRUM spect  
 PROBHD 5 mm PABBO BB-  
 PULPROG zgpg30  
 TD 65536  
 SOLVENT CDCl3  
 NS 300  
 DS 4  
 SWH 29761.904 Hz  
 FIDRES 0.454131 Hz  
 AQ 1.1010548 sec  
 RG 203  
 DW 16.800 usec  
 DE 6.50 usec  
 TE 295.0 K  
 D1 2.00000000 sec  
 D11 0.03000000 sec  
 TD0 1

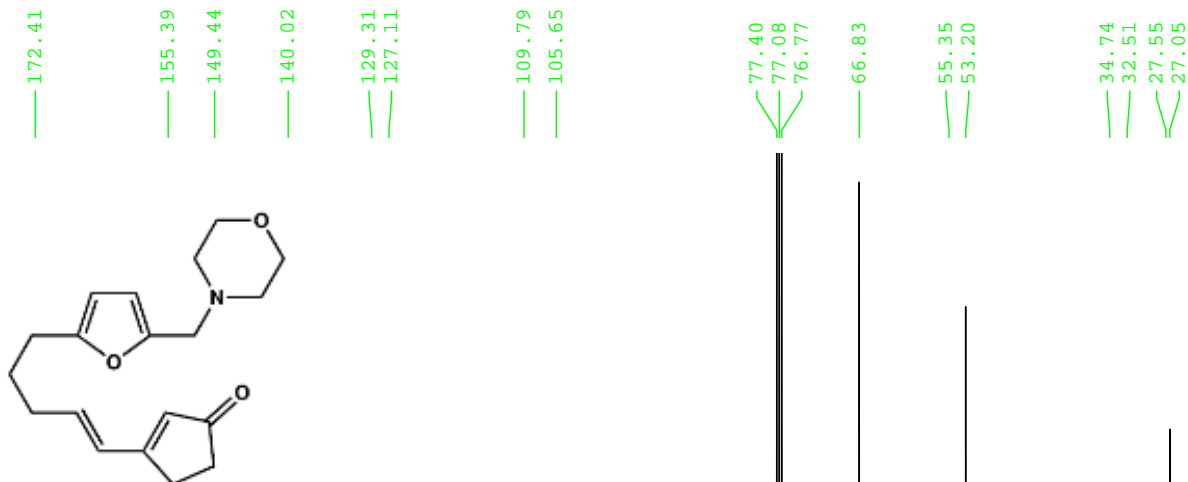

**12d: C<sub>19</sub>H<sub>25</sub>NO<sub>3</sub>**  
**MW: 315.41**

===== CHANNEL f1 =====  
 NUC1 13C  
 P1 10.00 usec  
 PL1 -1.78 dB  
 PL1W 47.30532455 W  
 SFO1 100.6328888 MHz

===== CHANNEL f2 =====  
 CPDPRG2 waltz16  
 NUC2 1H  
 PCPD2 80.00 usec  
 PL2 -2.78 dB  
 PL12 15.28 dB  
 PL13 18.00 dB  
 PL2W 27.10892296 W  
 PL12W 0.42375252 W  
 PL13W 0.22652298 W  
 SFO2 400.1716007 MHz  
 SI 32768  
 SF 100.6228270 MHz  
 WDW EM  
 SSB 0  
 LB 1.00 Hz  
 GB 0  
 PC 1.40

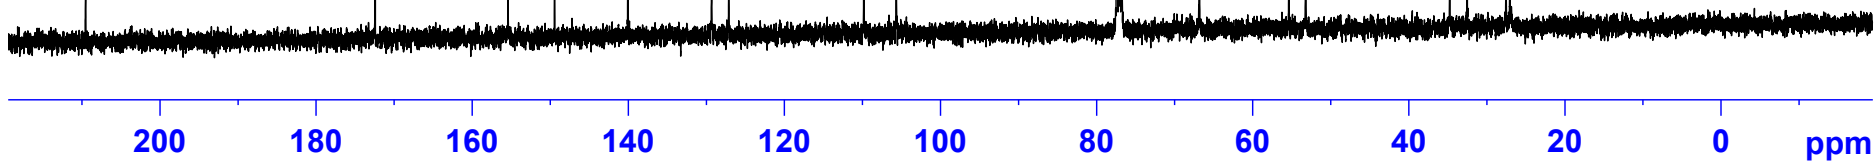

NAME JL2232b 1H  
 EXPNO 2  
 PROCNO 1  
 Date\_ 20170412  
 Time 14.05  
 INSTRUM spect  
 PROBHD 5 mm PABBO BB-  
 PULPROG zg30  
 TD 65536  
 SOLVENT CDCl3  
 NS 8  
 DS 2  
 SWH 8223.685 Hz  
 FIDRES 0.125483 Hz  
 AQ 3.9846387 sec  
 RG 203  
 DW 60.800 usec  
 DE 6.50 usec  
 TE 293.2 K  
 D1 1.0000000 sec  
 TD0 1

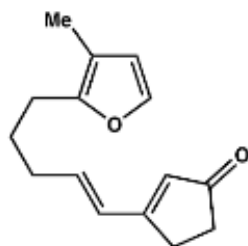

**12e:** C<sub>15</sub>H<sub>18</sub>O<sub>2</sub>  
 MW: 230.31

===== CHANNEL f1 =====  
 NUC1 1H  
 P1 10.00 usec  
 PL1 -2.78 dB  
 PL1W 27.10892296 W  
 SFO1 400.1724712 MHz  
 SI 32768  
 SF 400.1700088 MHz  
 WDW EM  
 SSB 0  
 LB 0.30 Hz  
 GB 0  
 PC 1.00

7.260  
 7.223  
 6.533  
 6.284  
 6.159  
 5.954

2.716  
 2.601  
 2.455  
 2.430  
 2.240  
 1.947  
 1.797

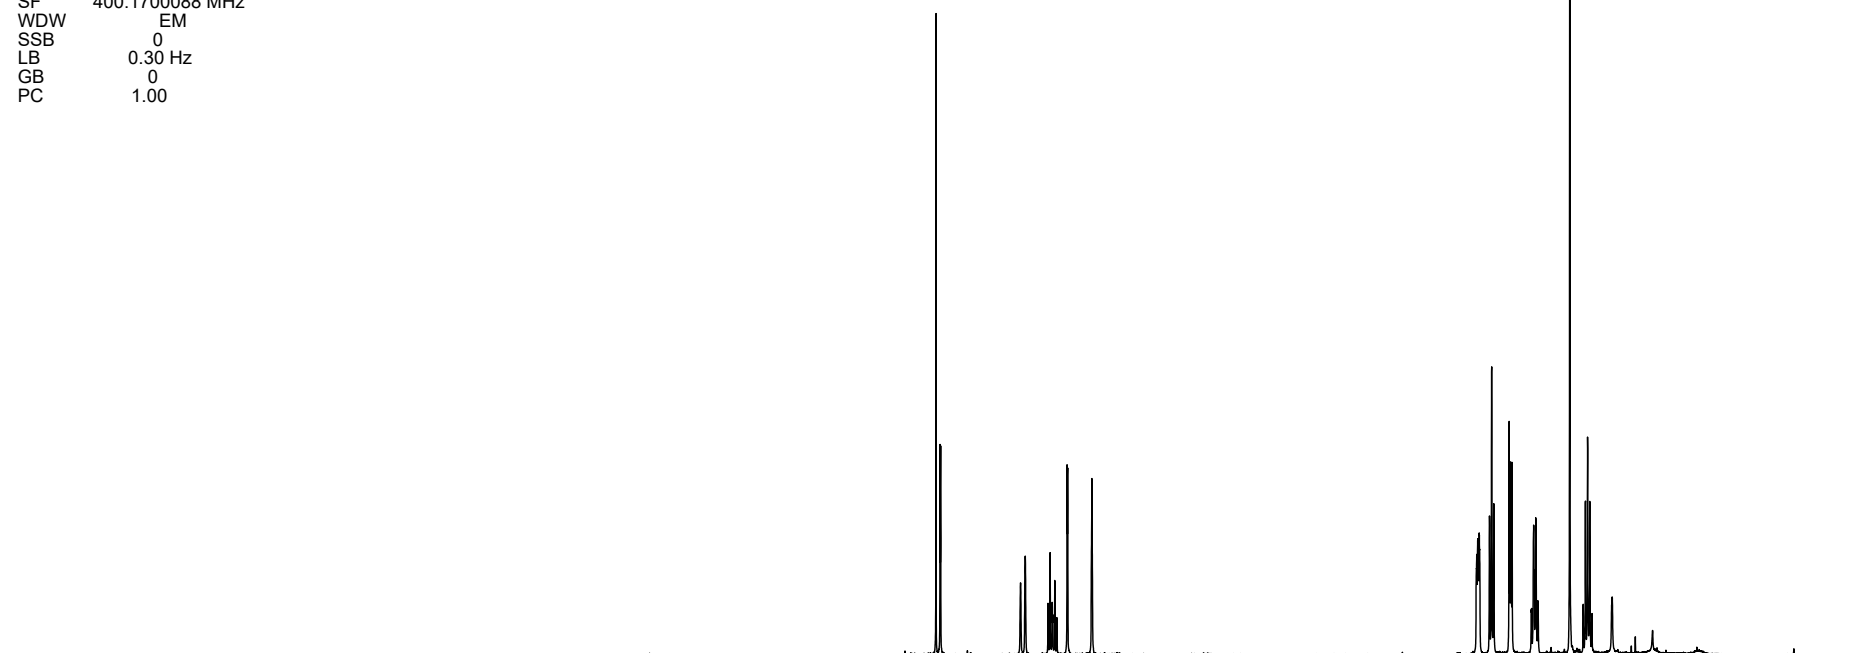

14 13 12 11 10 9 8 7 6 5 4 3 2 1 ppm

1.00  
 1.08  
 1.08  
 1.01  
 1.04

2.13  
 2.16  
 2.16  
 2.15  
 3.10  
 2.18

NAME JL2232b 13C  
EXPNO 1  
PROCNO 1  
Date\_ 20170203  
Time 22.20  
INSTRUM spect  
PROBHD 5 mm PABBO BB-  
PULPROG zgpg30  
TD 65536  
SOLVENT CDCl3  
NS 256  
DS 4  
SWH 36057.691 Hz  
FIDRES 0.550197 Hz  
AQ 0.9088159 sec  
RG 203  
DW 13.867 usec  
DE 6.50 usec  
TE 296.0 K  
D1 2.00000000 sec  
D11 0.03000000 sec  
TD0 1

===== CHANNEL f1 =====  
NUC1 13C  
P1 9.50 usec  
PL1 3.00 dB  
PL1W 59.92485046 W  
SFO1 150.9178988 MHz

===== CHANNEL f2 =====  
CPDPRG2 waltz16  
NUC2 1H  
PCPD2 80.00 usec  
PL2 -1.40 dB  
PL12 13.74 dB  
PL13 13.70 dB  
PL2W 16.22728539 W  
PL12W 0.49687356 W  
PL13W 0.50147104 W  
SFO2 600.1324005 MHz  
SI 32768  
SF 150.9028090 MHz  
WDW EM  
SSB 0  
LB 1.00 Hz  
GB 0  
PC 1.40

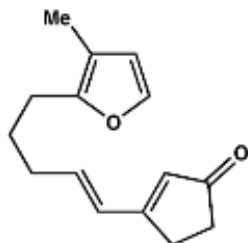

**12e:** C<sub>15</sub>H<sub>18</sub>O<sub>2</sub>  
MW: 230.31

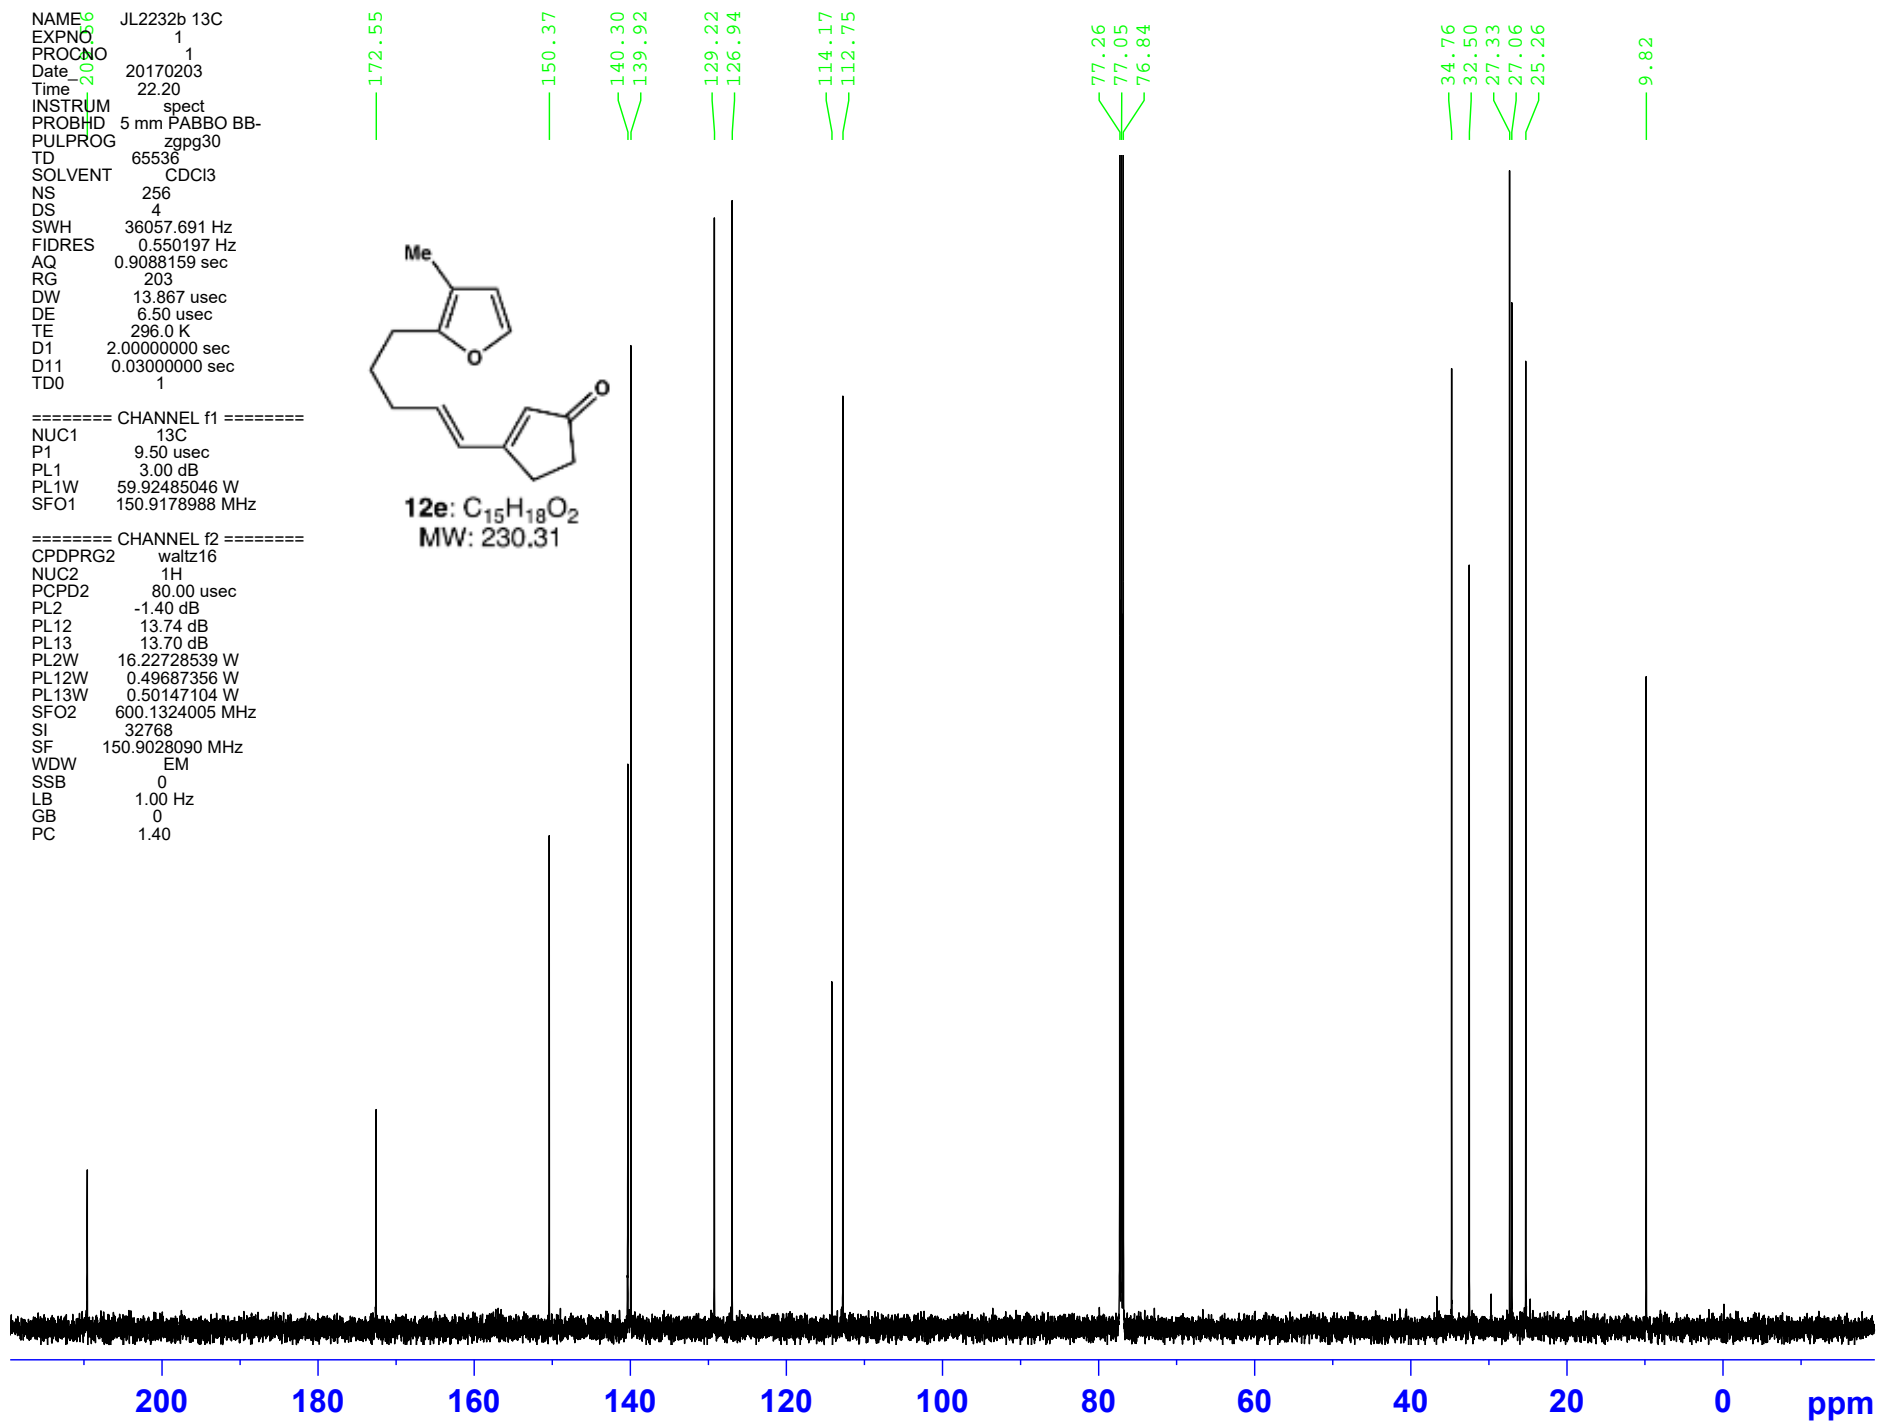

NAME JAL2121Db 1H  
 EXPNO 1  
 PROCNO 1  
 Date\_ 20170509  
 Time 9.02  
 INSTRUM spect  
 PROBHD 5 mm PABBO BB-  
 PULPROG zg30  
 TD 65536  
 SOLVENT CDCl3  
 NS 8  
 DS 2  
 SWH 8223.685 Hz  
 FIDRES 0.125483 Hz  
 AQ 3.9846387 sec  
 RG 203  
 DW 60.800 usec  
 DE 6.50 usec  
 TE 293.8 K  
 D1 1.00000000 sec  
 TD0 1

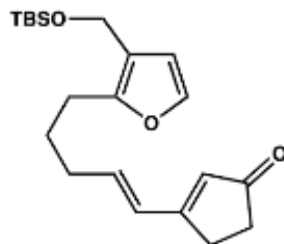

**12f:** C<sub>21</sub>H<sub>32</sub>O<sub>3</sub>Si  
 MW: 360.57

===== CHANNEL f1 =====  
 NUC1 1H  
 P1 10.00 usec  
 PL1 -2.78 dB  
 PL1W 27.10892296 W  
 SFO1 400.1724712 MHz  
 SI 32768  
 SF 400.1700091 MHz  
 WDW EM  
 SSB 0  
 LB 0.30 Hz  
 GB 0  
 PC 1.00

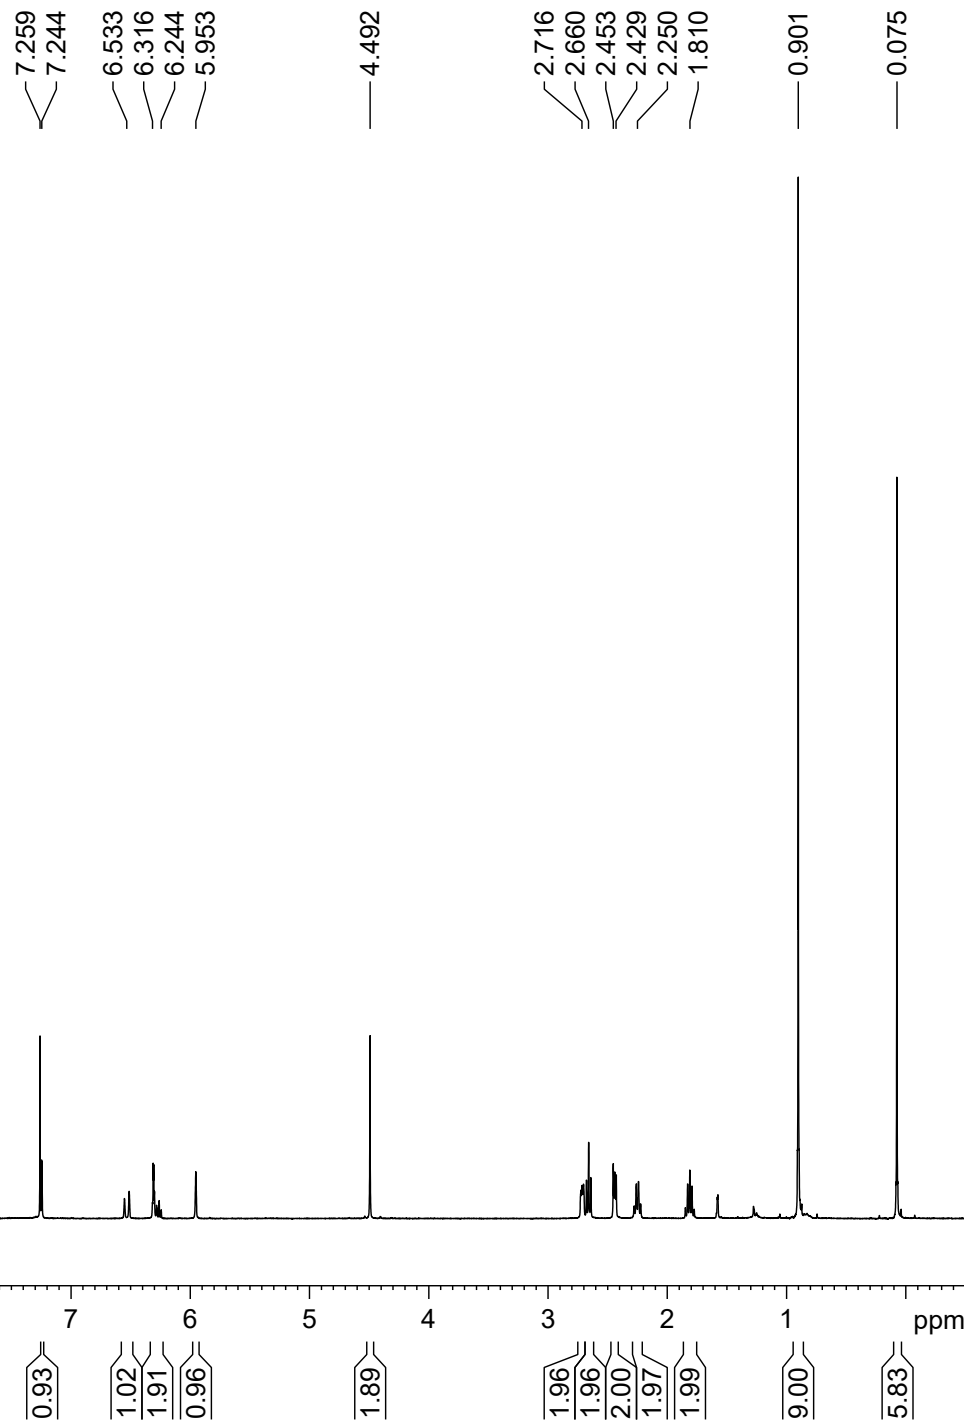

14 13 12 11 10 9 8 7 6 5 4 3 2 1 ppm

NAME JAL2121Db 13C  
 EXPNO 1  
 PROCNO 1  
 Date\_ 20170510  
 Time 1.07  
 INSTRUM spect  
 PROBHD 5 mm PABBO BB-  
 PULPROG zgpg30  
 TD 65536  
 SOLVENT CDCl3  
 NS 25  
 DS 4  
 SWH 24038.461 Hz  
 FIDRES 0.366798 Hz  
 AQ 1.3631988 sec  
 RG 203  
 DW 20.800 usec  
 DE 6.50 usec  
 TE 295.1 K  
 D1 2.00000000 sec  
 D11 0.03000000 sec  
 TD0 1

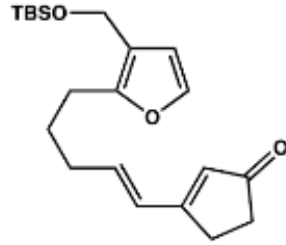

12f: C<sub>21</sub>H<sub>32</sub>O<sub>3</sub>Si  
 MW: 360.57

===== CHANNEL f1 =====  
 NUC1 13C  
 P1 10.00 usec  
 PL1 -1.78 dB  
 PL1W 47.30532455 W  
 SFO1 100.6328888 MHz

===== CHANNEL f2 =====  
 CPDPRG2 waltz16  
 NUC2 1H  
 PCPD2 80.00 usec  
 PL2 -2.78 dB  
 PL12 15.28 dB  
 PL13 18.00 dB  
 PL2W 27.10892296 W  
 PL12W 0.42375252 W  
 PL13W 0.22652298 W  
 SFO2 400.1716007 MHz  
 SI 32768  
 SF 100.6228270 MHz  
 WDW EM  
 SSB 0  
 LB 1.00 Hz  
 GB 0  
 PC 1.40

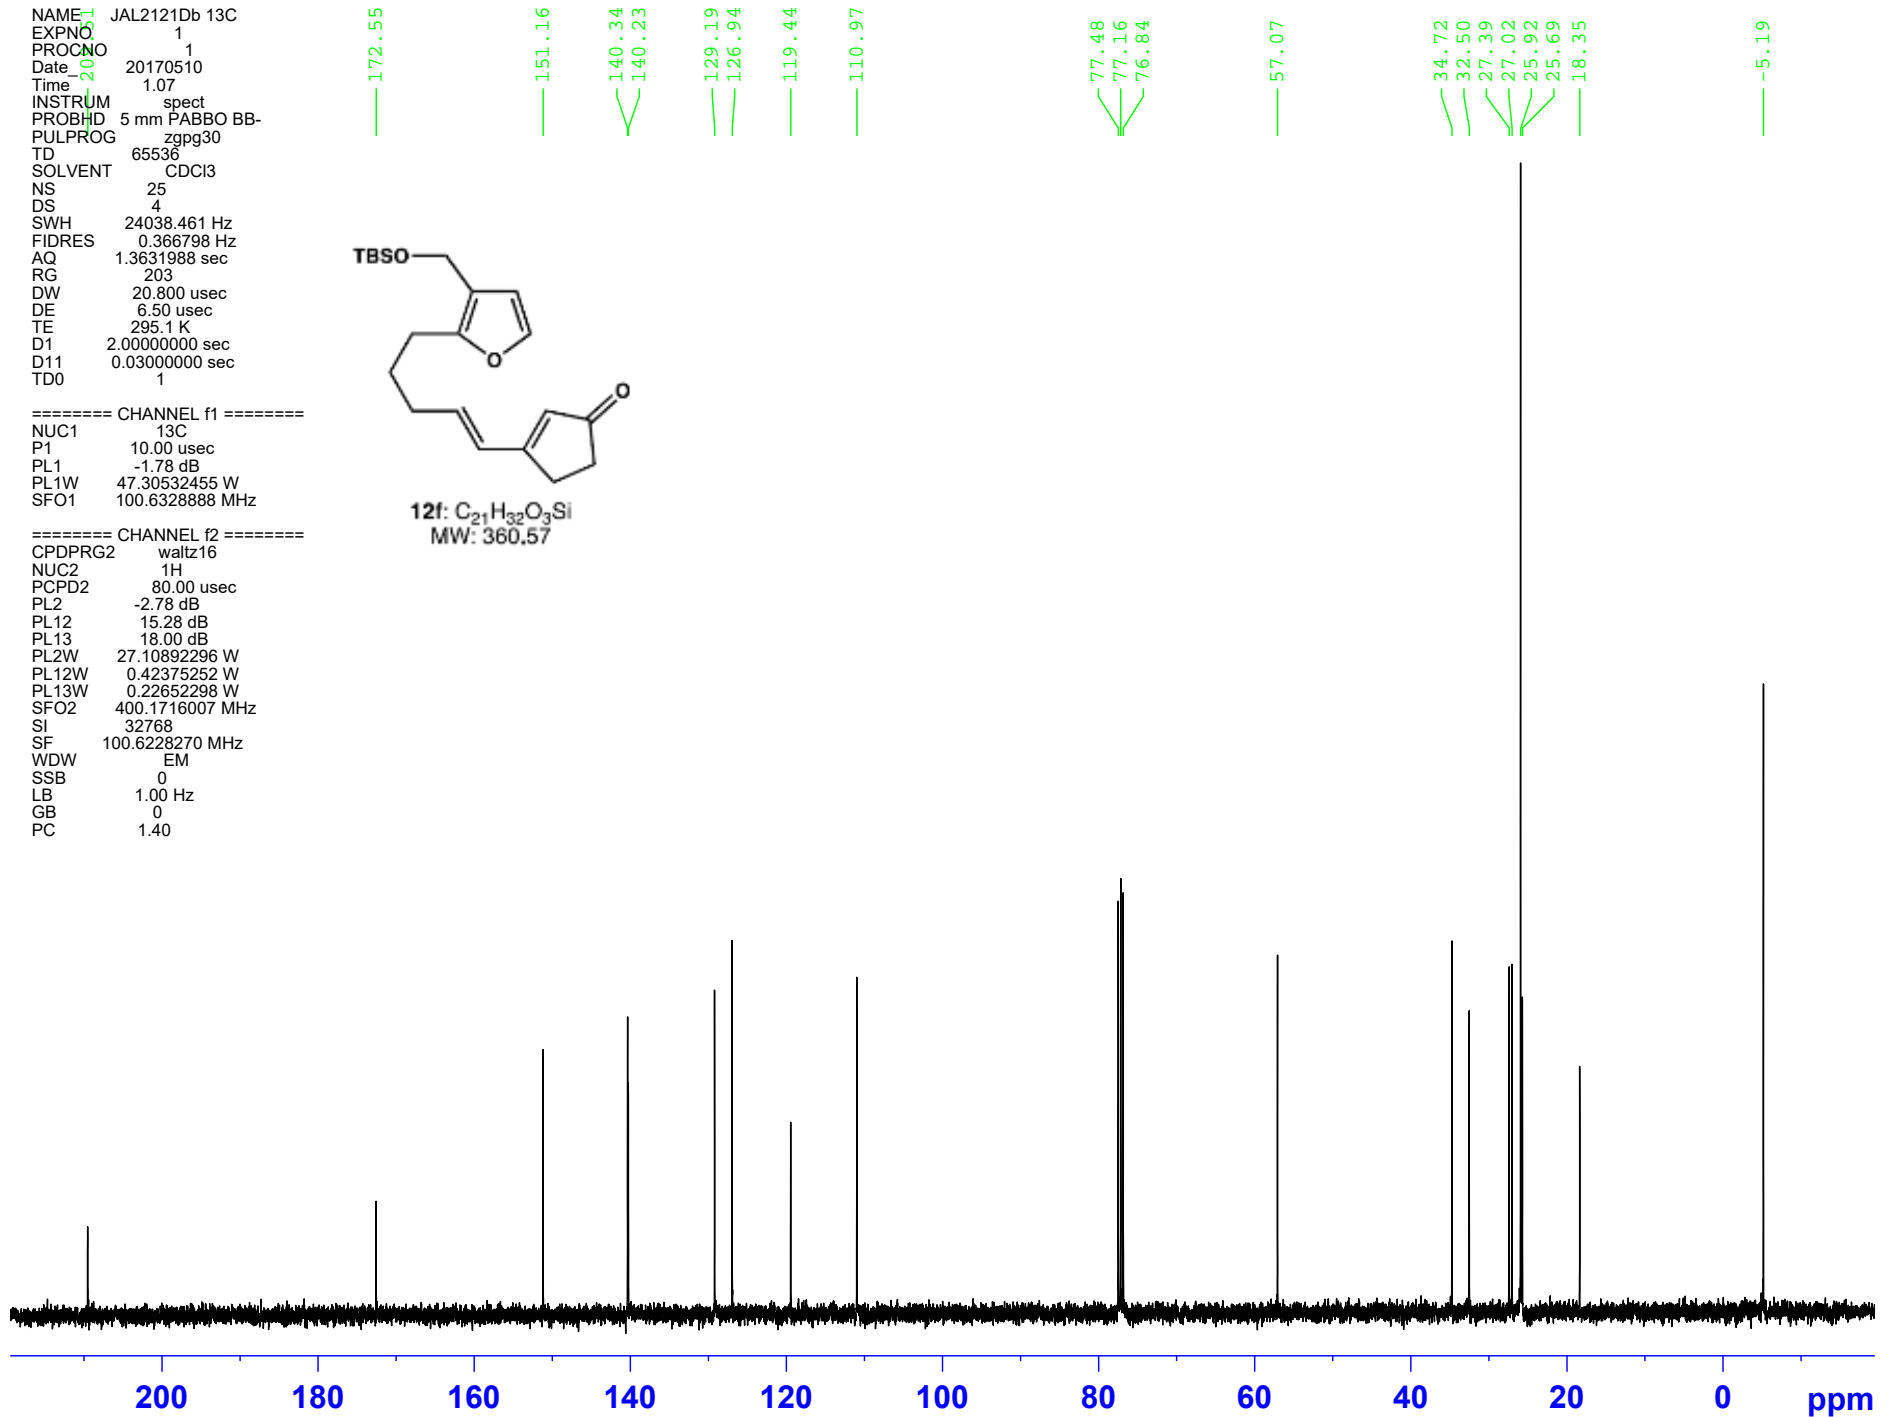

NAME AES 4060 column 3  
 EXPNO 1  
 PROCNO 1  
 Date\_ 20170517  
 Time 17.46  
 INSTRUM spect  
 PROBHD 5 mm PABBO BB-  
 PULPROG zg30  
 TD 65536  
 SOLVENT CDCl3  
 NS 10  
 DS 2  
 SWH 8223.685 Hz  
 FIDRES 0.125483 Hz  
 AQ 3.9846387 sec  
 RG 203  
 DW 60.800 usec  
 DE 6.50 usec  
 TE 294.1 K  
 D1 1.00000000 sec  
 TD0 1

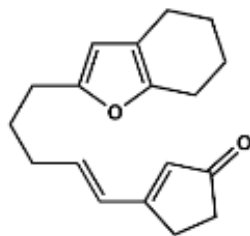

**12g**: C<sub>18</sub>H<sub>22</sub>O<sub>2</sub>  
 MW: 270.37

===== CHANNEL f1 =====  
 NUC1 1H  
 P1 10.00 usec  
 PL1 -2.78 dB  
 PL1W 27.10892296 W  
 SFO1 400.1724712 MHz  
 SI 32768  
 SF 400.1700091 MHz  
 WDW EM  
 SSB 0  
 LB 0.30 Hz  
 GB 0  
 PC 1.00

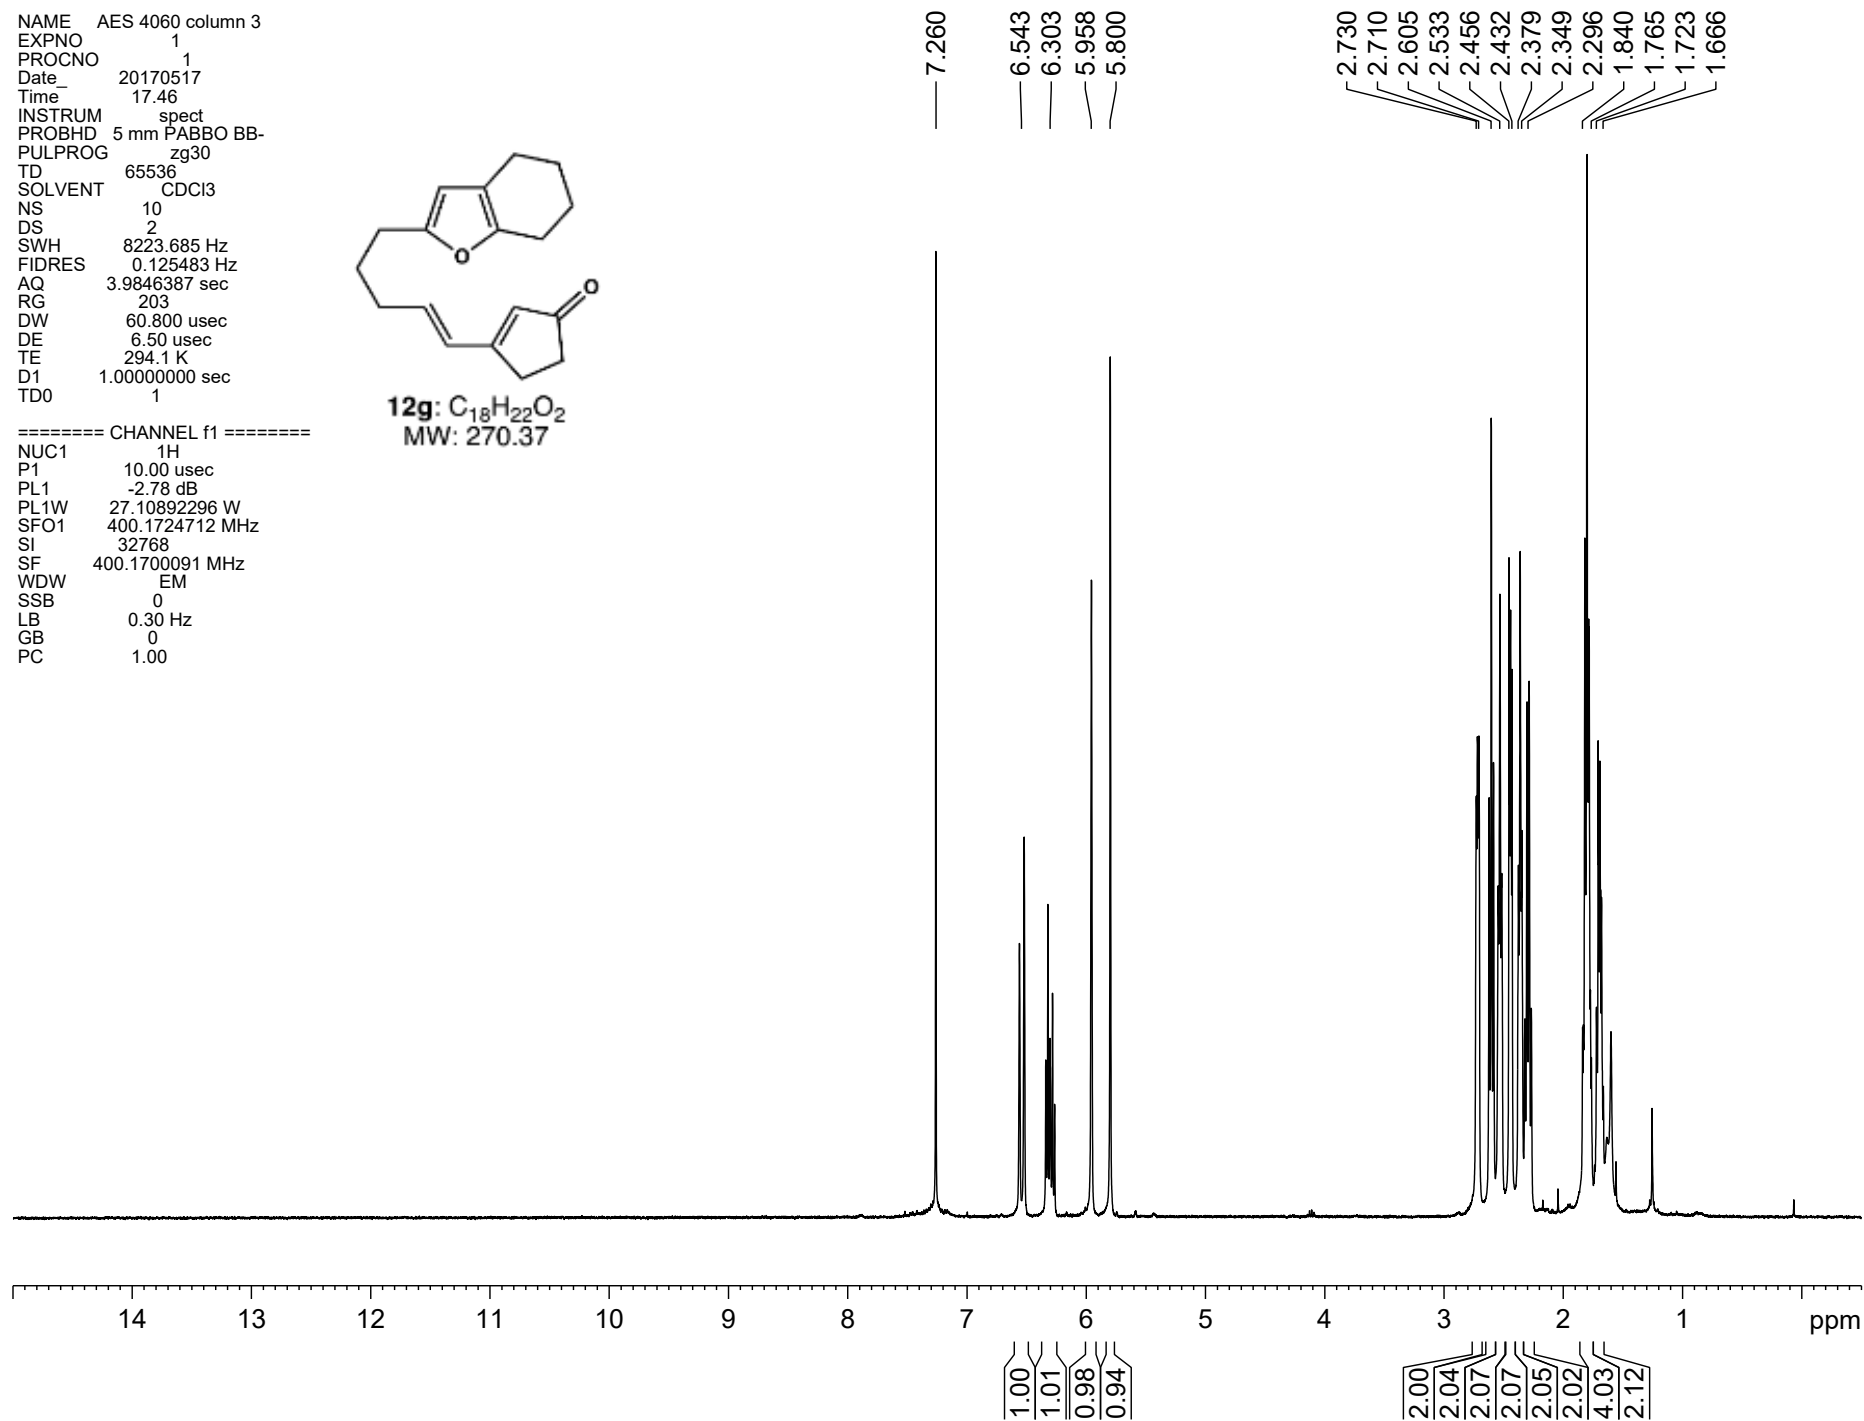

NAME AES 4060 C13  
 EXPNO 1  
 PROCNO 1  
 Date\_ 20170517  
 Time 19.57  
 INSTRUM spect  
 PROBHD 5 mm PABBO BB-  
 PULPROG zgpg30  
 TD 65536  
 SOLVENT CDCl3  
 NS 256  
 DS 4  
 SWH 24038.461 Hz  
 FIDRES 0.366798 Hz  
 AQ 1.3631988 sec  
 RG 203  
 DW 20.800 usec  
 DE 6.50 usec  
 TE 295.0 K  
 D1 2.00000000 sec  
 D11 0.03000000 sec  
 TD0 1

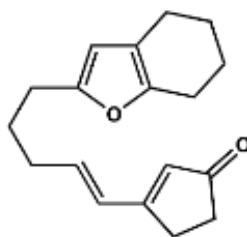

**12g: C<sub>18</sub>H<sub>22</sub>O<sub>2</sub>**  
**MW: 270.37**

===== CHANNEL f1 =====  
 NUC1 13C  
 P1 10.00 usec  
 PL1 -1.78 dB  
 PL1W 47.30532455 W  
 SFO1 100.6328888 MHz

===== CHANNEL f2 =====  
 CPDPRG2 waltz16  
 NUC2 1H  
 PCPD2 80.00 usec  
 PL2 -2.78 dB  
 PL12 15.28 dB  
 PL13 18.00 dB  
 PL2W 27.10892296 W  
 PL12W 0.42375252 W  
 PL13W 0.22652298 W  
 SFO2 400.1716007 MHz  
 SI 32768  
 SF 100.6228270 MHz  
 WDW EM  
 SSB 0  
 LB 1.00 Hz  
 GB 0  
 PC 1.40

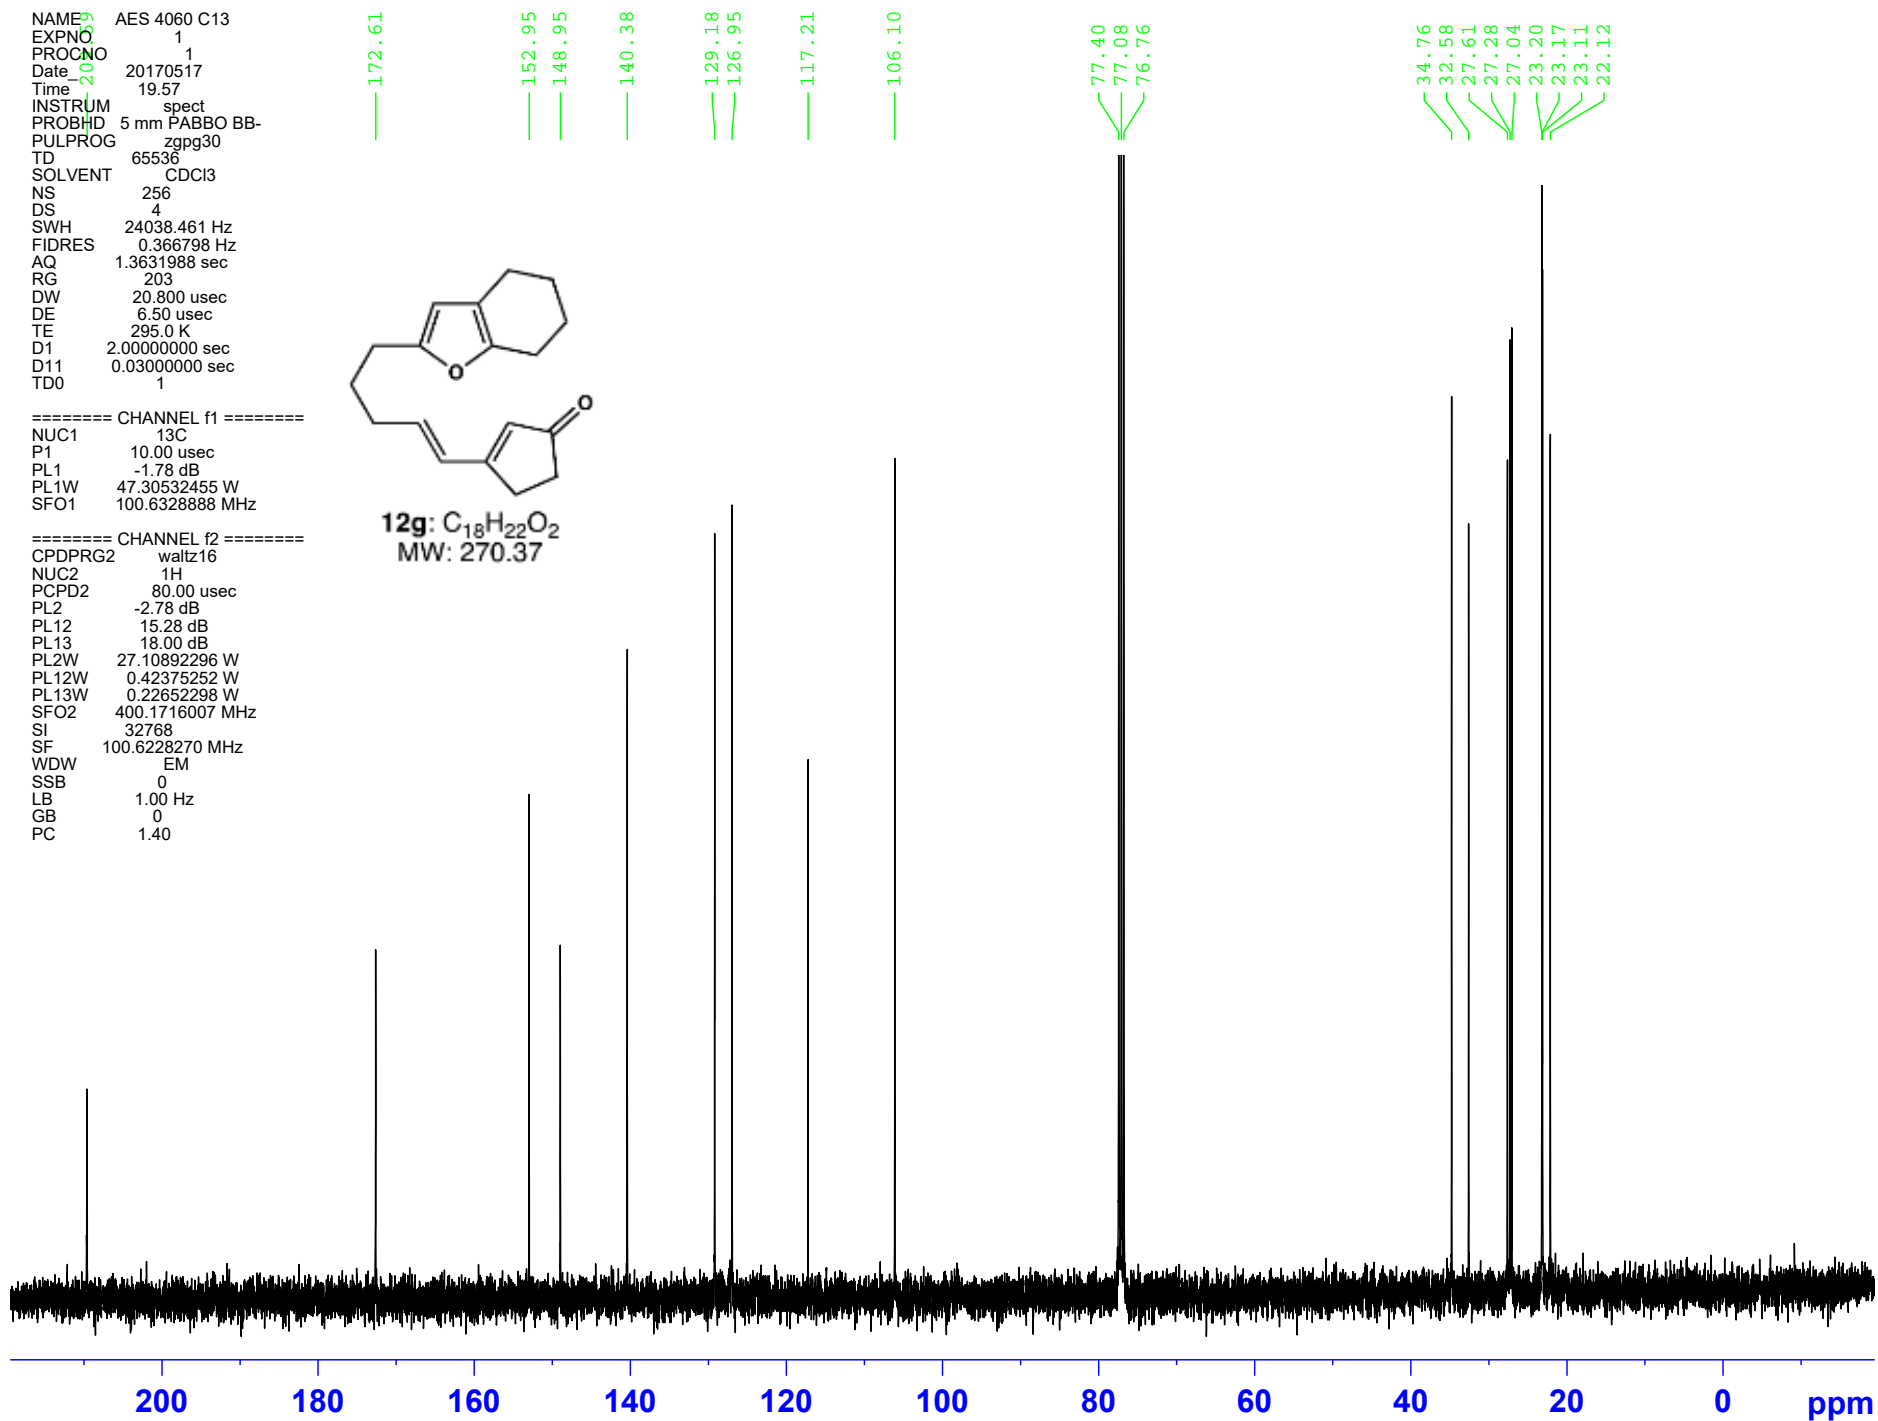



NAME JAL2290dii 1H  
EXPNO 1  
PROCNO 1  
Date\_ 20170810  
Time 22.16  
INSTRUM spect  
PROBHD 5 mm PABBO BB-  
PULPROG zg30  
TD 65536  
SOLVENT CDCl3  
NS 8  
DS 2  
SWH 8223.685 Hz  
FIDRES 0.125483 Hz  
AQ 3.9846387 sec  
RG 181  
DW 60.800 usec  
DE 6.50 usec  
TE 295.8 K  
D1 1.00000000 sec  
TD0 1

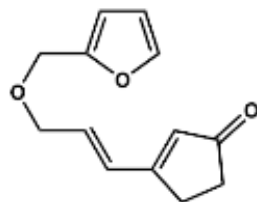

**12h:** C<sub>13</sub>H<sub>14</sub>O<sub>3</sub>  
MW: 218.25

===== CHANNEL f1 =====  
NUC1 1H  
P1 10.00 usec  
PL1 -2.78 dB  
PL1W 27.10892296 W  
SFO1 400.1724712 MHz  
SI 32768  
SF 400.1700108 MHz  
WDW EM  
SSB 0  
LB 0.30 Hz  
GB 0  
PC 1.00

7.420  
7.256  
6.753  
6.349  
6.285  
6.030  
4.506  
4.187  
2.742  
2.720  
2.464  
2.439

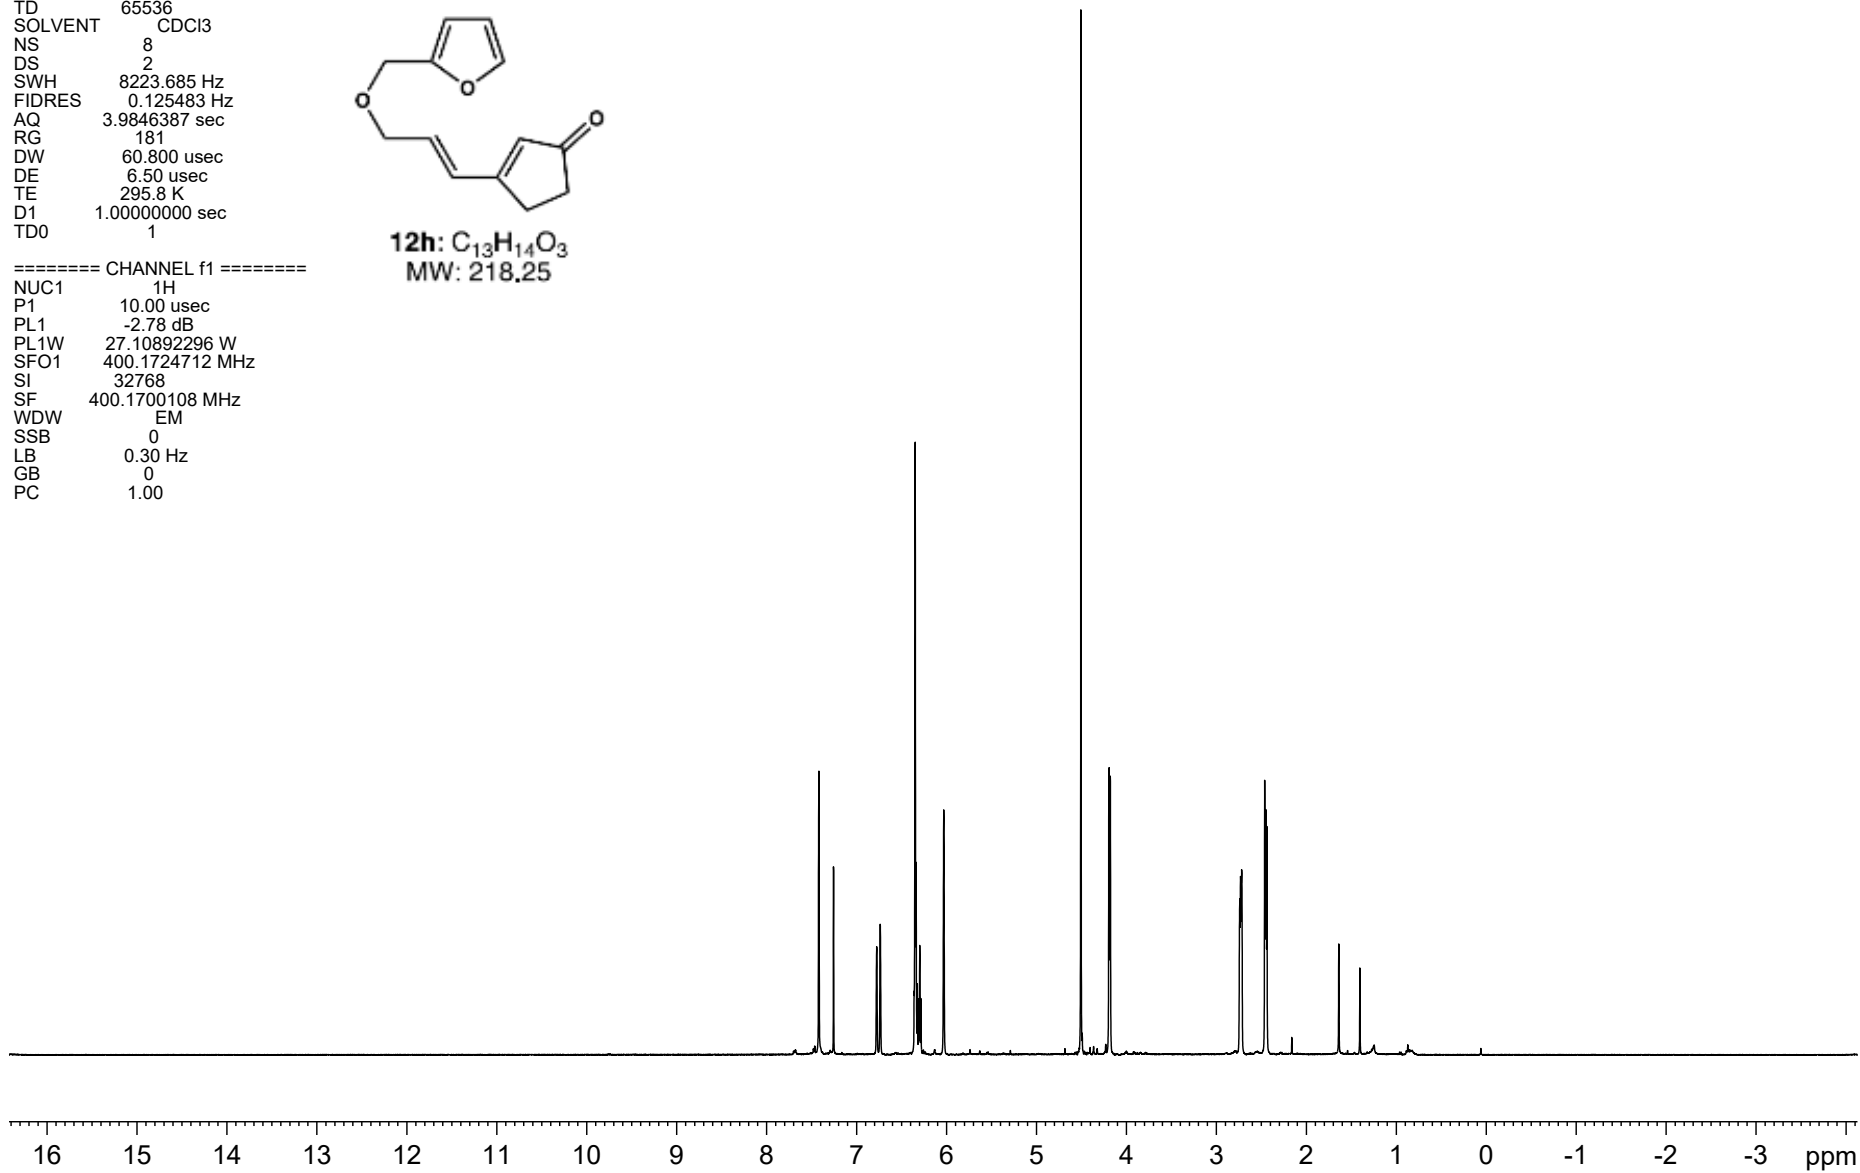

1.00  
0.35  
1.00  
3.01  
0.97  
2.06  
2.06  
2.03  
2.06

NAME JAL2290dii 13C  
 EXPNO 2  
 PROCNO 1  
 Date\_ 20170810  
 Time 22.31  
 INSTRUM spect  
 PROBHD 5 mm PABBO BB-  
 PULPROG zgpg30  
 TD 65536  
 SOLVENT CDCl3  
 NS 20  
 DS 4  
 SWH 24038.461 Hz  
 FIDRES 0.366798 Hz  
 AQ 1.3631988 sec  
 RG 203  
 DW 20.800 usec  
 DE 6.50 usec  
 TE 296.3 K  
 D1 2.00000000 sec  
 D11 0.03000000 sec  
 TD0 1

===== CHANNEL f1 =====  
 NUC1 13C  
 P1 10.00 usec  
 PL1 -1.78 dB  
 PL1W 47.30532455 W  
 SFO1 100.6328888 MHz

===== CHANNEL f2 =====  
 CPDPRG2 waltz16  
 NUC2 1H  
 PCPD2 80.00 usec  
 PL2 -2.78 dB  
 PL12 15.28 dB  
 PL13 18.00 dB  
 PL2W 27.10892296 W  
 PL12W 0.42375252 W  
 PL13W 0.22652298 W  
 SFO2 400.1716007 MHz  
 SI 32768  
 SF 100.6228270 MHz  
 WDW EM  
 SSB 0  
 LB 1.00 Hz  
 GB 0  
 PC 1.40

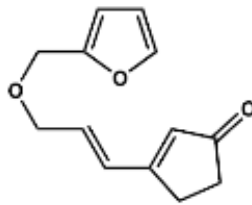

**12h: C<sub>13</sub>H<sub>14</sub>O<sub>3</sub>**  
**MW: 218.25**

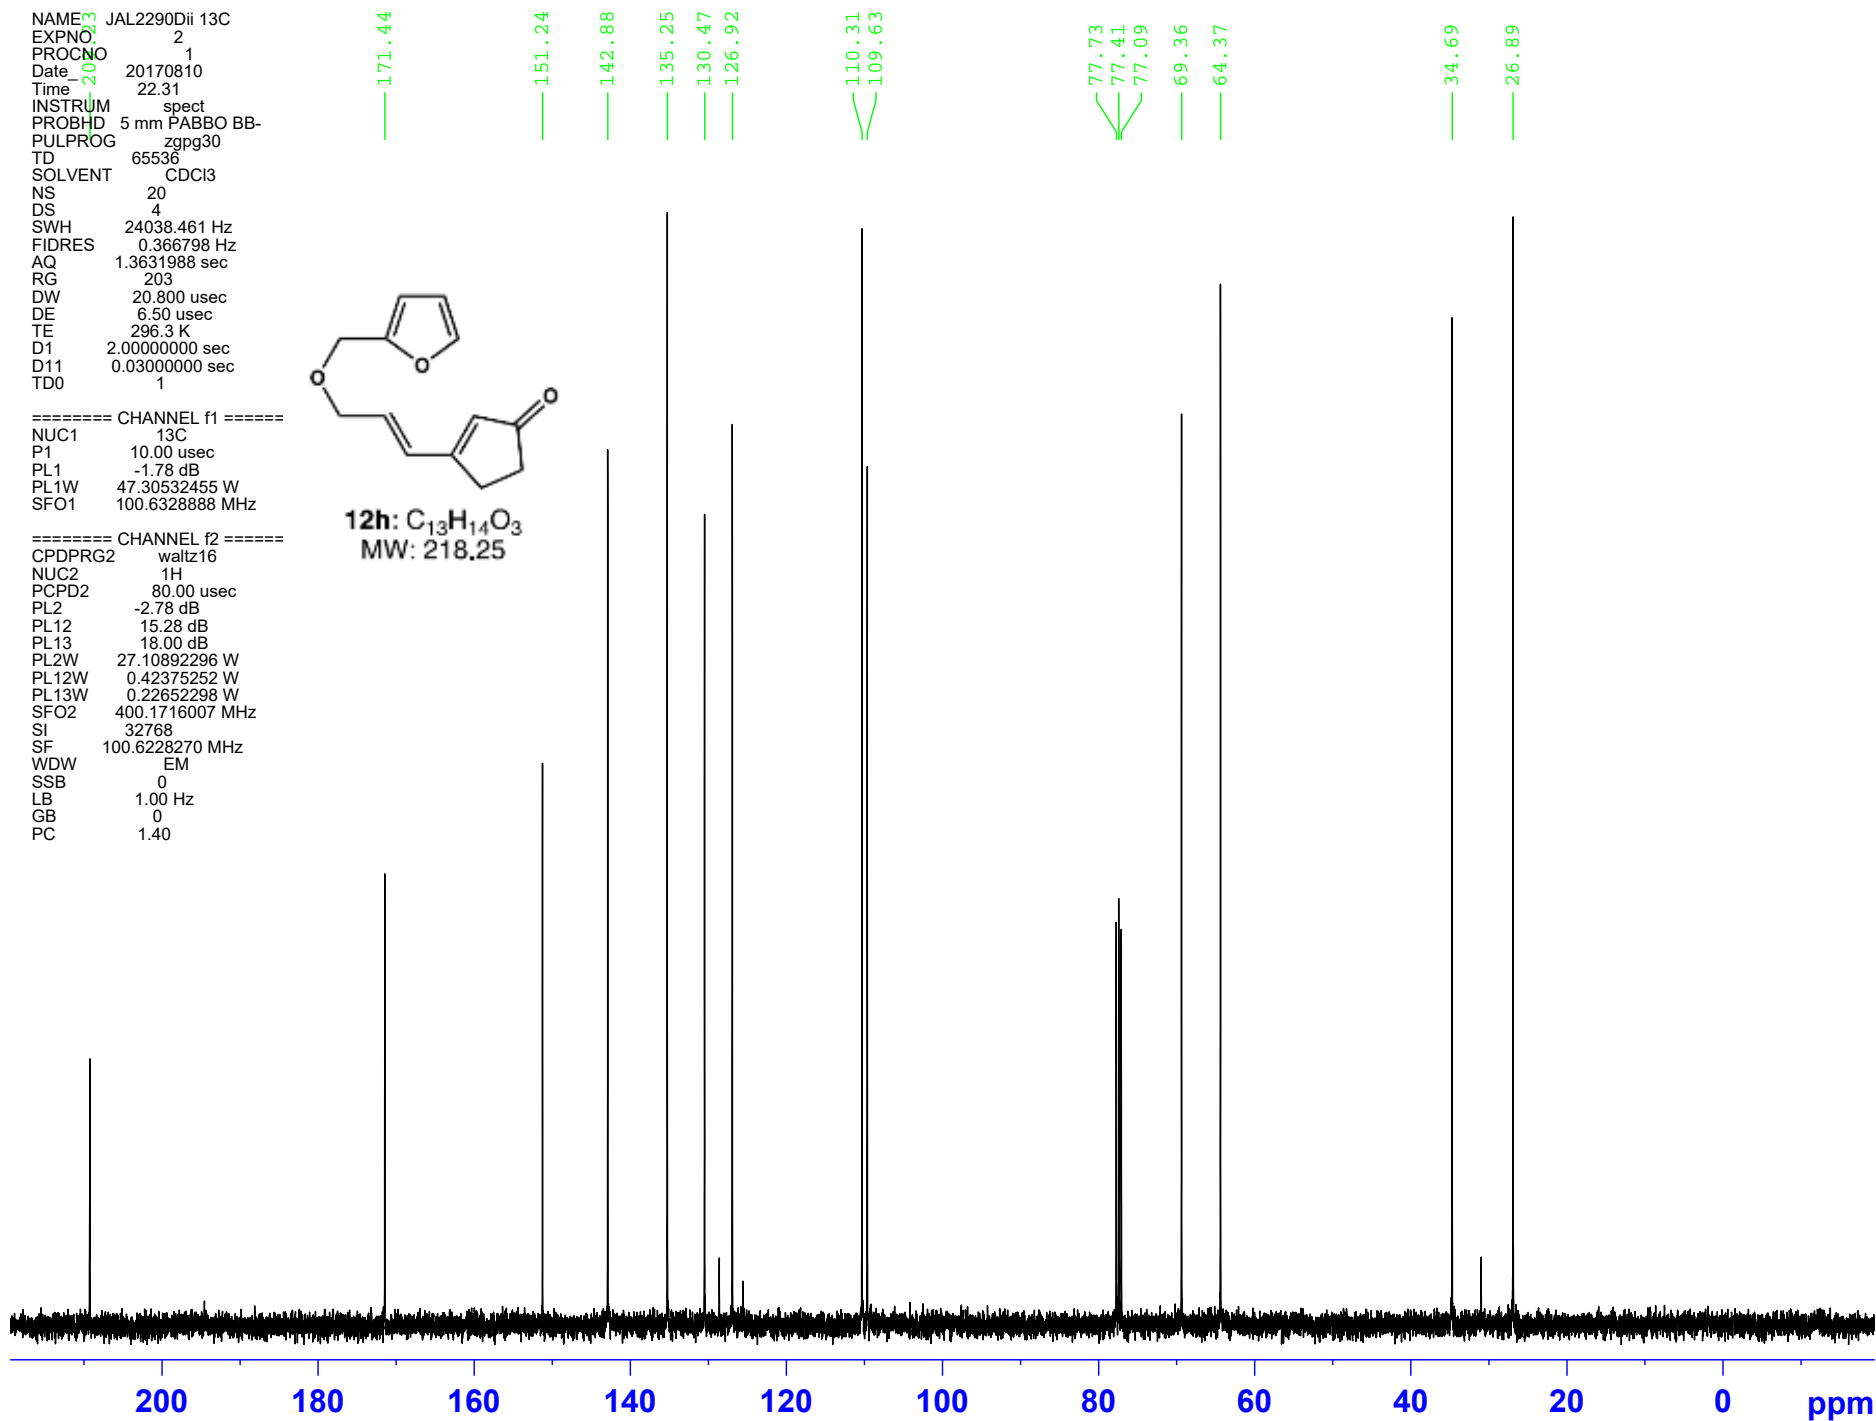

NAME JAL3217C 1H  
EXPNO 1  
PROCNO 1  
Date\_ 20171214  
Time 14.05  
INSTRUM spect  
PROBHD 5 mm PABBO BB-  
PULPROG zg30  
TD 65536  
SOLVENT CDCl3  
NS 8  
DS 2  
SWH 8223.685 Hz  
FIDRES 0.125483 Hz  
AQ 3.9846387 sec  
RG 203  
DW 60.800 usec  
DE 6.50 usec  
TE 294.8 K  
D1 1.00000000 sec  
TD0 1

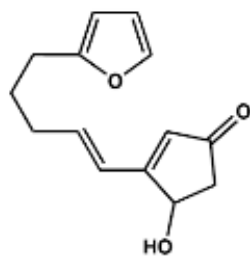

12j: C<sub>14</sub>H<sub>16</sub>O<sub>3</sub>  
MW: 232.28

===== CHANNEL f1 =====  
NUC1 1H  
P1 10.00 usec  
PL1 -2.78 dB  
PL1W 27.10892296 W  
SFO1 400.1724712 MHz  
SI 32768  
SF 400.1700085 MHz  
WDW EM  
SSB 0  
LB 0.30 Hz  
GB 0  
PC 1.00

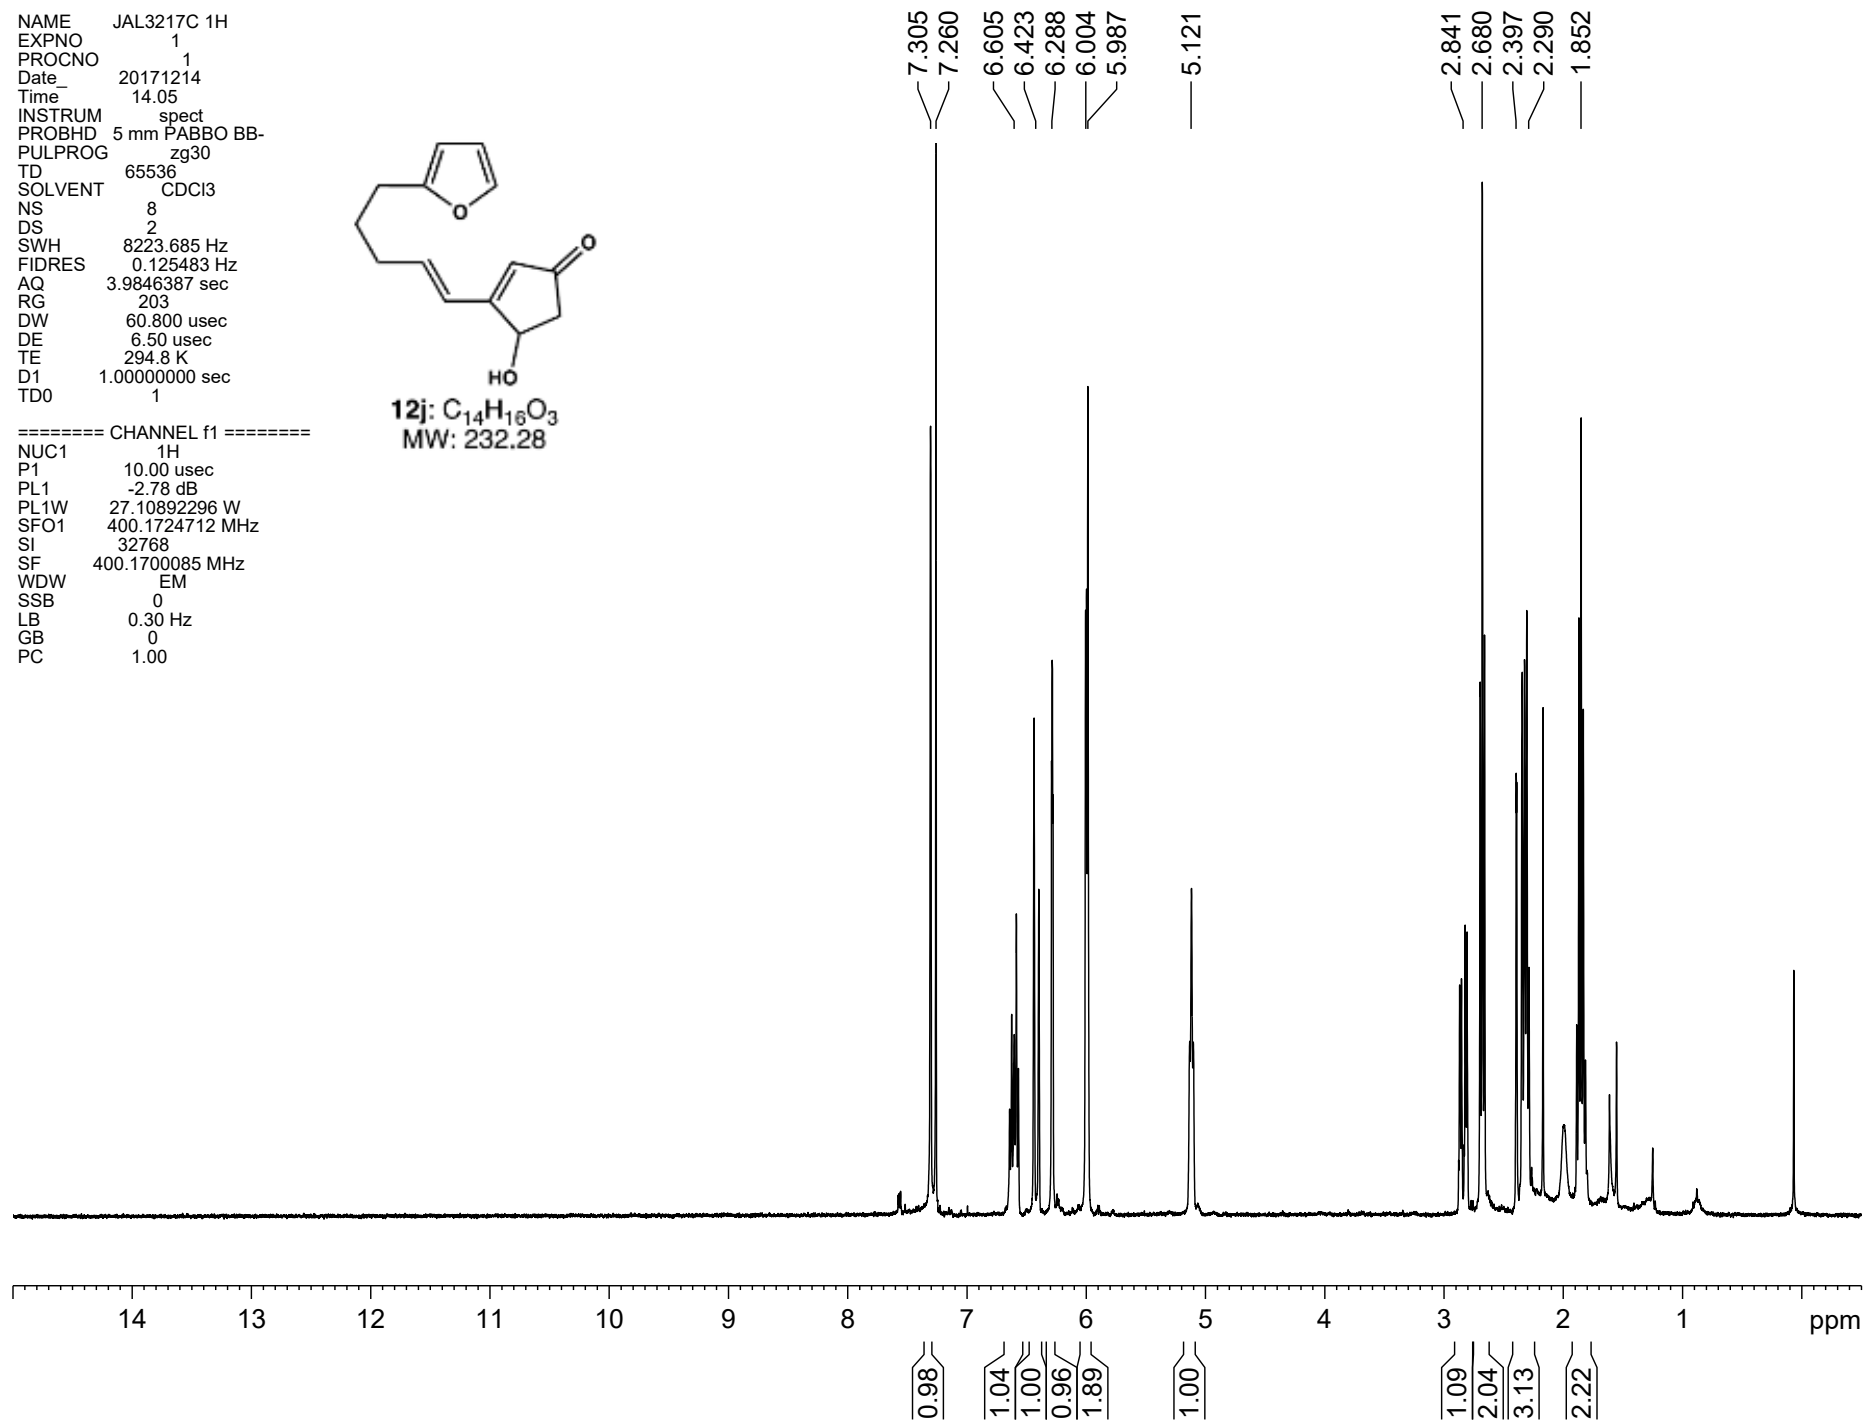

NAME JAL2126A 13C  
 EXPNO 1  
 PROCNO 1  
 Date\_ 20170511  
 Time 0.15  
 INSTRUM spect  
 PROBHD 5 mm PABBO BB-  
 PULPROG zgpg30  
 TD 65536  
 SOLVENT CDCl3  
 NS 385  
 DS 4  
 SWH 24038.461 Hz  
 FIDRES 0.366798 Hz  
 AQ 1.3631988 sec  
 RG 203  
 DW 20.800 usec  
 DE 6.50 usec  
 TE 295.1 K  
 D1 2.00000000 sec  
 D11 0.03000000 sec  
 TD0 1

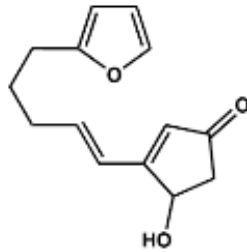

**12j: C<sub>14</sub>H<sub>16</sub>O<sub>3</sub>**  
**MW: 232.28**

===== CHANNEL f1 =====  
 NUC1 13C  
 P1 10.00 usec  
 PL1 -1.78 dB  
 PL1W 47.30532455 W  
 SFO1 100.6328888 MHz

===== CHANNEL f2 =====  
 CPDPRG2 waltz16  
 NUC2 1H  
 PCPD2 80.00 usec  
 PL2 -2.78 dB  
 PL12 15.28 dB  
 PL13 18.00 dB  
 PL2W 27.10892296 W  
 PL12W 0.42375252 W  
 PL13W 0.22652298 W  
 SFO2 400.1716007 MHz  
 SI 32768  
 SF 100.6228270 MHz  
 WDW EM  
 SSB 0  
 LB 1.00 Hz  
 GB 0  
 PC 1.40

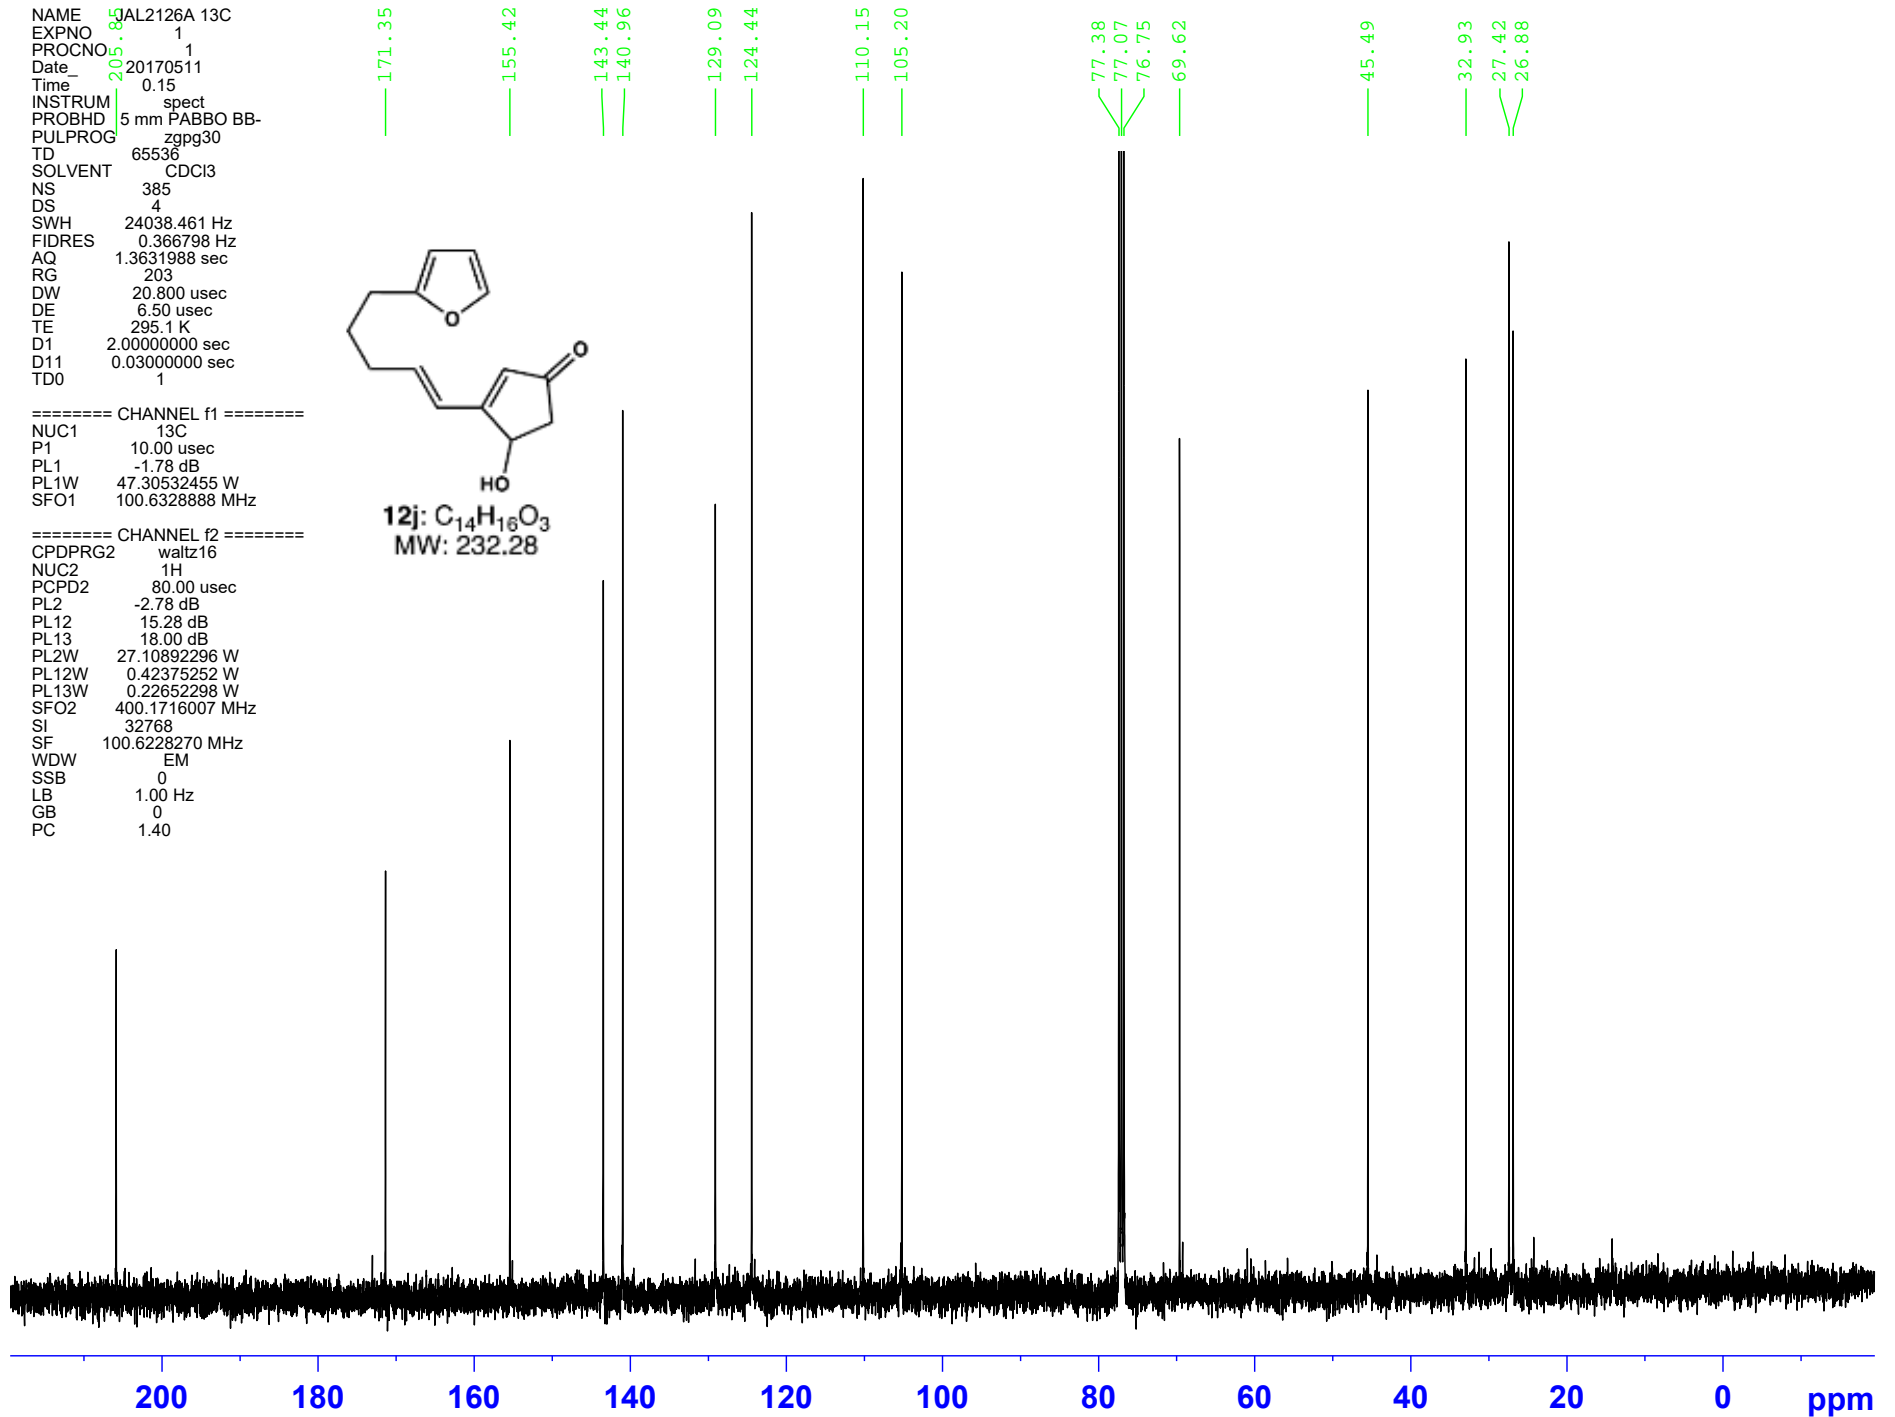

NAME JAL3146C 1H  
EXPNO 2  
PROCNO 1  
Date\_ 20171027  
Time 9.52  
INSTRUM spect  
PROBHD 5 mm PABBO BB-  
PULPROG zg30  
TD 65536  
SOLVENT CDCl3  
NS 8  
DS 2  
SWH 8223.685 Hz  
FIDRES 0.125483 Hz  
AQ 3.9846387 sec  
RG 203  
DW 60.800 usec  
DE 6.50 usec  
TE 294.2 K  
D1 1.00000000 sec  
TD0 1

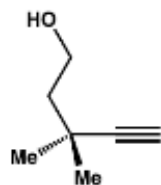

S10: C<sub>7</sub>H<sub>12</sub>O  
MW: 112.17

===== CHANNEL f1 =====  
NUC1 1H  
P1 10.00 usec  
PL1 -2.78 dB  
PL1W 27.10892296 W  
SFO1 400.1724712 MHz  
SI 32768  
SF 400.1700088 MHz  
WDW EM  
SSB 0  
LB 0.30 Hz  
GB 0  
PC 1.00

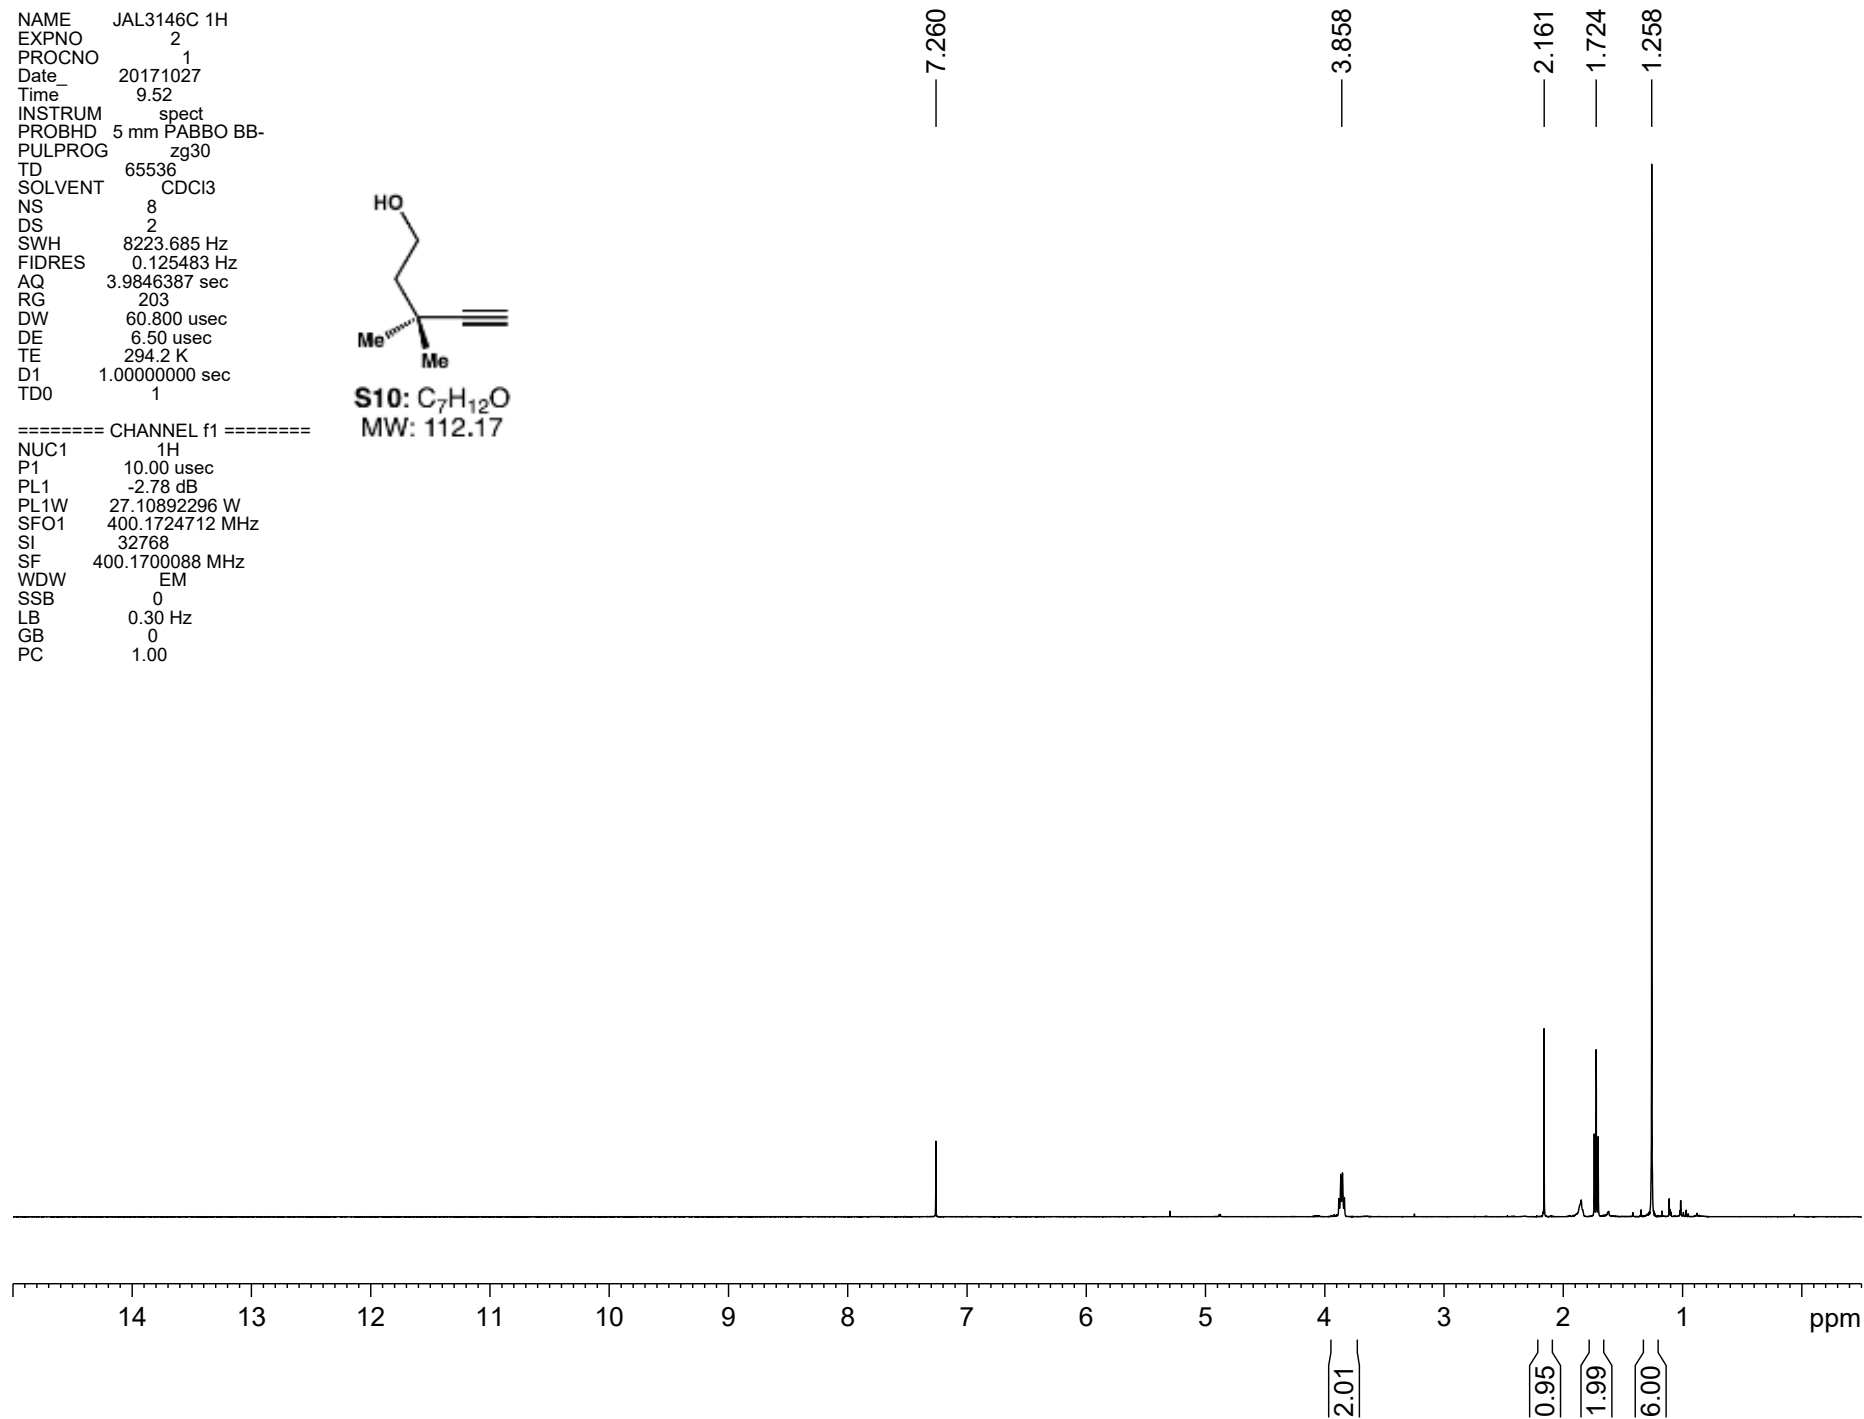

NAME JAL3056A 1H  
EXPNO 1  
PROCNO 1  
Date\_ 20170916  
Time 14.34  
INSTRUM spect  
PROBHD 5 mm PABBO BB-  
PULPROG zg30  
TD 65536  
SOLVENT CDCl3  
NS 8  
DS 2  
SWH 8223.685 Hz  
FIDRES 0.125483 Hz  
AQ 3.9846387 sec  
RG 101  
DW 60.800 usec  
DE 6.50 usec  
TE 293.5 K  
D1 1.00000000 sec  
TD0 1

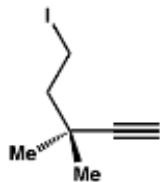

S11: C<sub>7</sub>H<sub>11</sub>I  
MW: 222.07

===== CHANNEL f1 =====  
NUC1 1H  
P1 10.00 usec  
PL1 -2.78 dB  
PL1W 27.10892296 W  
SFO1 400.1724712 MHz  
SI 32768  
SF 400.1700091 MHz  
WDW EM  
SSB 0  
LB 0.30 Hz  
GB 0  
PC 1.00

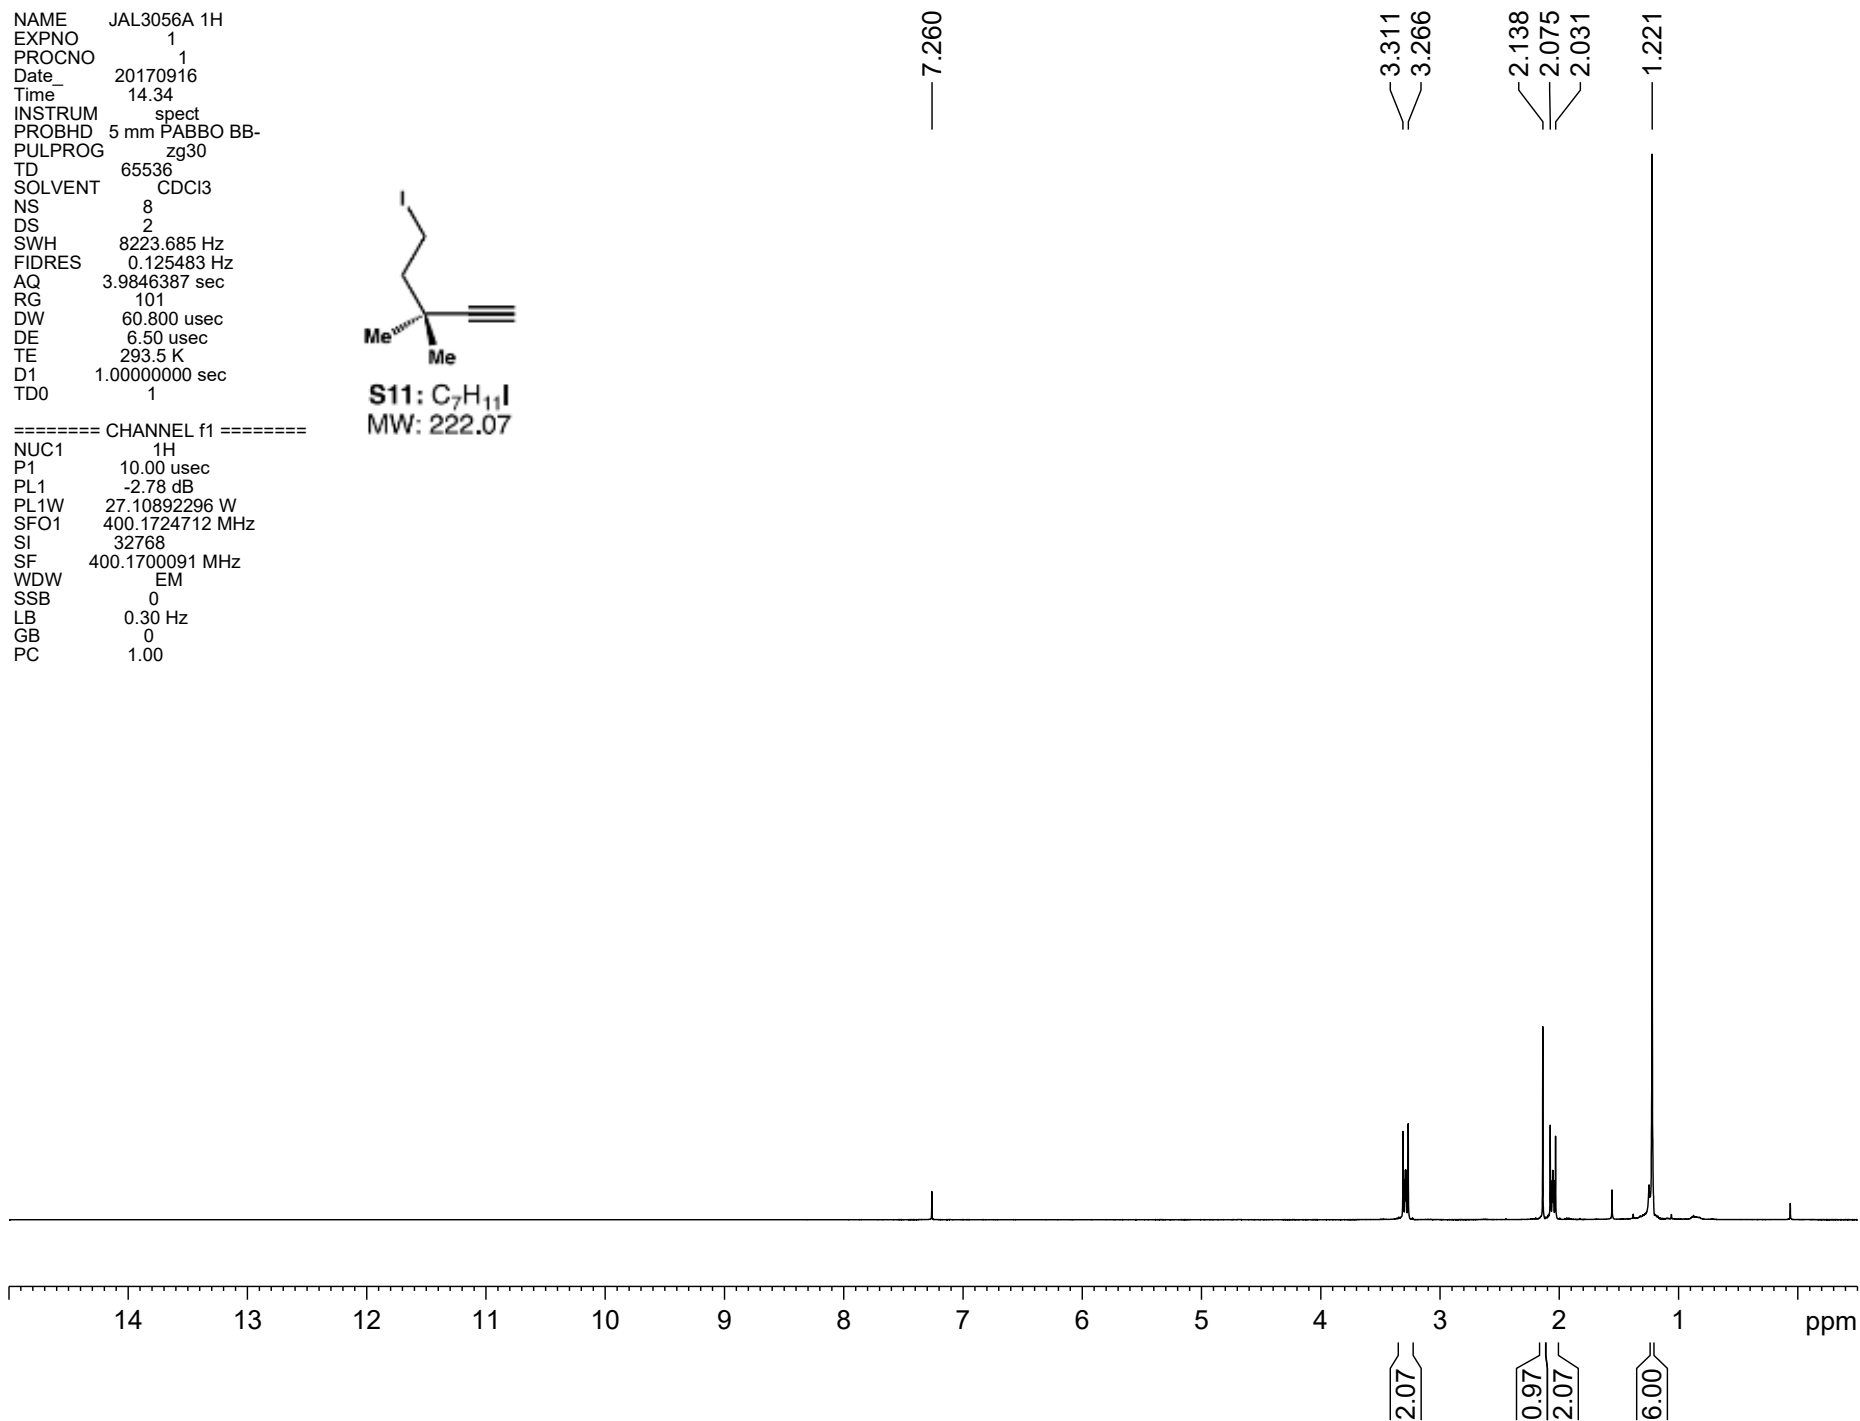

NAME JAL3056A 13C  
EXPNO 1  
PROCNO 1  
Date\_ 20170916  
Time\_ 14.49  
INSTRUM spect  
PROBHD 5 mm PABBO BB-  
PULPROG zgpg30  
TD 65536  
SOLVENT CDCl3  
NS 150  
DS 4  
SWH 24038.461 Hz  
FIDRES 0.366798 Hz  
AQ 1.3631988 sec  
RG 203  
DW 20.800 usec  
DE 6.50 usec  
TE 294.4 K  
D1 2.00000000 sec  
D11 0.03000000 sec  
TD0 1

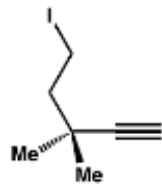

**S11: C<sub>7</sub>H<sub>11</sub>I**  
MW: 222.07

===== CHANNEL f1 =====  
NUC1 13C  
P1 10.00 usec  
PL1 -1.78 dB  
PL1W 47.30532455 W  
SFO1 100.6328888 MHz

===== CHANNEL f2 =====  
CPDPRG2 waltz16  
NUC2 1H  
PCPD2 80.00 usec  
PL2 -2.78 dB  
PL12 15.28 dB  
PL13 18.00 dB  
PL2W 27.10892296 W  
PL12W 0.42375252 W  
PL13W 0.22652298 W  
SFO2 400.1716007 MHz  
SI 32768  
SF 100.6228270 MHz  
WDW EM  
SSB 0  
LB 1.00 Hz  
GB 0  
PC 1.40

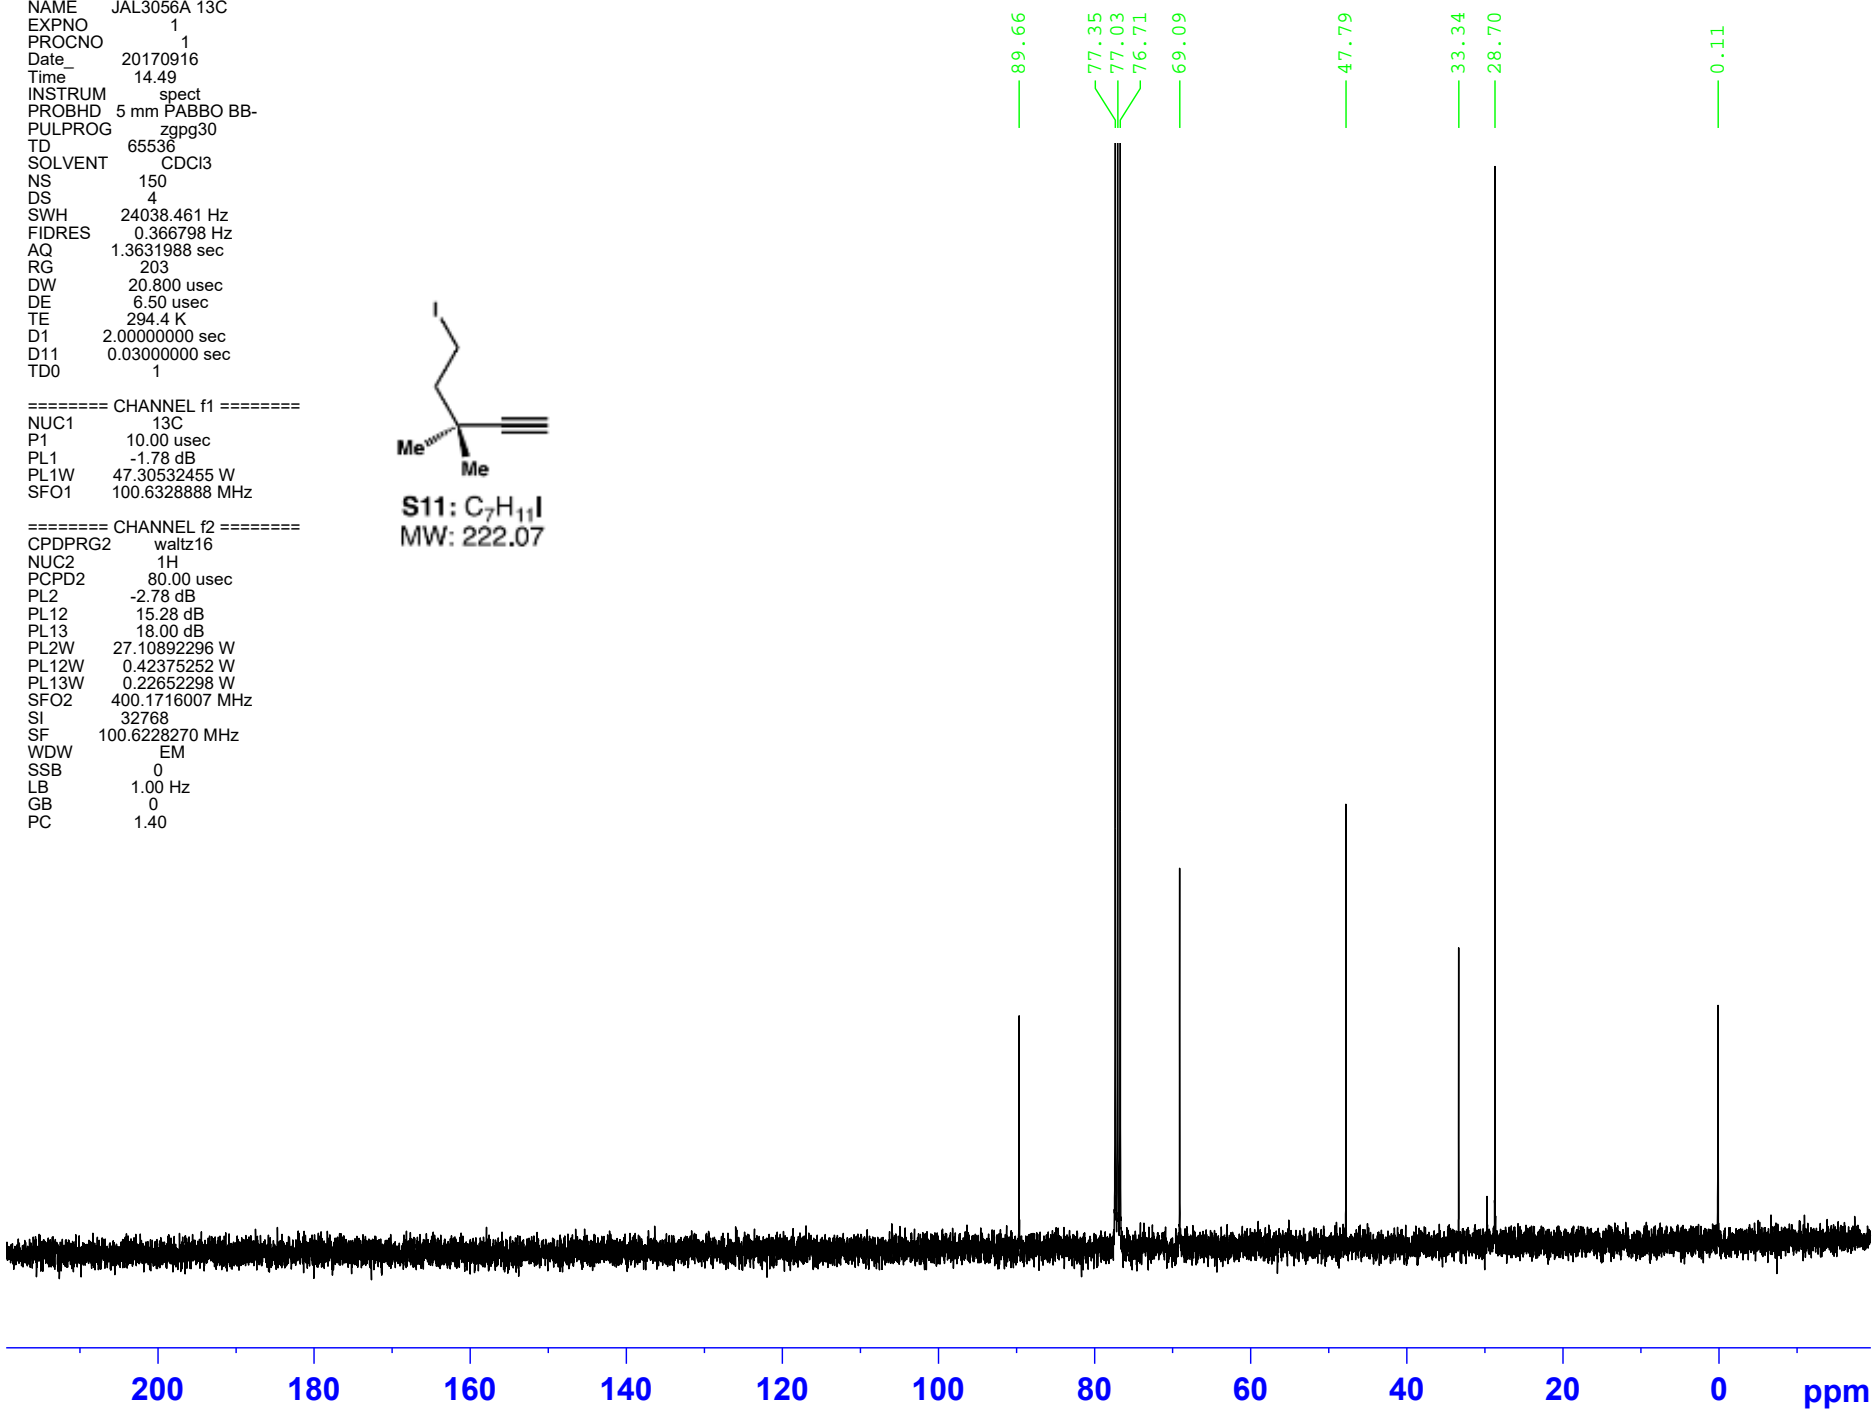

NAME JAL3144AB 1H  
EXPNO 2  
PROCNO 1  
Date\_ 20171027  
Time 9.39  
INSTRUM spect  
PROBHD 5 mm PABBO BB-  
PULPROG zg30  
TD 65536  
SOLVENT CDCl3  
NS 8  
DS 2  
SWH 8223.685 Hz  
FIDRES 0.125483 Hz  
AQ 3.9846387 sec  
RG 144  
DW 60.800 usec  
DE 6.50 usec  
TE 294.5 K  
D1 1.00000000 sec  
TD0 1

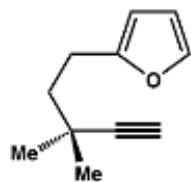

S12: C<sub>11</sub>H<sub>14</sub>O  
MW: 162.23

===== CHANNEL f1 =====  
NUC1 1H  
P1 10.00 usec  
PL1 -2.78 dB  
PL1W 27.10892296 W  
SFO1 400.1724712 MHz  
SI 32768  
SF 400.1700088 MHz  
WDW EM  
SSB 0  
LB 0.30 Hz  
GB 0  
PC 1.00

7.302  
7.260

6.281  
6.000  
5.990

2.829  
2.787

2.131  
1.782  
1.740

1.261

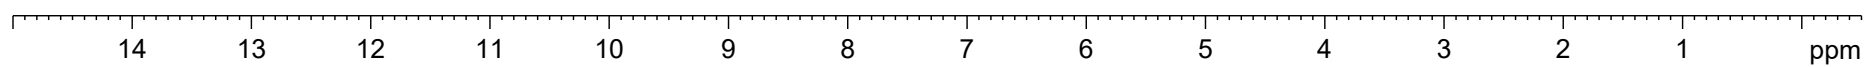

0.92

0.95

0.94

1.95

0.93

1.97

6.00



NAME JAL3144AB 13C  
 EXPNO 3  
 PROCNO 1  
 Date\_ 20171027  
 Time\_ 18.13  
 INSTRUM spect  
 PROBHD 5 mm PABBO BB-  
 PULPROG zgpg30  
 TD 65536  
 SOLVENT CDCl3  
 NS 10  
 DS 4  
 SWH 24038.461 Hz  
 FIDRES 0.366798 Hz  
 AQ 1.3631988 sec  
 RG 203  
 DW 20.800 usec  
 DE 6.50 usec  
 TE 294.0 K  
 D1 2.00000000 sec  
 D11 0.03000000 sec  
 TD0 1

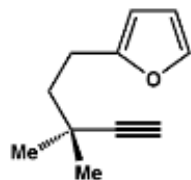

**S12: C<sub>11</sub>H<sub>14</sub>O**  
 MW: 162.23

===== CHANNEL f1 =====  
 NUC1 13C  
 P1 10.00 usec  
 PL1 -1.78 dB  
 PL1W 47.30532455 W  
 SFO1 100.6328888 MHz

===== CHANNEL f2 =====  
 CPDPRG2 waltz16  
 NUC2 1H  
 PCPD2 80.00 usec  
 PL2 -2.78 dB  
 PL12 15.28 dB  
 PL13 18.00 dB  
 PL2W 27.10892296 W  
 PL12W 0.42375252 W  
 PL13W 0.22652298 W  
 SFO2 400.1716007 MHz  
 SI 32768  
 SF 100.6228270 MHz  
 WDW EM  
 SSB 0  
 LB 1.00 Hz  
 GB 0  
 PC 1.40

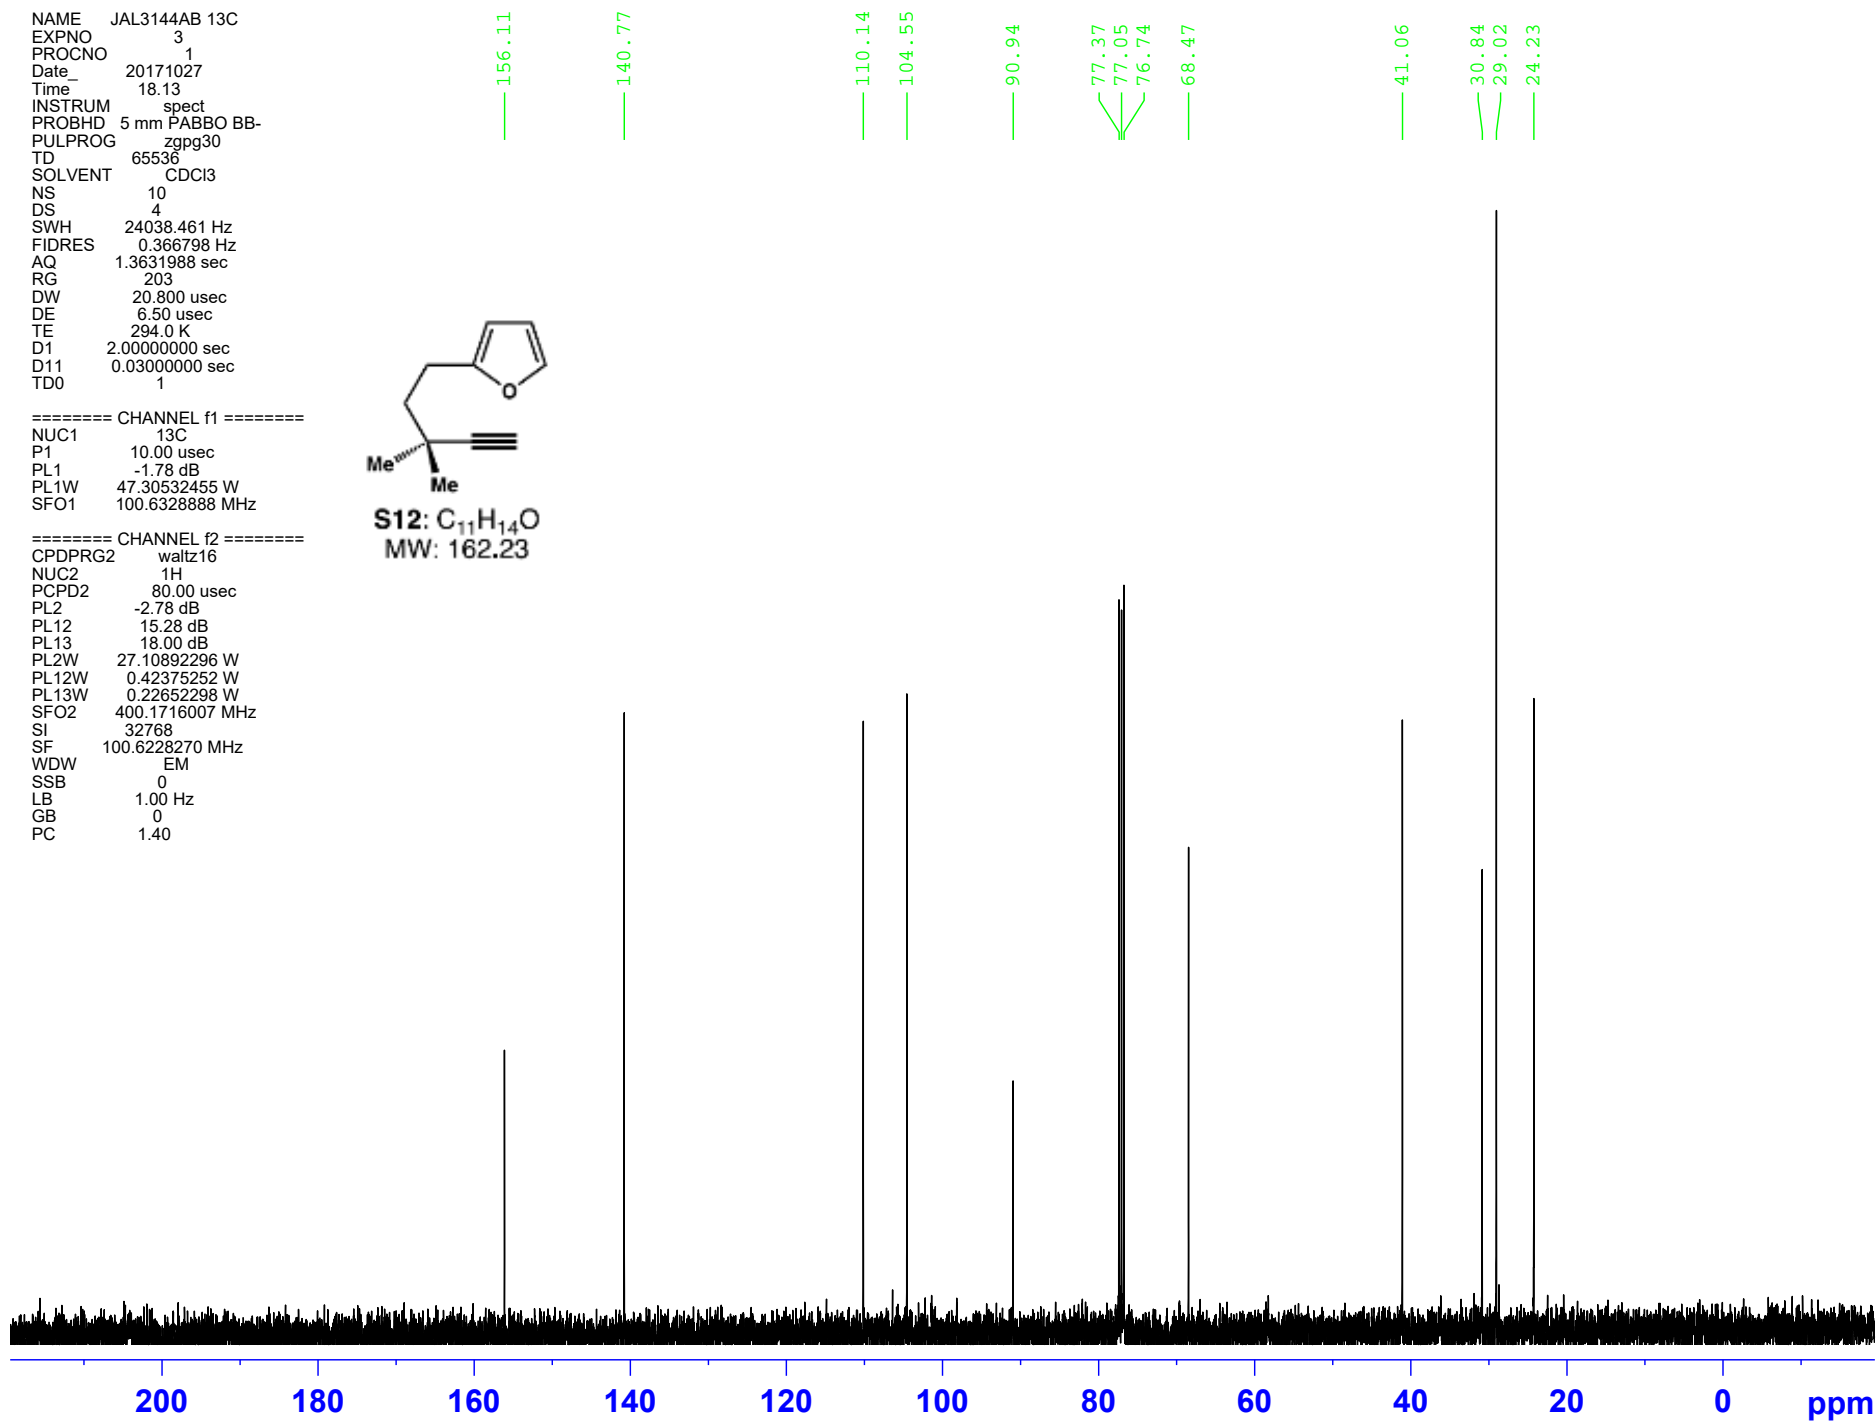

NAME JAL3214Ai 1H  
 EXPNO 1  
 PROCNO 1  
 Date\_ 20171211  
 Time 21.41  
 INSTRUM spect  
 PROBHD 5 mm PABBO BB-  
 PULPROG zg30  
 TD 65536  
 SOLVENT CDCl3  
 NS 8  
 DS 2  
 SWH 8223.685 Hz  
 FIDRES 0.125483 Hz  
 AQ 3.9846387 sec  
 RG 203  
 DW 60.800 usec  
 DE 6.50 usec  
 TE 294.8 K  
 D1 1.00000000 sec  
 TD0 1

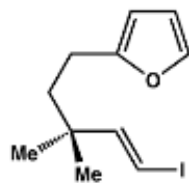

**S13: C<sub>11</sub>H<sub>15</sub>IO**  
 MW: 290.14

===== CHANNEL f1 =====  
 NUC1 1H  
 P1 10.00 usec  
 PL1 -2.78 dB  
 PL1W 27.10892296 W  
 SFO1 400.1724712 MHz  
 SI 32768  
 SF 400.1700083 MHz  
 WDW EM  
 SSB 0  
 LB 0.30 Hz  
 GB 0  
 PC 1.00

7.291  
 7.260  
 6.508  
 6.273  
 6.003  
 5.958

2.569  
 2.526  
 1.674  
 1.631  
 1.049

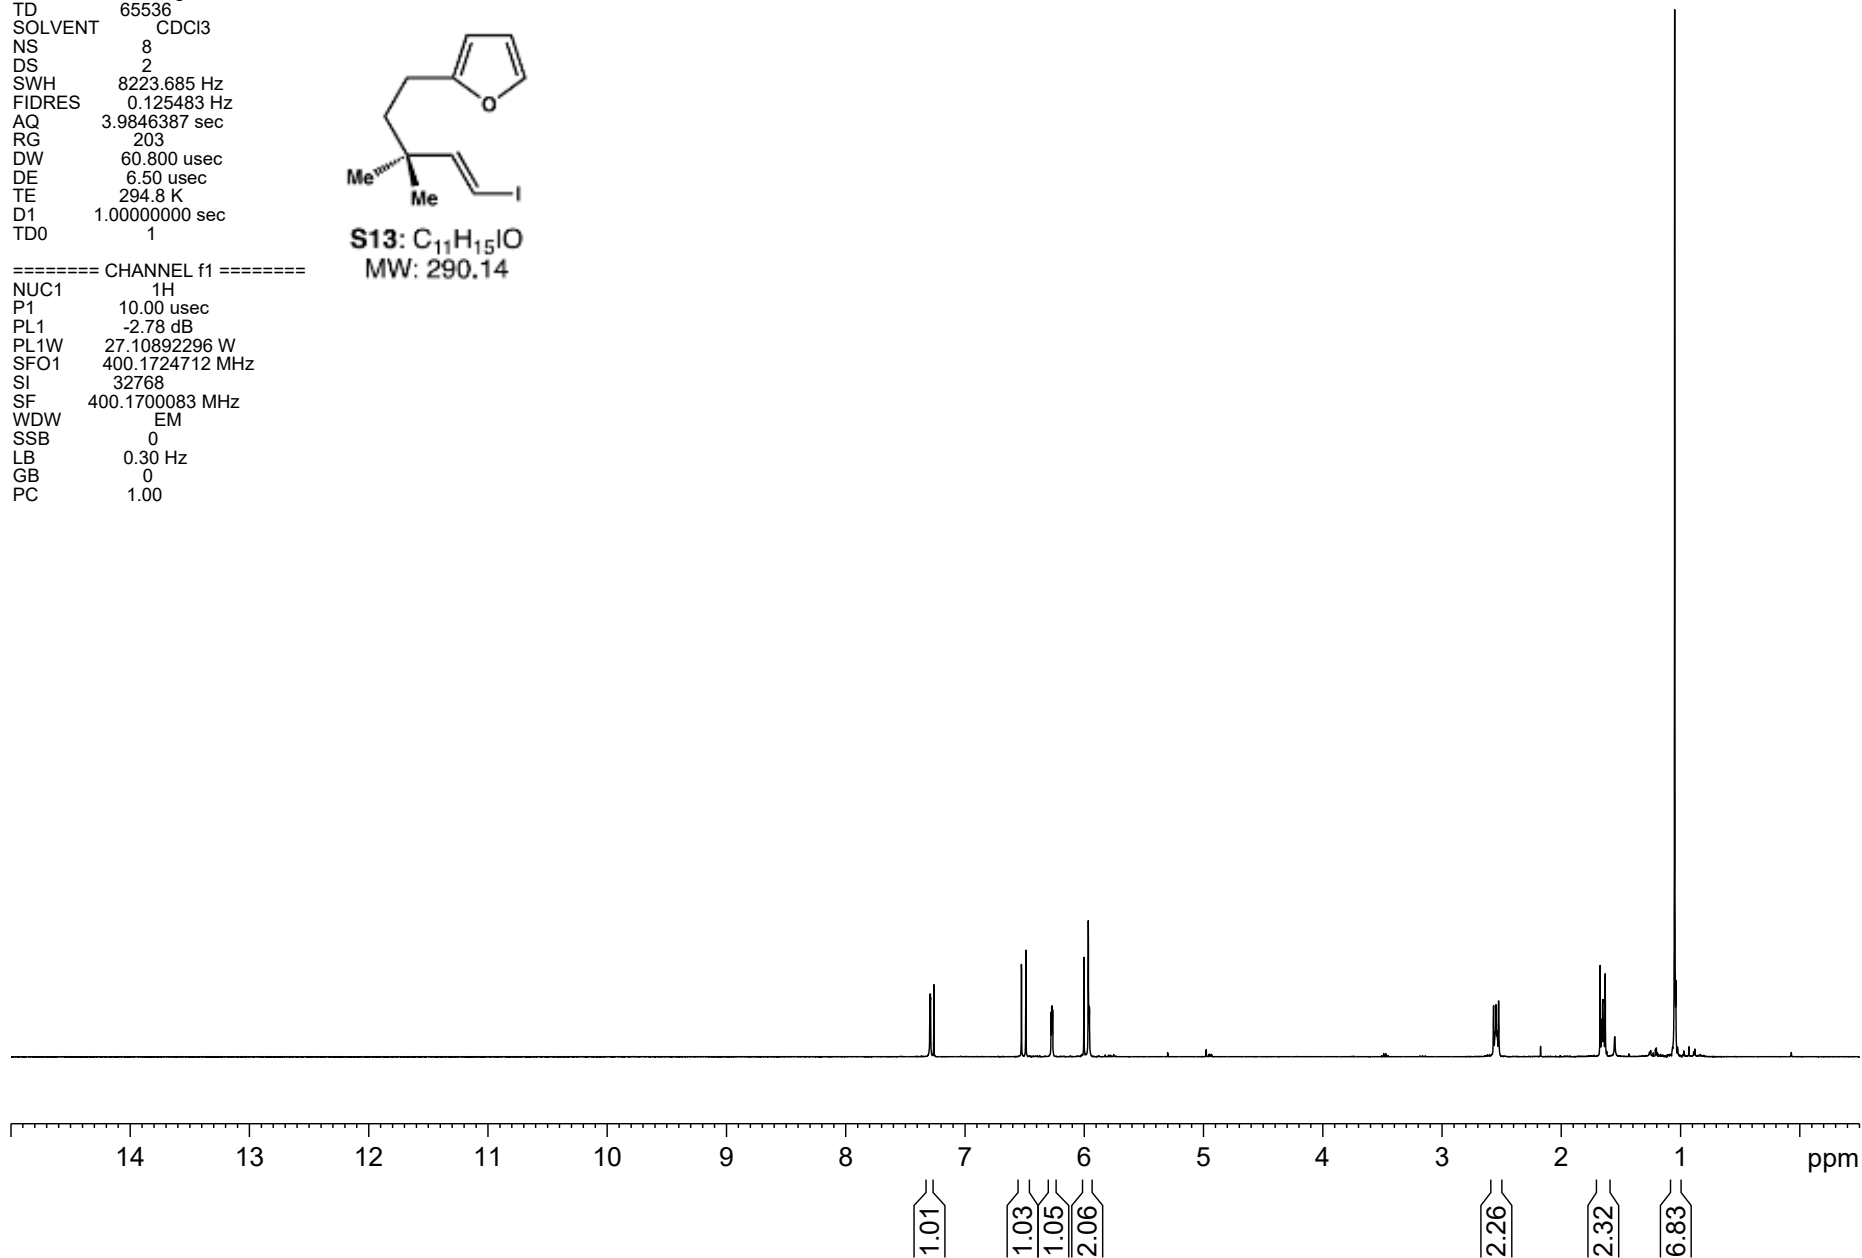

NAME JAL3214Ai 13C  
 EXPNO 1  
 PROCNO 1  
 Date\_ 20171211  
 Time 23.26  
 INSTRUM spect  
 PROBHD 5 mm PABBO BB-  
 PULPROG zgpg30  
 TD 65536  
 SOLVENT CDCl3  
 NS 315  
 DS 4  
 SWH 24038.461 Hz  
 FIDRES 0.366798 Hz  
 AQ 1.3631988 sec  
 RG 203  
 DW 20.800 usec  
 DE 6.50 usec  
 TE 295.6 K  
 D1 2.00000000 sec  
 D11 0.03000000 sec  
 TD0 1

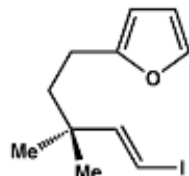

**S13: C<sub>11</sub>H<sub>15</sub>IO**  
**MW: 290.14**

===== CHANNEL f1 =====  
 NUC1 13C  
 P1 10.00 usec  
 PL1 -1.78 dB  
 PL1W 47.30532455 W  
 SFO1 100.6328888 MHz

===== CHANNEL f2 =====  
 CPDPRG2 waltz16  
 NUC2 1H  
 PCPD2 80.00 usec  
 PL2 -2.78 dB  
 PL12 15.28 dB  
 PL13 18.00 dB  
 PL2W 27.10892296 W  
 PL12W 0.42375252 W  
 PL13W 0.22652298 W  
 SFO2 400.1716007 MHz  
 SI 32768  
 SF 100.6228270 MHz  
 WDW EM  
 SSB 0  
 LB 1.00 Hz  
 GB 0  
 PC 1.40

156.06  
 154.96  
 140.78  
 110.13  
 104.50  
 77.33  
 77.01  
 76.70  
 73.07  
 40.70  
 40.11  
 26.21  
 23.48

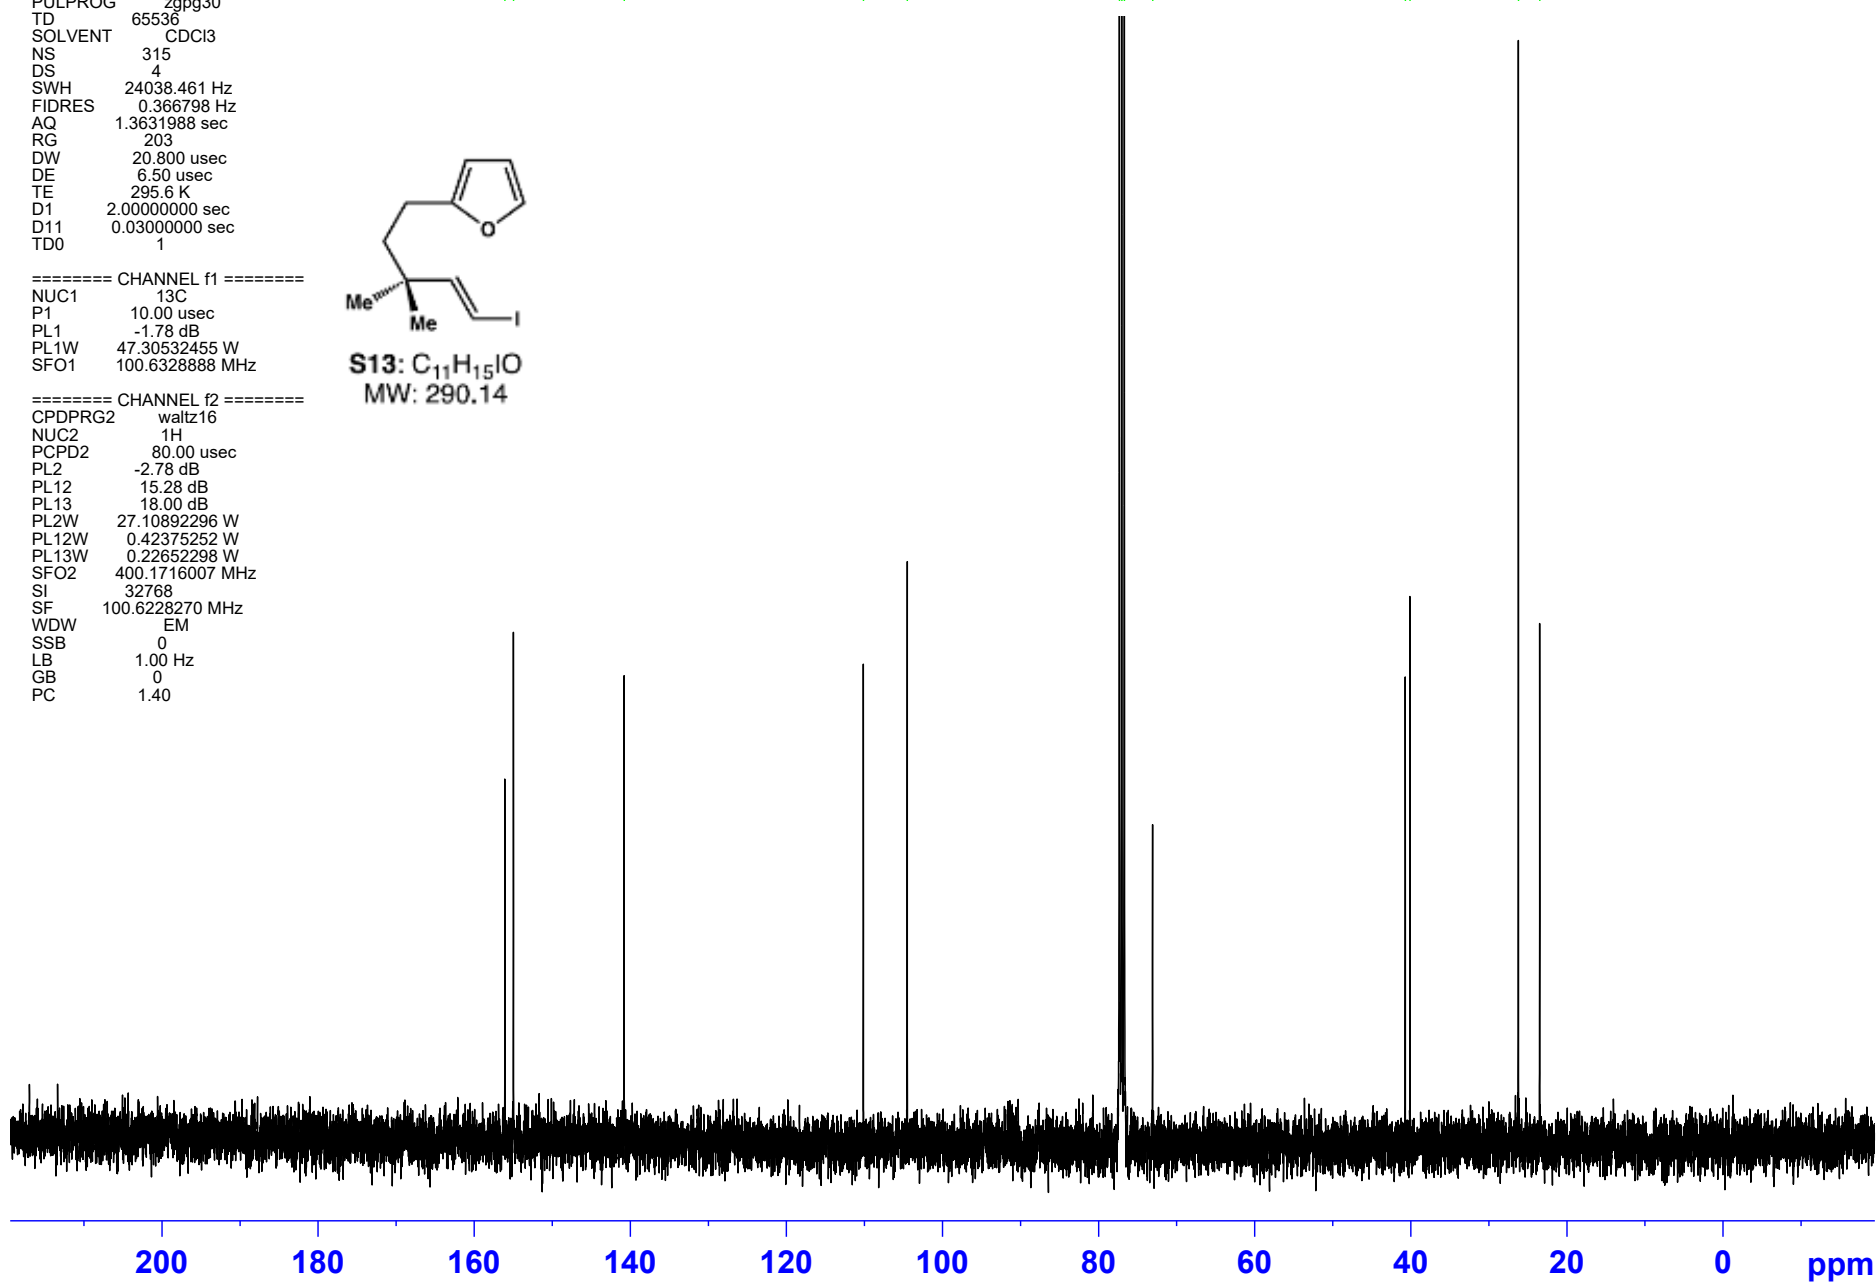

NAME JAL3216C 1H  
 EXPNO 1  
 PROCNO 1  
 Date\_ 20171212  
 Time 22.48  
 INSTRUM spect  
 PROBHD 5 mm PABBO BB-  
 PULPROG zg30  
 TD 65536  
 SOLVENT CDCl3  
 NS 8  
 DS 2  
 SWH 8223.685 Hz  
 FIDRES 0.125483 Hz  
 AQ 3.9846387 sec  
 RG 203  
 DW 60.800 usec  
 DE 6.50 usec  
 TE 294.7 K  
 D1 1.00000000 sec  
 TD0 1

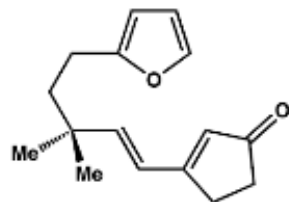

**12i:** C<sub>16</sub>H<sub>20</sub>O<sub>2</sub>  
 MW: 244.33

===== CHANNEL f1 =====  
 NUC1 1H  
 P1 10.00 usec  
 PL1 -2.78 dB  
 PL1W 27.10892296 W  
 SFO1 400.1724712 MHz  
 SI 32768  
 SF 400.1700087 MHz  
 WDW EM  
 SSB 0  
 LB 0.30 Hz  
 GB 0  
 PC 1.00

7.282  
 7.260  
 6.471  
 6.273  
 6.224  
 6.003  
 5.957

2.722  
 2.582  
 2.537  
 2.462  
 2.436  
 1.778  
 1.736  
 1.140

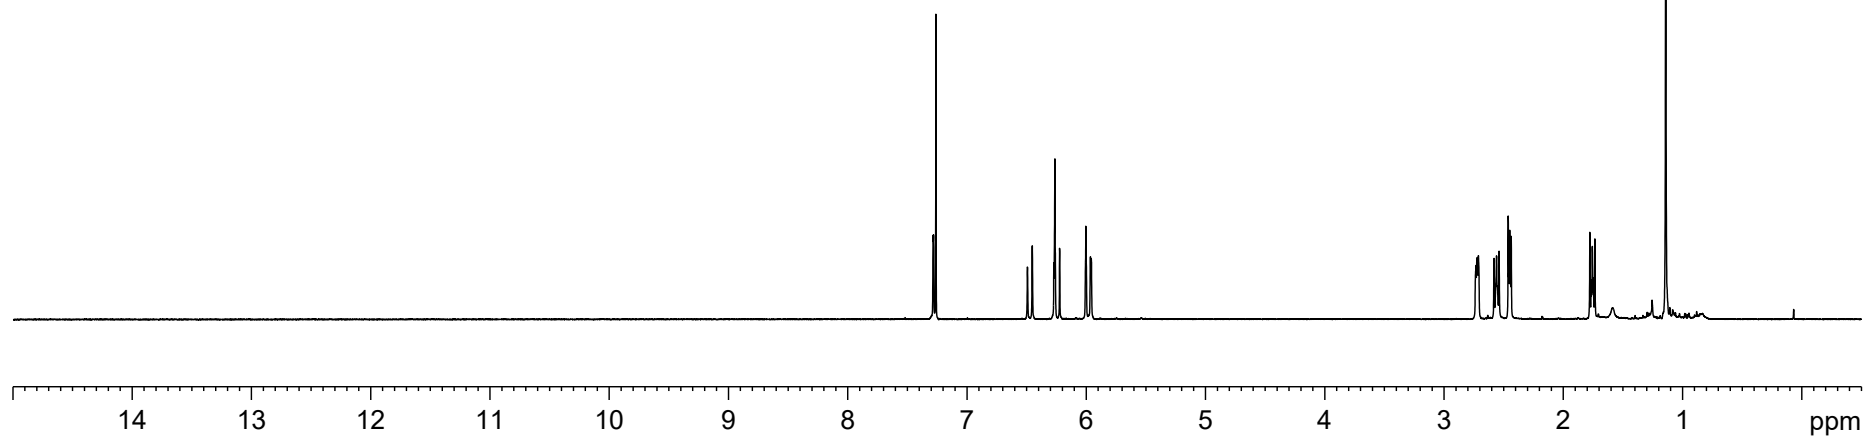

0.93  
 1.00  
 1.94  
 0.90  
 0.92

1.99  
 2.00  
 1.99  
 2.02  
 5.70

NAME JAL3216C 13C  
 EXPNO 3  
 PROCNO 1  
 Date\_ 20171212  
 Time 23.01  
 INSTRUM spect  
 PROBHD 5 mm PABBO BB-  
 PULPROG zgpg30  
 TD 65536  
 SOLVENT CDCl3  
 NS 50  
 DS 4  
 SWH 24038.461 Hz  
 FIDRES 0.366798 Hz  
 AQ 1.3631988 sec  
 RG 203  
 DW 20.800 usec  
 DE 6.50 usec  
 TE 295.3 K  
 D1 2.00000000 sec  
 D11 0.03000000 sec  
 TD0 1

172.78  
 155.93  
 149.08  
 140.77  
 129.67  
 123.24  
 110.16  
 104.62  
 77.41  
 77.10  
 76.78  
 40.48  
 36.79  
 34.74  
 27.05  
 26.60  
 23.61

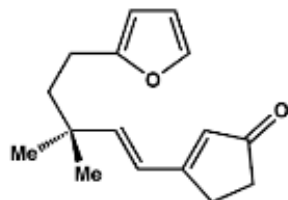

**12i: C<sub>16</sub>H<sub>20</sub>O<sub>2</sub>**  
**MW: 244.33**

===== CHANNEL f1 =====  
 NUC1 13C  
 P1 10.00 usec  
 PL1 -1.78 dB  
 PL1W 47.30532455 W  
 SFO1 100.6328888 MHz

===== CHANNEL f2 =====  
 CPDPRG2 waltz16  
 NUC2 1H  
 PCPD2 80.00 usec  
 PL2 -2.78 dB  
 PL12 15.28 dB  
 PL13 18.00 dB  
 PL2W 27.10892296 W  
 PL12W 0.42375252 W  
 PL13W 0.22652298 W  
 SFO2 400.1716007 MHz  
 SI 32768  
 SF 100.6228270 MHz  
 WDW EM  
 SSB 0  
 LB 1.00 Hz  
 GB 0  
 PC 1.40

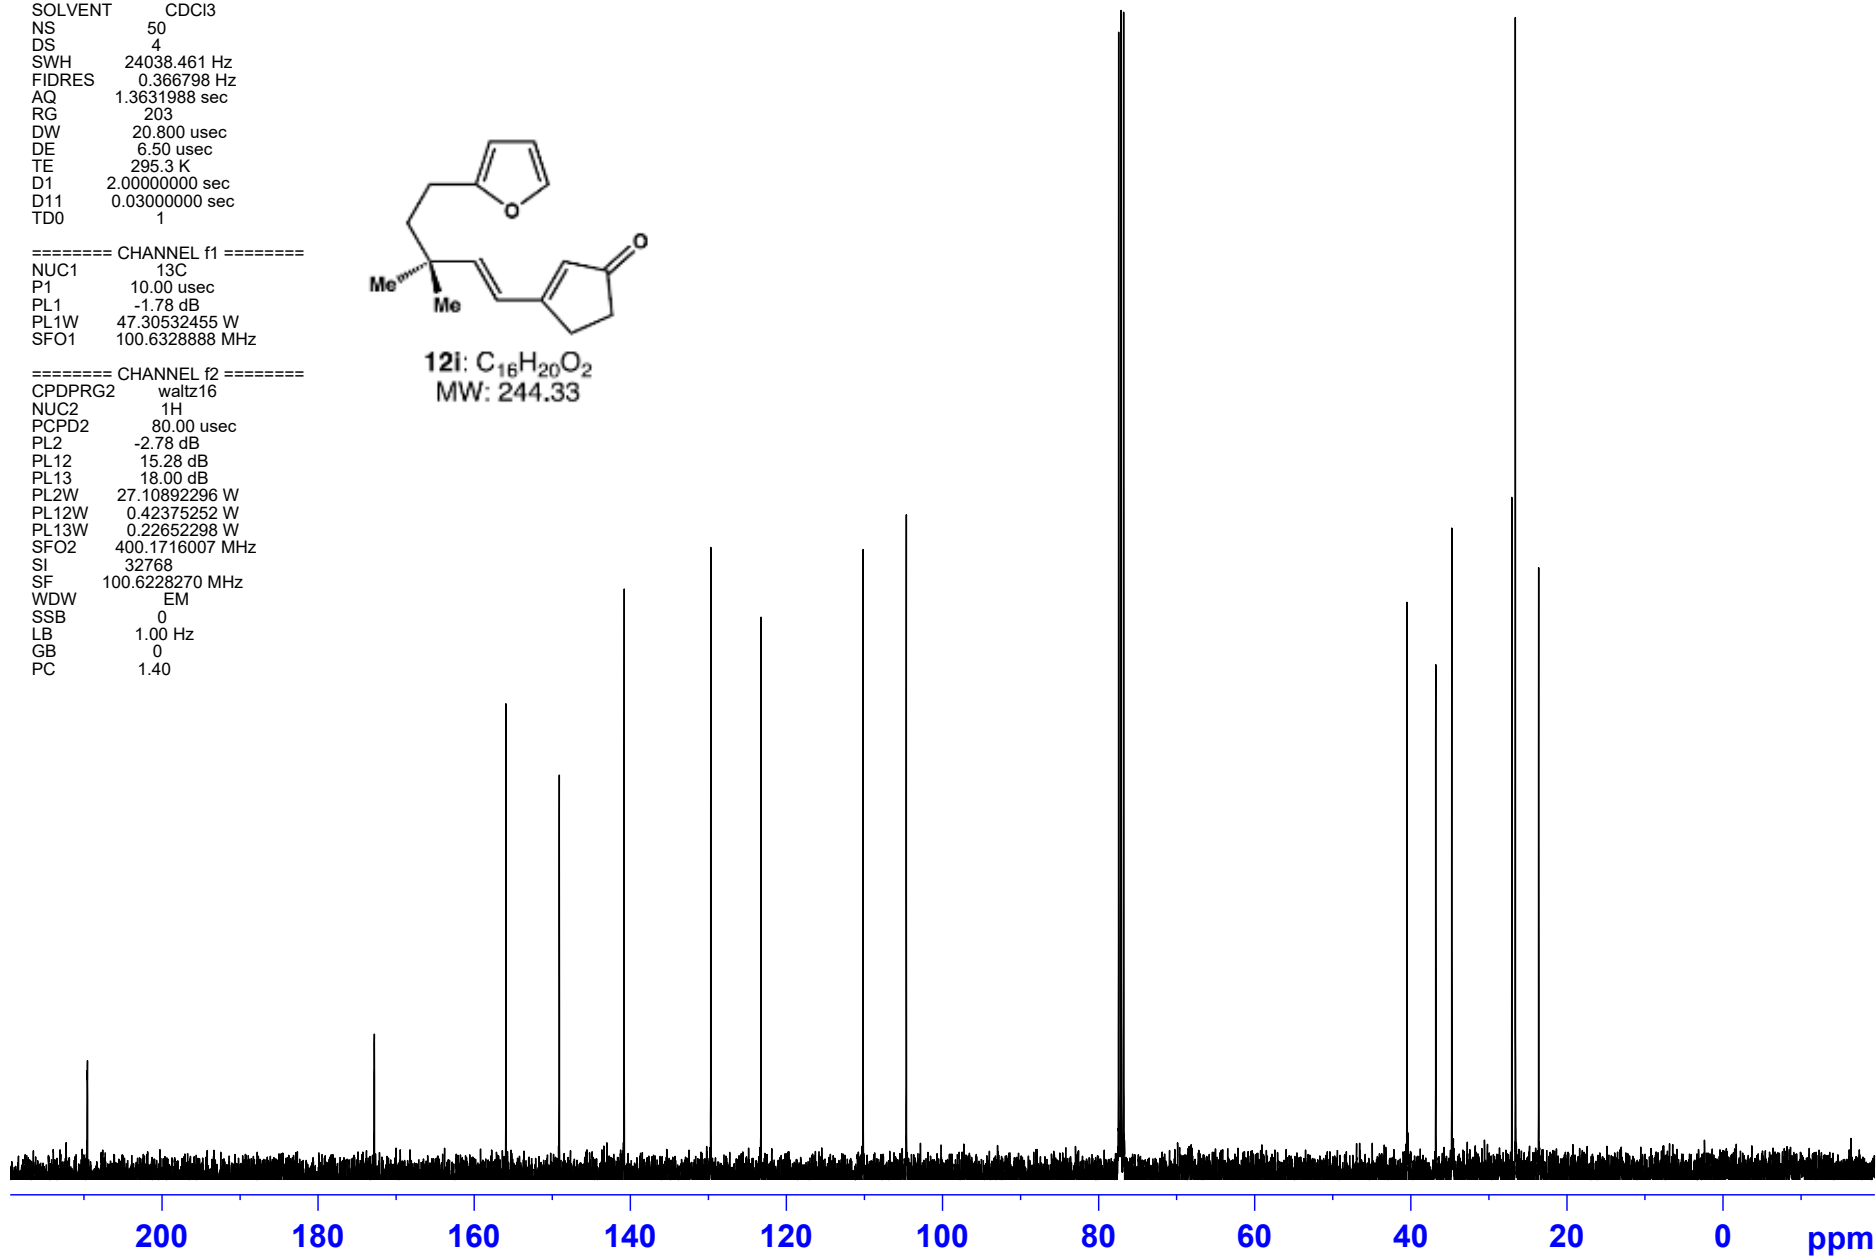

NAME AES 2233c  
 EXPNO 1  
 PROCNO 1  
 Date\_ 20160615  
 Time 2.04  
 INSTRUM spect  
 PROBHD 5 mm PABBO BB-  
 PULPROG zg30  
 TD 65536  
 SOLVENT CDCl3  
 NS 16  
 DS 2  
 SWH 8223.685 Hz  
 FIDRES 0.125483 Hz  
 AQ 3.9846387 sec  
 RG 57  
 DW 60.800 usec  
 DE 6.50 usec  
 TE 293.6 K  
 D1 1.00000000 sec  
 TD0 1

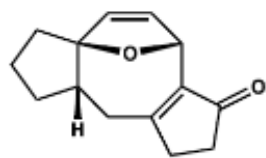

**3**: C<sub>14</sub>H<sub>16</sub>O<sub>2</sub>  
 MW: 216.28

===== CHANNEL f1 =====  
 NUC1 1H  
 P1 10.00 usec  
 PL1 -2.78 dB  
 PL1W 27.10892296 W  
 SFO1 400.1724712 MHz  
 SI 32768  
 SF 400.1700088 MHz  
 WDW EM  
 SSB 0  
 LB 0.30 Hz  
 GB 0  
 PC 1.00

7.260  
 6.084  
 5.863  
 5.450  
 2.586  
 2.467  
 2.410  
 2.256  
 2.170  
 2.112  
 1.938  
 1.701  
 1.345  
 1.255

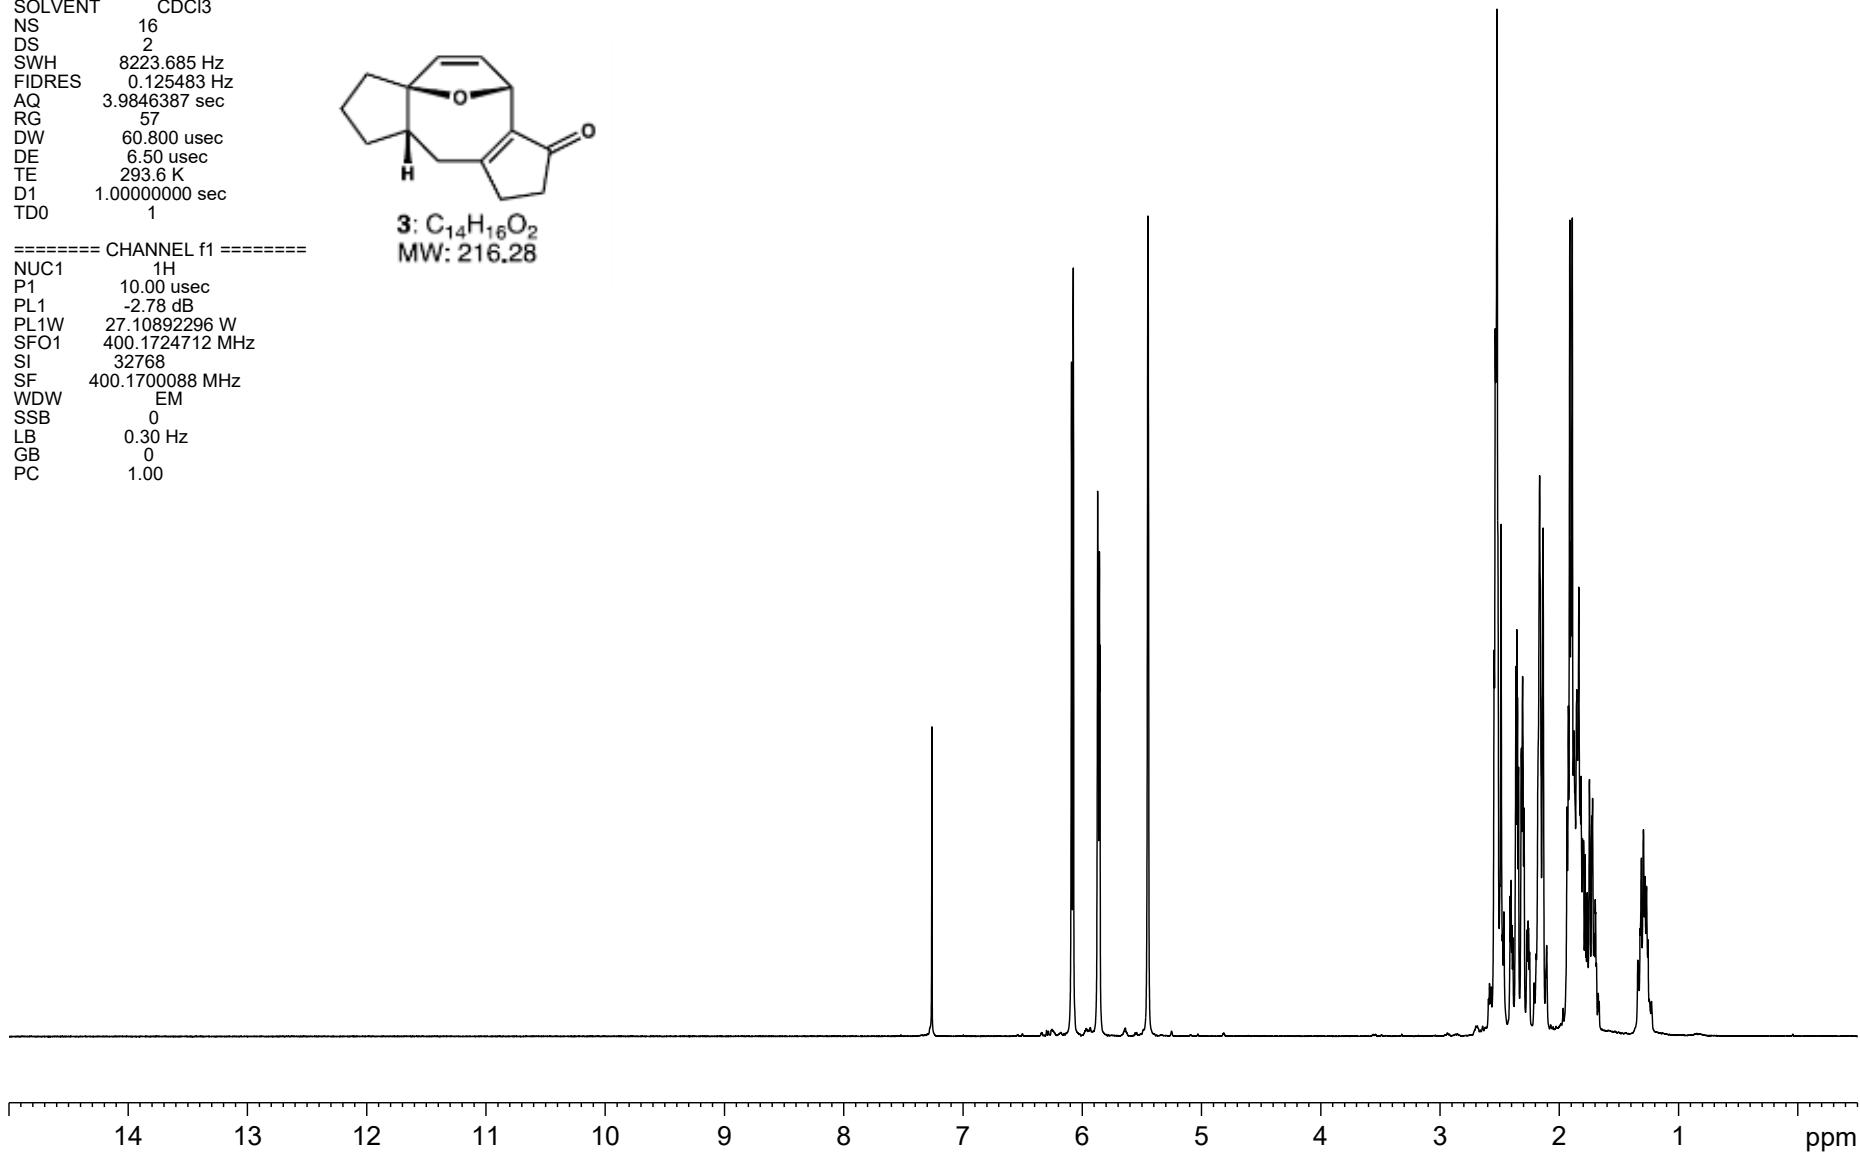

1.00  
 0.99  
 0.94  
 3.15  
 2.19  
 2.08  
 5.46  
 1.06

NAME AES 2235 pure C13  
 EXPNO 1  
 PROCNO 1  
 Date\_ 20160618  
 Time\_ 20:16:16  
 INSTRUM spect  
 PROBHD 5 mm PABBO BB-  
 PULPROG zgpg30  
 TD 65536  
 SOLVENT CDCl3  
 NS 256  
 DS 4  
 SWH 24038.461 Hz  
 FIDRES 0.366798 Hz  
 AQ 1.3631988 sec  
 RG 203  
 DW 20.800 usec  
 DE 6.50 usec  
 TE 294.8 K  
 D1 2.00000000 sec  
 D11 0.03000000 sec  
 TD0 1

176.33

142.08

129.43

128.55

96.57

77.38

77.07

76.75

74.66

49.21

34.59

34.39

33.95

32.12

28.93

20.09

===== CHANNEL f1 =====  
 NUC1 13C  
 P1 10.00 usec  
 PL1 -1.78 dB  
 PL1W 47.30532455 W  
 SFO1 100.6328888 MHz

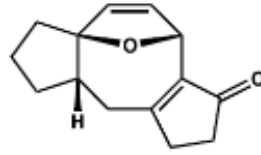

**3:** C<sub>14</sub>H<sub>16</sub>O<sub>2</sub>  
 MW: 216.28

===== CHANNEL f2 =====  
 CPDPRG2 waltz16  
 NUC2 1H  
 PCPD2 80.00 usec  
 PL2 -2.78 dB  
 PL12 15.28 dB  
 PL13 18.00 dB  
 PL2W 27.10892296 W  
 PL12W 0.42375252 W  
 PL13W 0.22652298 W  
 SFO2 400.1716007 MHz  
 SI 32768  
 SF 100.6228270 MHz  
 WDW EM  
 SSB 0  
 LB 1.00 Hz  
 GB 0  
 PC 1.40

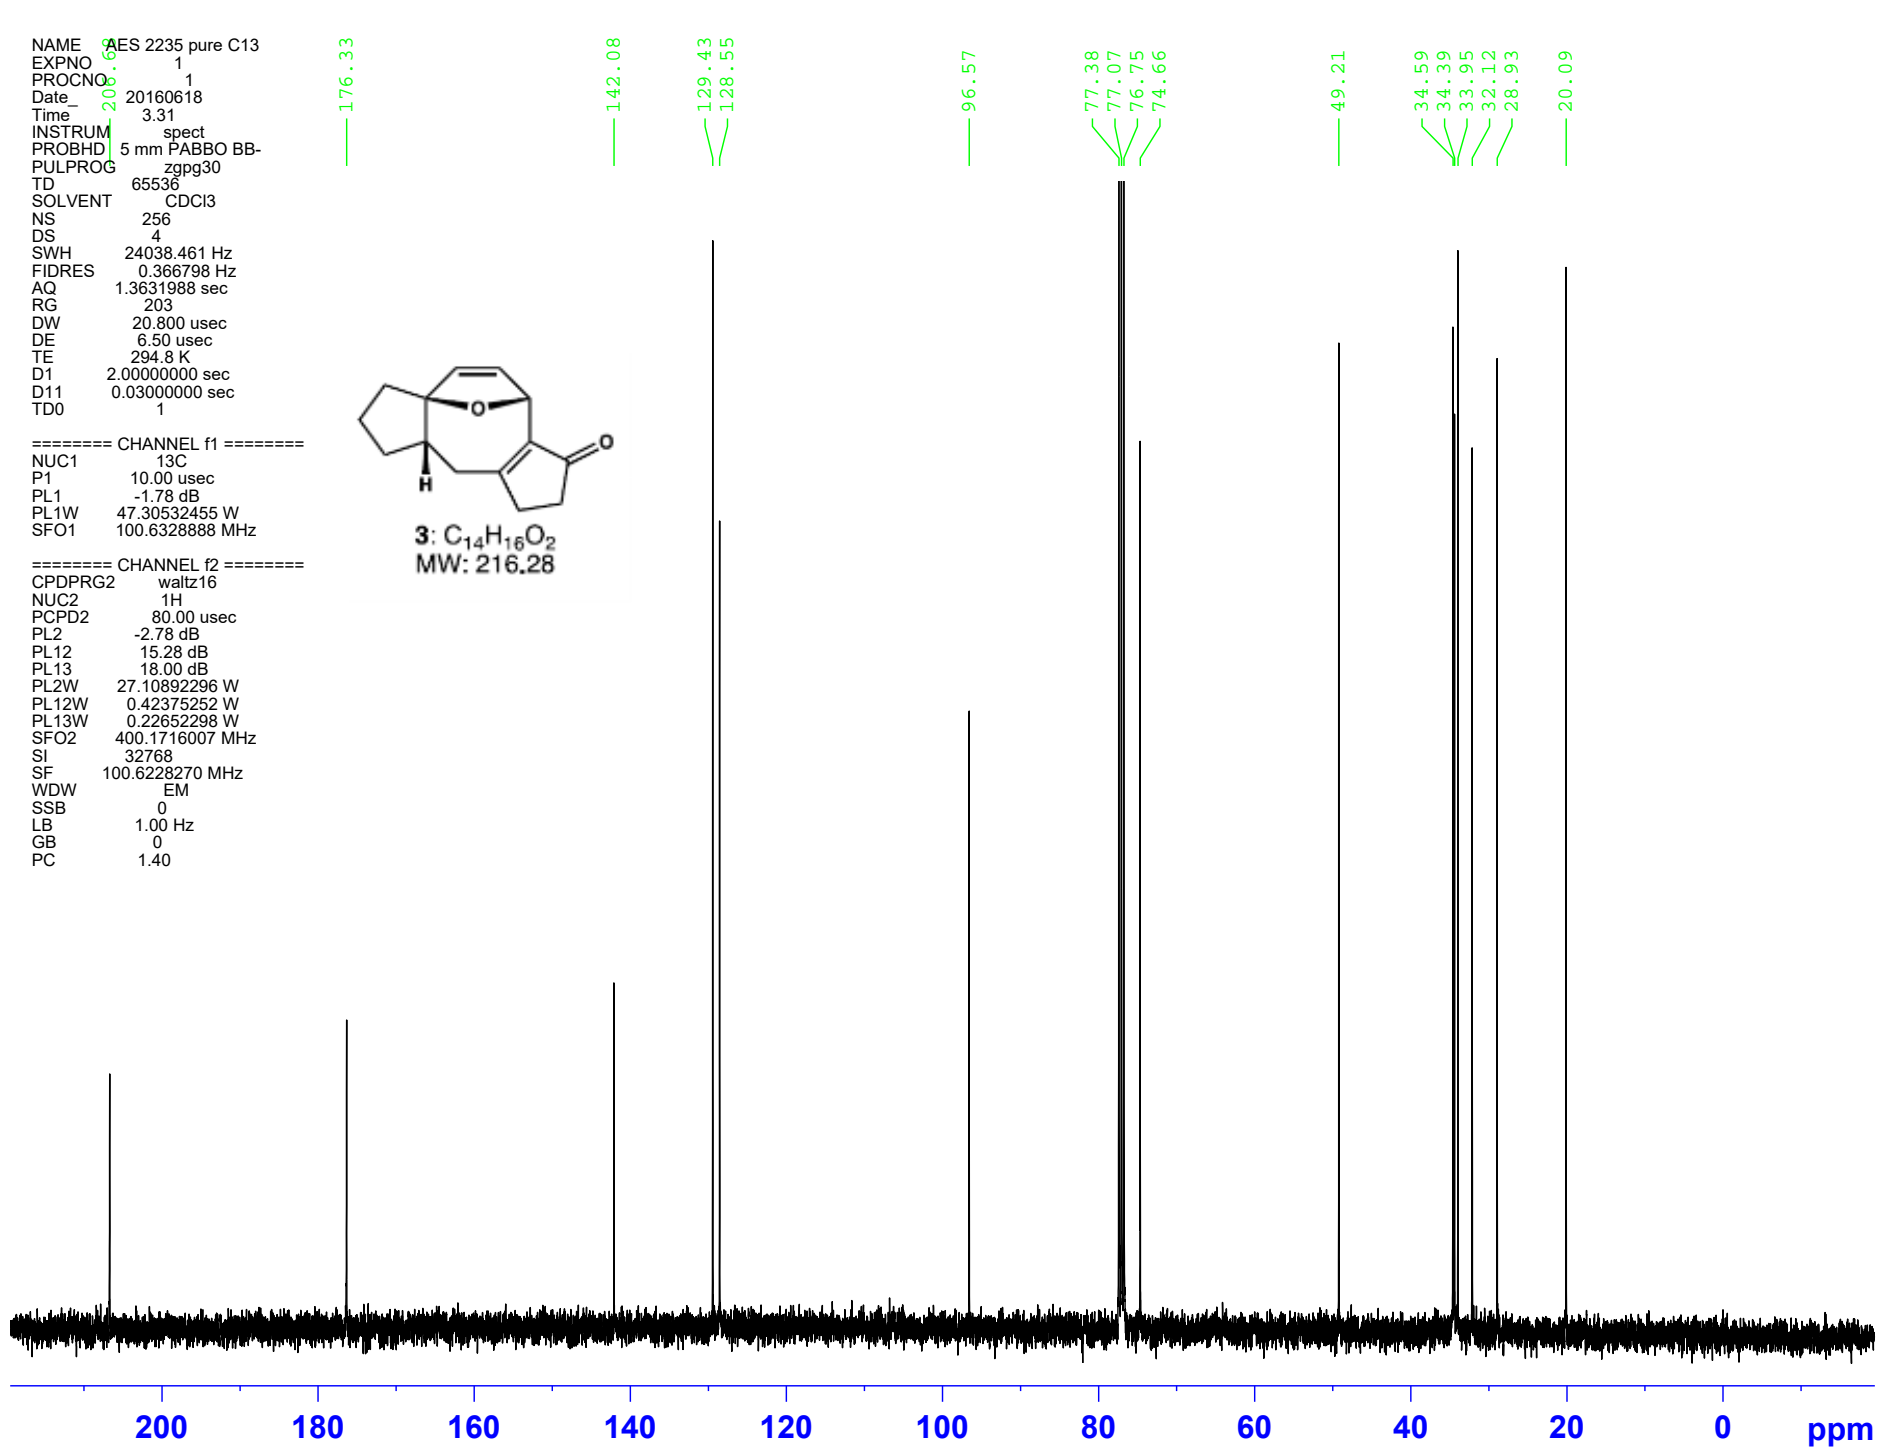

NAME AES 2181 1H  
 EXPNO 1  
 PROCNO 1  
 Date\_ 20160511  
 Time 18.28  
 INSTRUM spect  
 PROBHD 5 mm PABBO BB-  
 PULPROG zg30  
 TD 65536  
 SOLVENT CDCl3  
 NS 16  
 DS 2  
 SWH 12335.526 Hz  
 FIDRES 0.188225 Hz  
 AQ 2.6564426 sec  
 RG 144  
 DW 40.533 usec  
 DE 6.50 usec  
 TE 293.6 K  
 D1 1.00000000 sec  
 TD0 1

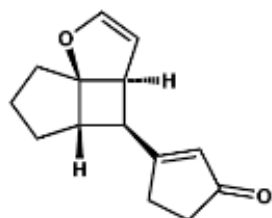

5: C<sub>14</sub>H<sub>16</sub>O<sub>2</sub>  
 MW: 216.28

===== CHANNEL f1 =====  
 NUC1 1H  
 P1 14.00 usec  
 PL1 -1.40 dB  
 PL1W 16.22728539 W  
 SFO1 600.1337060 MHz  
 SI 32768  
 SF 600.1300160 MHz  
 WDW EM  
 SSB 0  
 LB 0.30 Hz  
 GB 0  
 PC 1.00

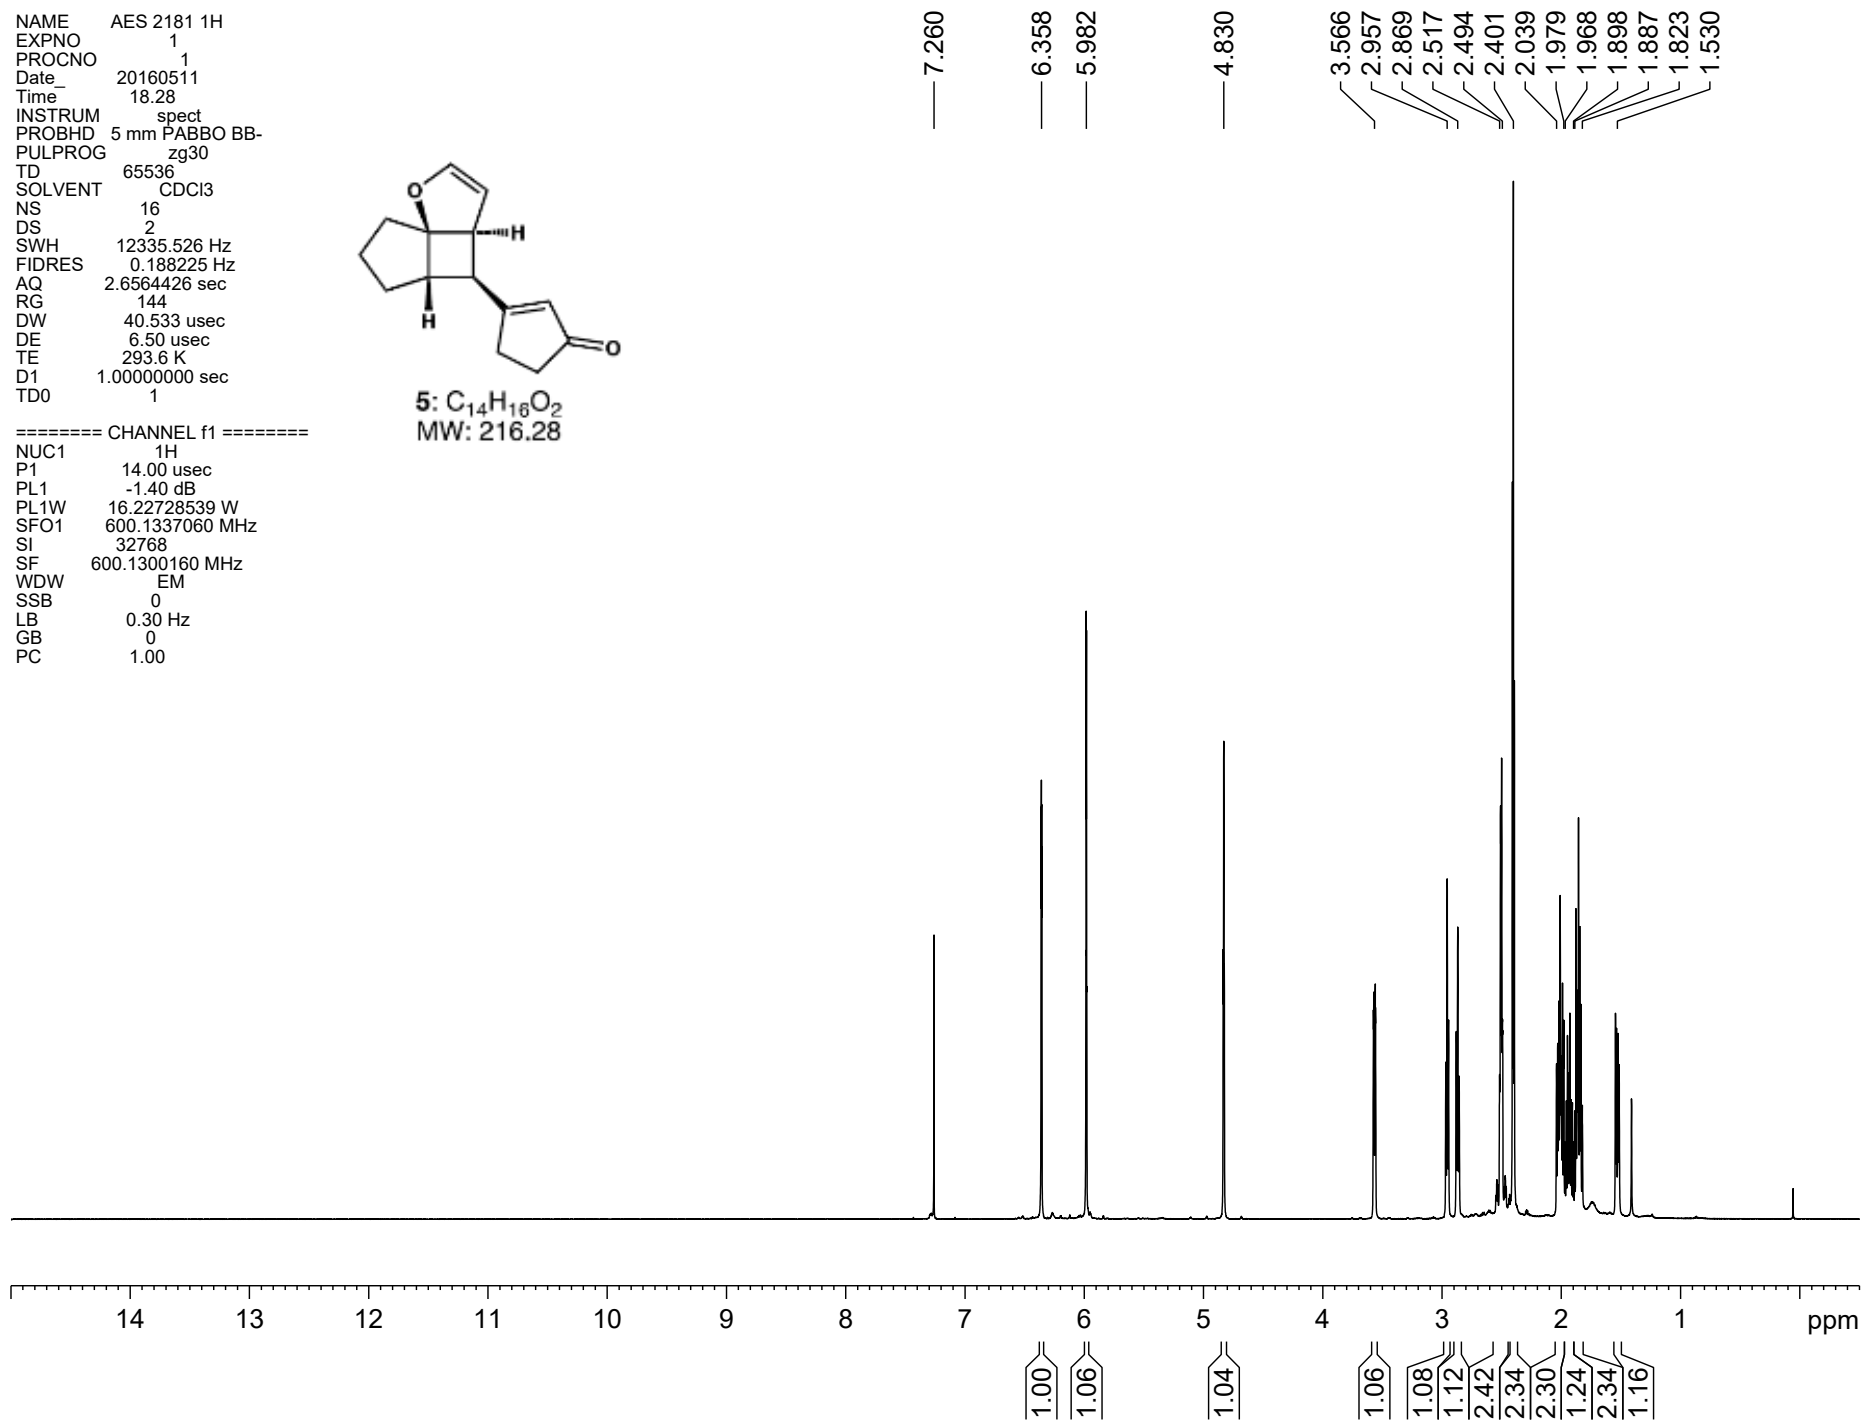



NAME: AES 2181 C13  
 EXPNO: 1  
 PROCNO: 1  
 Date\_20160511  
 Time: 21.59  
 INSTRUM: spect  
 PROBHD: 5 mm PABBO BB-  
 PULPROG: zgpg30  
 TD: 65536  
 SOLVENT: CDCl3  
 NS: 4096  
 DS: 4  
 SWH: 36057.691 Hz  
 FIDRES: 0.550197 Hz  
 AQ: 0.9088159 sec  
 RG: 203  
 DW: 13.867 usec  
 DE: 6.50 usec  
 TE: 298.3 K  
 D1: 2.00000000 sec  
 D11: 0.03000000 sec  
 TD0: 1

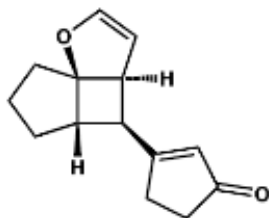

**5: C<sub>14</sub>H<sub>16</sub>O<sub>2</sub>**  
**MW: 216.28**

===== CHANNEL f1 ==  
 NUC1: 13C  
 P1: 9.50 usec  
 PL1: 3.00 dB  
 PL1W: 59.92485046 W  
 SFO1: 150.9178988 MHz

===== CHANNEL f2 =====  
 CPDPRG2: waltz16  
 NUC2: 1H  
 PCPD2: 80.00 usec  
 PL2: -1.40 dB  
 PL12: 13.74 dB  
 PL13: 13.70 dB  
 PL2W: 16.22728539 W  
 PL12W: 0.49687356 W  
 PL13W: 0.50147104 W  
 SFO2: 600.1324005 MHz  
 SI: 32768  
 SF: 150.9028090 MHz  
 WDW: EM  
 SSB: 0  
 LB: 1.00 Hz  
 GB: 0  
 PC: 1.40

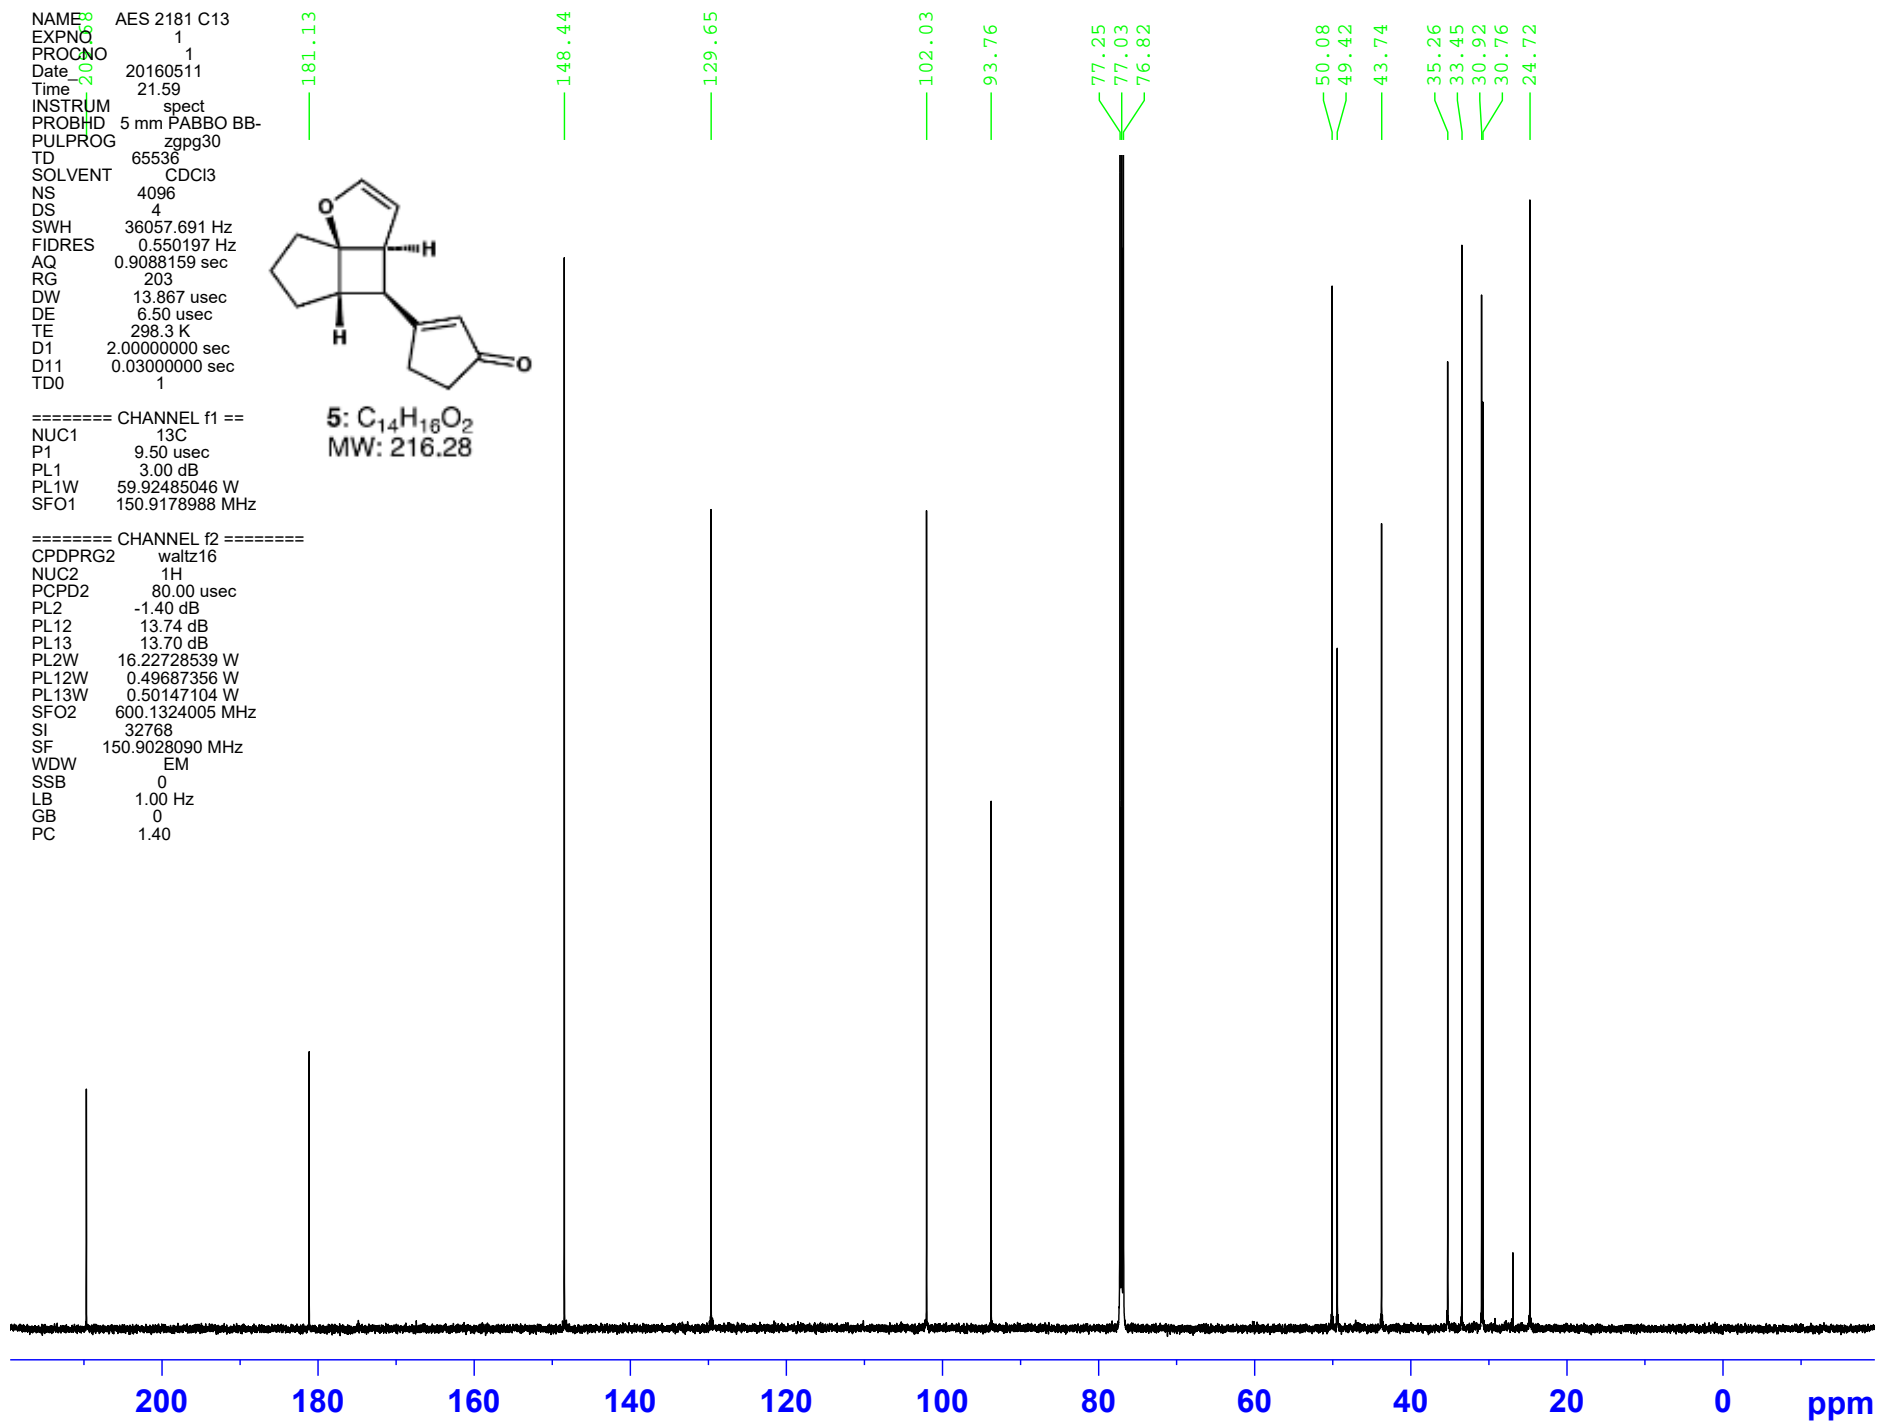

NAME AES 5186 Cope 1.5h 100C  
 EXPNO 1  
 PROCNO 1  
 Date\_ 20180116  
 Time 21.03  
 INSTRUM spect  
 PROBHD 5 mm PABBO BB-  
 PULPROG zg30  
 TD 65536  
 SOLVENT Tol  
 NS 8  
 DS 2  
 SWH 12335.526 Hz  
 FIDRES 0.188225 Hz  
 AQ 2.6564426 sec  
 RG 203  
 DW 40.533 usec  
 DE 6.50 usec  
 TE 298.2 K  
 D1 1.00000000 sec  
 TD0 1

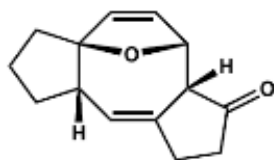

**6:** C<sub>14</sub>H<sub>16</sub>O<sub>2</sub>  
 MW: 216.28

===== CHANNEL f1 =====  
 NUC1 1H  
 P1 13.00 usec  
 PL1 -1.40 dB  
 PL1W 16.22728539 W  
 SFO1 600.1337060 MHz  
 SI 32768  
 SF 600.1300000 MHz  
 WDW EM  
 SSB 0  
 LB 0.30 Hz  
 GB 0  
 PC 1.00

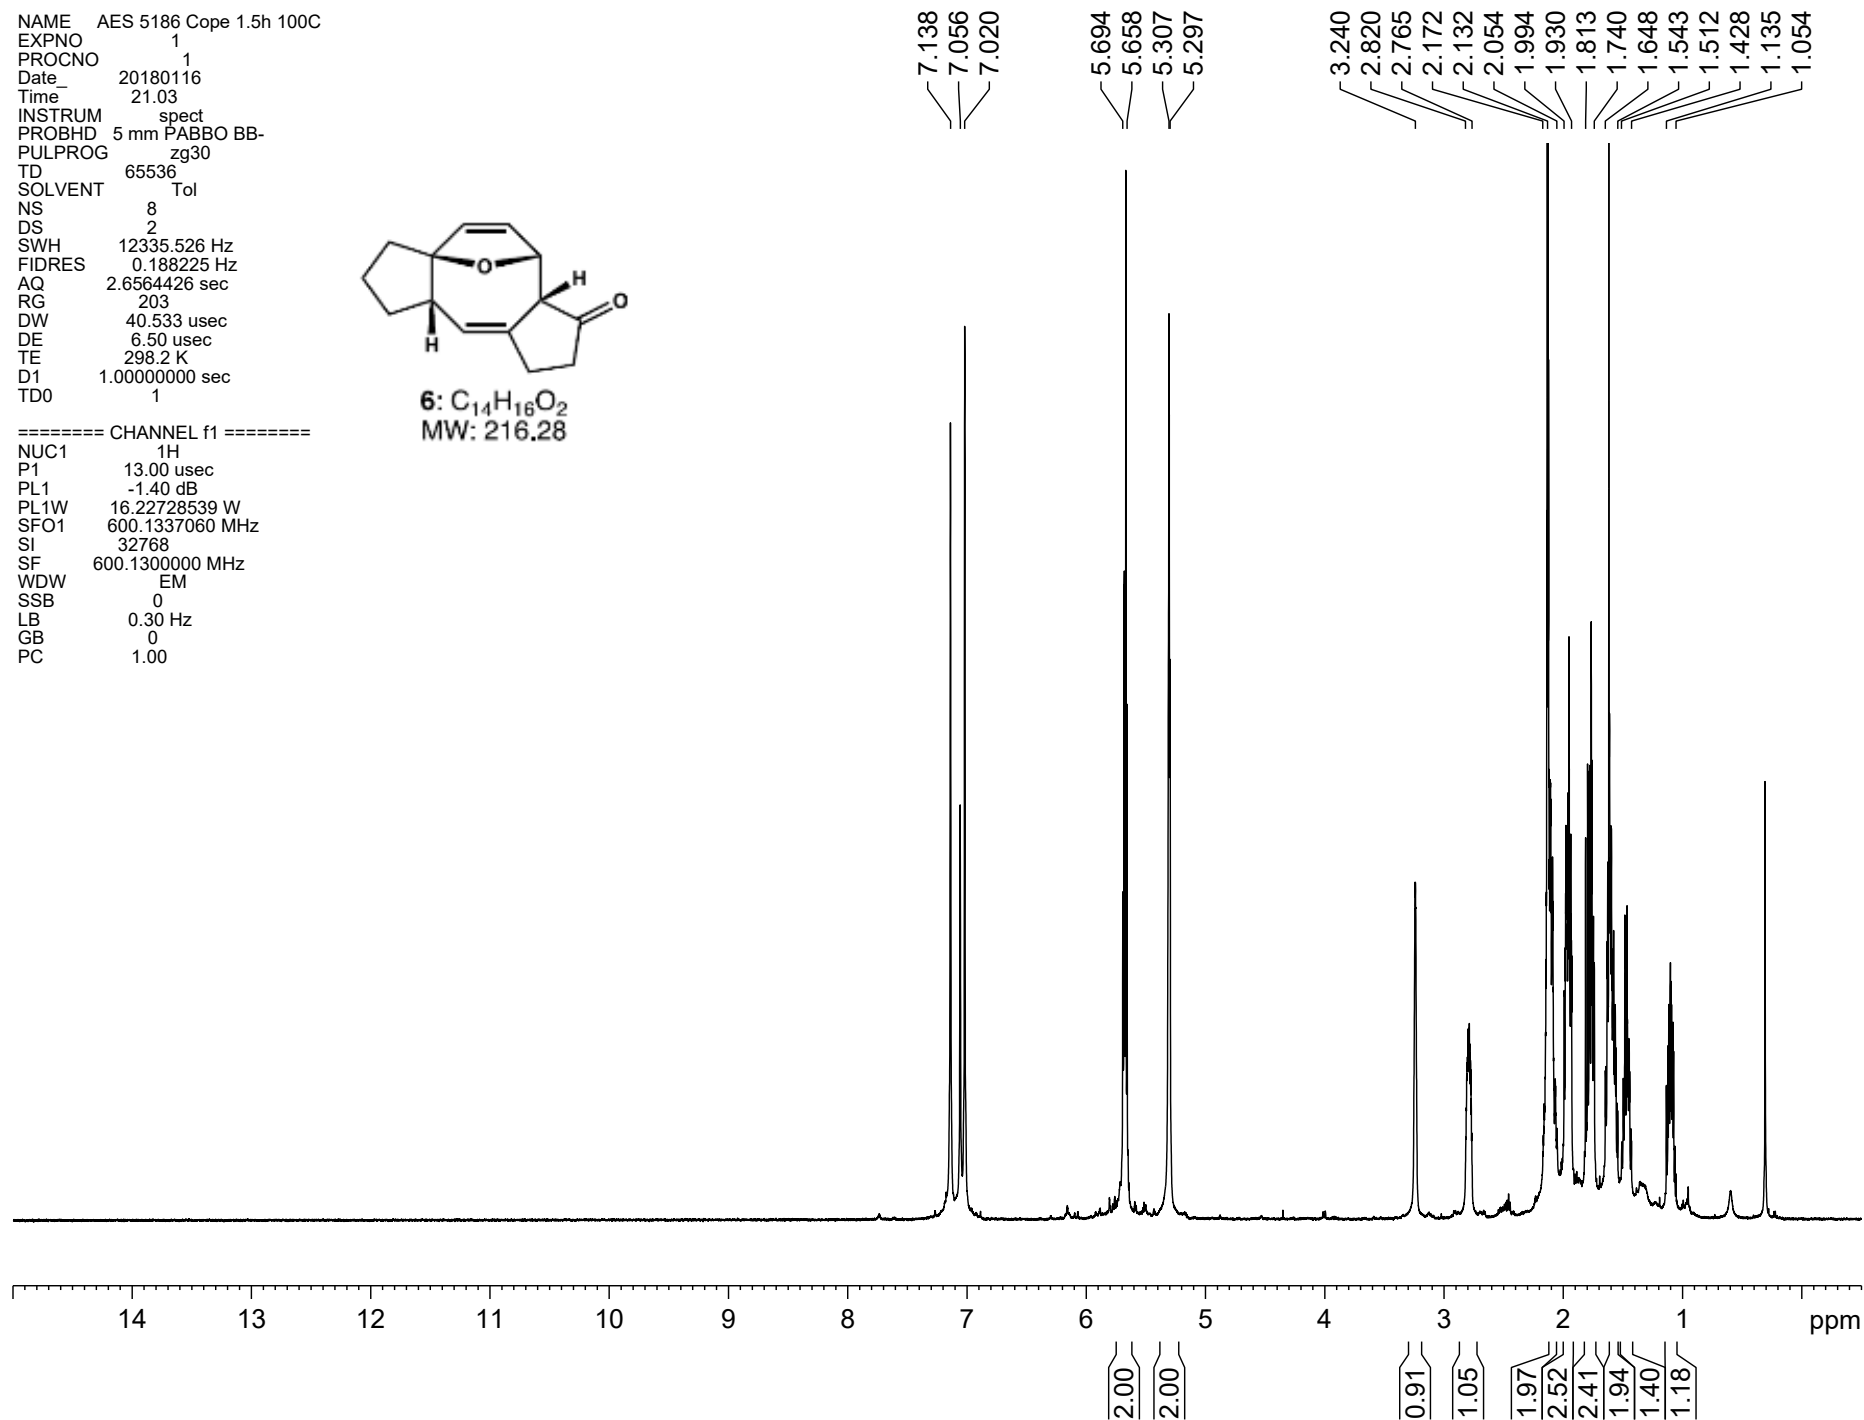

NAME AES 5186 Cope 1.5h 100C C13  
 EXPNO 1  
 PROCNO 1  
 Date\_ 20180116  
 Time 21.11  
 INSTRUM spect  
 PROBHD 5 mm PABBO BB-  
 PULPROG zgpg30  
 TD 65536  
 SOLVENT Tol  
 NS 13990  
 DS 4  
 SWH 39062.500 Hz  
 FIDRES 0.596046 Hz  
 AQ 0.8389108 sec  
 RG 203  
 DW 12.800 usec  
 DE 6.50 usec  
 TE 298.3 K  
 D1 2.00000000 sec  
 D11 0.03000000 sec  
 TD0 1

===== CHANNEL f1 =====  
 NUC1 13C  
 P1 9.50 usec  
 PL1 3.00 dB  
 PL1W 59.92485046 W  
 SFO1 150.9178988 MHz

===== CHANNEL f2 =====  
 CPDPRG2 waltz16  
 NUC2 1H  
 PCPD2 80.00 usec  
 PL2 -1.40 dB  
 PL12 14.38 dB  
 PL13 13.70 dB  
 PL2W 16.22728539 W  
 PL12W 0.42879117 W  
 PL13W 0.50147104 W  
 SFO2 600.1324005 MHz  
 SI 32768  
 SF 150.9028090 MHz  
 WDW EM  
 SSB 0  
 LB 1.00 Hz  
 GB 0  
 PC 1.40

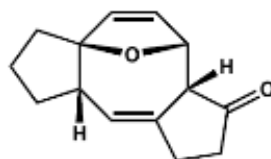

**6: C<sub>14</sub>H<sub>16</sub>O<sub>2</sub>**  
**MW: 216.28**

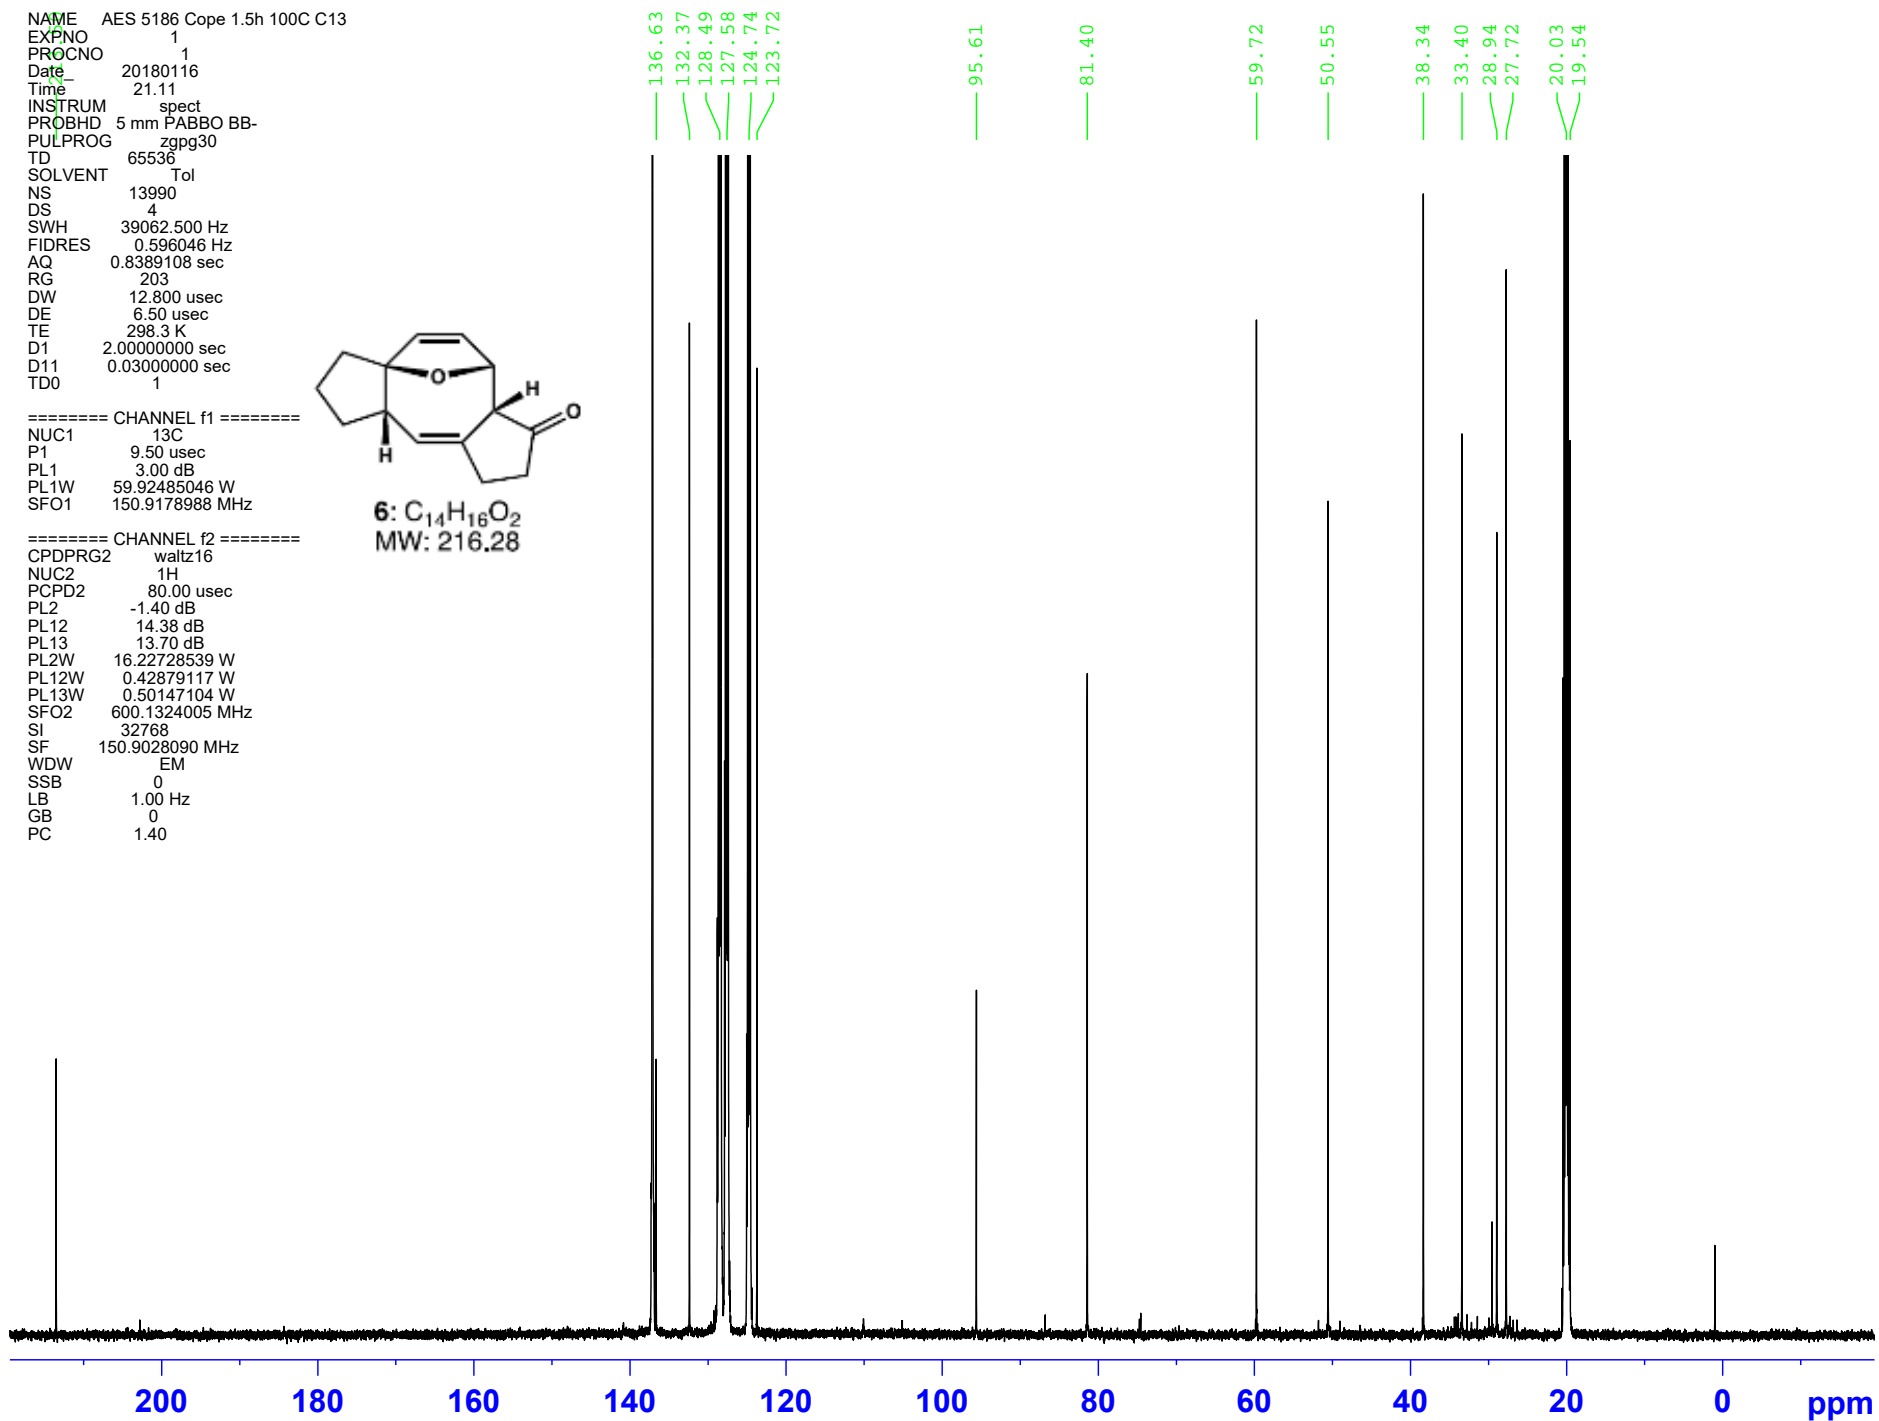

NAME AES 5050b  
 EXPNO 1  
 PROCNO 1  
 Date\_ 20171030  
 Time 9.46  
 INSTRUM spect  
 PROBHD 5 mm PABBO BB-  
 PULPROG zg30  
 TD 65536  
 SOLVENT CDCl3  
 NS 8  
 DS 2  
 SWH 8223.685 Hz  
 FIDRES 0.125483 Hz  
 AQ 3.9846387 sec  
 RG 181  
 DW 60.800 usec  
 DE 6.50 usec  
 TE 293.9 K  
 D1 1.00000000 sec  
 TD0 1

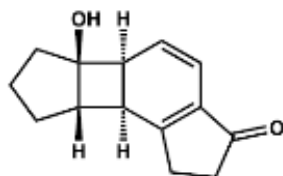

11: C<sub>14</sub>H<sub>16</sub>O<sub>2</sub>  
 MW: 216.28

===== CHANNEL f1 =====  
 NUC1 1H  
 P1 10.00 usec  
 PL1 -2.78 dB  
 PL1W 27.10892296 W  
 SFO1 400.1724712 MHz  
 SI 32768  
 SF 400.1700094 MHz  
 WDW EM  
 SSB 0  
 LB 0.30 Hz  
 GB 0  
 PC 1.00

7.260  
 6.374  
 5.633  
 3.363  
 2.672  
 2.543  
 2.462  
 2.437  
 2.362  
 2.305  
 1.980  
 1.789  
 1.691  
 1.626

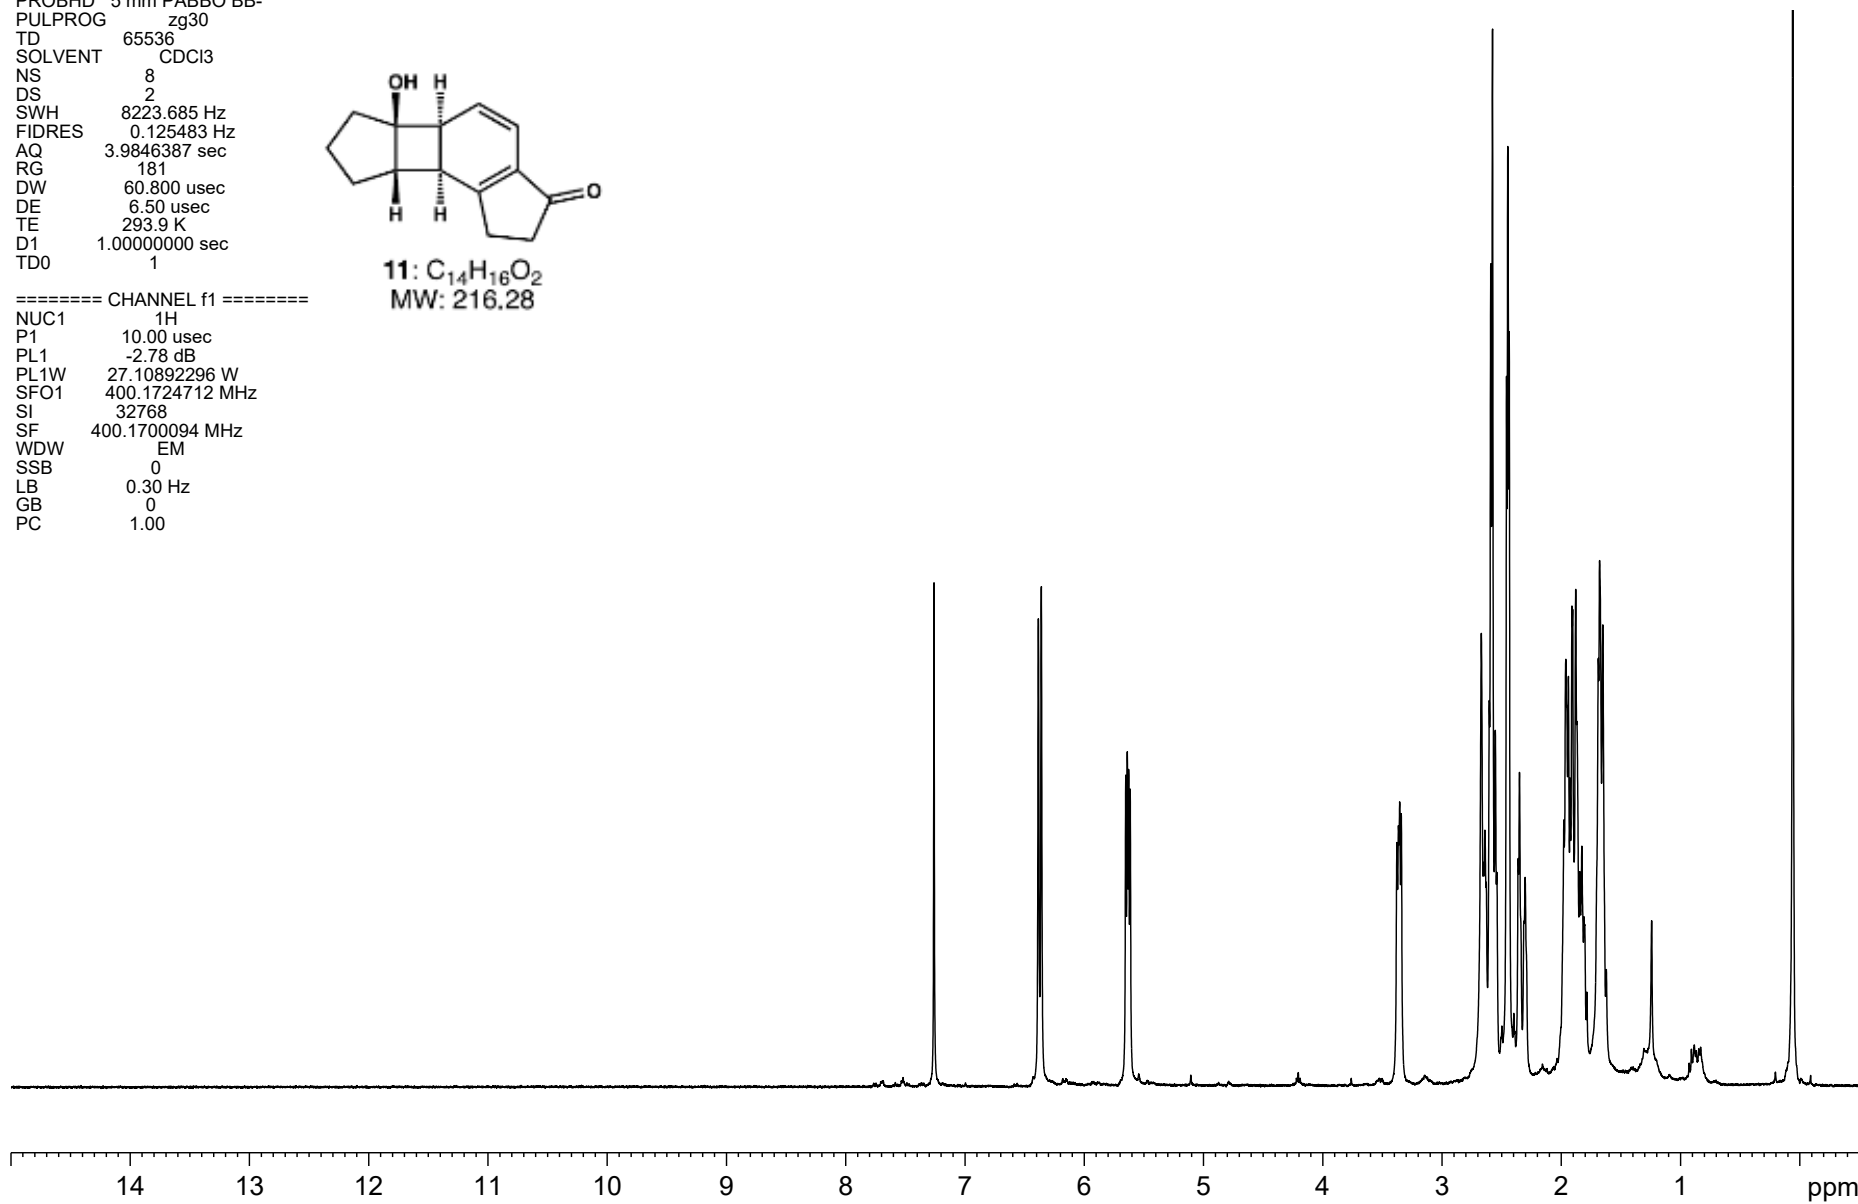

1.00  
 1.03  
 1.05  
 4.19  
 2.18  
 1.27  
 4.52  
 2.37

NAME AES 5052b C13  
 EXPNO 1  
 PROCNO 1  
 Date\_ 20171031  
 Time\_ 00.35  
 INSTRUM spect  
 PROBHD 5 mm PABBO BB-  
 PULPROG zgpg30  
 TD 65536  
 SOLVENT CDCl3  
 NS 636  
 DS 4  
 SWH 39062.500 Hz  
 FIDRES 0.596046 Hz  
 AQ 0.8389108 sec  
 RG 203  
 DW 12.800 usec  
 DE 6.50 usec  
 TE 297.9 K  
 D1 2.00000000 sec  
 D11 0.03000000 sec  
 TD0 1

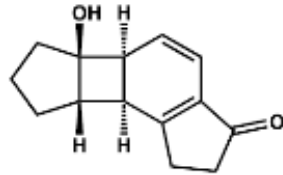

**11**: C<sub>14</sub>H<sub>16</sub>O<sub>2</sub>  
 MW: 216.28

===== CHANNEL f1 =====  
 NUC1 13C  
 P1 9.50 usec  
 PL1 3.00 dB  
 PL1W 59.92485046 W  
 SFO1 150.9178988 MHz

===== CHANNEL f2 =====  
 CPDPRG2 waltz16  
 NUC2 1H  
 PCPD2 80.00 usec  
 PL2 -1.40 dB  
 PL12 14.38 dB  
 PL13 13.70 dB  
 PL2W 16.22728539 W  
 PL12W 0.42879117 W  
 PL13W 0.50147104 W  
 SFO2 600.1324005 MHz  
 SI 32768  
 SF 150.9028090 MHz  
 WDW EM  
 SSB 0  
 LB 1.00 Hz  
 GB 0  
 PC 1.40

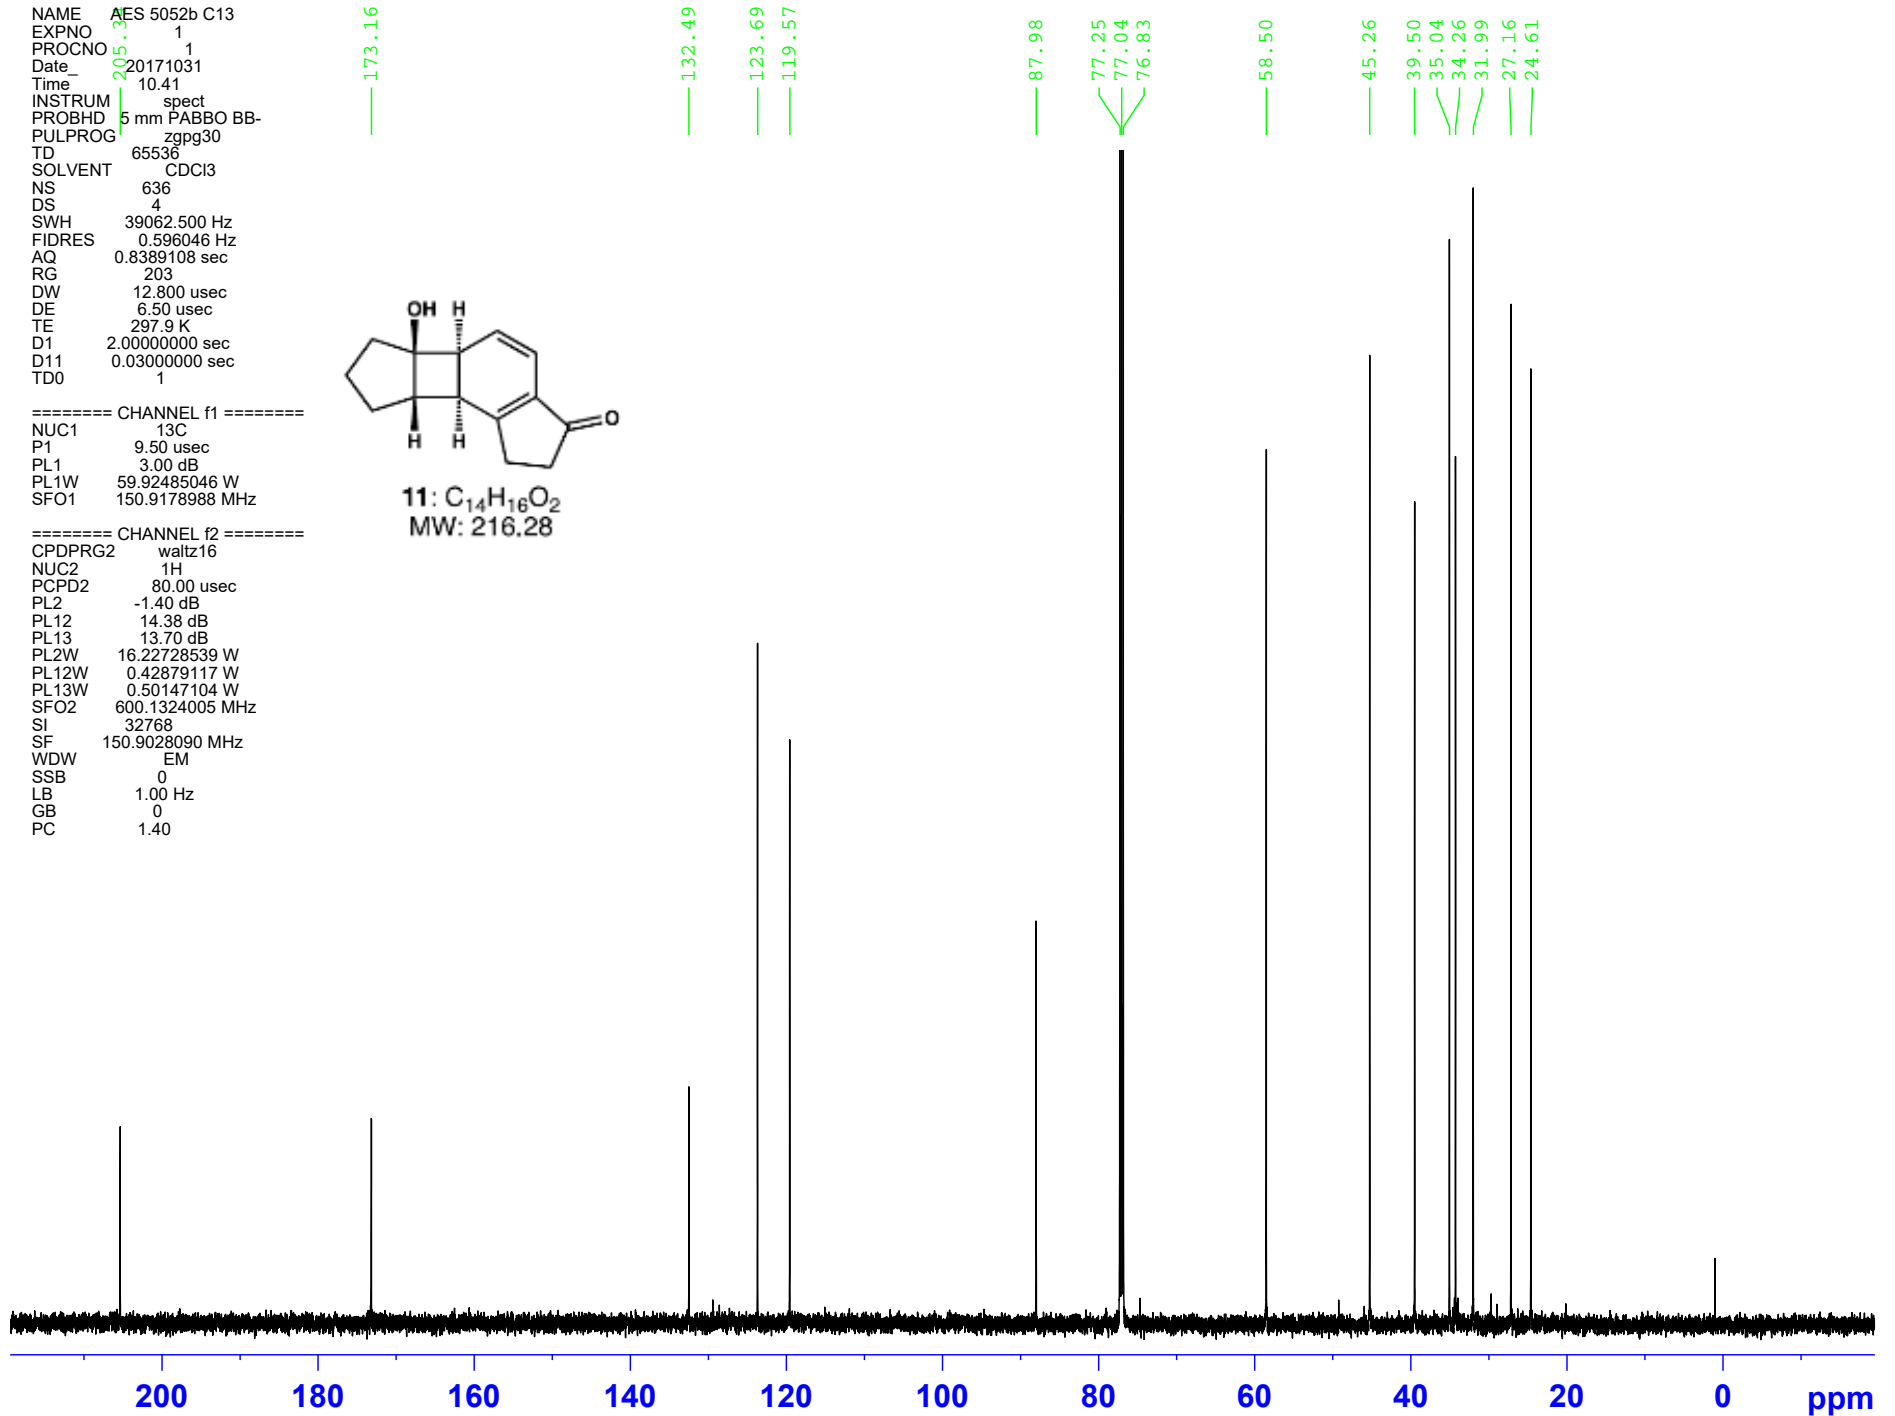

NAME AES 3017 1H  
 EXPNO 1  
 PROCNO 1  
 Date\_ 20160824  
 Time 0.20  
 INSTRUM spect  
 PROBHD 5 mm PABBO BB-  
 PULPROG zg30  
 TD 65536  
 SOLVENT CDCl3  
 NS 16  
 DS 2  
 SWH 8223.685 Hz  
 FIDRES 0.125483 Hz  
 AQ 3.9846387 sec  
 RG 71.8  
 DW 60.800 usec  
 DE 6.50 usec  
 TE 297.9 K  
 D1 1.00000000 sec  
 TD0 1

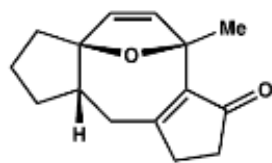

**13a:** C<sub>15</sub>H<sub>18</sub>O<sub>2</sub>  
 MW: 230.31

===== CHANNEL f1 =====  
 NUC1 1H  
 P1 10.00 usec  
 PL1 -2.78 dB  
 PL1W 27.10892296 W  
 SFO1 400.1724712 MHz  
 SI 32768  
 SF 400.1700089 MHz  
 WDW EM  
 SSB 0  
 LB 0.30 Hz  
 GB 0  
 PC 1.00

7.260

5.959  
5.7042.538  
2.461  
2.398  
2.326  
2.284  
2.209  
2.182  
2.115  
1.918  
1.811  
1.789  
1.767  
1.694  
1.306  
1.224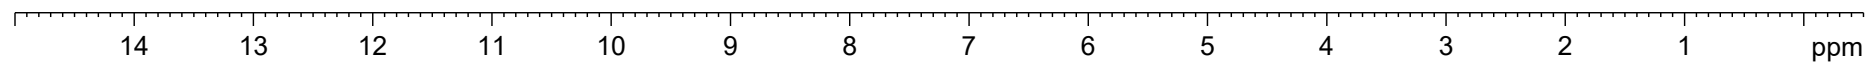1.00  
0.982.95  
1.09  
1.09  
2.03  
3.79  
3.48  
1.20  
1.17

NAME AES 3017 C13  
 EXPNO 1  
 PROCNO 1  
 Date\_ 20160824  
 Time\_ 20:16:44  
 INSTRUM spect  
 PROBHD 5 mm PABBO BB-  
 PULPROG zgpg30  
 TD 65536  
 SOLVENT CDCl3  
 NS 512  
 DS 4  
 SWH 24038.461 Hz  
 FIDRES 0.366798 Hz  
 AQ 1.3631988 sec  
 RG 203  
 DW 20.800 usec  
 DE 6.50 usec  
 TE 298.1 K  
 D1 2.00000000 sec  
 D11 0.03000000 sec  
 TD0 1

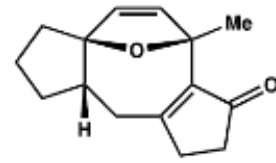

===== CHANNEL f1 =====  
 NUC1 13C  
 P1 10.00 usec  
 PL1 -1.78 dB  
 PL1W 47.30532455 W  
 SFO1 100.6328888 MHz

===== CHANNEL f2 =====  
 CPDPRG2 waltz16  
 NUC2 1H  
 PCPD2 80.00 usec  
 PL2 -2.78 dB  
 PL12 15.28 dB  
 PL13 18.00 dB  
 PL2W 27.10892296 W  
 PL12W 0.42375252 W  
 PL13W 0.22652298 W  
 SFO2 400.1716007 MHz  
 SI 32768  
 SF 100.6228270 MHz  
 WDW EM  
 SSB 0  
 LB 1.00 Hz  
 GB 0  
 PC 1.40

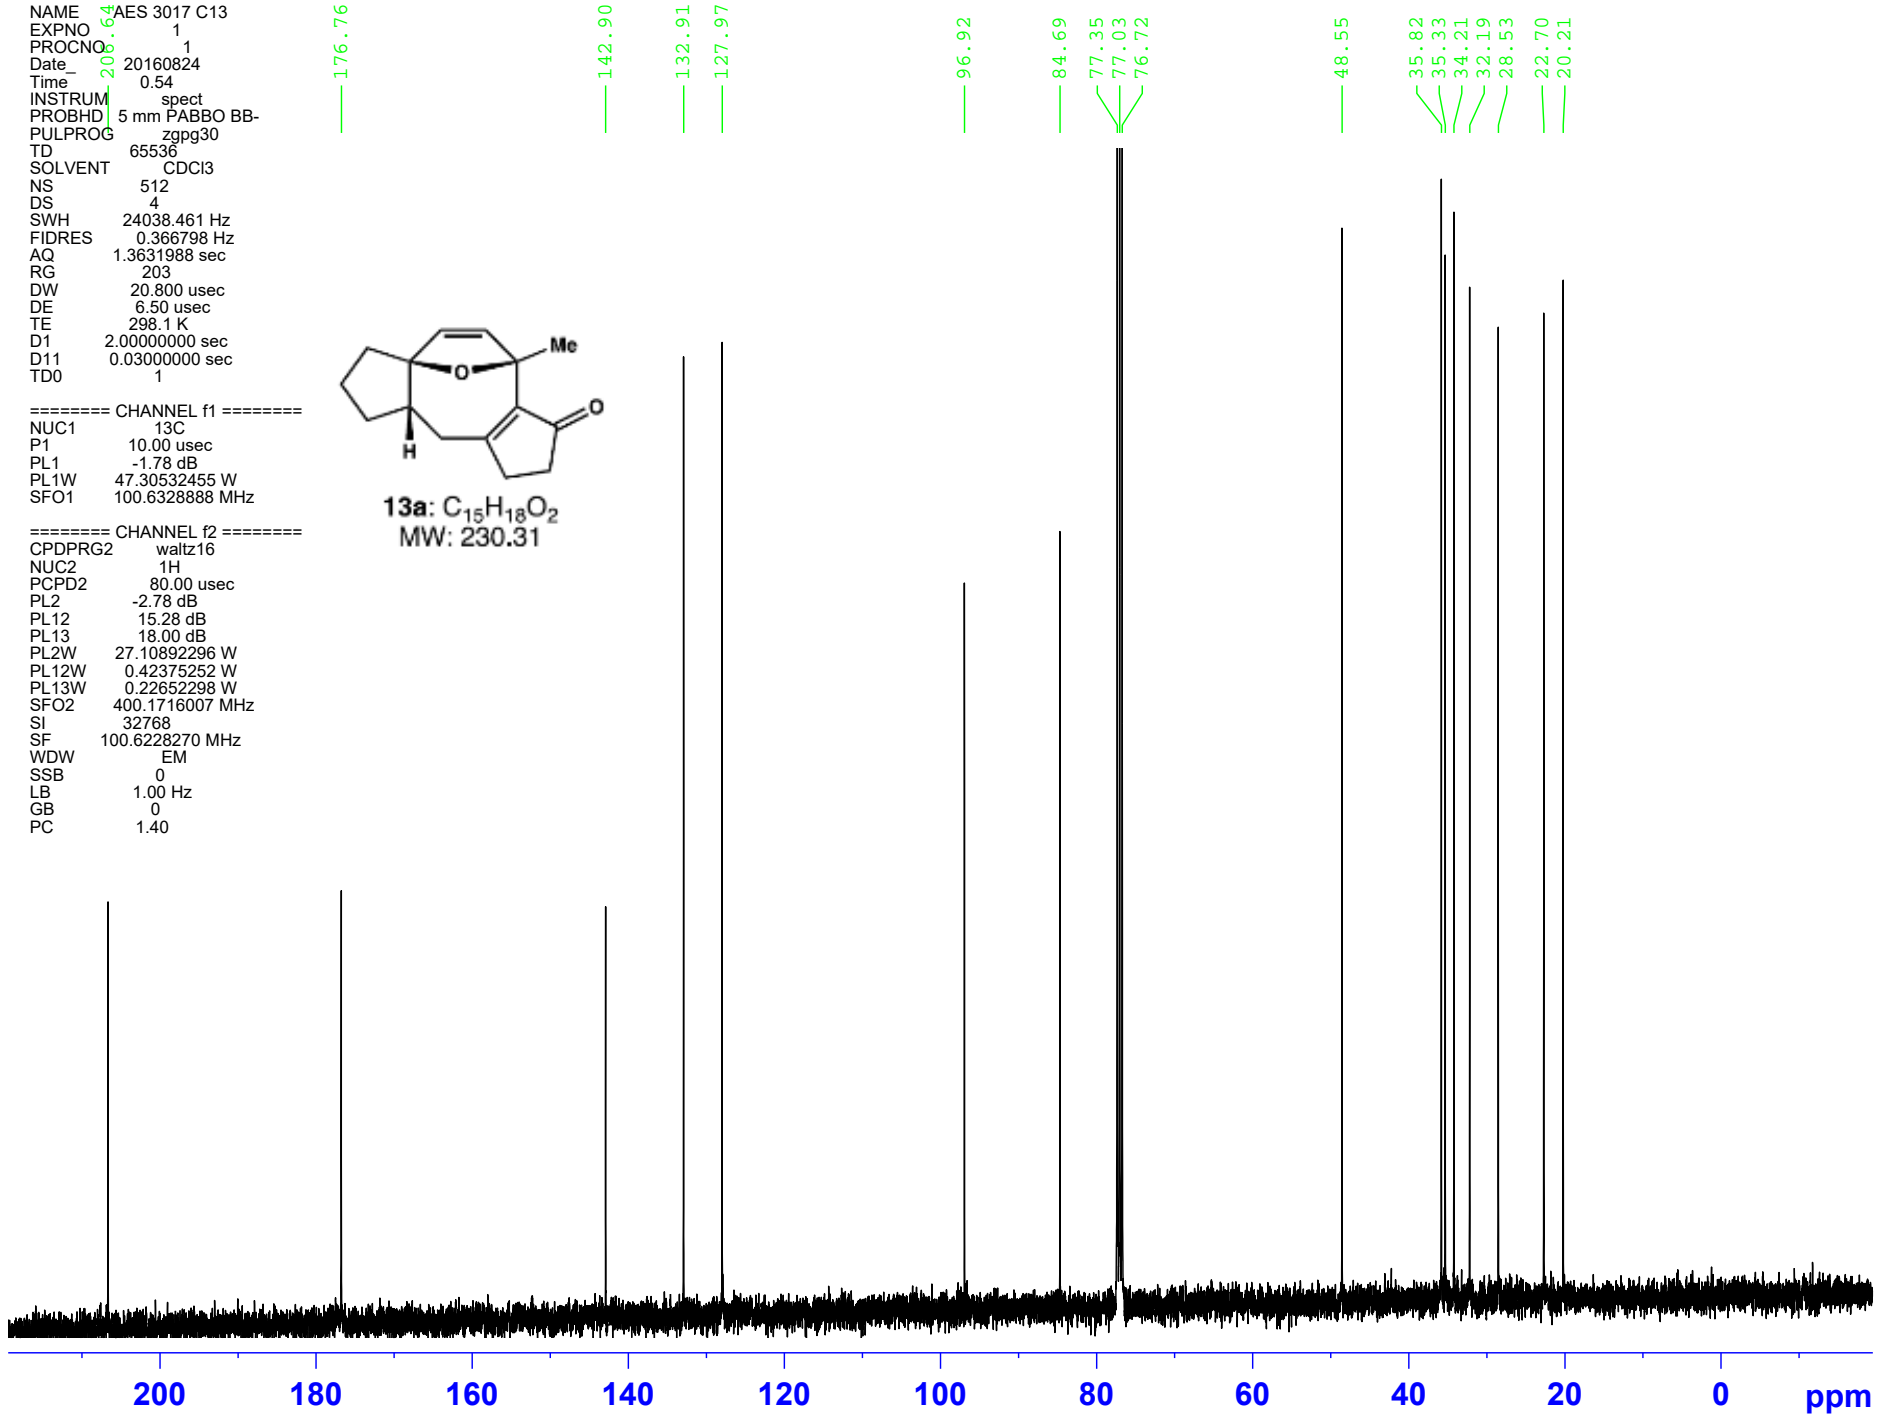

NAME AES 3293a  
 EXPNO 1  
 PROCNO 1  
 Date\_ 20170407  
 Time 20.51  
 INSTRUM spect  
 PROBHD 5 mm PABBO BB-  
 PULPROG zg30  
 TD 65536  
 SOLVENT CDCl3  
 NS 8  
 DS 2  
 SWH 8223.685 Hz  
 FIDRES 0.125483 Hz  
 AQ 3.9846387 sec  
 RG 144  
 DW 60.800 usec  
 DE 6.50 usec  
 TE 292.9 K  
 D1 1.00000000 sec  
 TD0 1

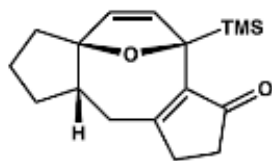

===== CHANNEL f1 =====  
 NUC1 1H  
 P1 10.00 usec  
 PL1 -2.78 dB  
 PL1W 27.10892296 W  
 SFO1 400.1724712 MHz  
 SI 32768  
 SF 400.1700087 MHz  
 WDW EM  
 SSB 0  
 LB 0.30 Hz  
 GB 0  
 PC 1.00

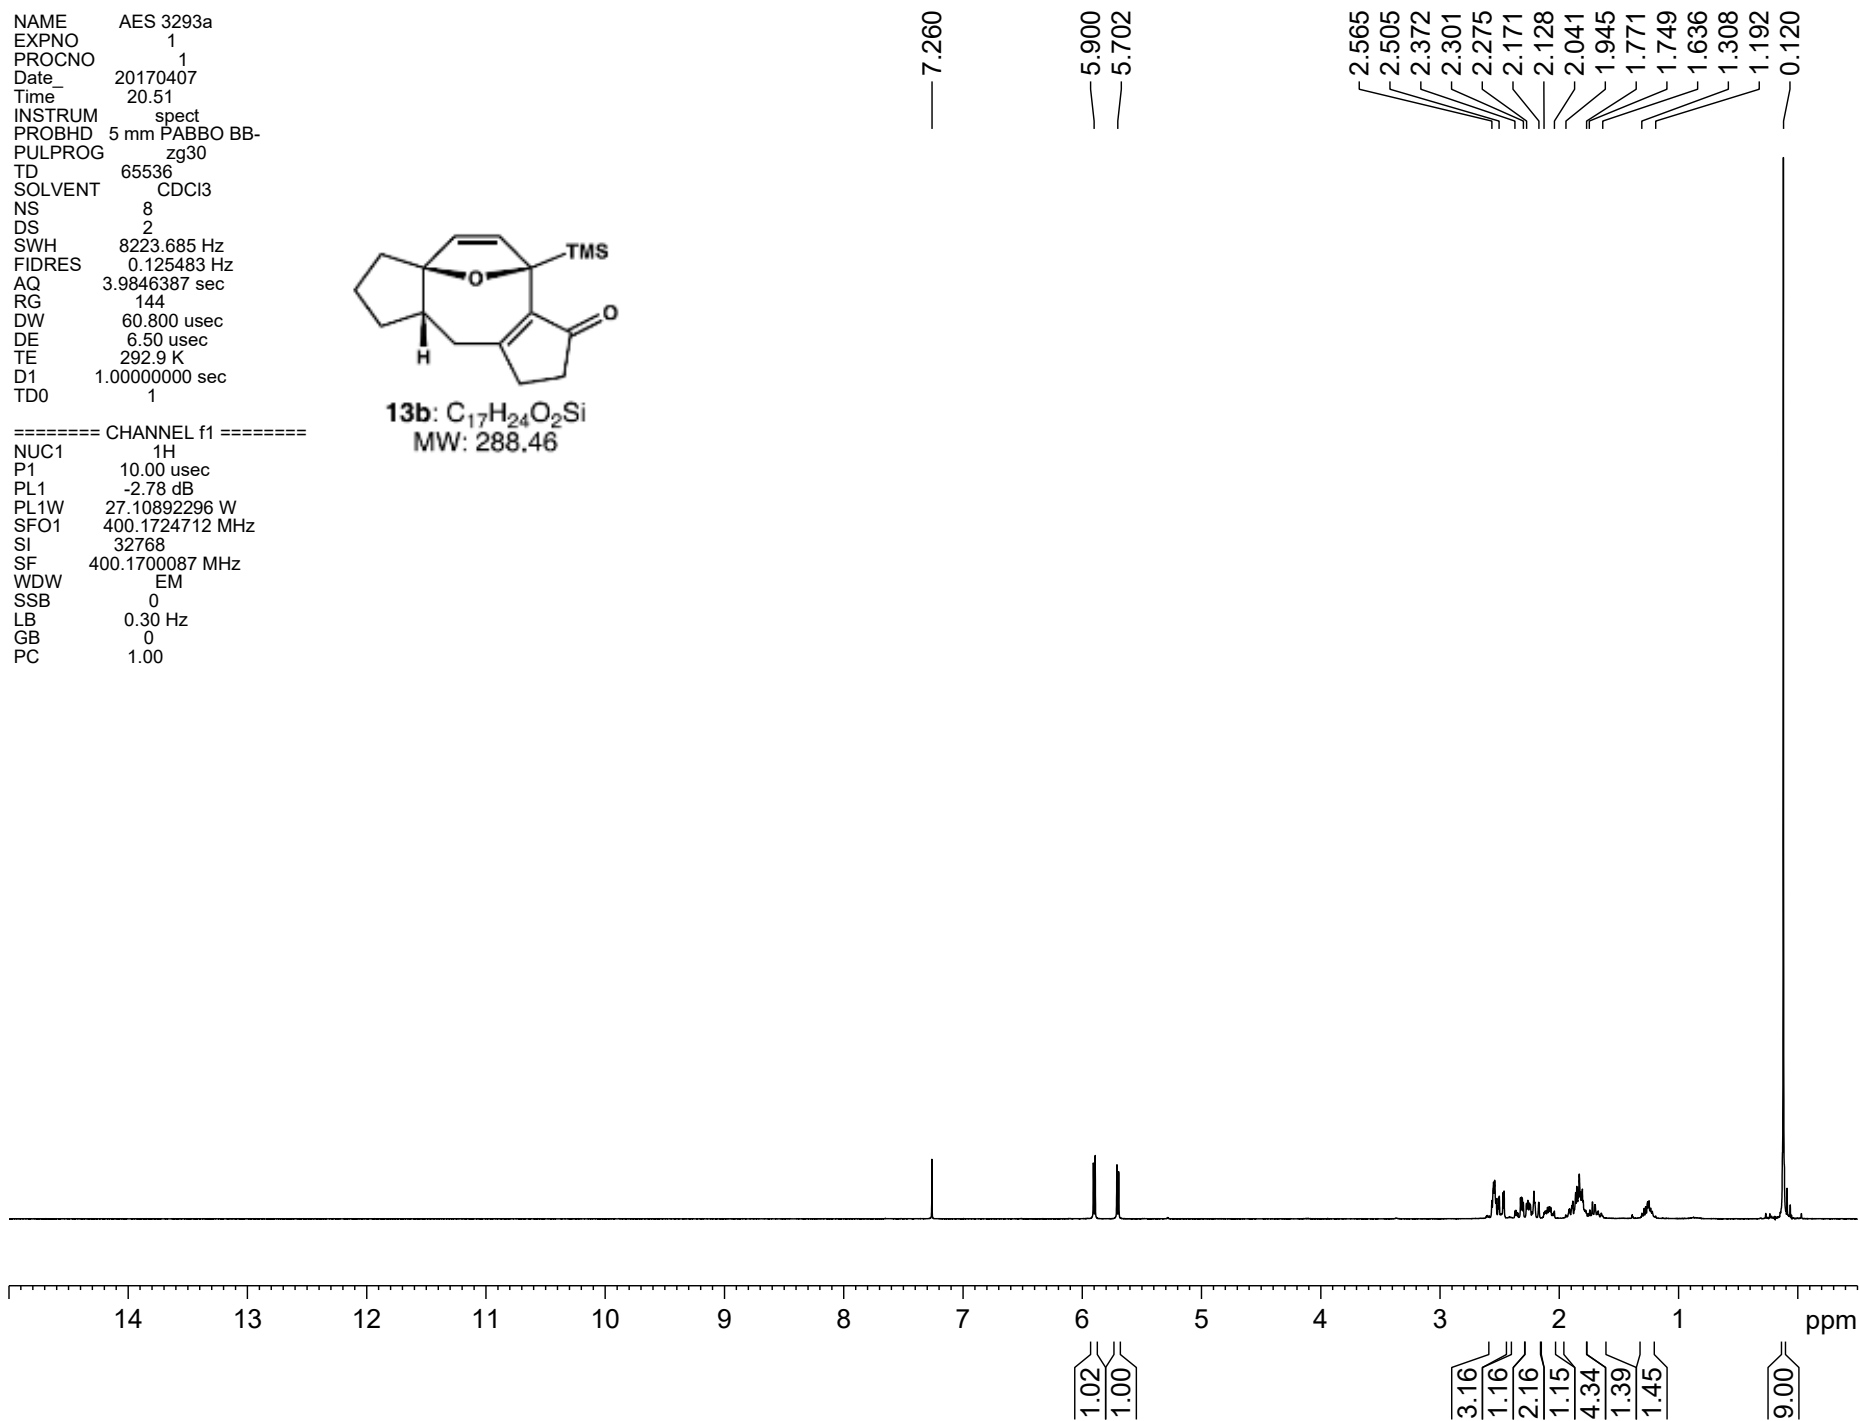



NAME AES 3293a C13  
 EXPNO 1  
 PROCNO 1  
 Date\_ 20170407  
 Time 22.03  
 INSTRUM spect  
 PROBHD 5 mm PABBO BB-  
 PULPROG zgpg30  
 TD 65536  
 SOLVENT CDCl3  
 NS 256  
 DS 4  
 SWH 24038.461 Hz  
 FIDRES 0.366798 Hz  
 AQ 1.3631988 sec  
 RG 203  
 DW 20.800 usec  
 DE 6.50 usec  
 TE 294.0 K  
 D1 2.00000000 sec  
 D11 0.03000000 sec  
 TD0 1

===== CHANNEL f1 =====  
 NUC1 13C  
 P1 10.00 usec  
 PL1 -1.78 dB  
 PL1W 47.30532455 W  
 SFO1 100.6328888 MHz

===== CHANNEL f2 =====  
 CPDPRG2 waltz16  
 NUC2 1H  
 PCPD2 80.00 usec  
 PL2 -2.78 dB  
 PL12 15.28 dB  
 PL13 18.00 dB  
 PL2W 27.10892296 W  
 PL12W 0.42375252 W  
 PL13W 0.22652298 W  
 SFO2 400.1716007 MHz  
 SI 32768  
 SF 100.6228270 MHz  
 WDW EM  
 SSB 0  
 LB 1.00 Hz  
 GB 0  
 PC 1.40

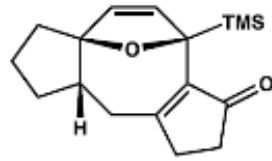

**13b:** C<sub>17</sub>H<sub>24</sub>O<sub>2</sub>Si  
 MW: 288.46

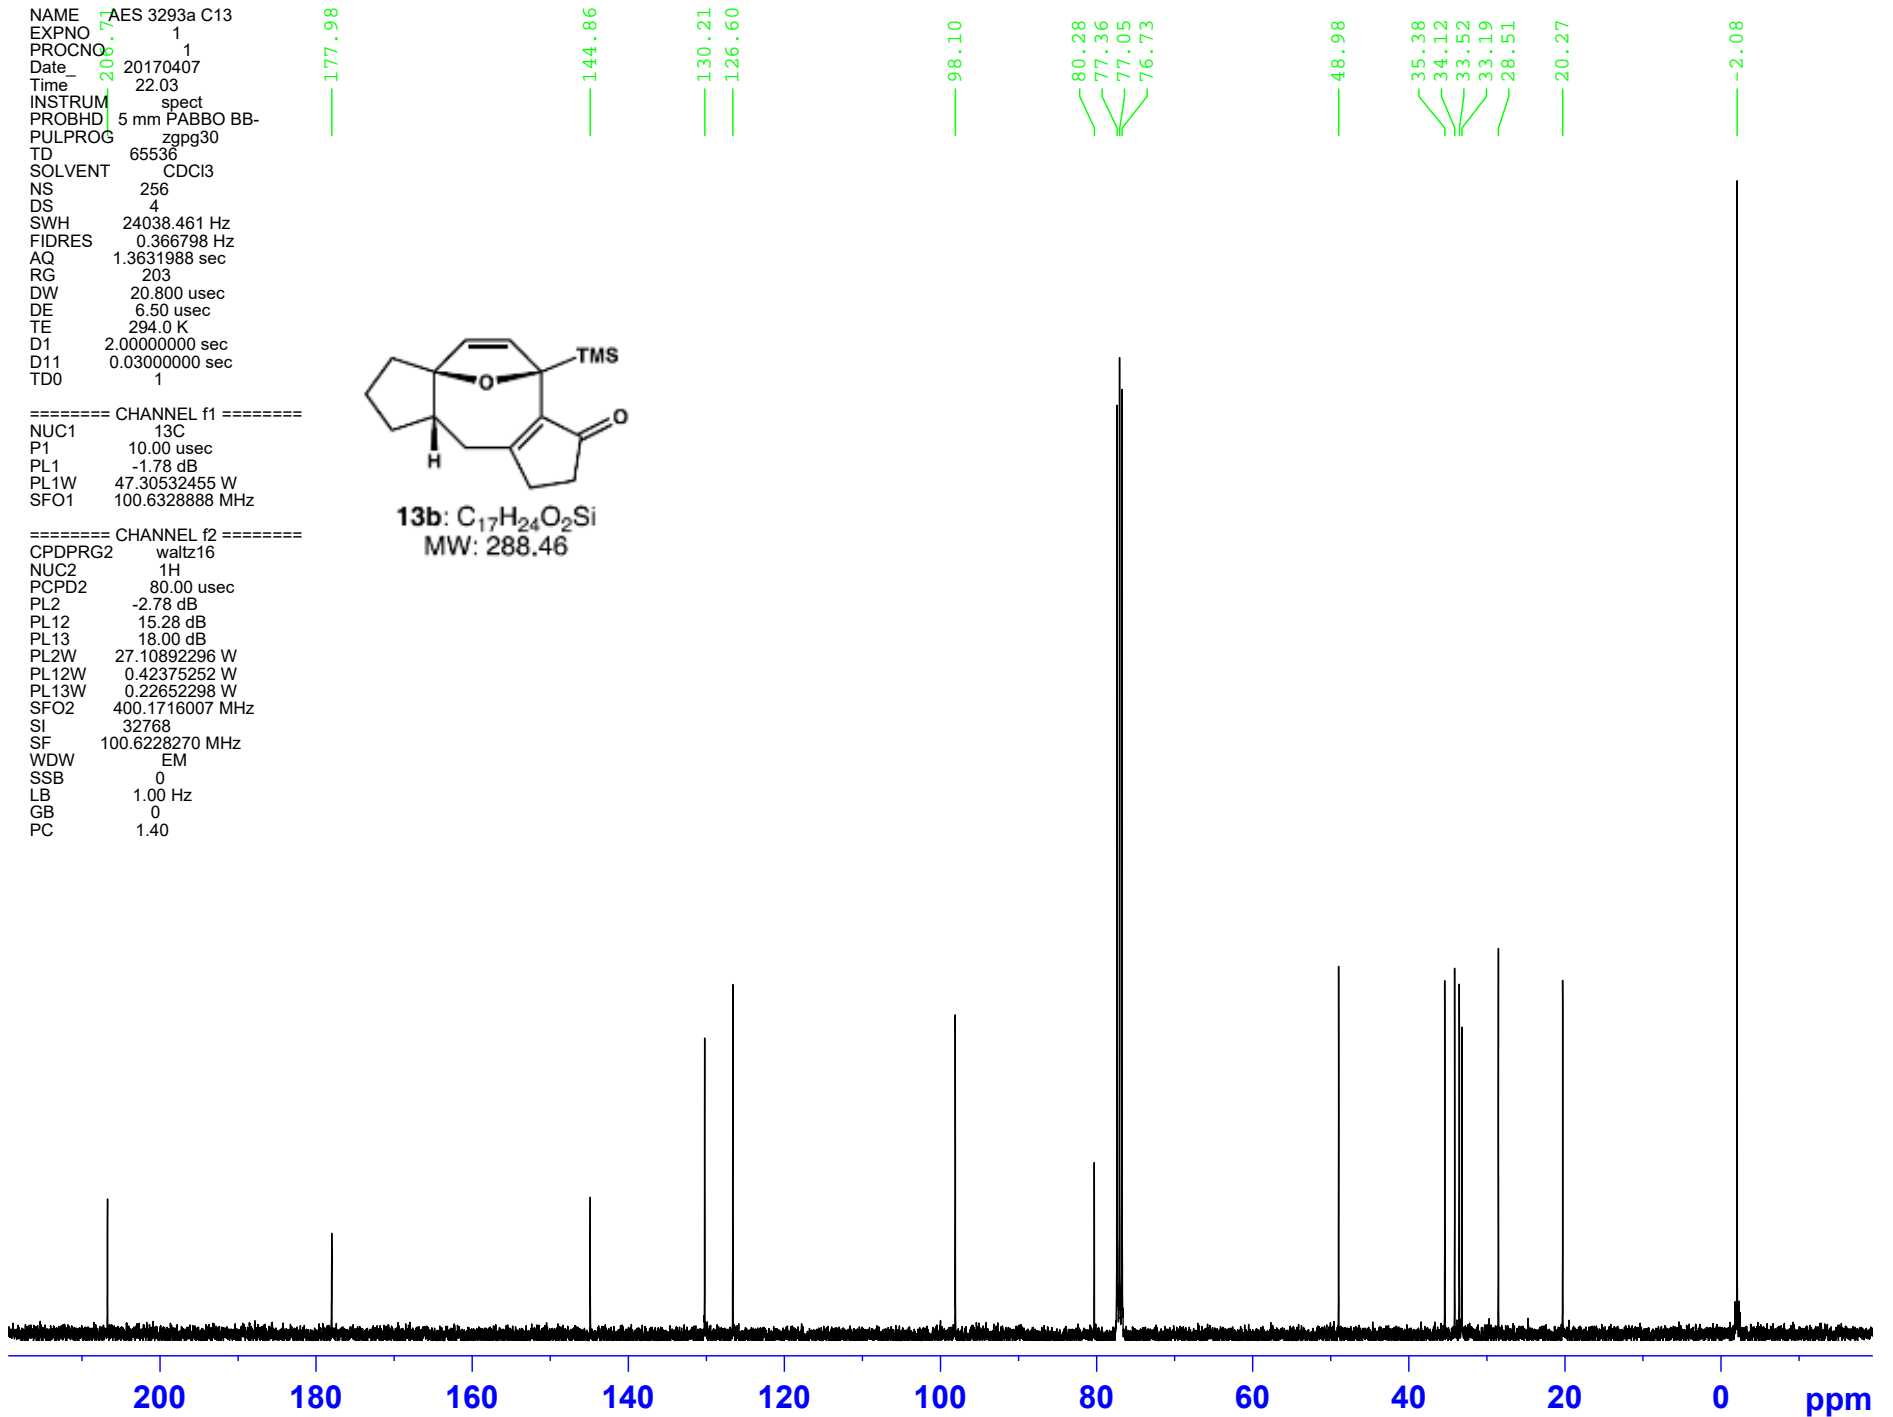

NAME AES 3300b 1H  
 EXPNO 1  
 PROCNO 1  
 Date\_ 20170412  
 Time 22.50  
 INSTRUM spect  
 PROBHD 5 mm PABBO BB-  
 PULPROG zg30  
 TD 65536  
 SOLVENT CDCl3  
 NS 3  
 DS 2  
 SWH 8223.685 Hz  
 FIDRES 0.125483 Hz  
 AQ 3.9846387 sec  
 RG 114  
 DW 60.800 usec  
 DE 6.50 usec  
 TE 293.3 K  
 D1 1.00000000 sec  
 TD0 1

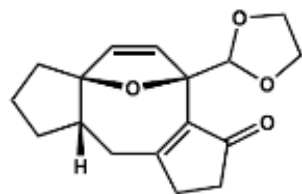

**13c:** C<sub>17</sub>H<sub>20</sub>O<sub>4</sub>  
 MW: 288.34

===== CHANNEL f1 =====  
 NUC1 1H  
 P1 10.00 usec  
 PL1 -2.78 dB  
 PL1W 27.10892296 W  
 SFO1 400.1724712 MHz  
 SI 32768  
 SF 400.1700091 MHz  
 WDW EM  
 SSB 0  
 LB 0.30 Hz  
 GB 0  
 PC 1.00

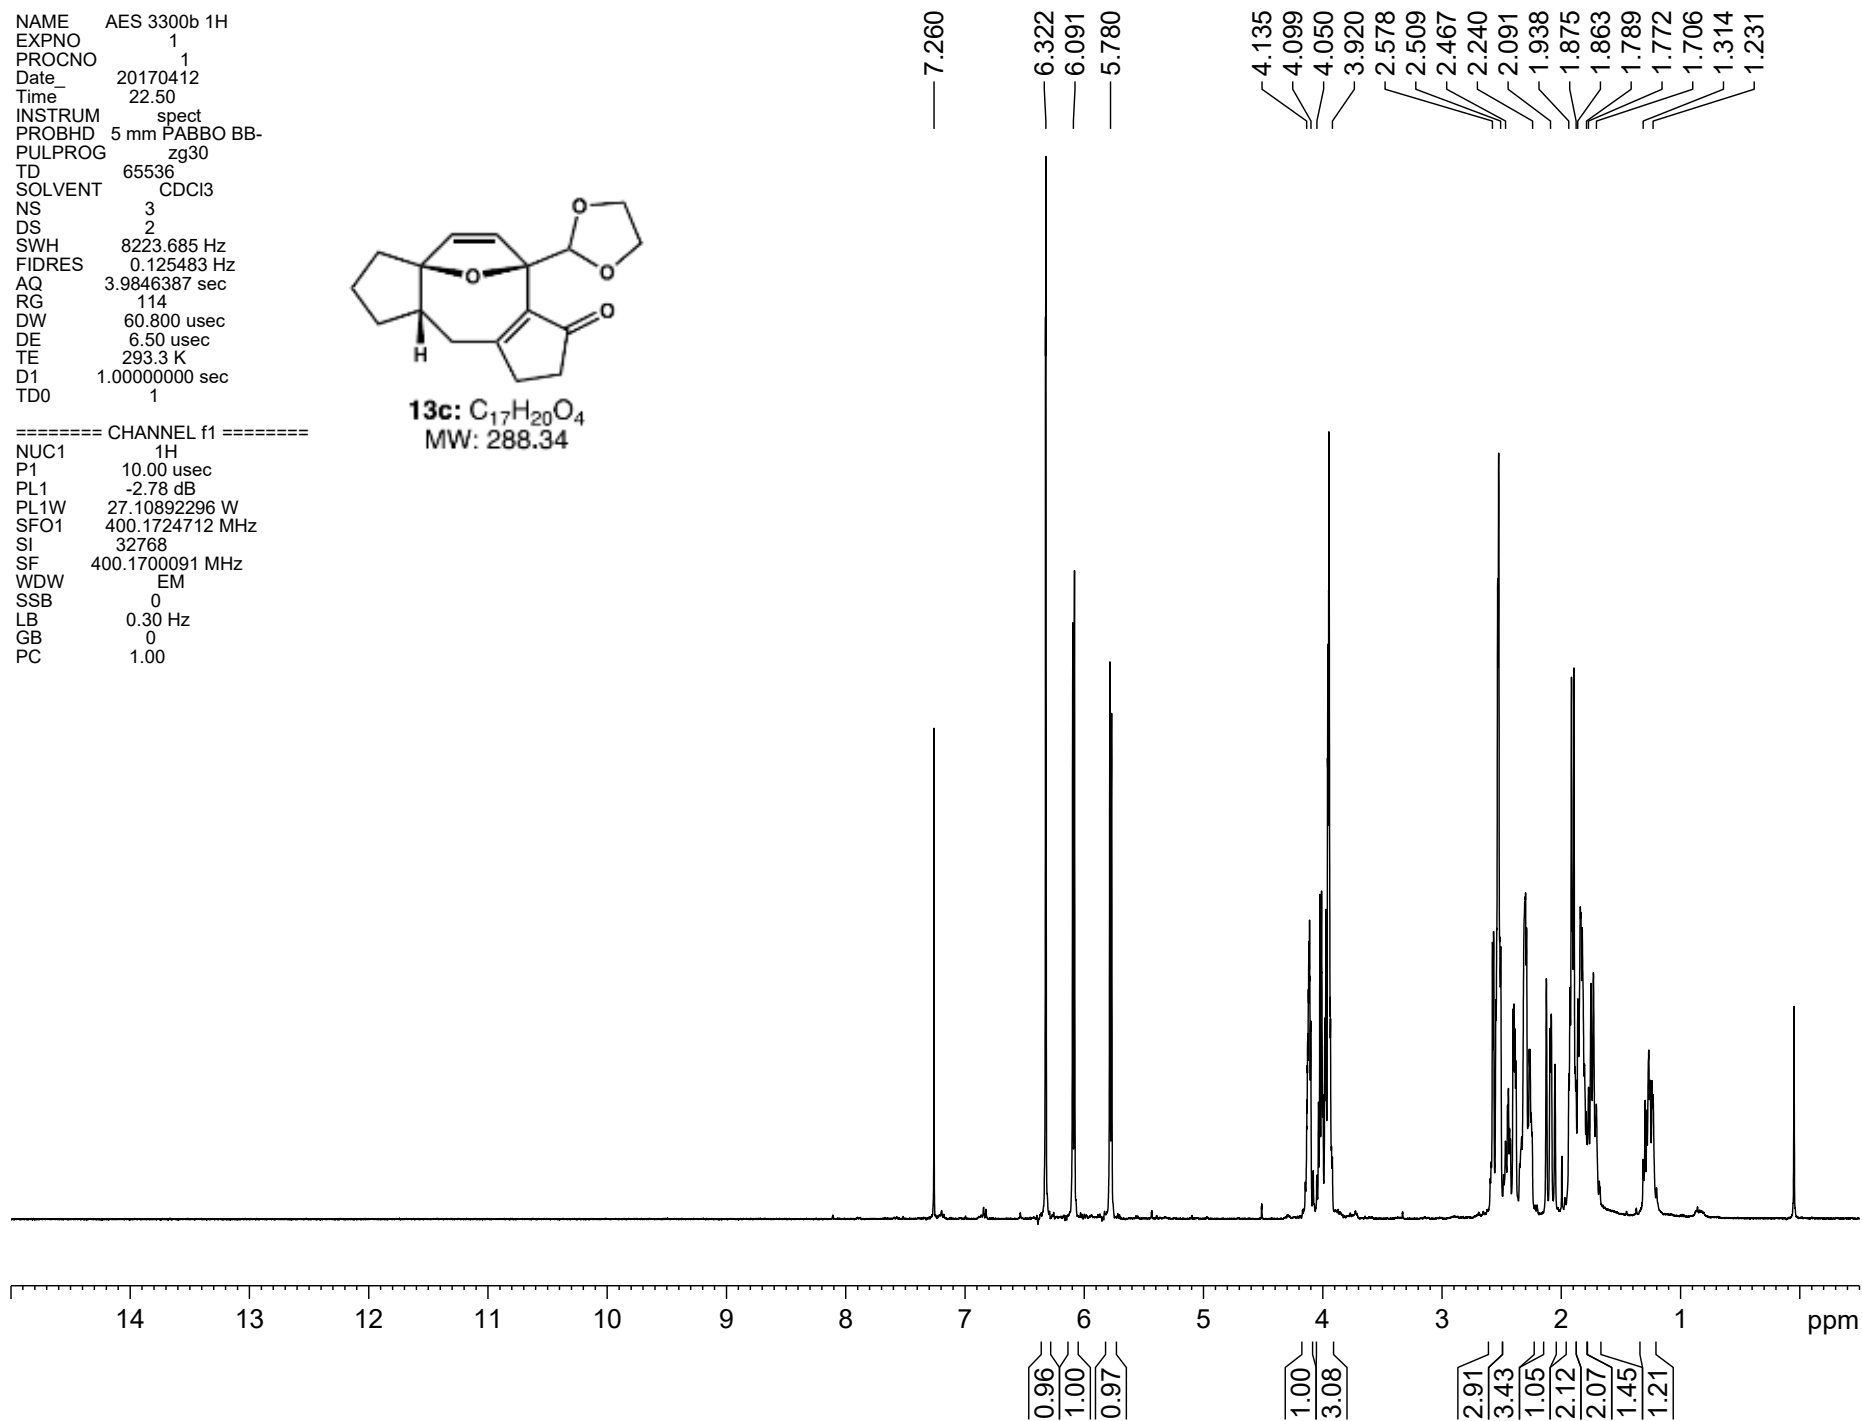

NAME AES 3300b C13  
 EXPNO 2  
 PROCNO 1  
 Date\_ 20170414  
 Time 23.04  
 INSTRUM spect  
 PROBHD 5 mm PABBO BB-  
 PULPROG zgpg30  
 TD 65536  
 SOLVENT CDCl3  
 NS 1024  
 DS 4  
 SWH 36057.691 Hz  
 FIDRES 0.550197 Hz  
 AQ 0.9088159 sec  
 RG 203  
 DW 13.867 usec  
 DE 6.50 usec  
 TE 298.0 K  
 D1 2.00000000 sec  
 D11 0.03000000 sec  
 TD0 1

===== CHANNEL f1 =====  
 NUC1 13C  
 P1 9.50 usec  
 PL1 3.00 dB  
 PL1W 59.92485046 W  
 SFO1 150.9178988 MHz

===== CHANNEL f2 =====  
 CPDPRG2 waltz16  
 NUC2 1H  
 PCPD2 80.00 usec  
 PL2 -1.40 dB  
 PL12 13.74 dB  
 PL13 13.70 dB  
 PL2W 16.22728539 W  
 PL12W 0.49687356 W  
 PL13W 0.50147104 W  
 SFO2 600.1324005 MHz  
 SI 32768  
 SF 150.9028090 MHz  
 WDW EM  
 SSB 0  
 LB 1.00 Hz  
 GB 0  
 PC 1.40

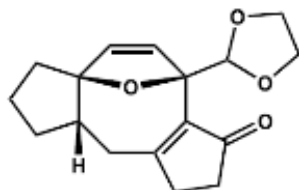

**13c: C<sub>17</sub>H<sub>20</sub>O<sub>4</sub>**  
**MW: 288.34**

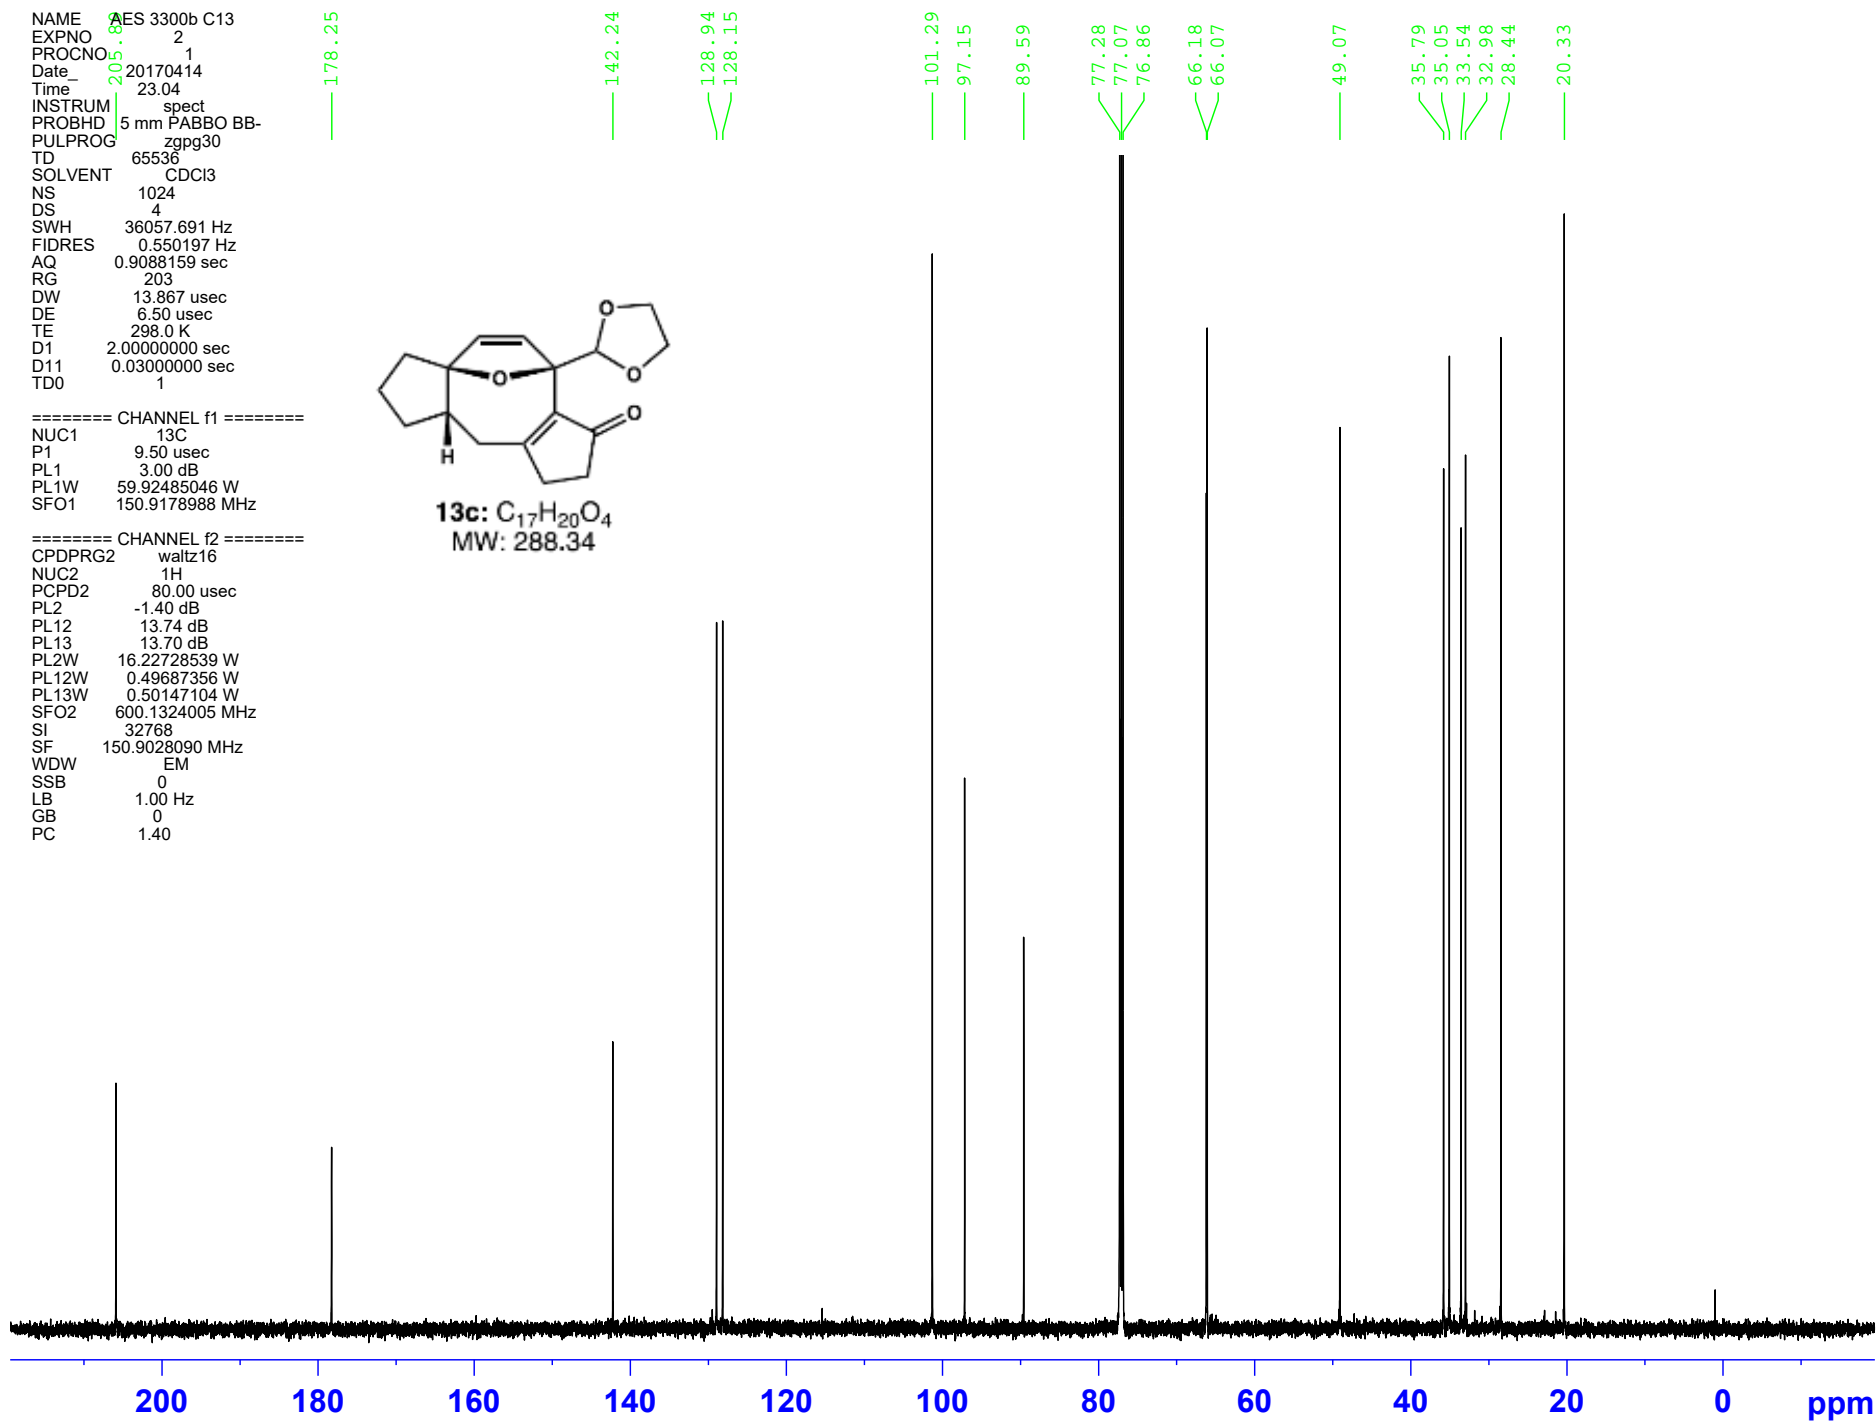

NAME AES 3007 1H  
 EXPNO 1  
 PROCNO 1  
 Date\_ 20160816  
 Time 1.33  
 INSTRUM spect  
 PROBHD 5 mm PABBO BB-  
 PULPROG zg30  
 TD 65536  
 SOLVENT CDCl3  
 NS 16  
 DS 2  
 SWH 8223.685 Hz  
 FIDRES 0.125483 Hz  
 AQ 3.9846387 sec  
 RG 203  
 DW 60.800 usec  
 DE 6.50 usec  
 TE 295.3 K  
 D1 1.00000000 sec  
 TD0 1

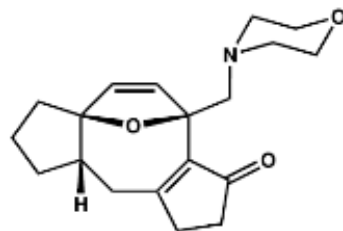

**13d: C<sub>19</sub>H<sub>25</sub>NO<sub>3</sub>**  
 MW: 315.41

===== CHANNEL f1 =====  
 NUC1 1H  
 P1 10.00 usec  
 PL1 -2.78 dB  
 PL1W 27.10892296 W  
 SFO1 400.1724712 MHz  
 SI 32768  
 SF 400.1700091 MHz  
 WDW EM  
 SSB 0  
 LB 0.30 Hz  
 GB 0  
 PC 1.00

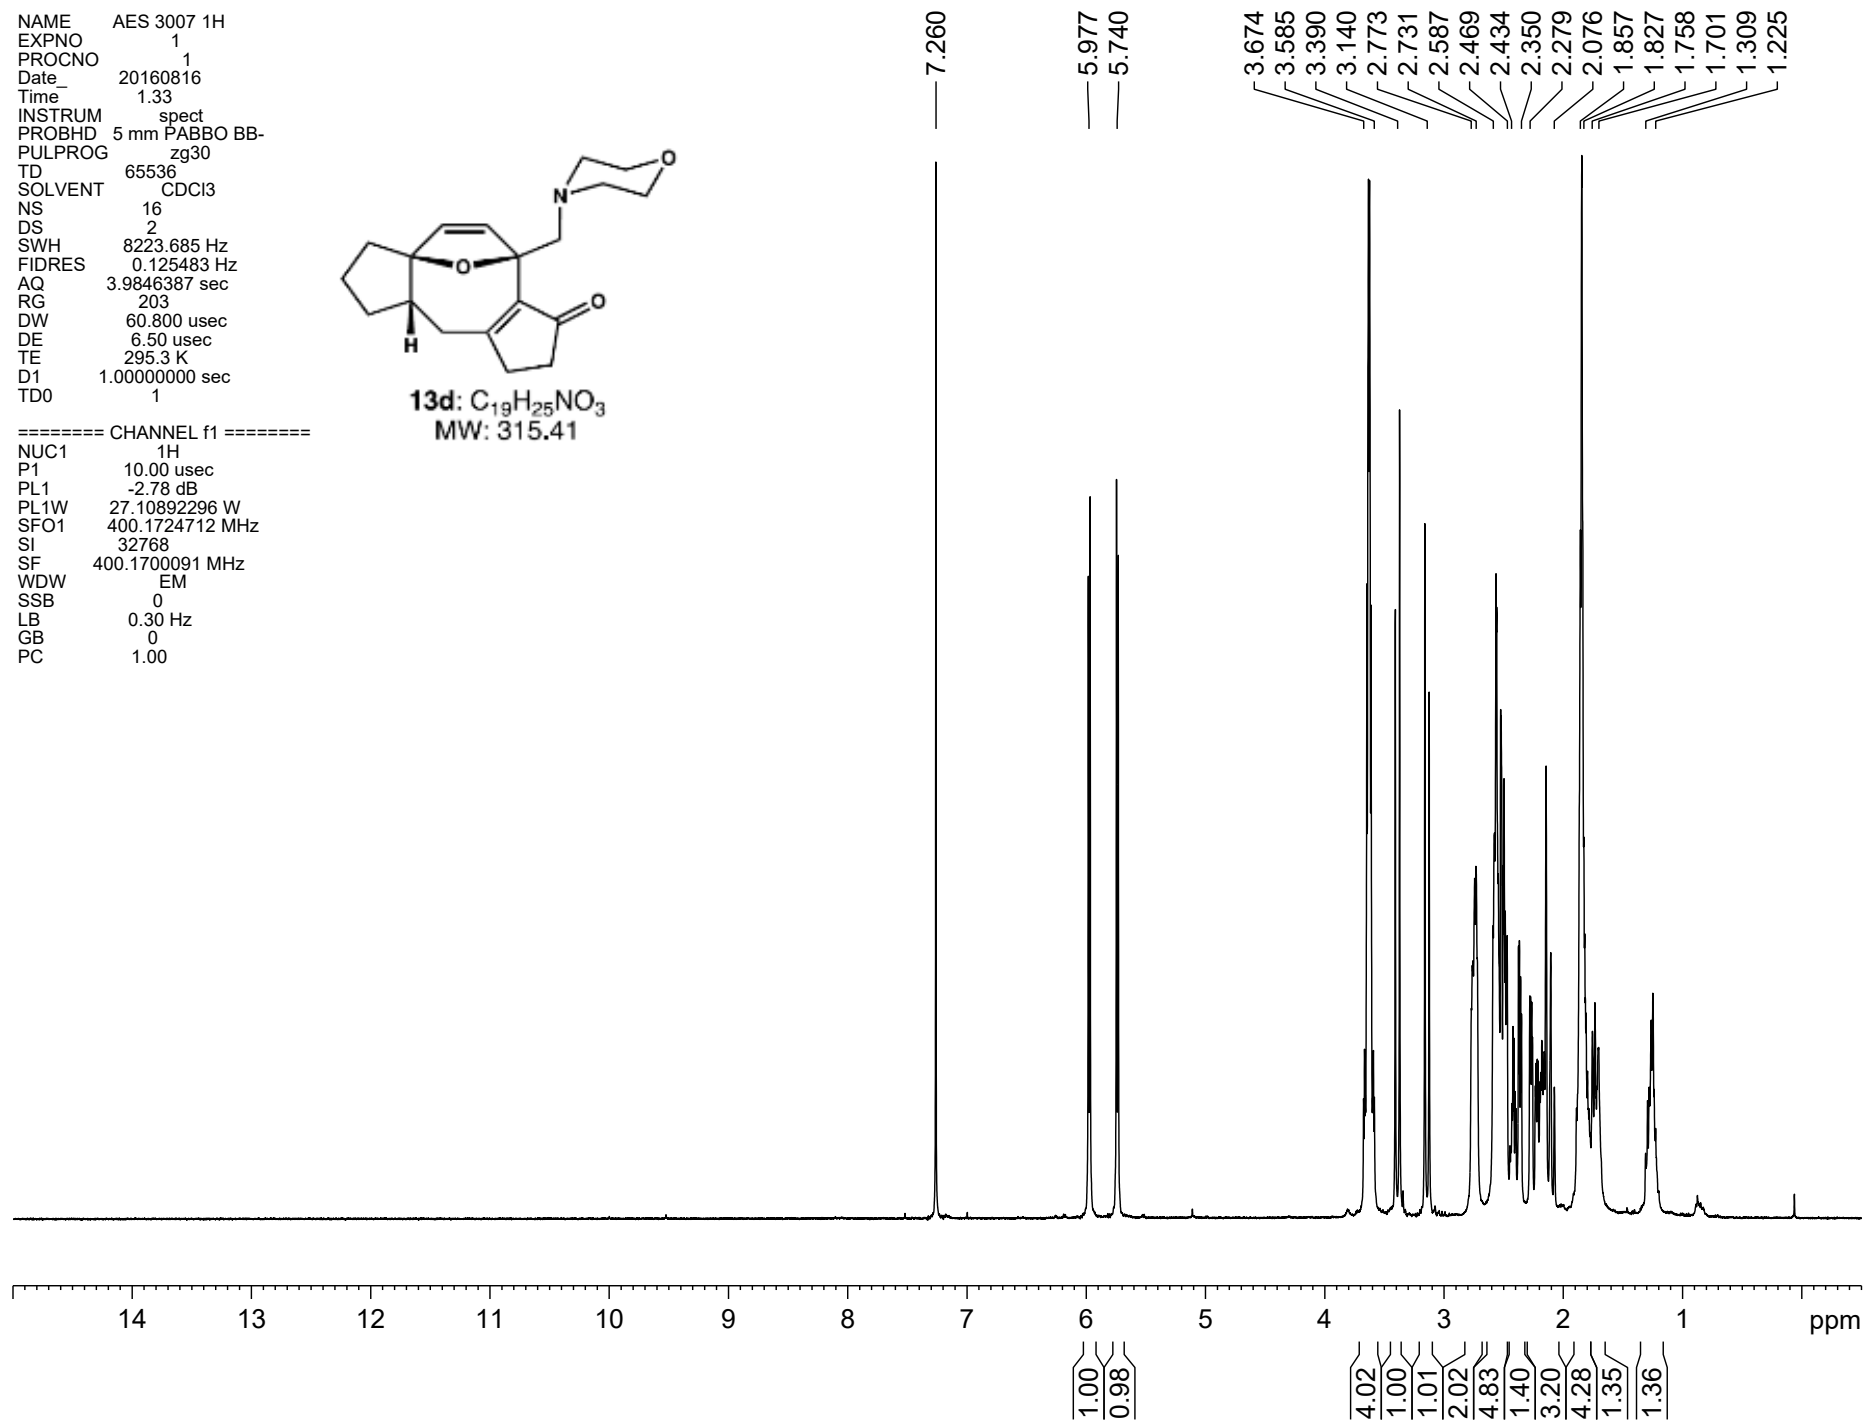

NAME AES 3007 C13  
 EXPNO 1  
 PROCNO 1  
 Date\_ 20160816  
 Time\_ 20.06.39  
 INSTRUM spect  
 PROBHD 5 mm PABBO BB-  
 PULPROG zgpg30  
 TD 65536  
 SOLVENT CDCl3  
 NS 256  
 DS 4  
 SWH 24038.461 Hz  
 FIDRES 0.366798 Hz  
 AQ 1.3631988 sec  
 RG 203  
 DW 20.800 usec  
 DE 6.50 usec  
 TE 296.4 K  
 D1 2.00000000 sec  
 D11 0.03000000 sec  
 TD0 1

176.84

143.23

131.20

127.78

96.89

89.52

77.41

77.09

76.77

67.22

60.02

55.36

48.89

36.04

35.32

33.80

32.45

28.36

20.33

===== CHANNEL f1 =====  
 NUC1 13C  
 P1 10.00 usec  
 PL1 -1.78 dB  
 PL1W 47.30532455 W  
 SFO1 100.6328888 MHz

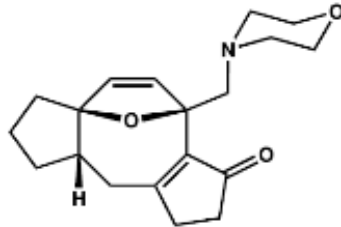

**13d**: C<sub>19</sub>H<sub>25</sub>NO<sub>3</sub>  
 MW: 315.41

===== CHANNEL f2 =====  
 CPDPRG2 waltz16  
 NUC2 1H  
 PCPD2 80.00 usec  
 PL2 -2.78 dB  
 PL12 15.28 dB  
 PL13 18.00 dB  
 PL2W 27.10892296 W  
 PL12W 0.42375252 W  
 PL13W 0.22652298 W  
 SFO2 400.1716007 MHz  
 SI 32768  
 SF 100.6228270 MHz  
 WDW EM  
 SSB 0  
 LB 1.00 Hz  
 GB 0  
 PC 1.40

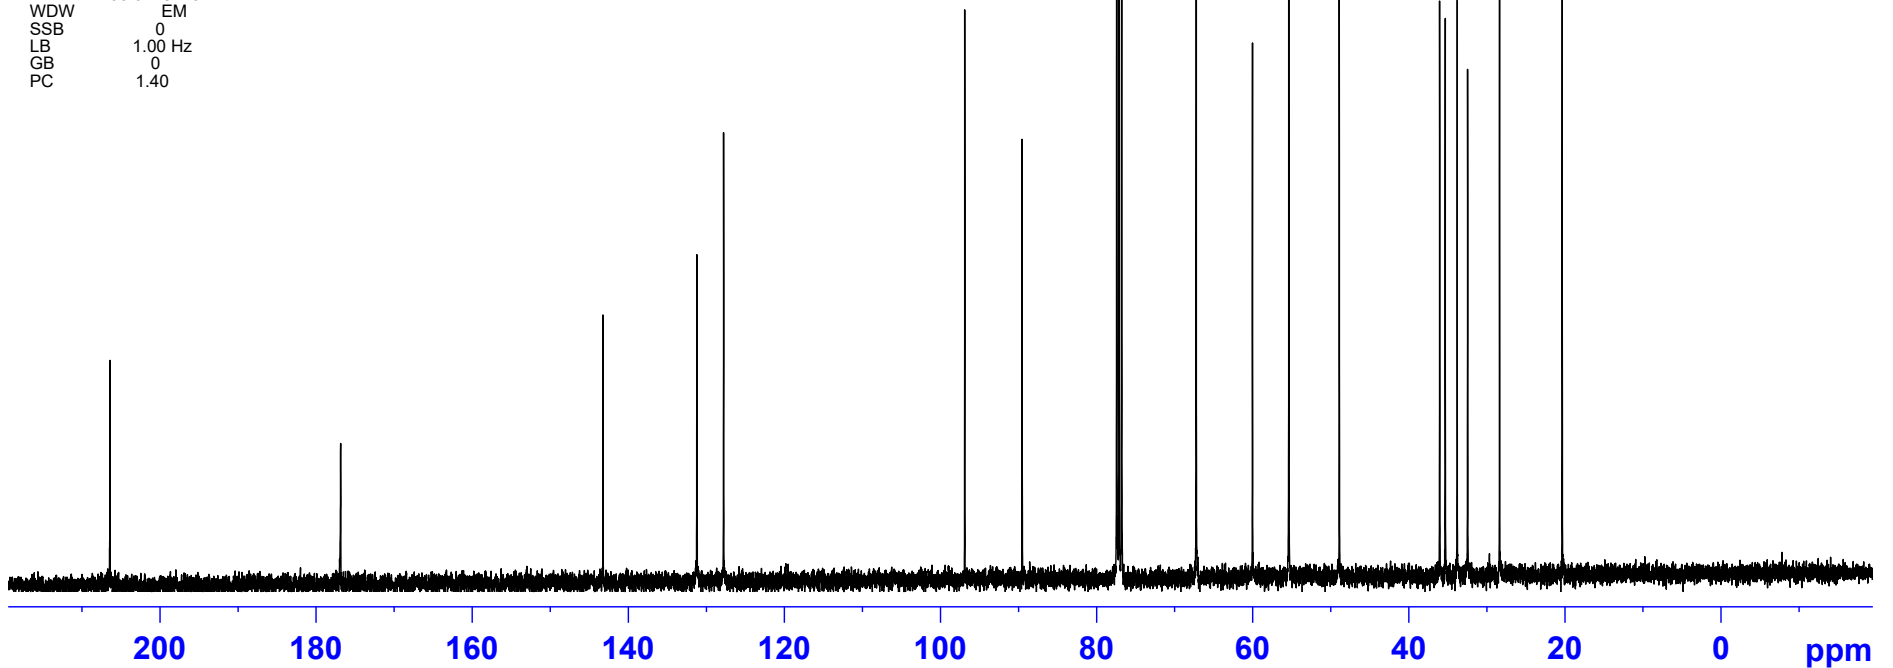

NAME AES 4003b  
 EXPNO 1  
 PROCNO 1  
 Date\_ 20170413  
 Time 17.11  
 INSTRUM spect  
 PROBHD 5 mm PABBO BB-  
 PULPROG zg30  
 TD 65536  
 SOLVENT CDCl3  
 NS 8  
 DS 2  
 SWH 8223.685 Hz  
 FIDRES 0.125483 Hz  
 AQ 3.9846387 sec  
 RG 64  
 DW 60.800 usec  
 DE 6.50 usec  
 TE 293.3 K  
 D1 1.00000000 sec  
 TD0 1

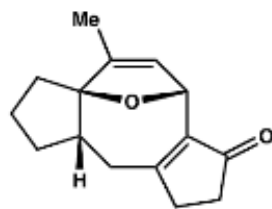

**13e**: C<sub>15</sub>H<sub>18</sub>O<sub>2</sub>  
 MW: 230.31

===== CHANNEL f1 =====  
 NUC1 1H  
 P1 10.00 usec  
 PL1 -2.78 dB  
 PL1W 27.10892296 W  
 SFO1 400.1724712 MHz  
 SI 32768  
 SF 400.1700093 MHz  
 WDW EM  
 SSB 0  
 LB 0.30 Hz  
 GB 0  
 PC 1.00

7.260

5.564

5.253

2.536  
 2.476  
 2.410  
 2.183  
 2.061  
 2.000  
 1.911  
 1.866  
 1.793  
 1.709  
 1.440  
 1.352

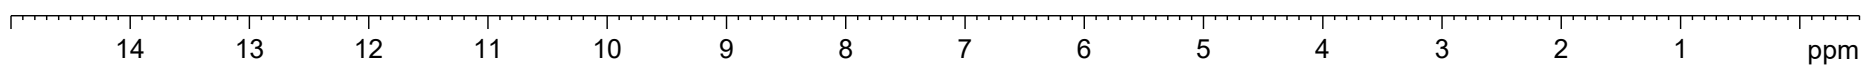

1.00  
 1.02

3.44  
 4.64  
 1.46  
 2.64  
 3.01  
 1.54  
 1.31

NAME AES 4003b C13  
 EXPNO 1  
 PROCNO 1  
 Date\_ 20170414  
 Time 1.03  
 INSTRUM spect  
 PROBHD 5 mm PABBO BB-  
 PULPROG zgpg30  
 TD 65536  
 SOLVENT CDCl3  
 NS 256  
 DS 4  
 SWH 24038.461 Hz  
 FIDRES 0.366798 Hz  
 AQ 1.3631988 sec  
 RG 203  
 DW 20.800 usec  
 DE 6.50 usec  
 TE 294.7 K  
 D1 2.00000000 sec  
 D11 0.03000000 sec  
 TD0 1

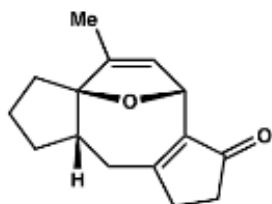

===== CHANNEL f1 =====  
 NUC1 13C  
 P1 10.00 usec  
 PL1 -1.78 dB  
 PL1W 47.30532455 W  
 SFO1 100.6328888 MHz

===== CHANNEL f2 =====  
 CPDPRG2 waltz16  
 NUC2 1H  
 PCPD2 80.00 usec  
 PL2 -2.78 dB  
 PL12 15.28 dB  
 PL13 18.00 dB  
 PL2W 27.10892296 W  
 PL12W 0.42375252 W  
 PL13W 0.22652298 W  
 SFO2 400.1716007 MHz  
 SI 32768  
 SF 100.6228270 MHz  
 WDW EM  
 SSB 0  
 LB 1.00 Hz  
 GB 0  
 PC 1.40

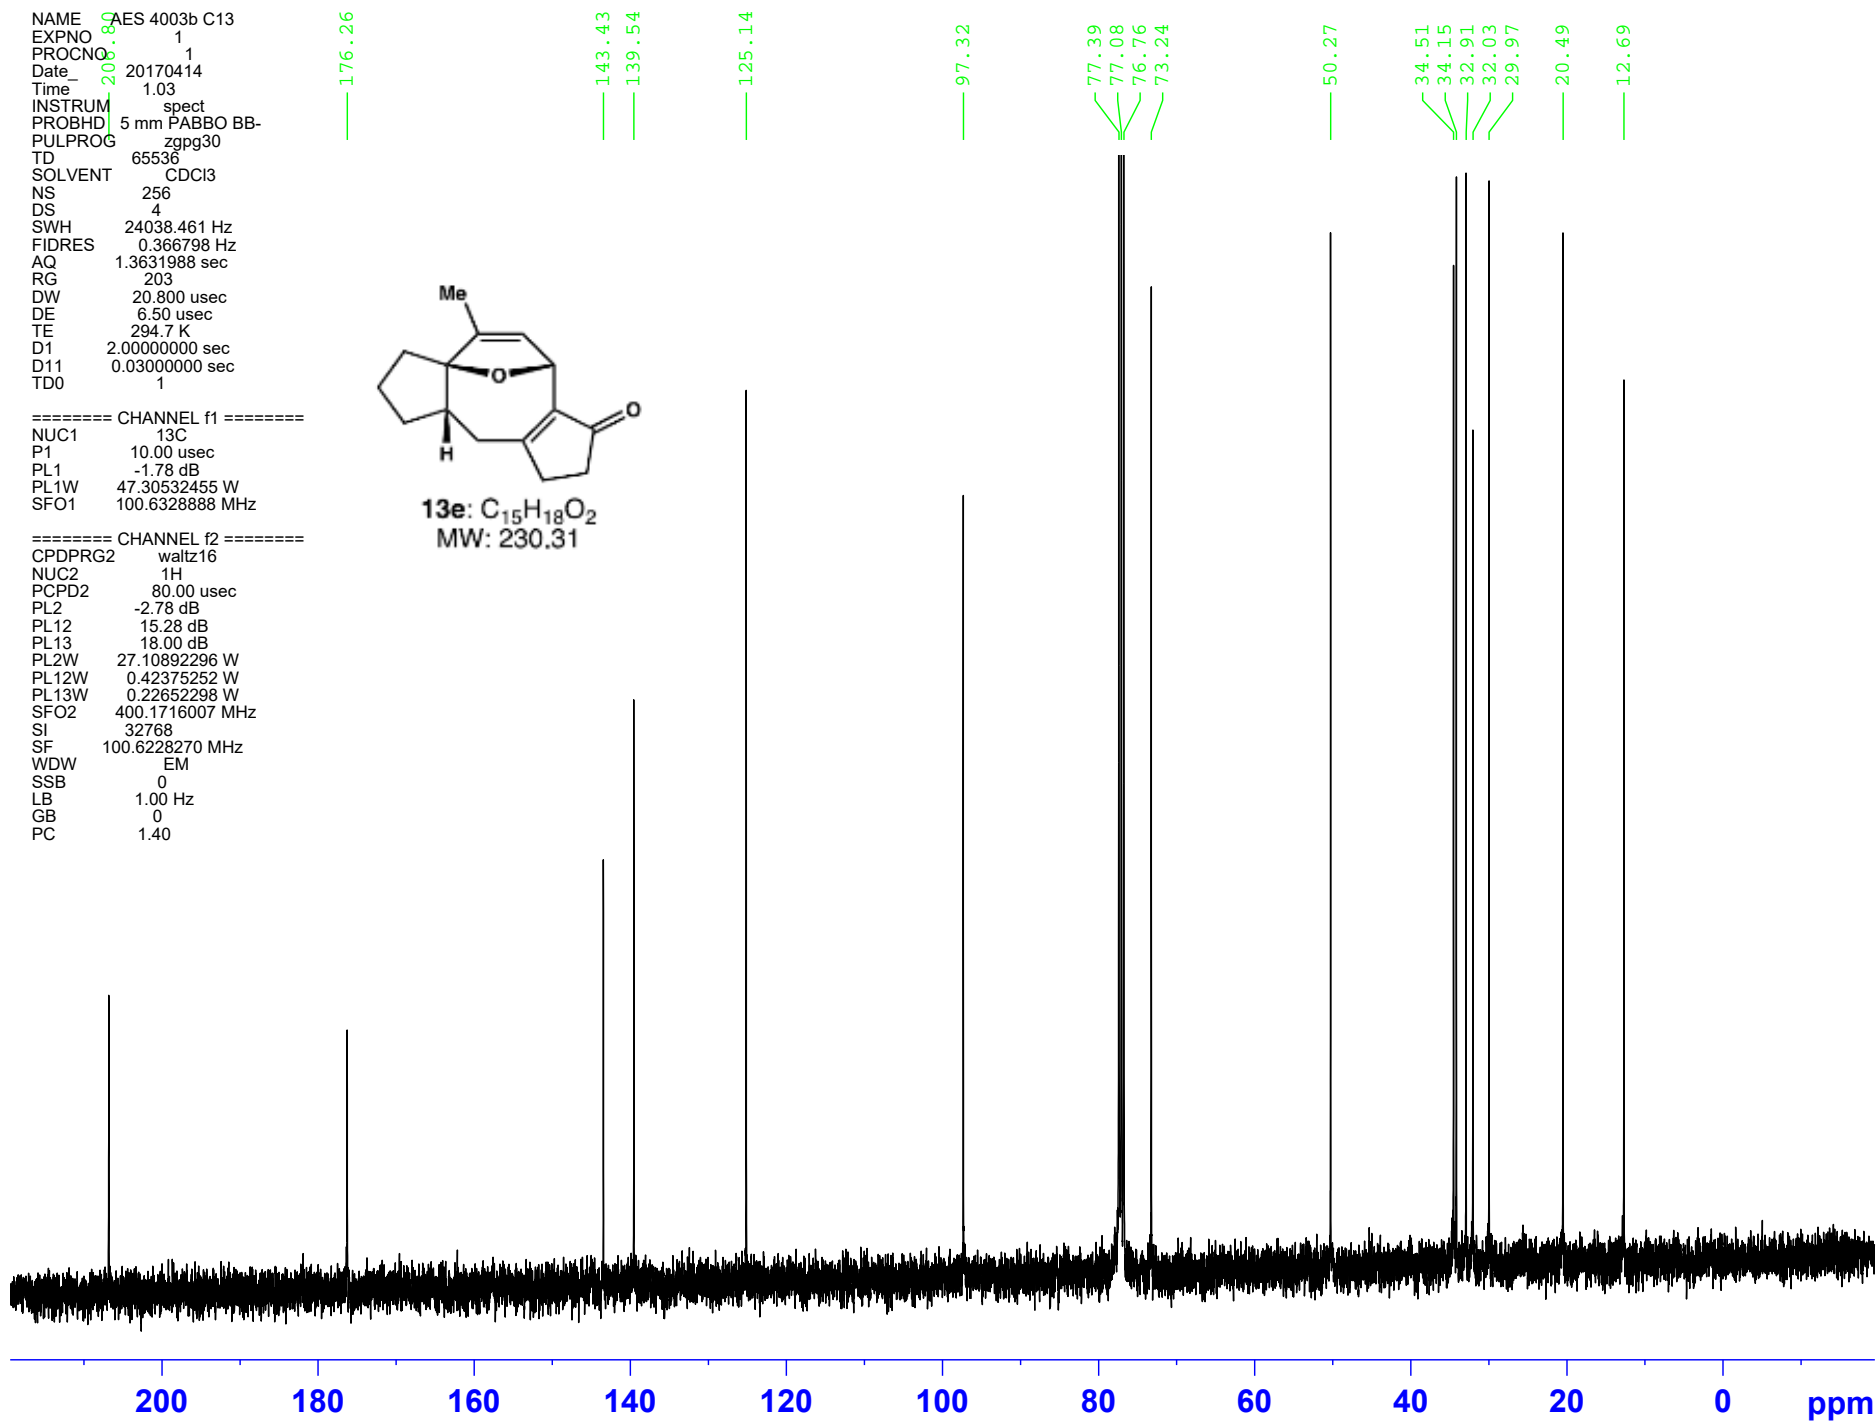

NAME AES 4061b  
 EXPNO 2  
 PROCNO 1  
 Date\_ 20170518  
 Time 20.29  
 INSTRUM spect  
 PROBHD 5 mm PABBO BB-  
 PULPROG zg30  
 TD 65536  
 SOLVENT CDCl3  
 NS 16  
 DS 2  
 SWH 8223.685 Hz  
 FIDRES 0.125483 Hz  
 AQ 3.9846387 sec  
 RG 203  
 DW 60.800 usec  
 DE 6.50 usec  
 TE 294.0 K  
 D1 1.00000000 sec  
 TD0 1

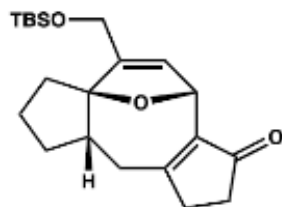

**13f:** C<sub>21</sub>H<sub>32</sub>O<sub>3</sub>Si  
 MW: 360.57

===== CHANNEL f1 =====  
 NUC1 1H  
 P1 10.00 usec  
 PL1 -2.78 dB  
 PL1W 27.10892296 W  
 SFO1 400.1724712 MHz  
 SI 32768  
 SF 400.1700091 MHz  
 WDW EM  
 SSB 0  
 LB 0.30 Hz  
 GB 0  
 PC 1.00

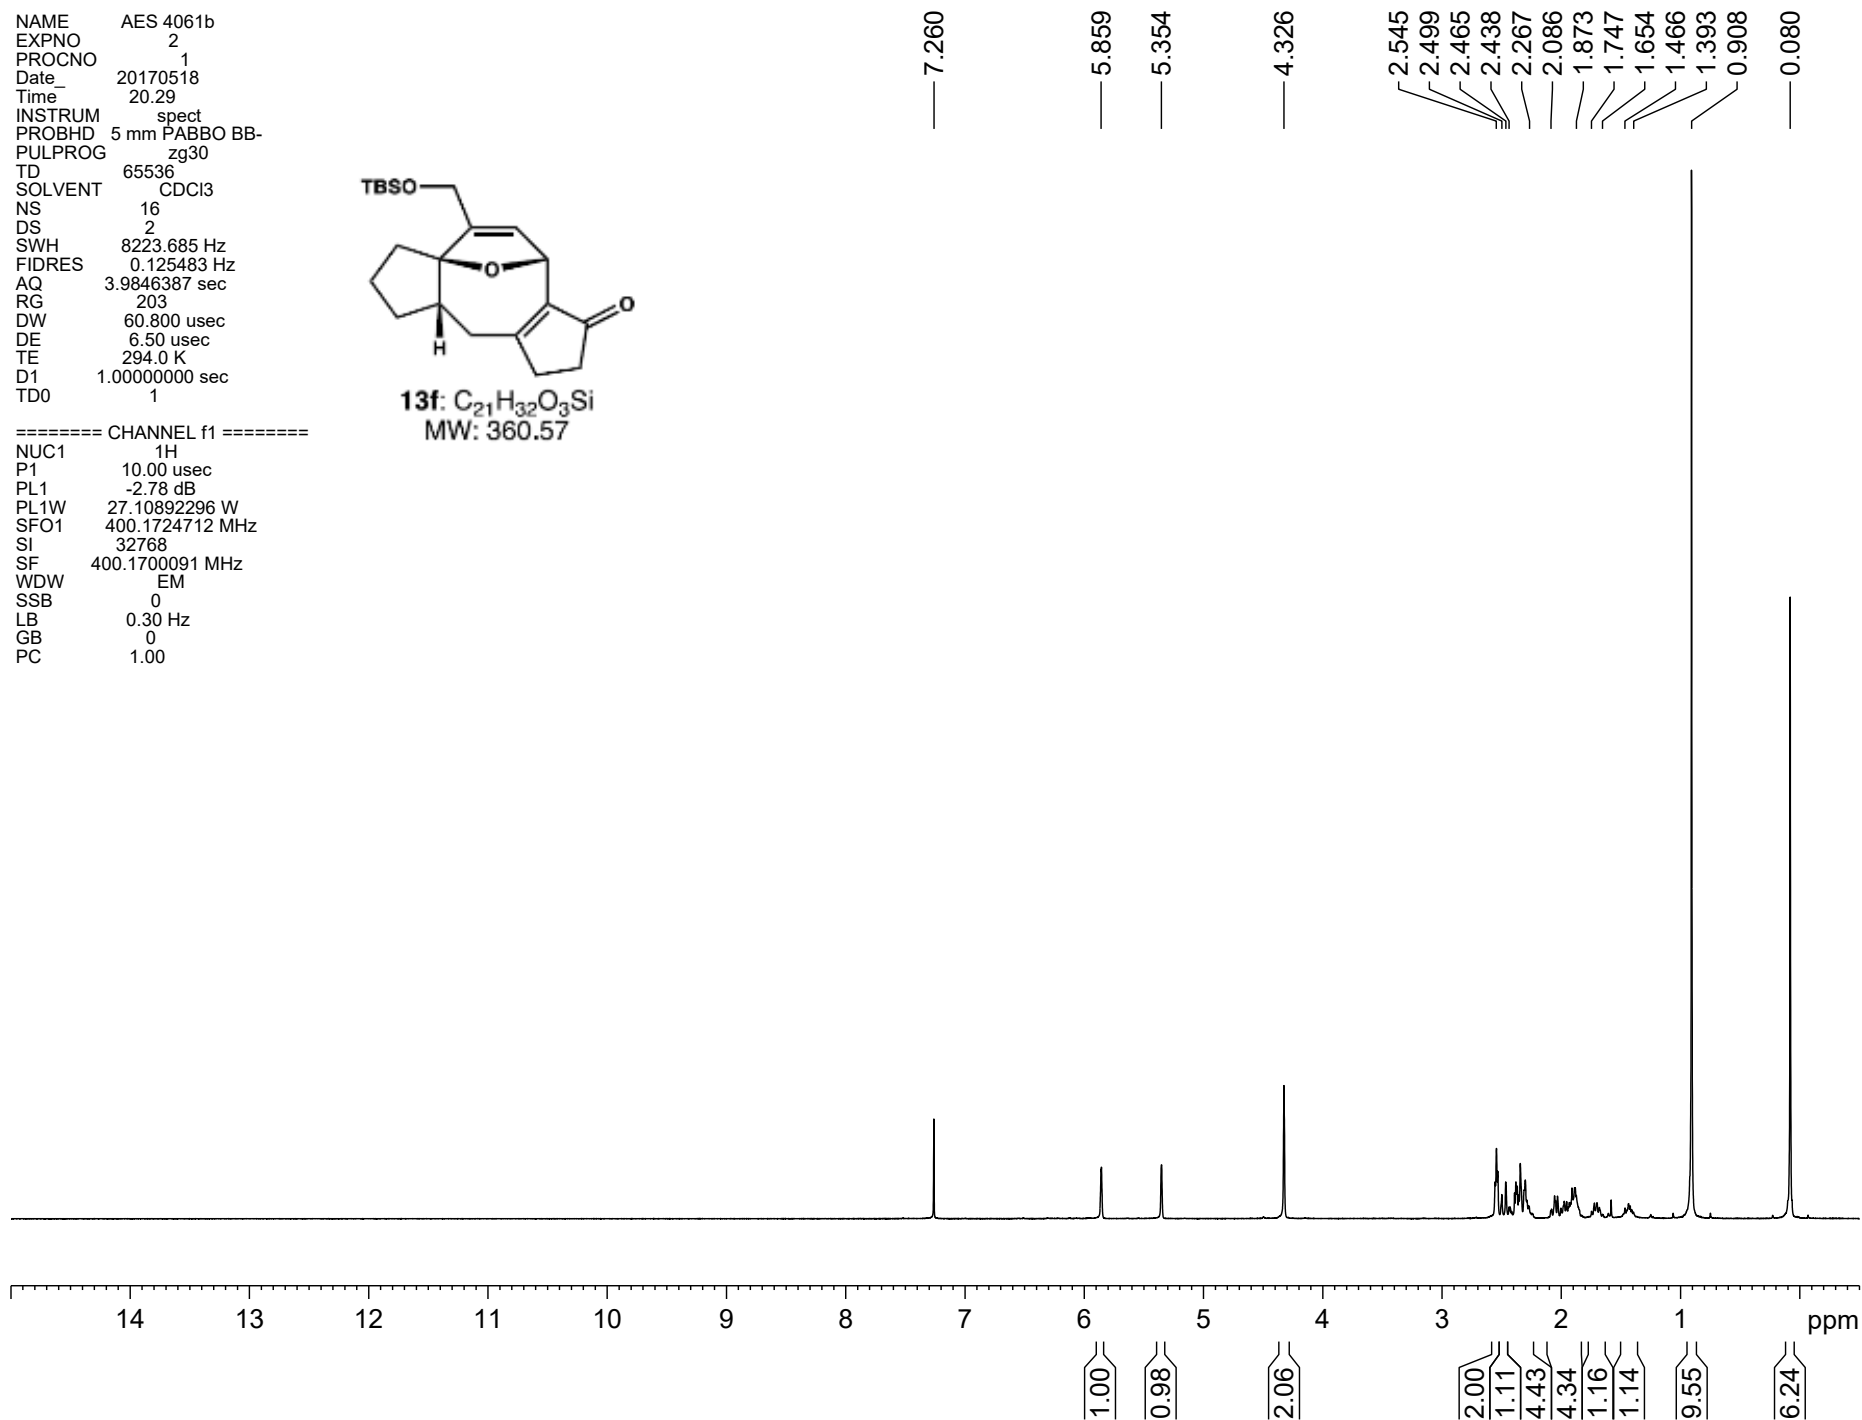



NAME AES 4061b C13  
 EXPNO 1  
 PROCNO 1  
 Date\_ 20170519  
 Time\_ 20:09:19  
 INSTRUM spect  
 PROBHD 5 mm PABBO BB-  
 PULPROG zgpg30  
 TD 65536  
 SOLVENT CDCl3  
 NS 256  
 DS 4  
 SWH 24038.461 Hz  
 FIDRES 0.366798 Hz  
 AQ 1.3631988 sec  
 RG 203  
 DW 20.800 usec  
 DE 6.50 usec  
 TE 294.2 K  
 D1 2.00000000 sec  
 D11 0.03000000 sec  
 TD0 1

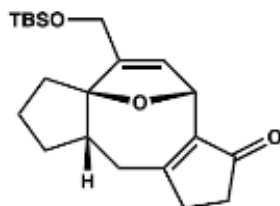

**13f:** C<sub>21</sub>H<sub>32</sub>O<sub>3</sub>Si  
 MW: 360.57

===== CHANNEL f1 =====  
 NUC1 13C  
 P1 10.00 usec  
 PL1 -1.78 dB  
 PL1W 47.30532455 W  
 SFO1 100.6328888 MHz

===== CHANNEL f2 =====  
 CPDPRG2 waltz16  
 NUC2 1H  
 PCPD2 80.00 usec  
 PL2 -2.78 dB  
 PL12 15.28 dB  
 PL13 18.00 dB  
 PL2W 27.10892296 W  
 PL12W 0.42375252 W  
 PL13W 0.22652298 W  
 SFO2 400.1716007 MHz  
 SI 32768  
 SF 100.6228270 MHz  
 WDW EM  
 SSB 0  
 LB 1.00 Hz  
 GB 0  
 PC 1.40

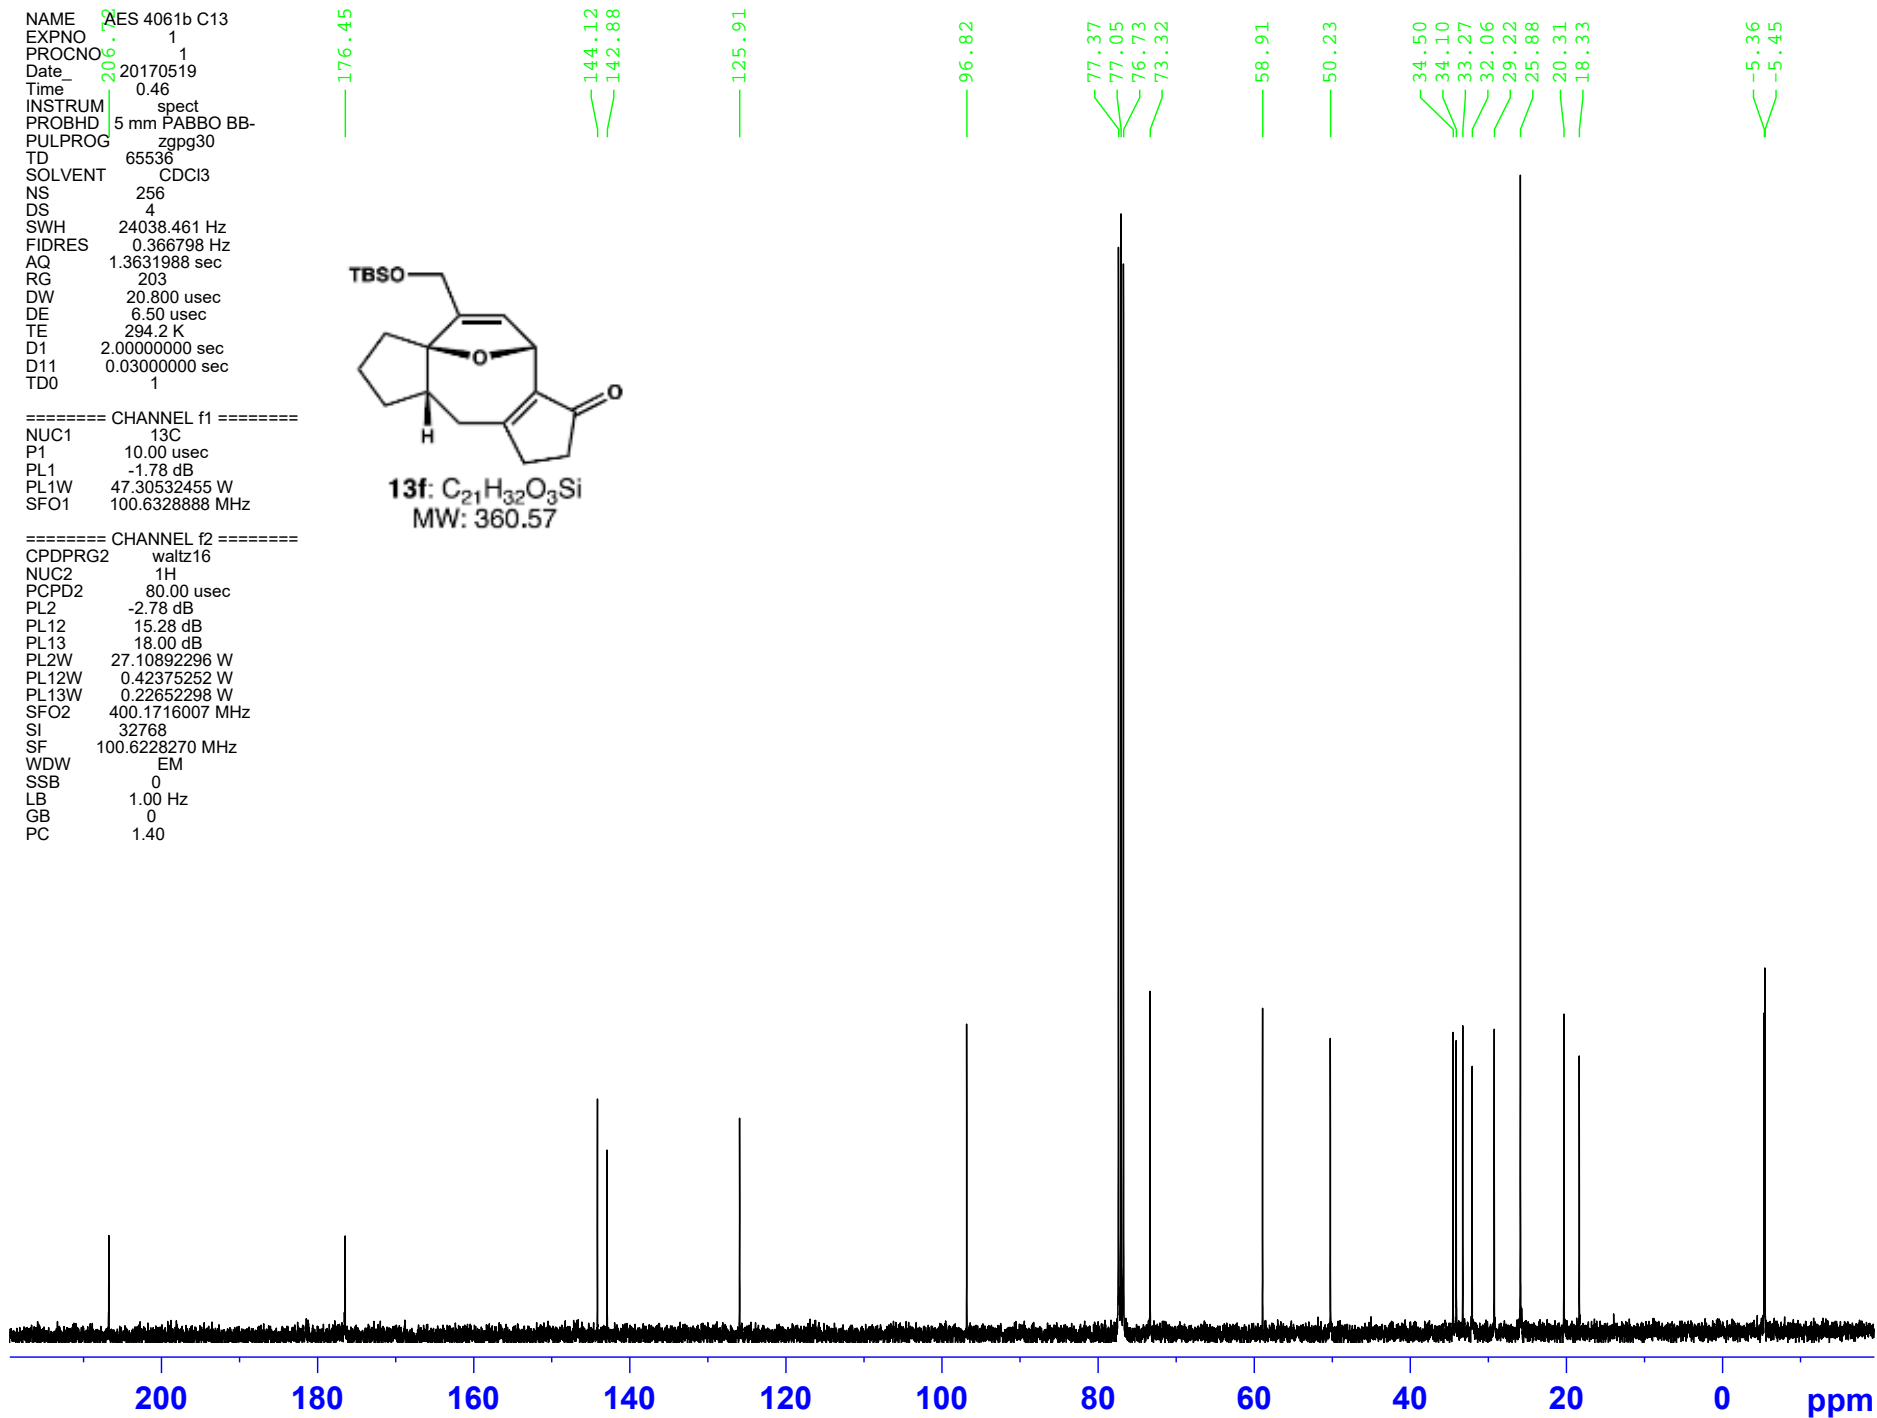

NAME AES 5108 [2+2] 20h then 1h 80 C et3N  
EXPNO 1  
PROCNO 1  
Date\_ 20171129  
Time 19.05  
INSTRUM spect  
PROBHD 5 mm PABBO BB-  
PULPROG zg30  
TD 65536  
SOLVENT CDCl3  
NS 16  
DS 2  
SWH 8223.685 Hz  
FIDRES 0.125483 Hz  
AQ 3.9846387 sec  
RG 203  
DW 60.800 usec  
DE 6.50 usec  
TE 294.9 K  
D1 1.00000000 sec  
TD0 1

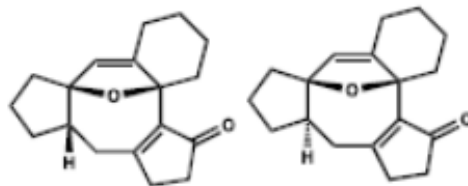

**13g**: C<sub>18</sub>H<sub>22</sub>O<sub>2</sub>  
MW: 270,37

**S14**: C<sub>18</sub>H<sub>22</sub>O<sub>2</sub>  
MW: 270,37

d.r = 10.1:1 (unpurified)

===== CHANNEL f1 =====  
NUC1 1H  
P1 10.00 usec  
PL1 -2.78 dB  
PL1W 27.10892296 W  
SFO1 400.1724712 MHz  
SI 32768  
SF 400.1700090 MHz  
WDW EM  
SSB 0  
LB 0.30 Hz  
GB 0  
PC 1.00

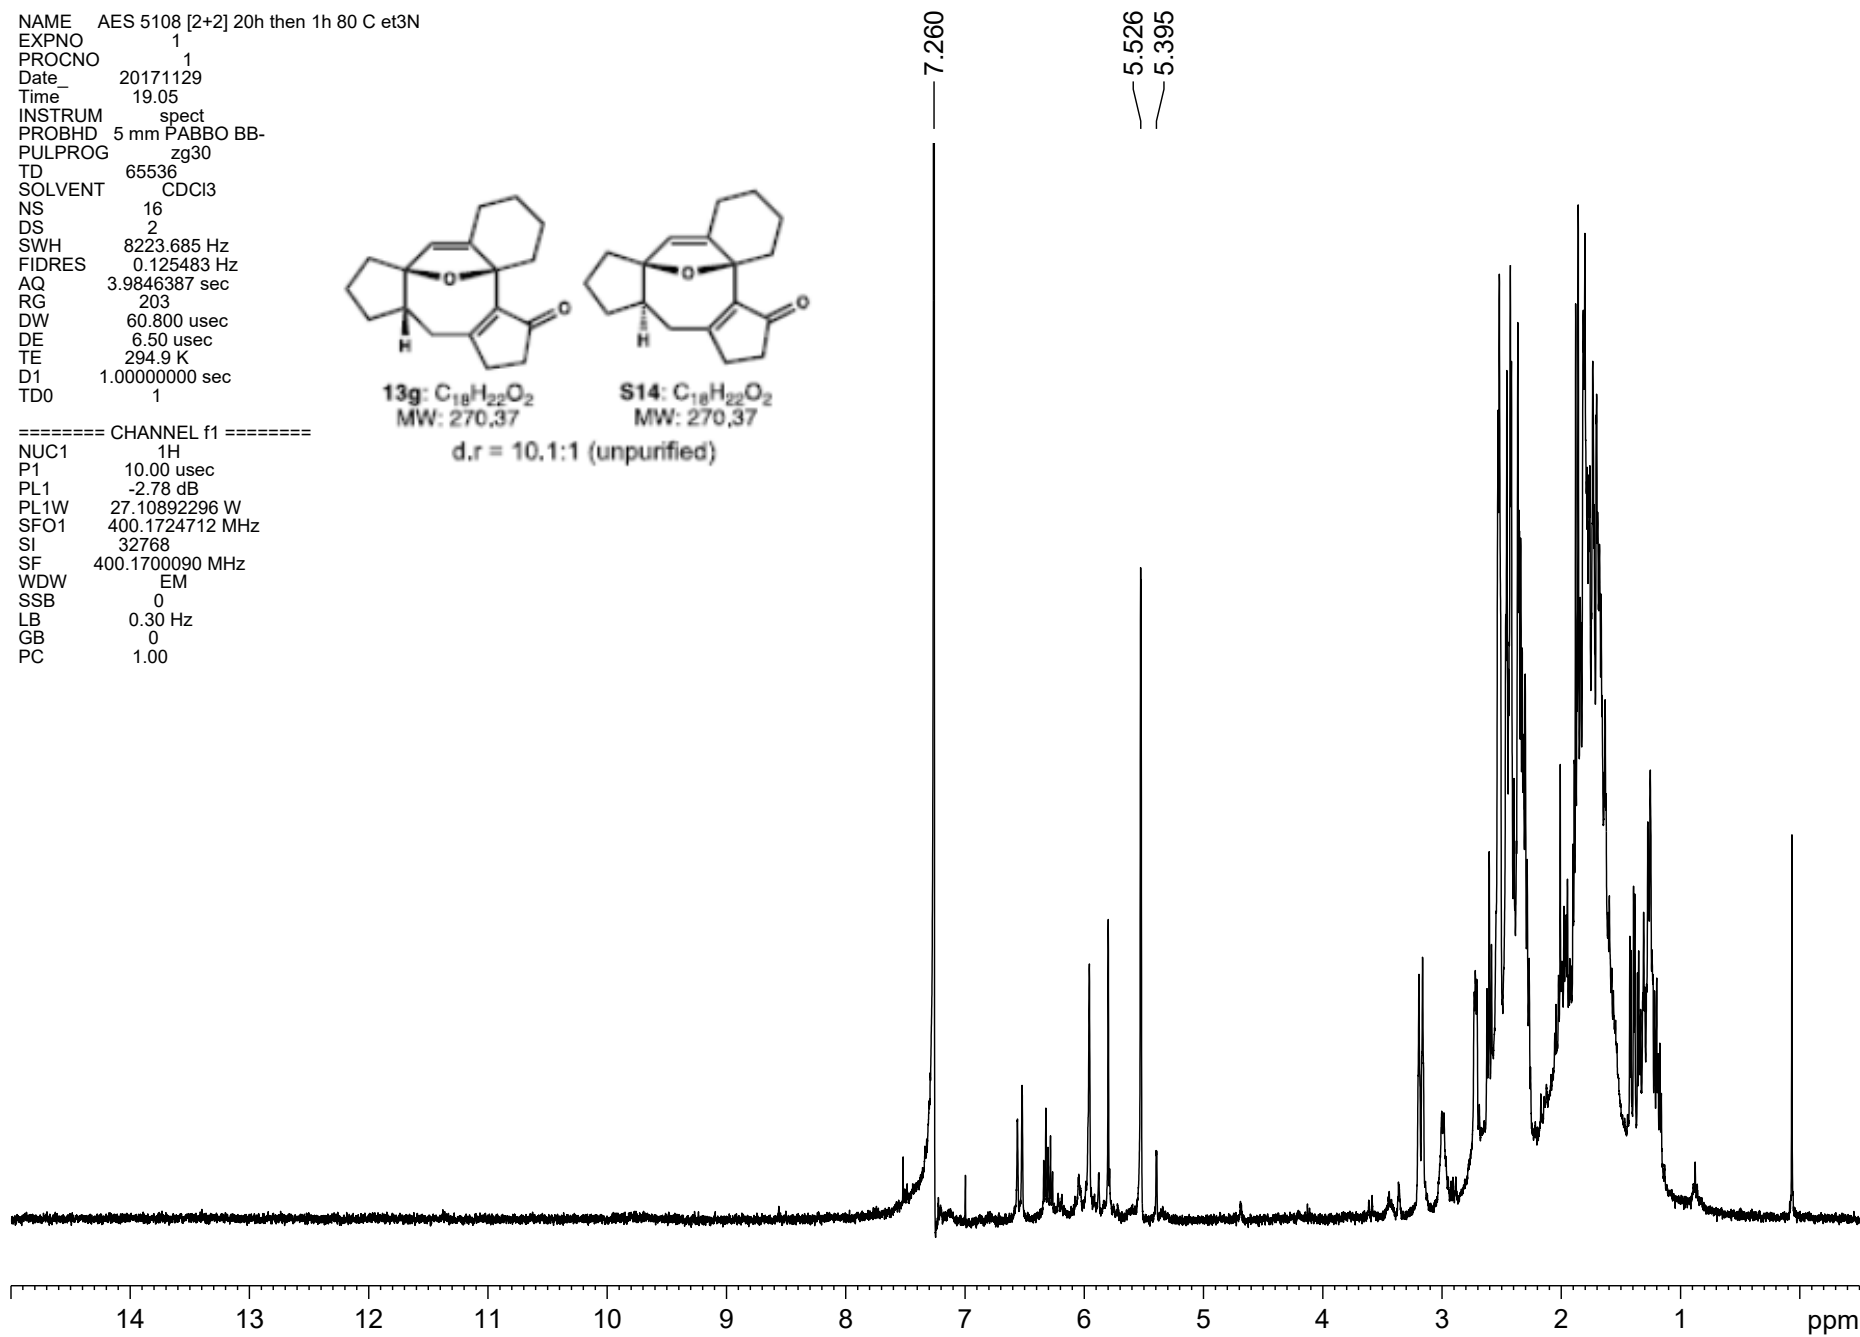

10.11  
1.00

NAME AES 5108c  
 EXPNO 1  
 PROCNO 1  
 Date\_ 20171130  
 Time 12.53  
 INSTRUM spect  
 PROBHD 5 mm PABBO BB-  
 PULPROG zg30  
 TD 65536  
 SOLVENT CDCl3  
 NS 8  
 DS 2  
 SWH 8223.685 Hz  
 FIDRES 0.125483 Hz  
 AQ 3.9846387 sec  
 RG 203  
 DW 60.800 usec  
 DE 6.50 usec  
 TE 294.7 K  
 D1 1.00000000 sec  
 TD0 1

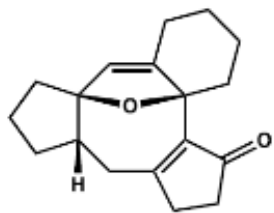

**13g:** C<sub>18</sub>H<sub>22</sub>O<sub>2</sub>  
 MW: 270.37

===== CHANNEL f1 =====  
 NUC1 1H  
 P1 10.00 usec  
 PL1 -2.78 dB  
 PL1W 27.10892296 W  
 SFO1 400.1724712 MHz  
 SI 32768  
 SF 400.1700091 MHz  
 WDW EM  
 SSB 0  
 LB 0.30 Hz  
 GB 0  
 PC 1.00

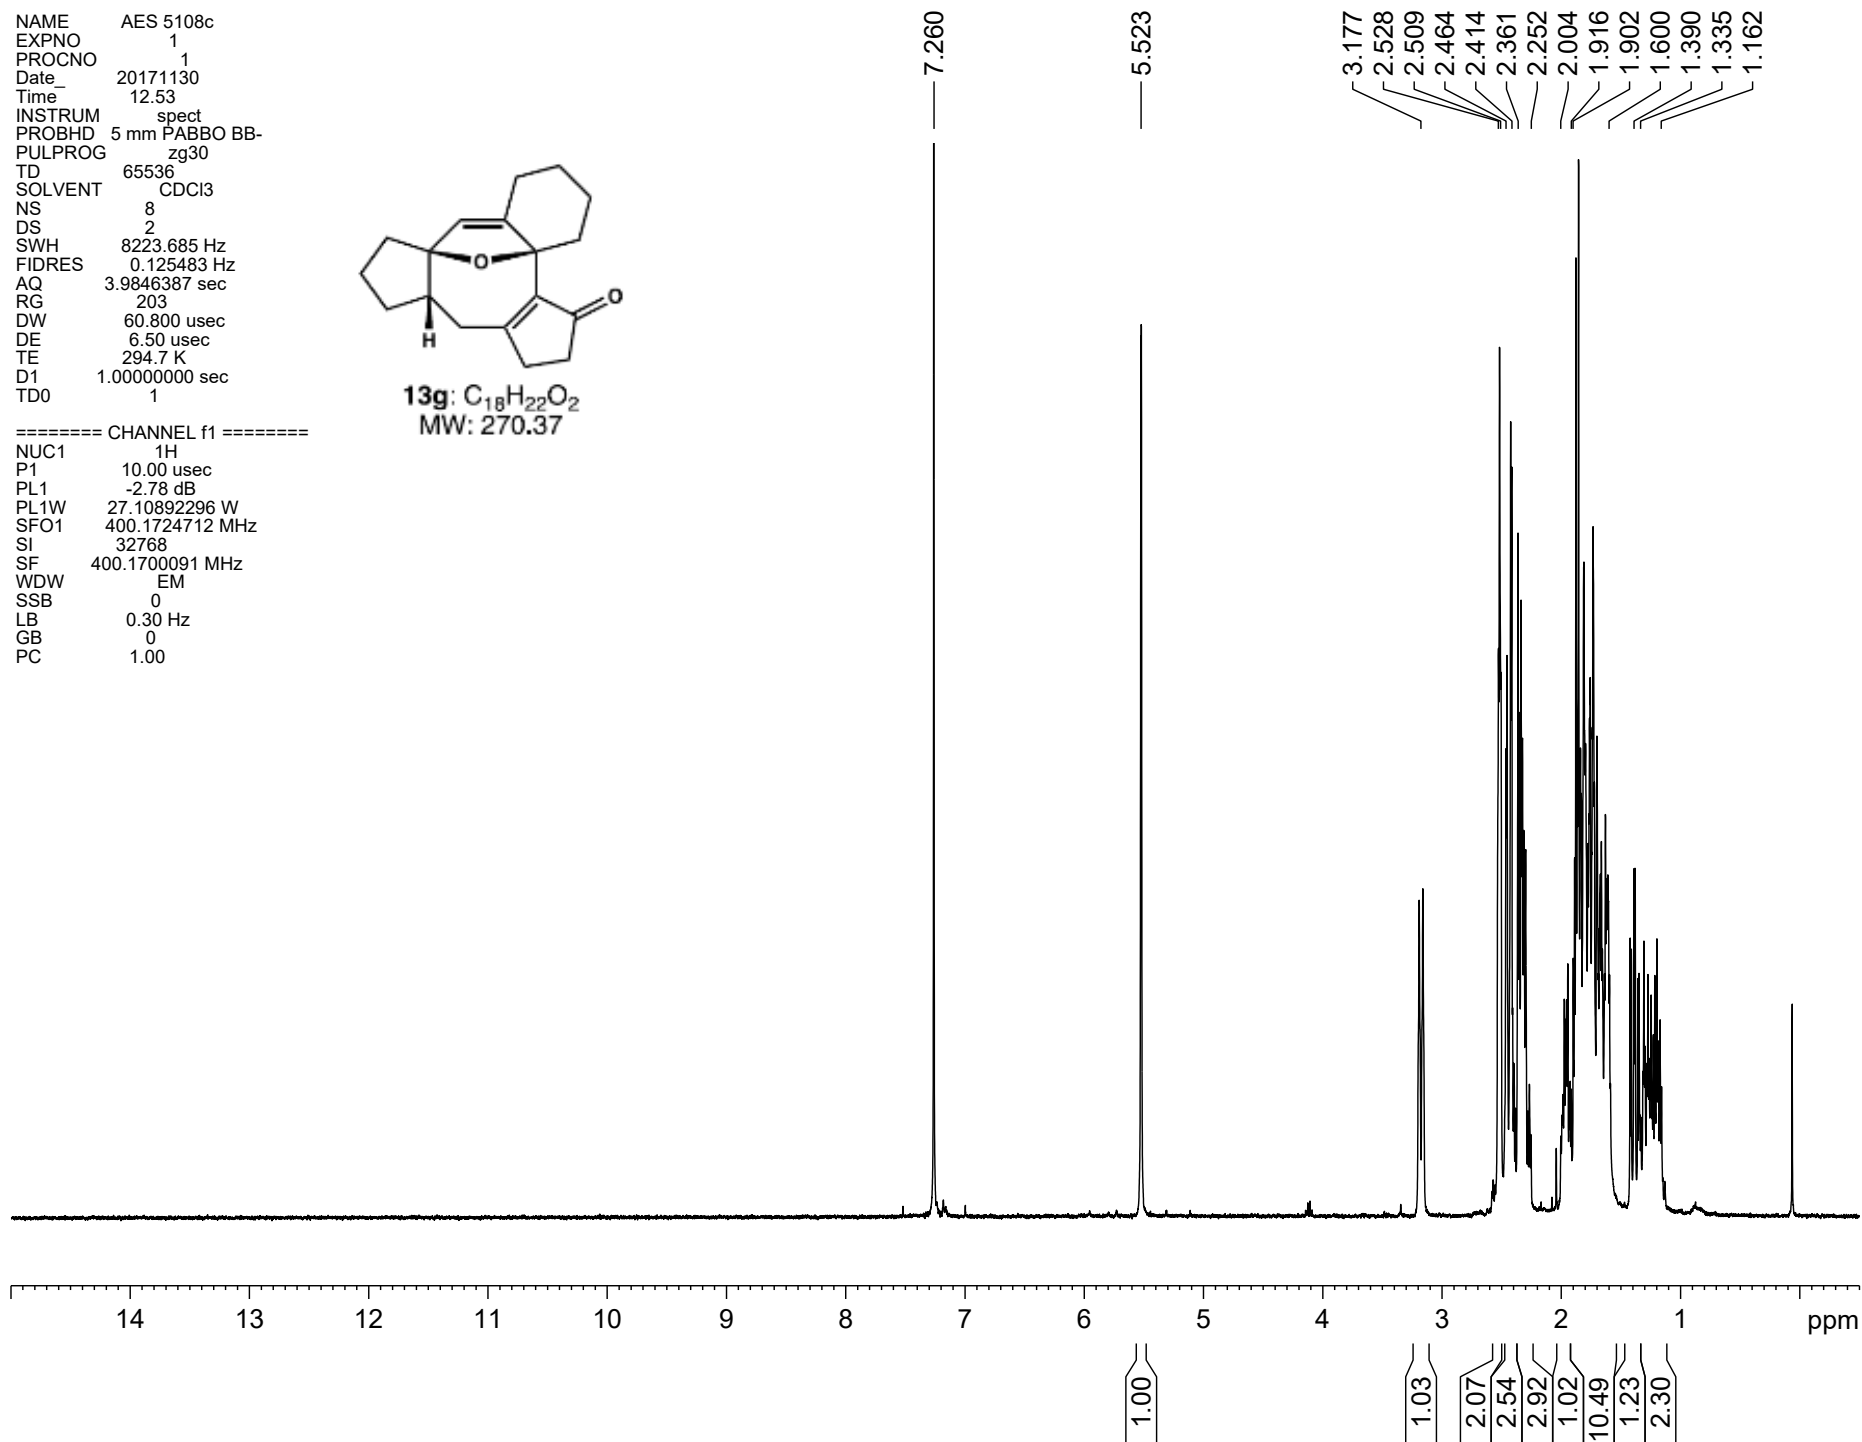

NAME AES 4084c C13  
 EXPNO 1  
 PROCNO 1  
 Date\_ 20170607  
 Time 23.00  
 INSTRUM spect  
 PROBHD 5 mm PABBO BB-  
 PULPROG zgpg30  
 TD 65536  
 SOLVENT CDCl3  
 NS 256  
 DS 4  
 SWH 24038.461 Hz  
 FIDRES 0.366798 Hz  
 AQ 1.3631988 sec  
 RG 203  
 DW 20.800 usec  
 DE 6.50 usec  
 TE 296.5 K  
 D1 2.00000000 sec  
 D11 0.03000000 sec  
 TD0 1

===== CHANNEL f1 =====  
 NUC1 13C  
 P1 10.00 usec  
 PL1 -1.78 dB  
 PL1W 47.30532455 W  
 SFO1 100.6328888 MHz

===== CHANNEL f2 =====  
 CPDPRG2 waltz16  
 NUC2 1H  
 PCPD2 80.00 usec  
 PL2 -2.78 dB  
 PL12 15.28 dB  
 PL13 18.00 dB  
 PL2W 27.10892296 W  
 PL12W 0.42375252 W  
 PL13W 0.22652298 W  
 SFO2 400.1716007 MHz  
 SI 32768  
 SF 100.6228270 MHz  
 WDW EM  
 SSB 0  
 LB 1.00 Hz  
 GB 0  
 PC 1.40

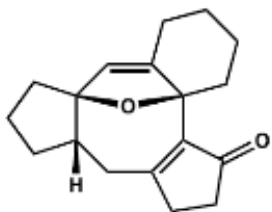

**13g: C<sub>18</sub>H<sub>22</sub>O<sub>2</sub>**  
**MW: 270.37**

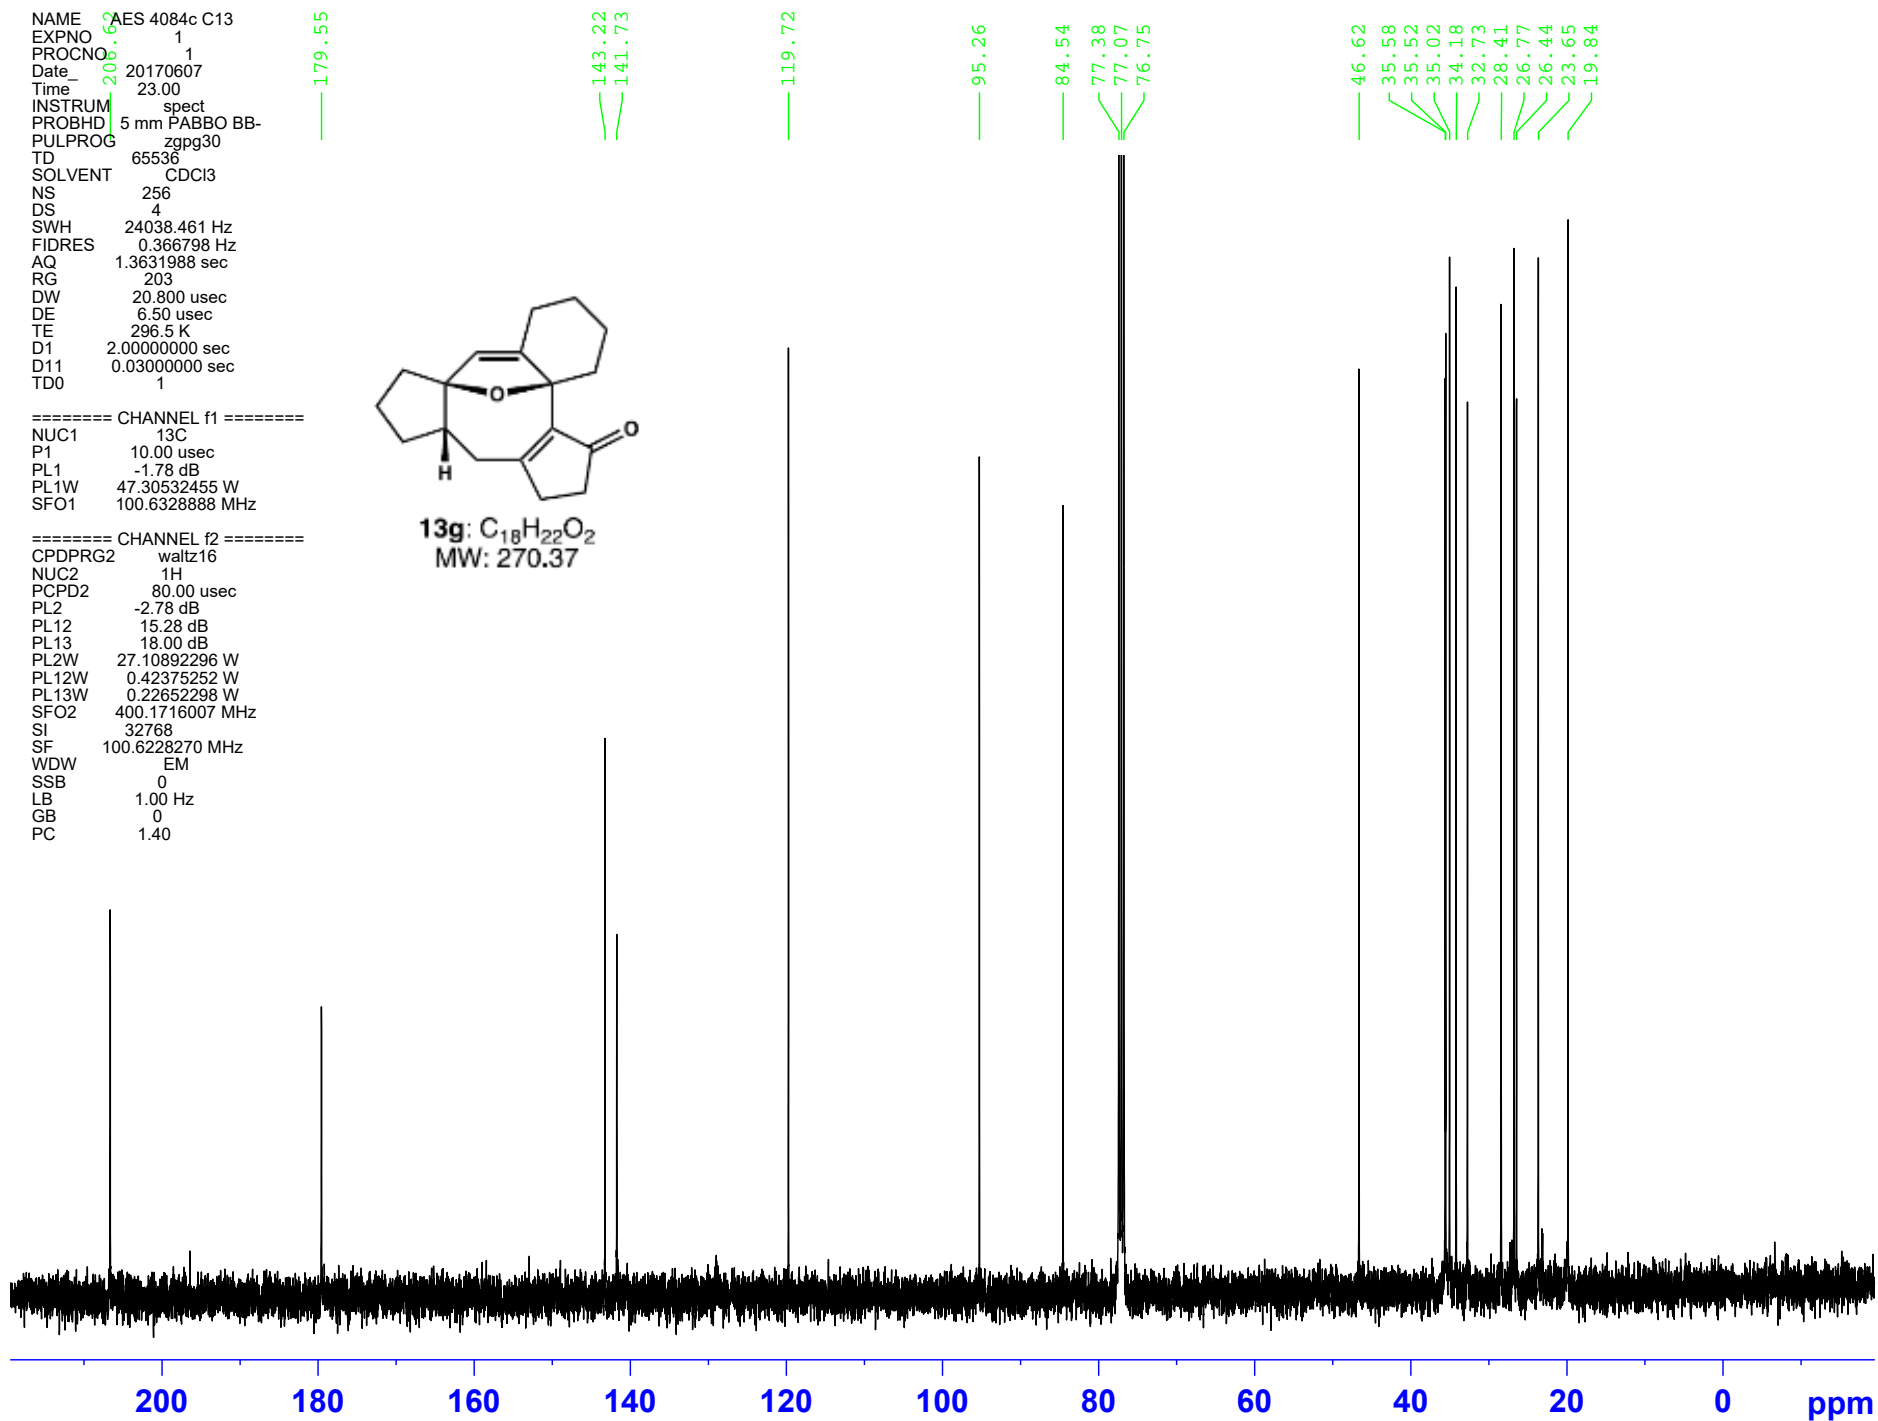

NAME AES 4062b\_1H  
 EXPNO 1  
 PROCNO 1  
 Date\_ 20170525  
 Time 0.58  
 INSTRUM spect  
 PROBHD 5 mm PABBO BB-  
 PULPROG zg30  
 TD 65536  
 SOLVENT CDCl3  
 NS 16  
 DS 2  
 SWH 8223.685 Hz  
 FIDRES 0.125483 Hz  
 AQ 3.9846387 sec  
 RG 144  
 DW 60.800 usec  
 DE 6.50 usec  
 TE 293.8 K  
 D1 1.00000000 sec  
 TD0 1

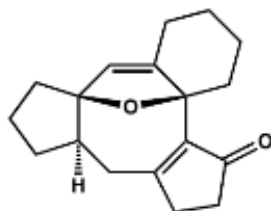

**S14: C<sub>18</sub>H<sub>22</sub>O<sub>2</sub>**  
 MW: 270.37

===== CHANNEL f1 =====  
 NUC1 1H  
 P1 10.00 usec  
 PL1 -2.78 dB  
 PL1W 27.10892296 W  
 SFO1 400.1724712 MHz  
 SI 32768  
 SF 400.1700091 MHz  
 WDW EM  
 SSB 0  
 LB 0.30 Hz  
 GB 0  
 PC 1.00

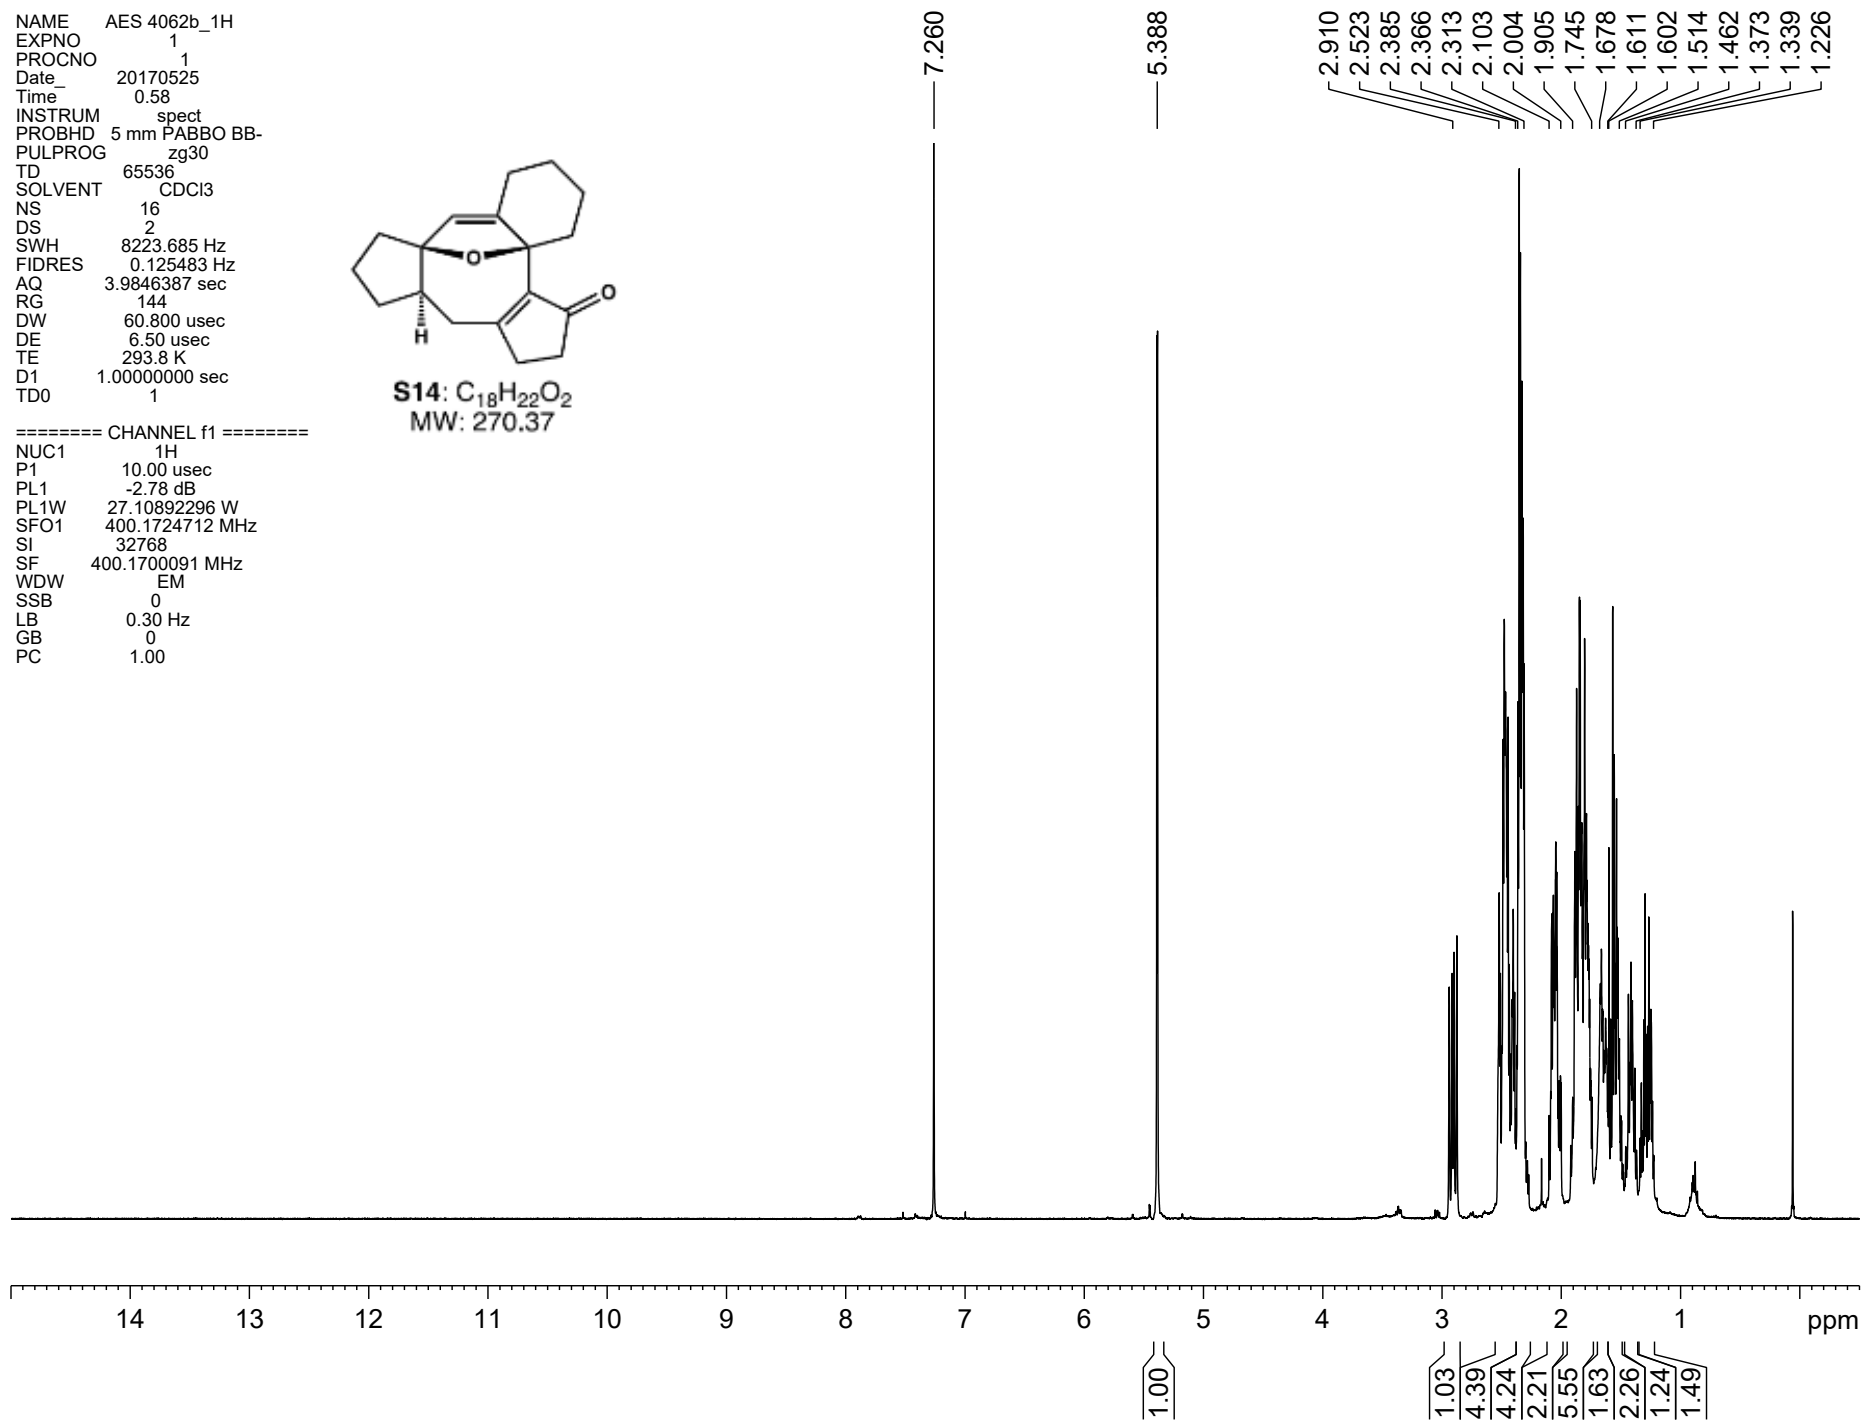

NAME AES 4062b C13  
 EXPNO 1  
 PROCNO 1  
 Date\_ 20170523  
 Time\_ 19.30  
 INSTRUM spect  
 PROBHD 5 mm PABBO BB-  
 PULPROG zgpg30  
 TD 65536  
 SOLVENT CDCl3  
 NS 1024  
 DS 4  
 SWH 36057.691 Hz  
 FIDRES 0.550197 Hz  
 AQ 0.9088159 sec  
 RG 203  
 DW 13.867 usec  
 DE 6.50 usec  
 TE 298.3 K  
 D1 2.00000000 sec  
 D11 0.03000000 sec  
 TD0 1

176.72

146.70  
145.34

94.63

86.93

77.23

77.02

76.81

45.85

38.82

36.71

36.40

35.84

32.70

32.53

26.61

25.86

23.67

22.33

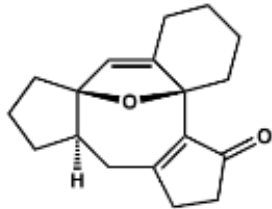

S14: C<sub>18</sub>H<sub>22</sub>O<sub>2</sub>  
 MW: 270.37

===== CHANNEL f1 =====  
 NUC1 13C  
 P1 9.50 usec  
 PL1 3.00 dB  
 PL1W 59.92485046 W  
 SFO1 150.9178988 MHz

===== CHANNEL f2 =====  
 CPDPRG2 waltz16  
 NUC2 1H  
 PCPD2 80.00 usec  
 PL2 -1.40 dB  
 PL12 14.38 dB  
 PL13 13.70 dB  
 PL2W 16.22728539 W  
 PL12W 0.42879117 W  
 PL13W 0.50147104 W  
 SFO2 600.1324005 MHz  
 SI 32768  
 SF 150.9028090 MHz  
 WDW EM  
 SSB 0  
 LB 1.00 Hz  
 GB 0  
 PC 1.40

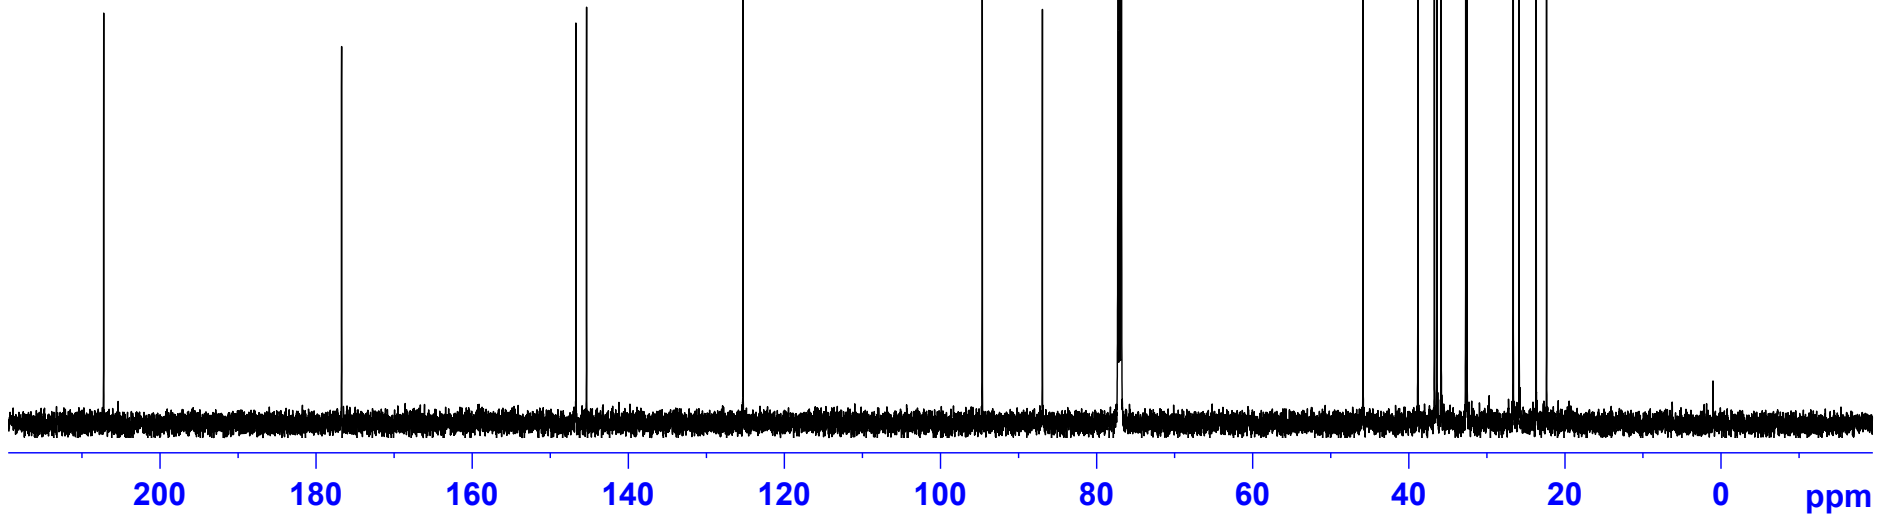

NAME AES 4280b  
 EXPNO 2  
 PROCNO 1  
 Date\_ 20171006  
 Time 22.53  
 INSTRUM spect  
 PROBHD 5 mm PABBO BB-  
 PULPROG zg30  
 TD 65536  
 SOLVENT CDCl3  
 NS 16  
 DS 2  
 SWH 8223.685 Hz  
 FIDRES 0.125483 Hz  
 AQ 3.9846387 sec  
 RG 71.8  
 DW 60.800 usec  
 DE 6.50 usec  
 TE 293.9 K  
 D1 1.00000000 sec  
 TD0 1

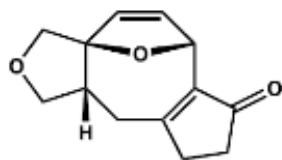

**13h**: C<sub>13</sub>H<sub>14</sub>O<sub>3</sub>  
 MW: 218.25

===== CHANNEL f1 =====  
 NUC1 1H  
 P1 10.00 usec  
 PL1 -2.78 dB  
 PL1W 27.10892296 W  
 SFO1 400.1724712 MHz  
 SI 32768  
 SF 400.1700093 MHz  
 WDW EM  
 SSB 0  
 LB 0.30 Hz  
 GB 0  
 PC 1.00

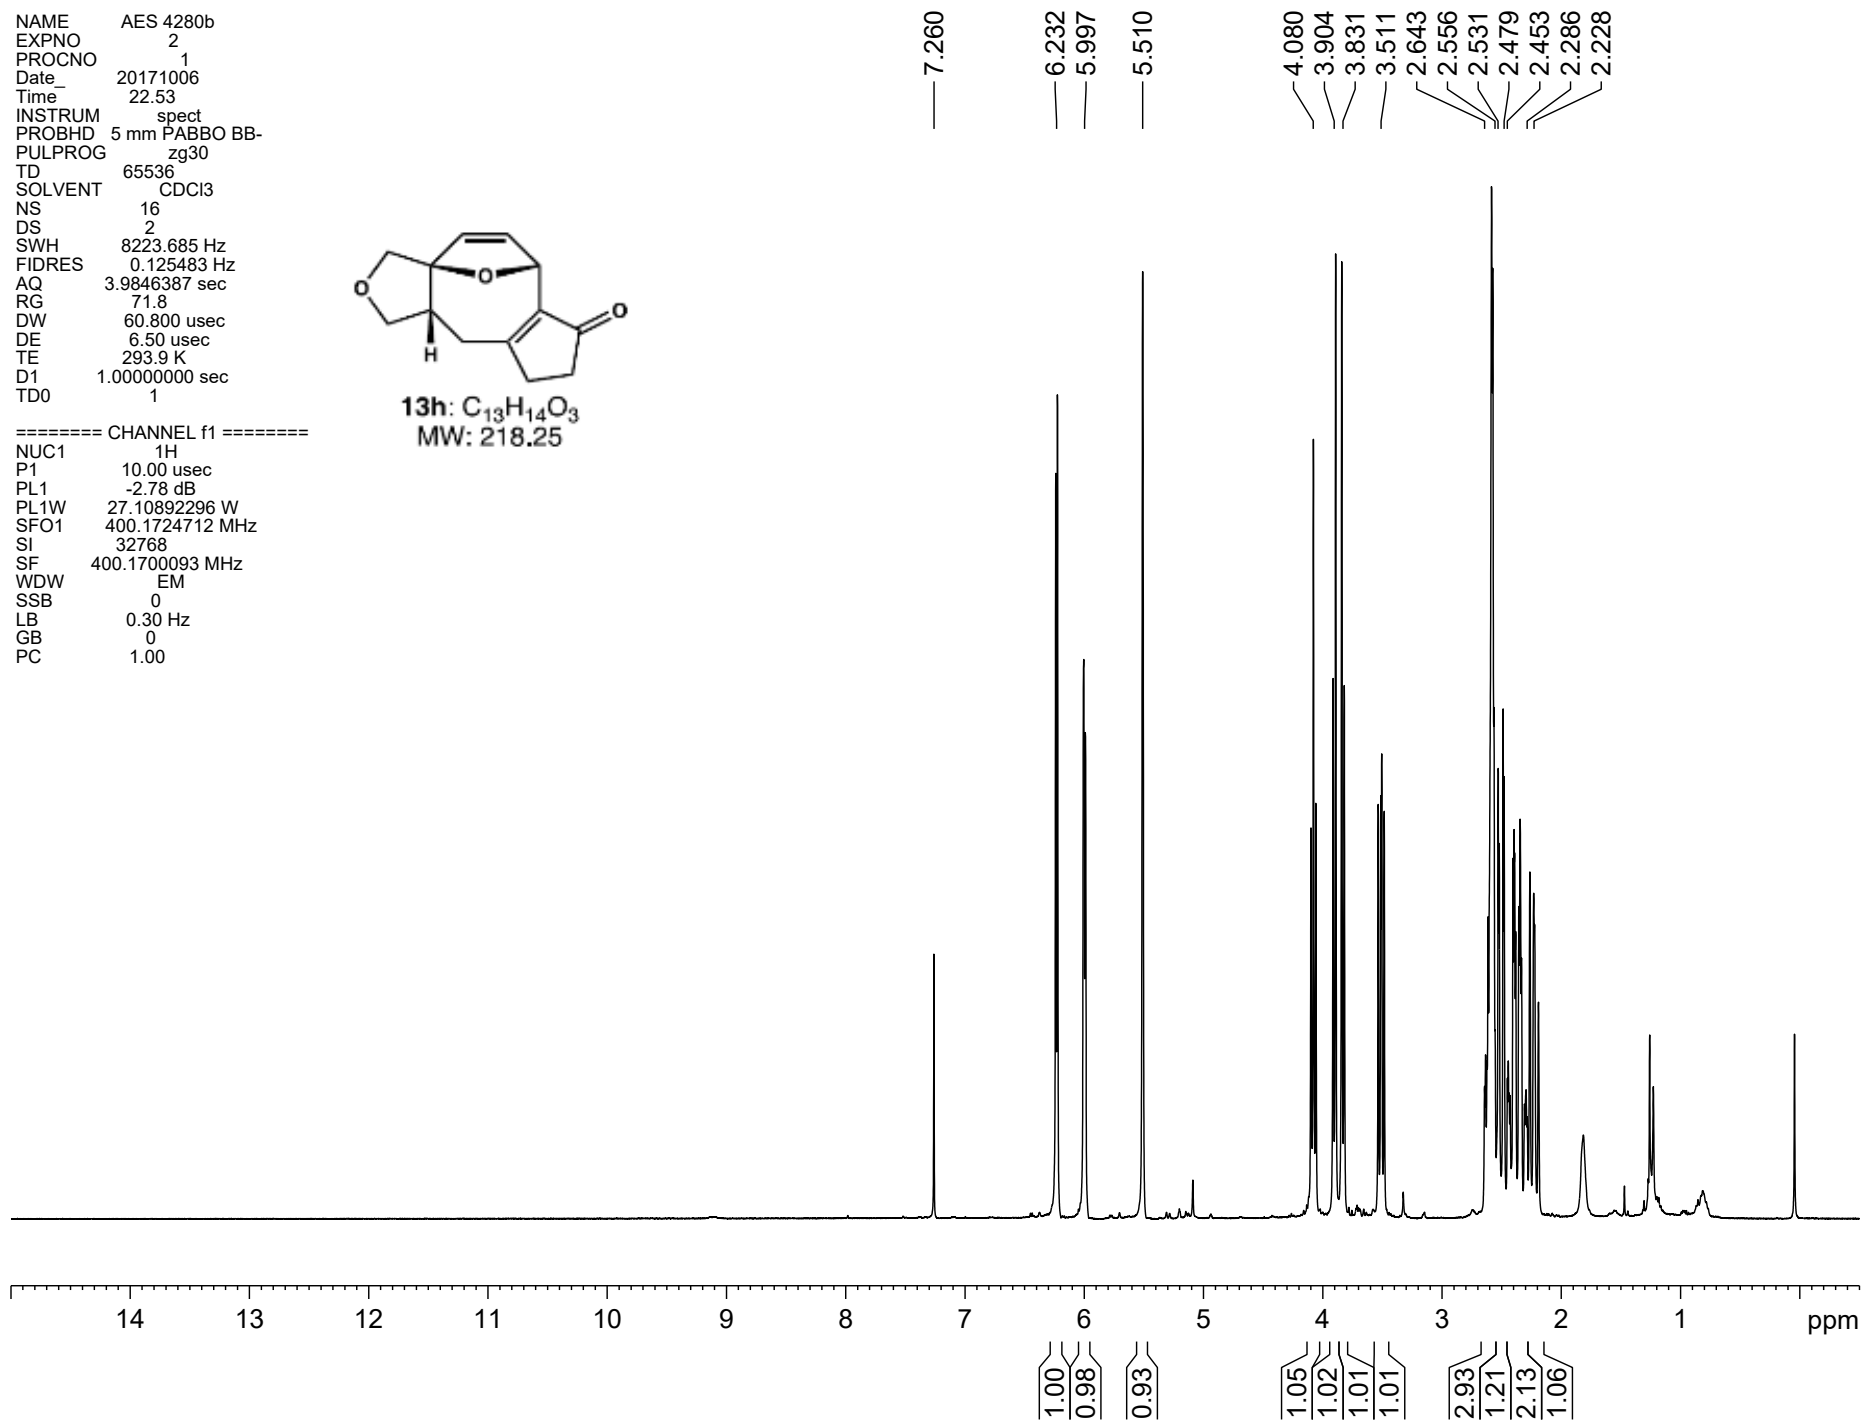

NAME AES 4218c C13  
 EXPNO 1  
 PROCNO 1  
 Date\_ 20170822  
 Time 20:06:39  
 INSTRUM spect  
 PROBHD 5 mm PABBO BB-  
 PULPROG zgpg30  
 TD 65536  
 SOLVENT CDCl3  
 NS 2512  
 DS 4  
 SWH 36057.691 Hz  
 FIDRES 0.550197 Hz  
 AQ 0.9088159 sec  
 RG 203  
 DW 13.867 usec  
 DE 6.50 usec  
 TE 295.9 K  
 D1 2.00000000 sec  
 D11 0.03000000 sec  
 TD0 1

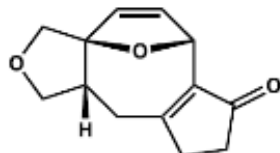

**13h: C<sub>13</sub>H<sub>14</sub>O<sub>3</sub>**  
**MW: 218.25**

===== CHANNEL f1 =====  
 NUC1 13C  
 P1 9.50 usec  
 PL1 3.00 dB  
 PL1W 59.92485046 W  
 SFO1 150.9178988 MHz

===== CHANNEL f2 =====  
 CPDPRG2 waltz16  
 NUC2 1H  
 PCPD2 80.00 usec  
 PL2 -1.40 dB  
 PL12 14.38 dB  
 PL13 13.70 dB  
 PL2W 16.22728539 W  
 PL12W 0.42879117 W  
 PL13W 0.50147104 W  
 SFO2 600.1324005 MHz  
 SI 32768  
 SF 150.9028090 MHz  
 WDW EM  
 SSB 0  
 LB 1.00 Hz  
 GB 0  
 PC 1.40

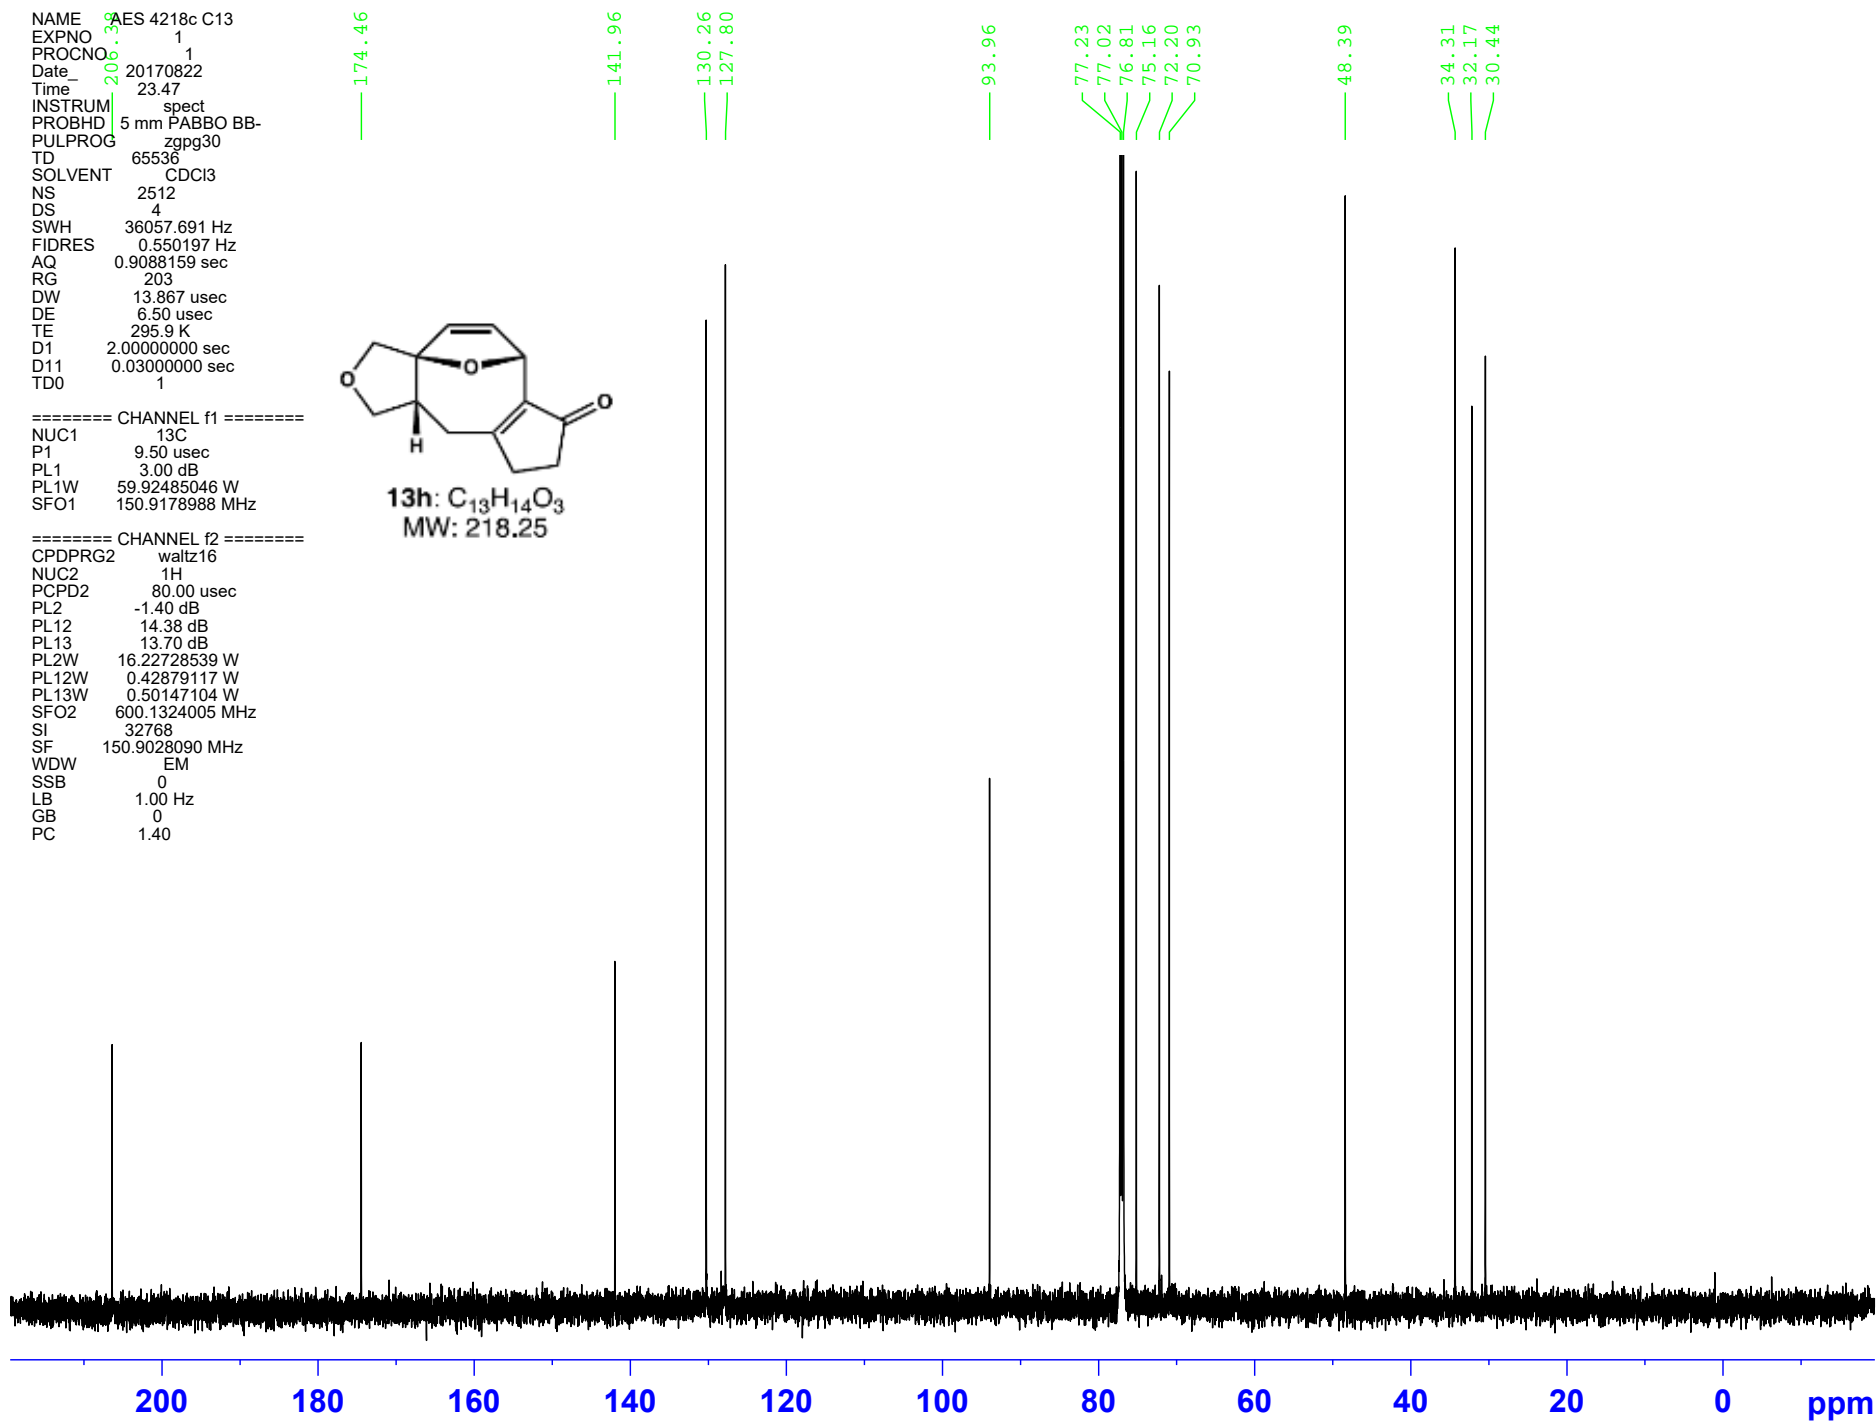



NAME AES 5160 1H  
 EXPNO 1  
 PROCNO 1  
 Date\_ 20180103  
 Time 16.09  
 INSTRUM spect  
 PROBHD 5 mm PABBO BB-  
 PULPROG zg30  
 TD 65536  
 SOLVENT CDCl3  
 NS 16  
 DS 2  
 SWH 12335.526 Hz  
 FIDRES 0.188225 Hz  
 AQ 2.6564426 sec  
 RG 114  
 DW 40.533 usec  
 DE 6.50 usec  
 TE 298.2 K  
 D1 1.00000000 sec  
 TD0 1

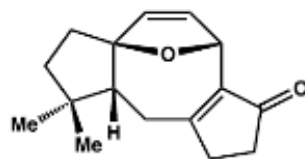

**13i**: C<sub>16</sub>H<sub>20</sub>O<sub>2</sub>  
 MW: 244.33

===== CHANNEL f1 =====  
 NUC1 1H  
 P1 13.00 usec  
 PL1 -1.40 dB  
 PL1W 16.22728539 W  
 SFO1 600.1337060 MHz  
 SI 32768  
 SF 600.1300167 MHz  
 WDW EM  
 SSB 0  
 LB 0.30 Hz  
 GB 0  
 PC 1.00

7.260

6.062

5.883

5.420

2.589

2.563

2.399

2.338

2.206

2.006

1.948

1.765

1.719

1.566

1.056

0.880

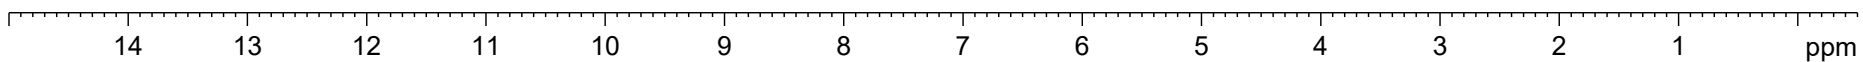

1.11

1.08

1.00

2.03

1.20

3.51

3.47

1.22

1.20

3.37

3.42

ppm

NAME AES 5160 C13  
 EXPNO 1  
 PROCNO 1  
 Date\_ 20180103  
 Time\_ 17.45  
 INSTRUM spect  
 PROBHD 5 mm PABBO BB-  
 PULPROG zgpg30  
 TD 65536  
 SOLVENT CDCl3  
 NS 2625  
 DS 4  
 SWH 36057.691 Hz  
 FIDRES 0.550197 Hz  
 AQ 0.9088159 sec  
 RG 203  
 DW 13.867 usec  
 DE 6.50 usec  
 TE 298.2 K  
 D1 2.00000000 sec  
 D11 0.03000000 sec  
 TD0 1

===== CHANNEL f1 =====  
 NUC1 13C  
 P1 9.50 usec  
 PL1 3.00 dB  
 PL1W 59.92485046 W  
 SFO1 150.9178988 MHz

===== CHANNEL f2 =====  
 CPDPRG2 waltz16  
 NUC2 1H  
 PCPD2 80.00 usec  
 PL2 -1.40 dB  
 PL12 14.38 dB  
 PL13 13.70 dB  
 PL2W 16.22728539 W  
 PL12W 0.42879117 W  
 PL13W 0.50147104 W  
 SFO2 600.1324005 MHz  
 SI 32768  
 SF 150.9028090 MHz  
 WDW EM  
 SSB 0  
 LB 1.00 Hz  
 GB 0  
 PC 1.40

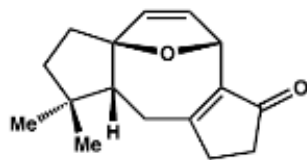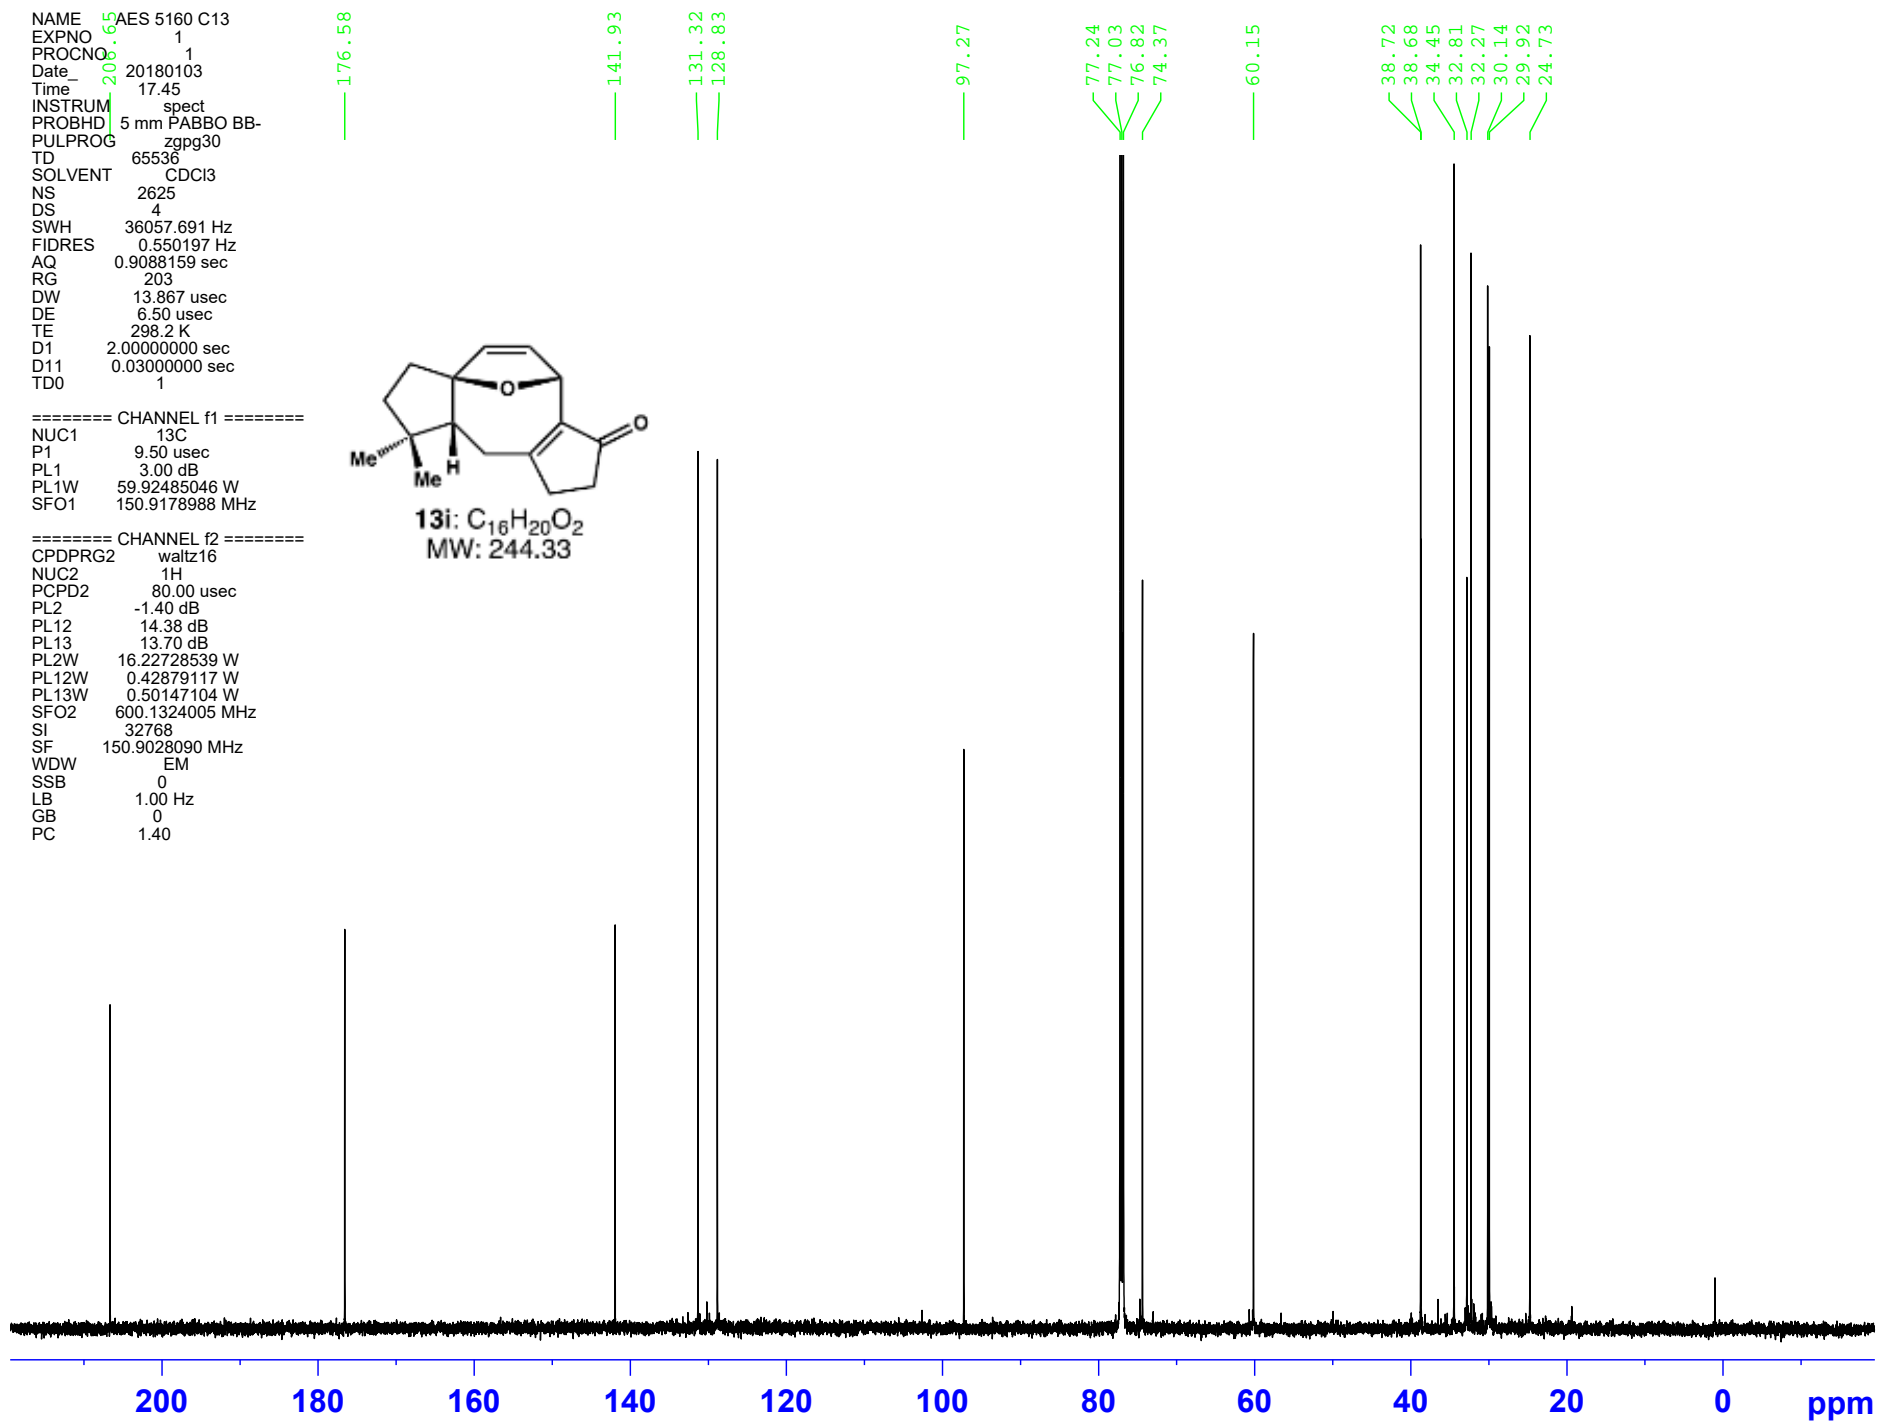

NAME AES 5181 6h then 1h 100C et3N  
EXPNO 1  
PROCNO 1  
Date\_ 20180112  
Time 23.17  
INSTRUM spect  
PROBHD 5 mm PABBO BB-  
PULPROG zg30  
TD 65536  
SOLVENT CD3CN  
NS 8  
DS 2  
SWH 8223.685 Hz  
FIDRES 0.125483 Hz  
AQ 3.9846387 sec  
RG 203  
DW 60.800 usec  
DE 6.50 usec  
TE 294.8 K  
D1 1.00000000 sec  
TD0 1

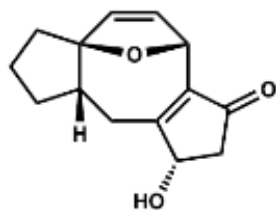

**13j**: C<sub>14</sub>H<sub>16</sub>O<sub>3</sub>  
MW: 232.28  
d.r. = 1.3:1

===== CHANNEL f1 =====  
NUC1 1H  
P1 10.00 usec  
PL1 -2.78 dB  
PL1W 27.10892296 W  
SFO1 400.1724712 MHz  
SI 32768  
SF 400.1700000 MHz  
WDW EM  
SSB 0  
LB 0.30 Hz  
GB 0  
PC 1.00

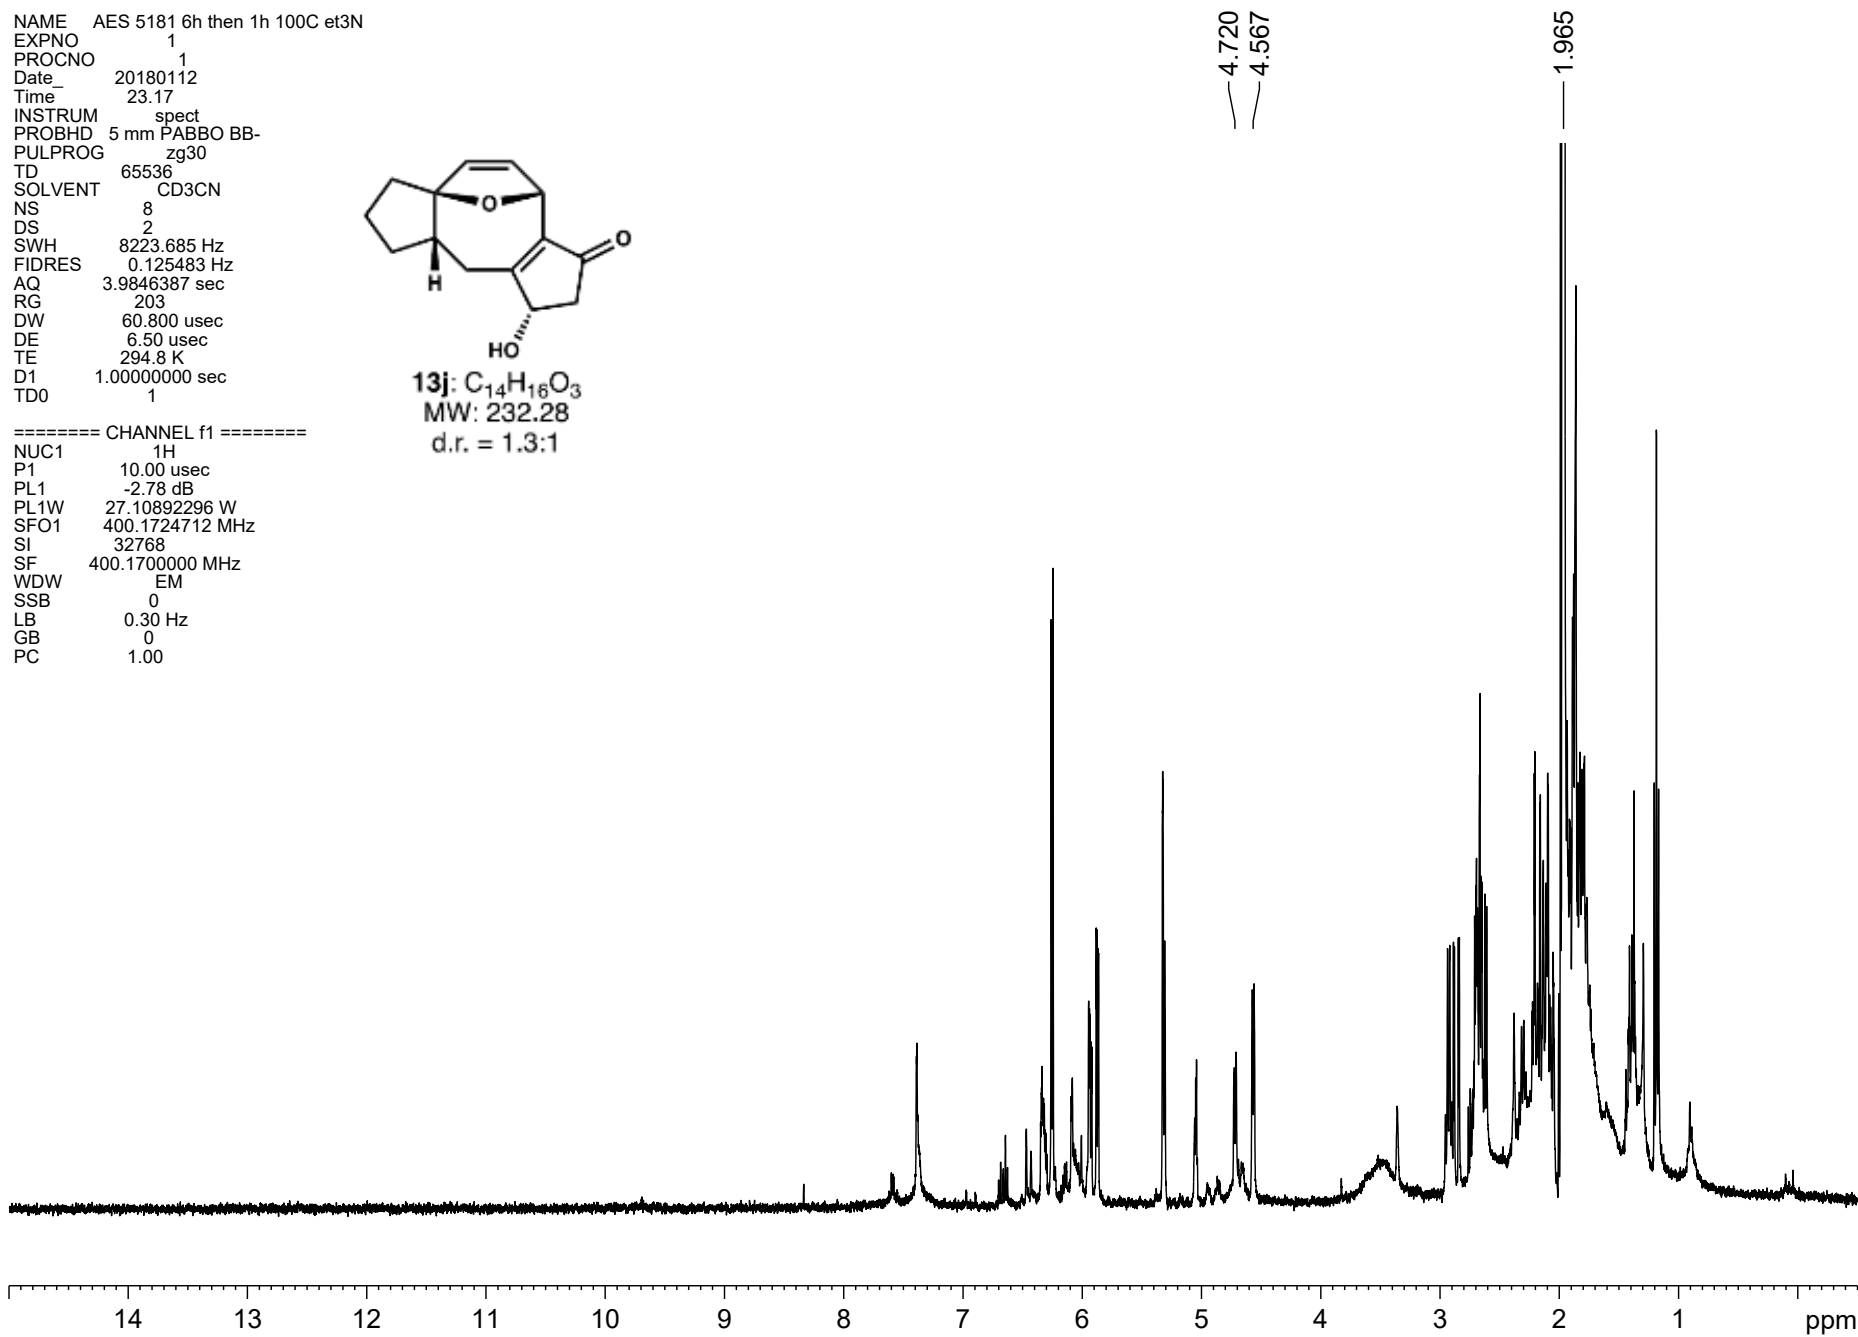

1.00  
1.33

NAME AES 5155c  
 EXPNO 2  
 PROCNO 1  
 Date\_ 20171218  
 Time 16.37  
 INSTRUM spect  
 PROBHD 5 mm PABBO BB-  
 PULPROG zg30  
 TD 65536  
 SOLVENT CDCl3  
 NS 8  
 DS 2  
 SWH 8223.685 Hz  
 FIDRES 0.125483 Hz  
 AQ 3.9846387 sec  
 RG 57  
 DW 60.800 usec  
 DE 6.50 usec  
 TE 294.8 K  
 D1 1.00000000 sec  
 TD0 1

===== CHANNEL f1 =====  
 NUC1 1H  
 P1 10.00 usec  
 PL1 -2.78 dB  
 PL1W 27.10892296 W  
 SFO1 400.1724712 MHz  
 SI 32768  
 SF 400.1700083 MHz  
 WDW EM  
 SSB 0  
 LB 0.30 Hz  
 GB 0  
 PC 1.00

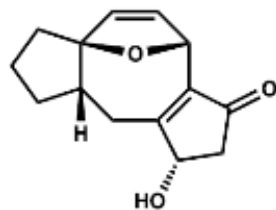

**13j**: C<sub>14</sub>H<sub>16</sub>O<sub>3</sub>  
 MW: 232.28  
 d.r. = 1.3:1

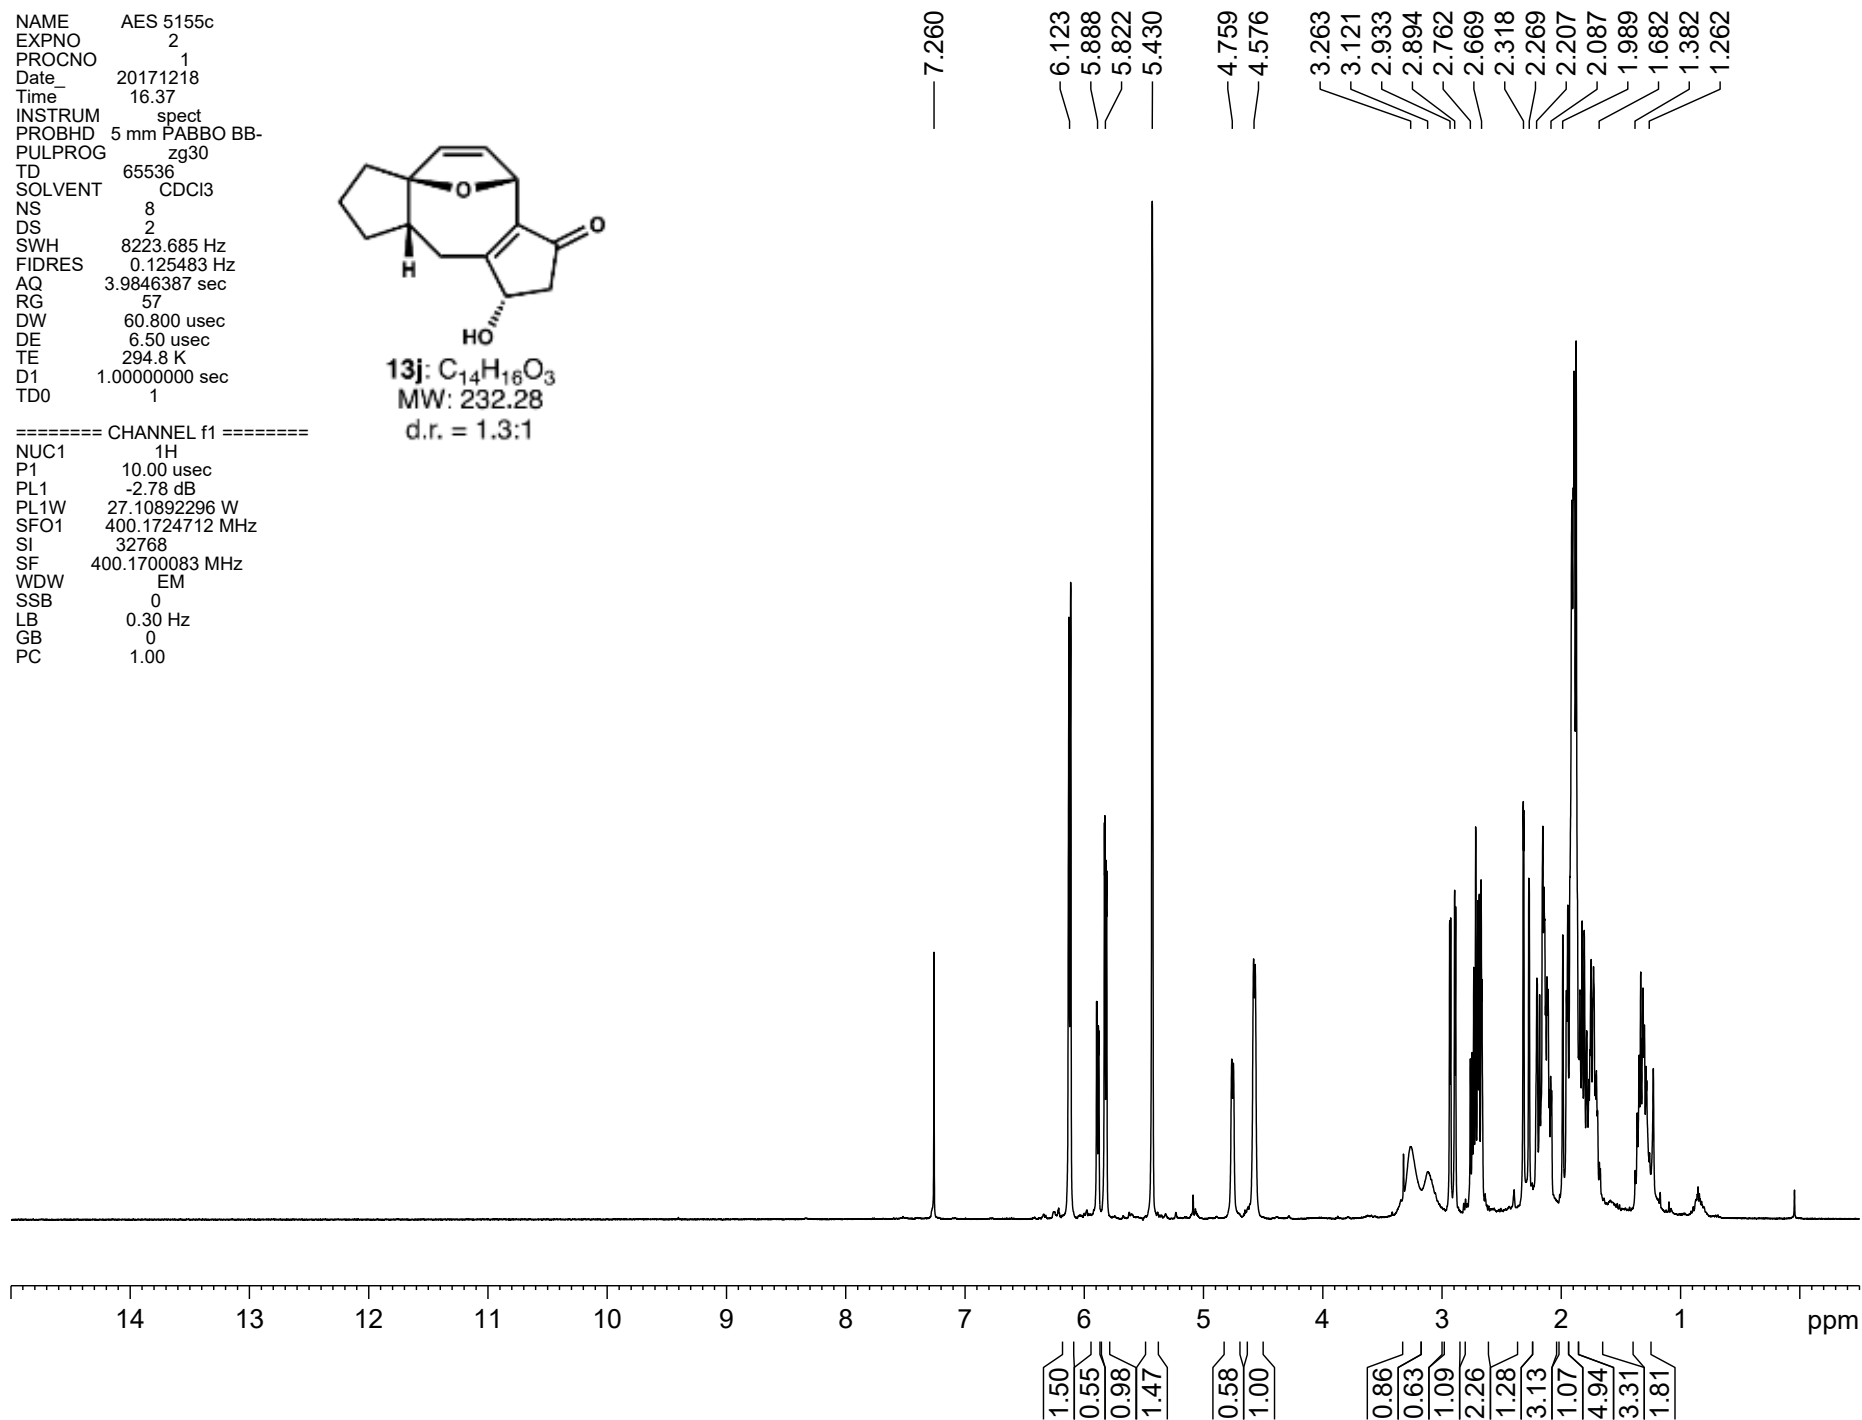

NAME AES5151c C13  
 EXPNO 1  
 PROCNO 1  
 Date\_ 20171216  
 Time 11.25  
 INSTRUM spect  
 PROBHD 5 mm PABBO BB-  
 PULPROG zgpg30  
 TD 65536  
 SOLVENT CDCl3  
 NS 2994  
 DS 4  
 SWH 39062.500 Hz  
 FIDRES 0.596046 Hz  
 AQ 0.8389108 sec  
 RG 203  
 DW 12.800 usec  
 DE 6.50 usec  
 TE 298.3 K  
 D1 2.00000000 sec  
 D11 0.03000000 sec  
 TD0 1

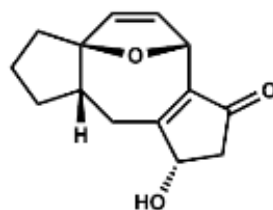

**13j**: C<sub>14</sub>H<sub>16</sub>O<sub>3</sub>  
 MW: 232.28  
 d.r. = 1.3:1

===== CHANNEL f1 =====  
 NUC1 13C  
 P1 9.50 usec  
 PL1 3.00 dB  
 PL1W 59.92485046 W  
 SFO1 150.9178988 MHz

===== CHANNEL f2 =====  
 CPDPRG2 waltz16  
 NUC2 1H  
 PCPD2 80.00 usec  
 PL2 -1.40 dB  
 PL12 14.38 dB  
 PL13 13.70 dB  
 PL2W 16.22728539 W  
 PL12W 0.42879117 W  
 PL13W 0.50147104 W  
 SFO2 600.1324005 MHz  
 SI 32768  
 SF 150.9028090 MHz  
 WDW EM  
 SSB 0  
 LB 1.00 Hz  
 GB 0  
 PC 1.40

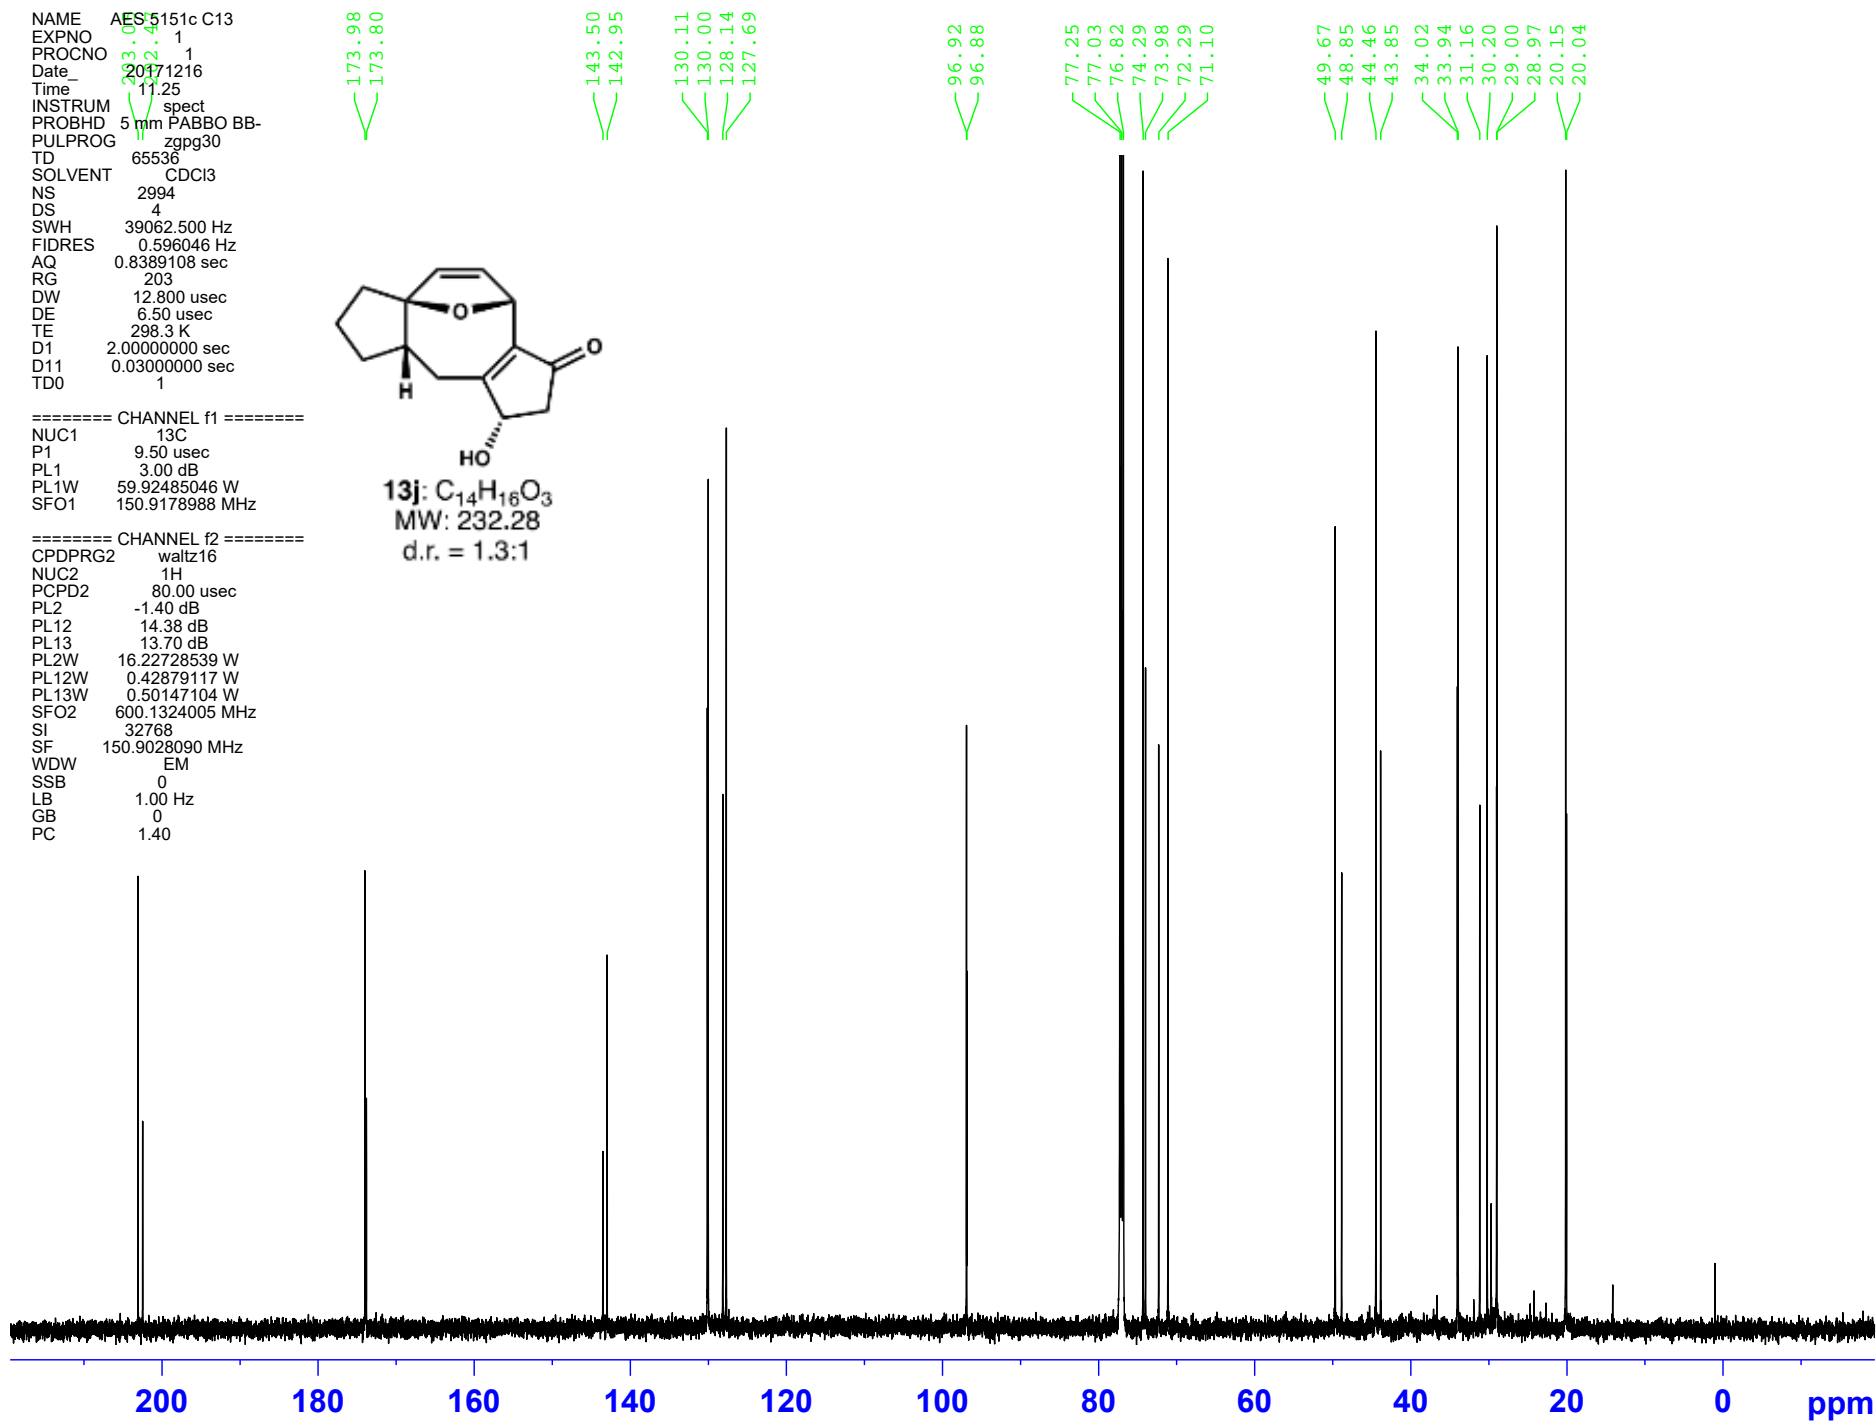

NAME AES 2288 1H  
 EXPNO 1  
 PROCNO 1  
 Date\_ 20160721  
 Time 19.27  
 INSTRUM spect  
 PROBHD 5 mm PABBO BB-  
 PULPROG zg30  
 TD 65536  
 SOLVENT CDCl3  
 NS 16  
 DS 2  
 SWH 12335.526 Hz  
 FIDRES 0.188225 Hz  
 AQ 2.6564426 sec  
 RG 64  
 DW 40.533 usec  
 DE 6.50 usec  
 TE 294.8 K  
 D1 1.00000000 sec  
 TD0 1

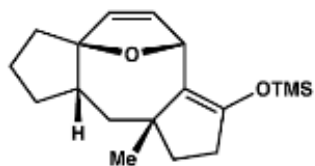

===== CHANNEL f1 =====  
 NUC1 1H  
 P1 14.00 usec  
 PL1 -1.40 dB  
 PL1W 16.22728539 W  
 SFO1 600.1337060 MHz  
 SI 32768  
 SF 600.1300167 MHz  
 WDW EM  
 SSB 0  
 LB 0.30 Hz  
 GB 0  
 PC 1.00

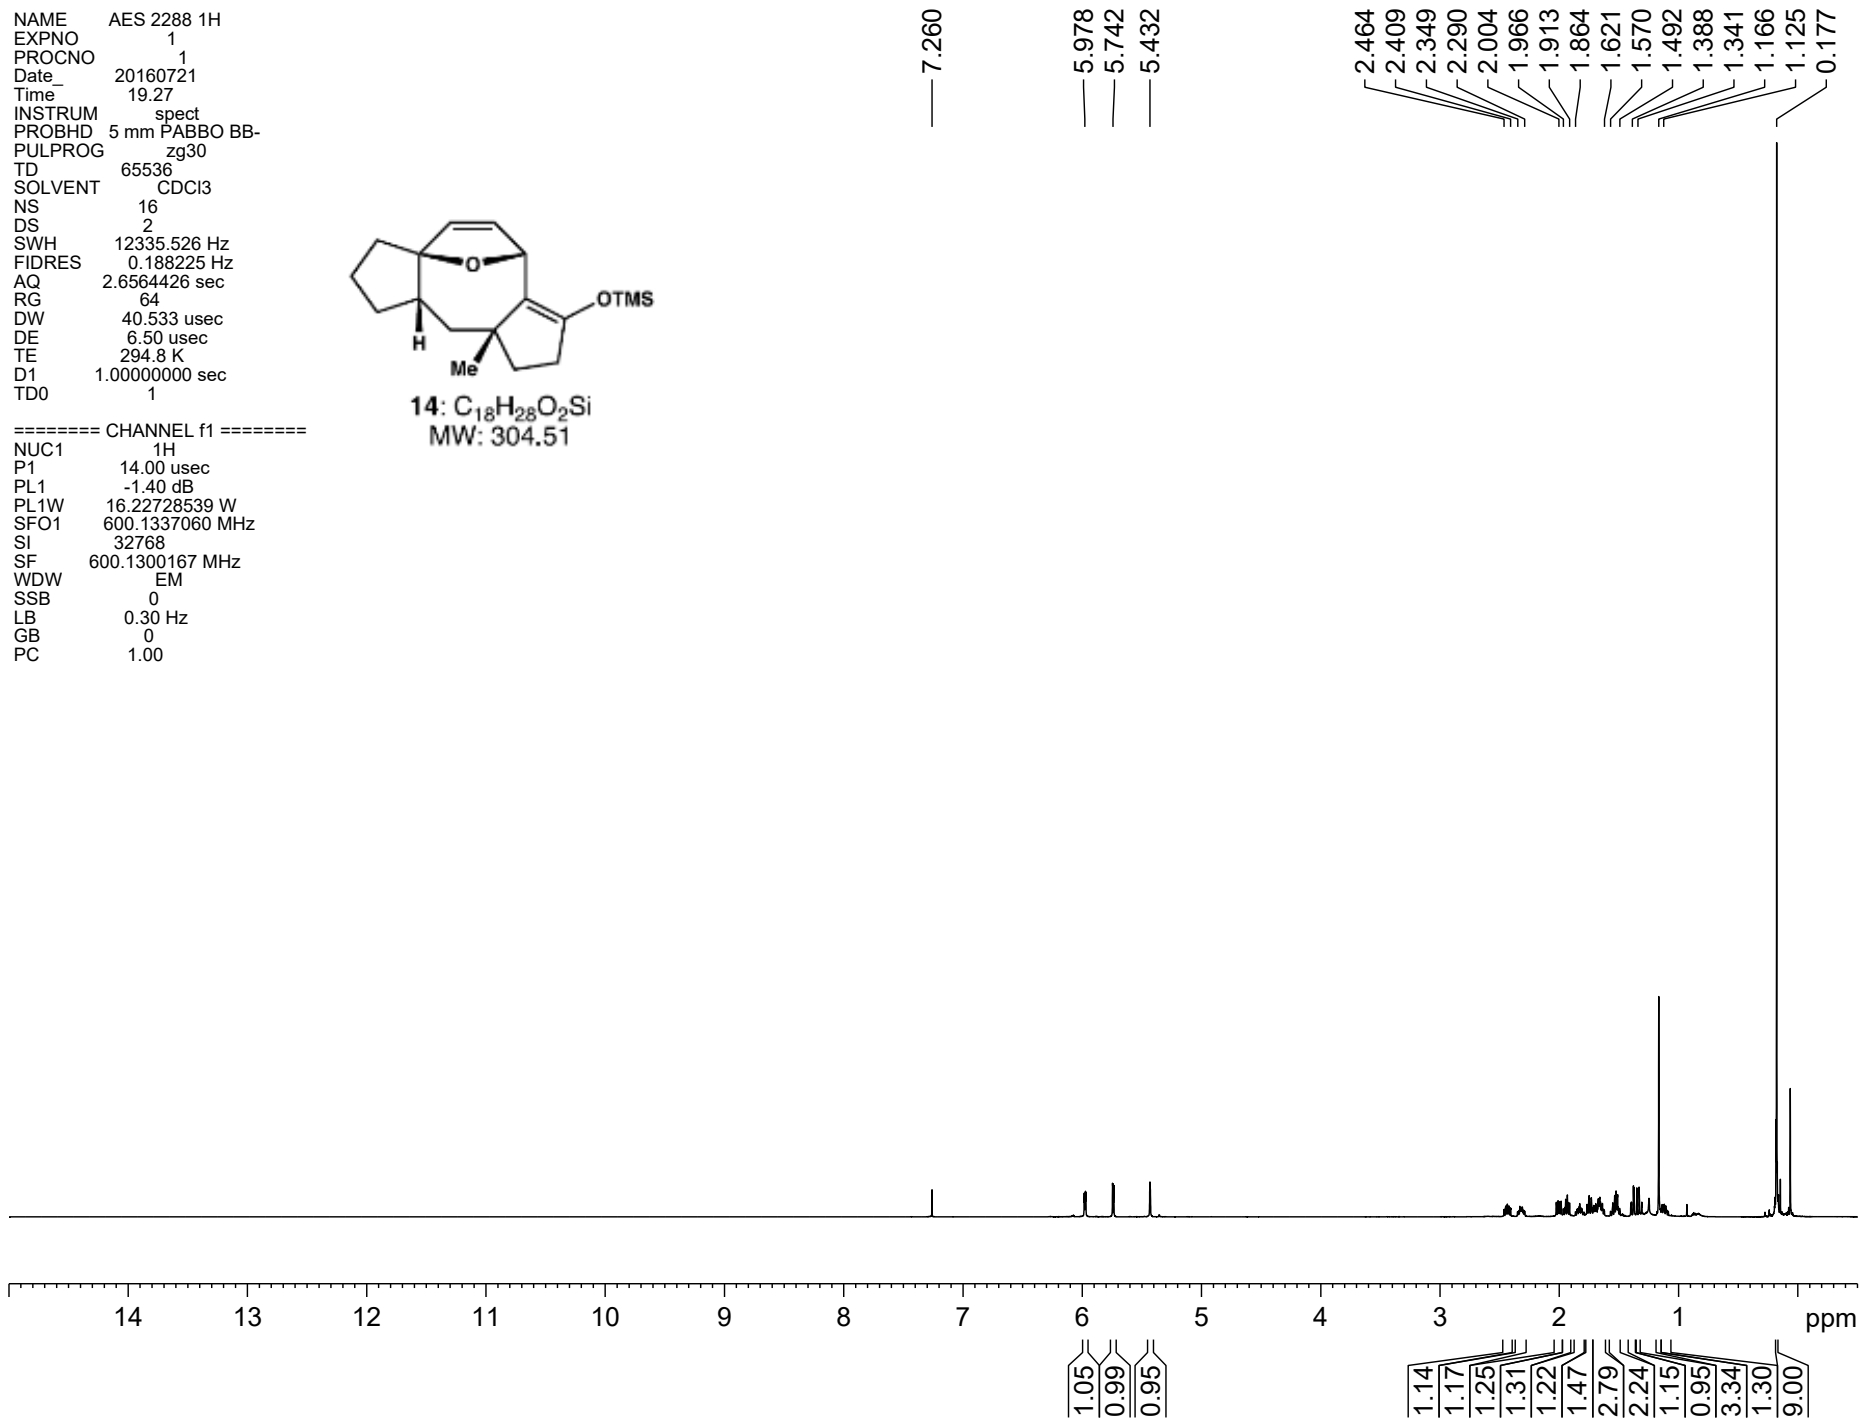

NAME AES 2288 C13  
 EXPNO 1  
 PROCNO 1  
 Date\_ 20160721  
 Time 20.21  
 INSTRUM spect  
 PROBHD 5 mm PABBO BB-  
 PULPROG zgpg30  
 TD 65536  
 SOLVENT CDCl3  
 NS 1024  
 DS 4  
 SWH 39062.500 Hz  
 FIDRES 0.596046 Hz  
 AQ 0.8389108 sec  
 RG 203  
 DW 12.800 usec  
 DE 6.50 usec  
 TE 298.1 K  
 D1 2.00000000 sec  
 D11 0.03000000 sec  
 TD0 1

===== CHANNEL f1 =====  
 NUC1 13C  
 P1 9.50 usec  
 PL1 3.00 dB  
 PL1W 59.92485046 W  
 SFO1 150.9178988 MHz

===== CHANNEL f2 =====  
 CPDPRG2 waltz16  
 NUC2 1H  
 PCPD2 80.00 usec  
 PL2 -1.40 dB  
 PL12 13.74 dB  
 PL13 13.70 dB  
 PL2W 16.22728539 W  
 PL12W 0.49687356 W  
 PL13W 0.50147104 W  
 SFO2 600.1324005 MHz  
 SI 32768  
 SF 150.9028090 MHz  
 WDW EM  
 SSB 0  
 LB 1.00 Hz  
 GB 0  
 PC 1.40

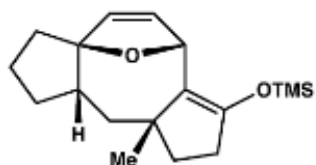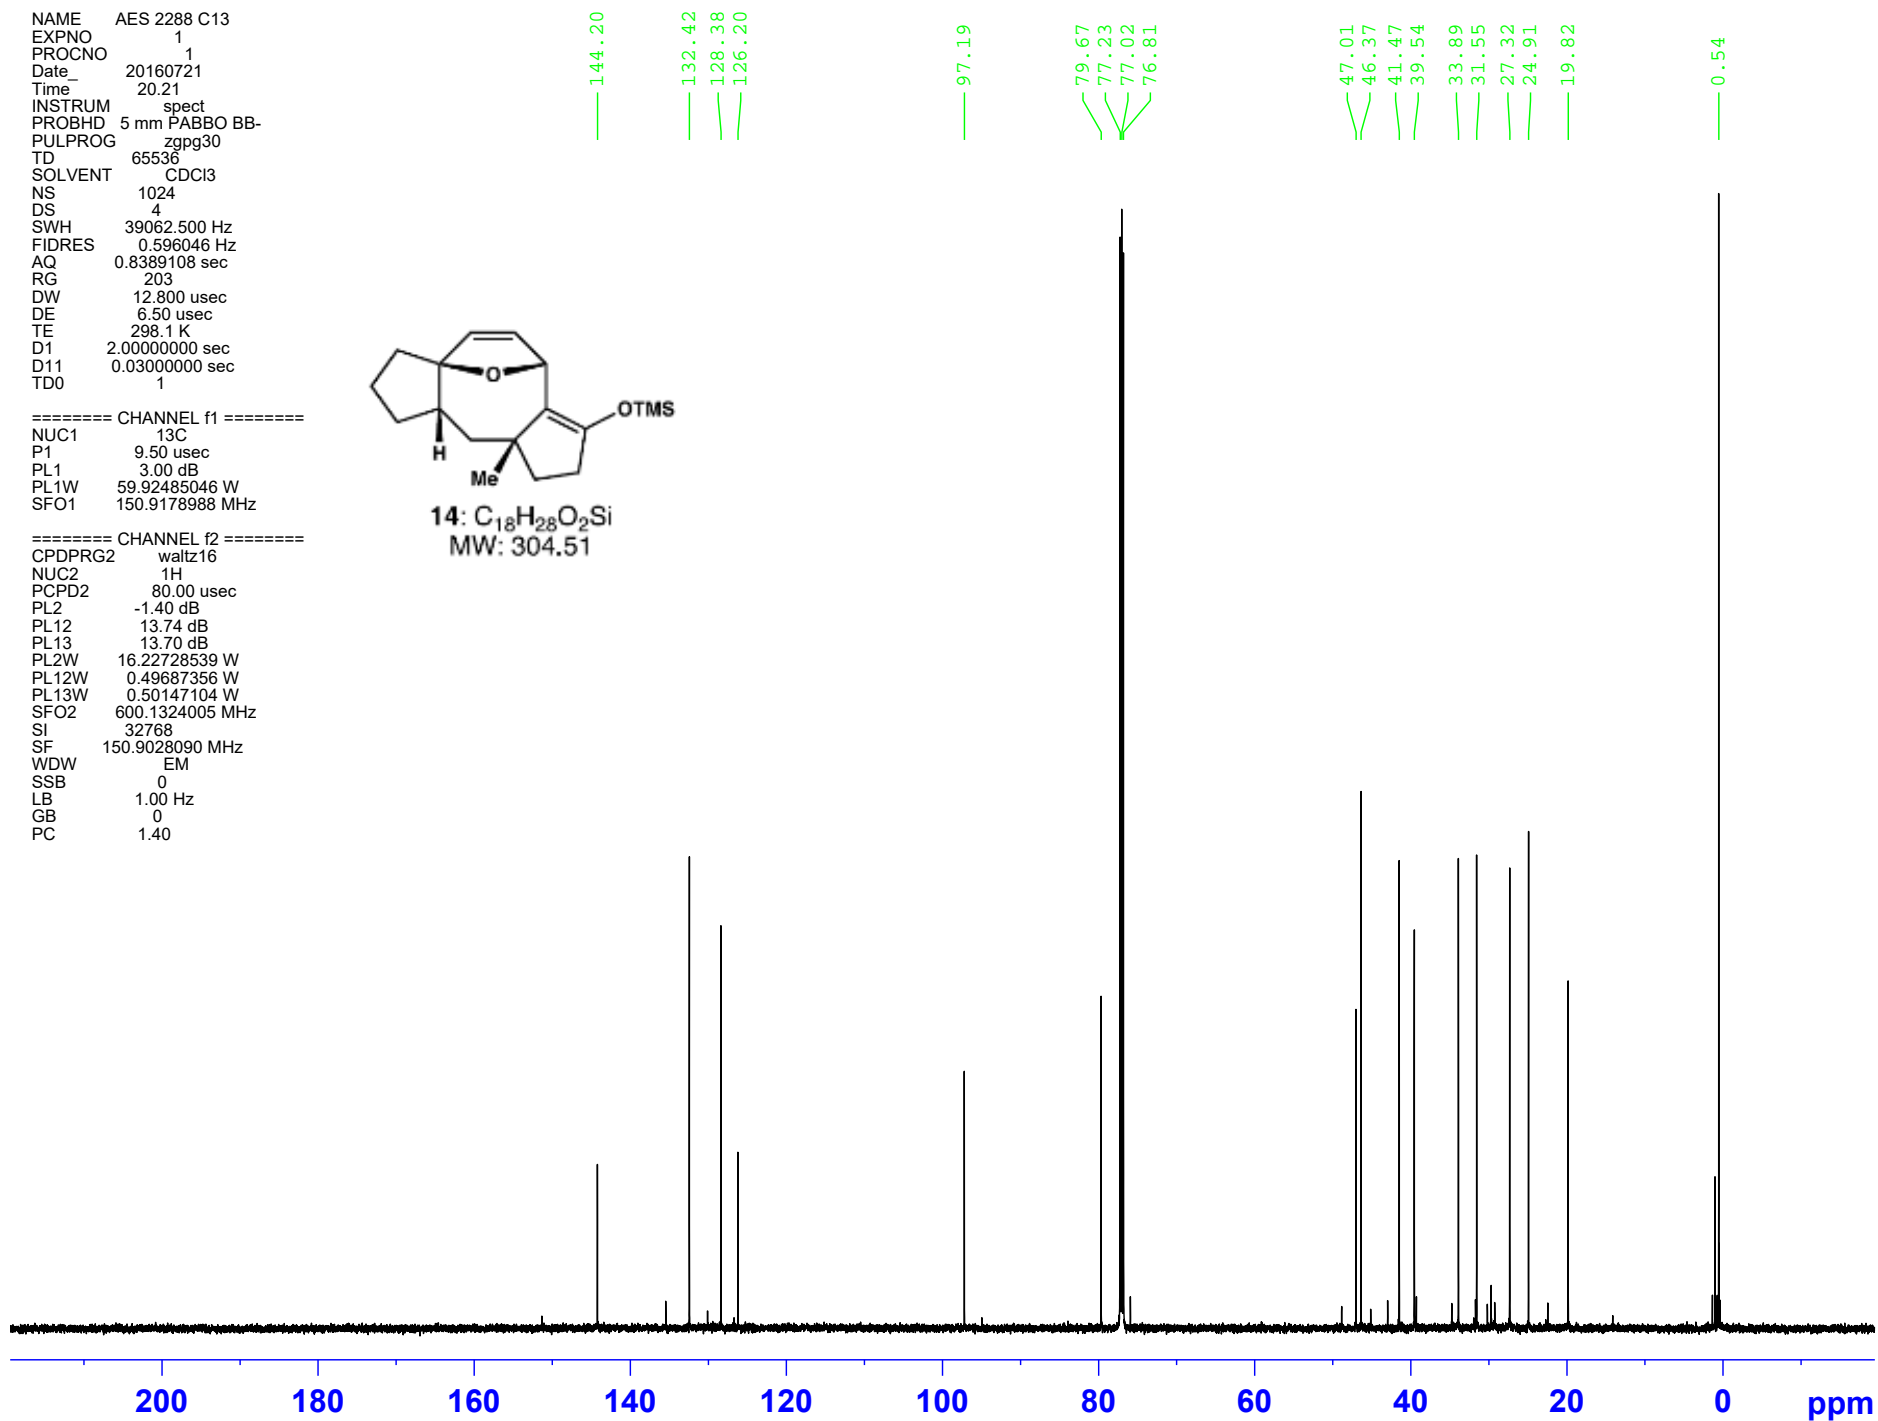

NAME AES 2267 1H  
 EXPNO 1  
 PROCNO 1  
 Date\_ 20160706  
 Time 20.53  
 INSTRUM spect  
 PROBHD 5 mm PABBO BB-  
 PULPROG zg30  
 TD 65536  
 SOLVENT CDCl3  
 NS 16  
 DS 2  
 SWH 12335.526 Hz  
 FIDRES 0.188225 Hz  
 AQ 2.6564426 sec  
 RG 57  
 DW 40.533 usec  
 DE 6.50 usec  
 TE 293.1 K  
 D1 1.00000000 sec  
 TD0 1

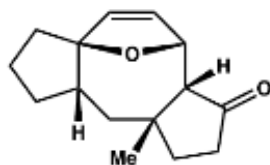

===== CHANNEL f1 =====  
 NUC1 1H  
 P1 14.00 usec  
 PL1 -1.40 dB  
 PL1W 16.22728539 W  
 SFO1 600.1337060 MHz  
 SI 32768  
 SF 600.1300168 MHz  
 WDW EM  
 SSB 0  
 LB 0.30 Hz  
 GB 0  
 PC 1.00

6.197  
 5.825  
 5.130  
 2.696  
 2.393  
 2.334  
 2.233  
 1.925  
 1.829  
 1.774  
 1.708  
 1.655  
 1.599  
 1.385  
 1.275  
 1.097  
 1.026

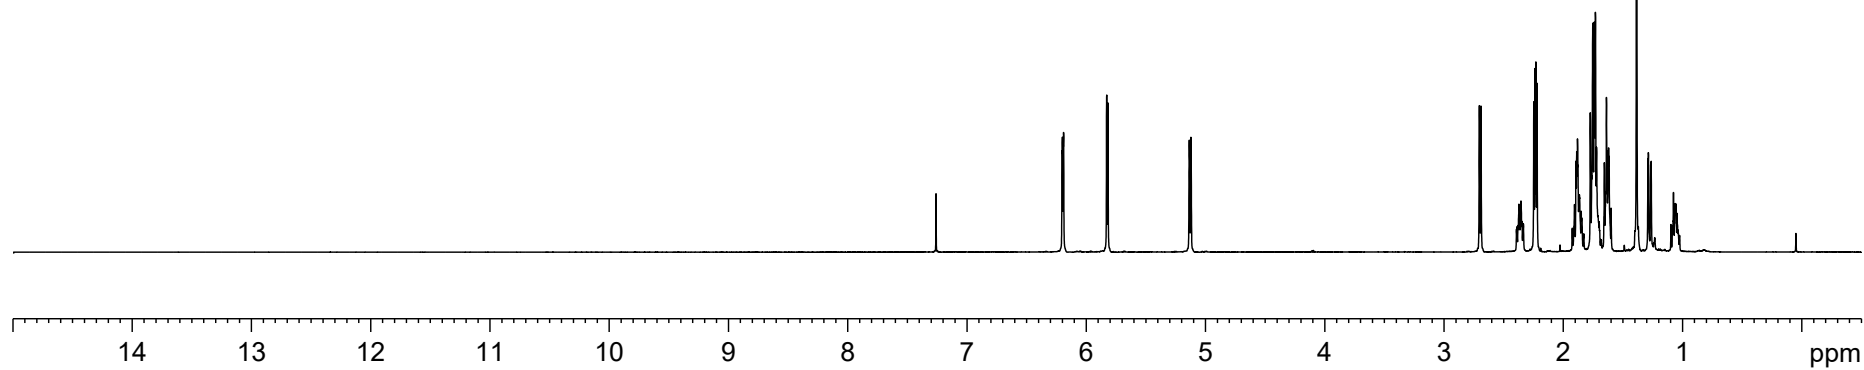

0.92  
 0.94  
 0.93  
 0.93  
 0.99  
 1.96  
 2.04  
 4.26  
 2.05  
 3.00  
 1.03  
 1.02



NAME AES 2267 C13  
 EXPNO 4  
 PROCNO 1  
 Date\_ 20160706  
 Time 23.16  
 INSTRUM spect  
 PROBHD 5 mm PABBO BB-  
 PULPROG zgpg30  
 TD 65536  
 SOLVENT CDCl3  
 NS 1024  
 DS 4  
 SWH 39062.500 Hz  
 FIDRES 0.596046 Hz  
 AQ 0.8389108 sec  
 RG 203  
 DW 12.800 usec  
 DE 6.50 usec  
 TE 296.7 K  
 D1 2.00000000 sec  
 D11 0.03000000 sec  
 TD0 1

===== CHANNEL f1 =====  
 NUC1 13C  
 P1 9.50 usec  
 PL1 3.00 dB  
 PL1W 59.92485046 W  
 SFO1 150.9178988 MHz

===== CHANNEL f2 =====  
 CPDPRG2 waltz16  
 NUC2 1H  
 PCPD2 80.00 usec  
 PL2 -1.40 dB  
 PL12 13.74 dB  
 PL13 13.70 dB  
 PL2W 16.22728539 W  
 PL12W 0.49687356 W  
 PL13W 0.50147104 W  
 SFO2 600.1324005 MHz  
 SI 32768  
 SF 150.9028090 MHz  
 WDW EM  
 SSB 0  
 LB 1.00 Hz  
 GB 0  
 PC 1.40

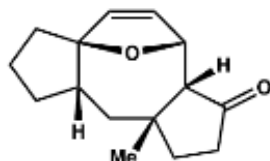

**15:** C<sub>15</sub>H<sub>20</sub>O<sub>2</sub>  
 MW: 232.32

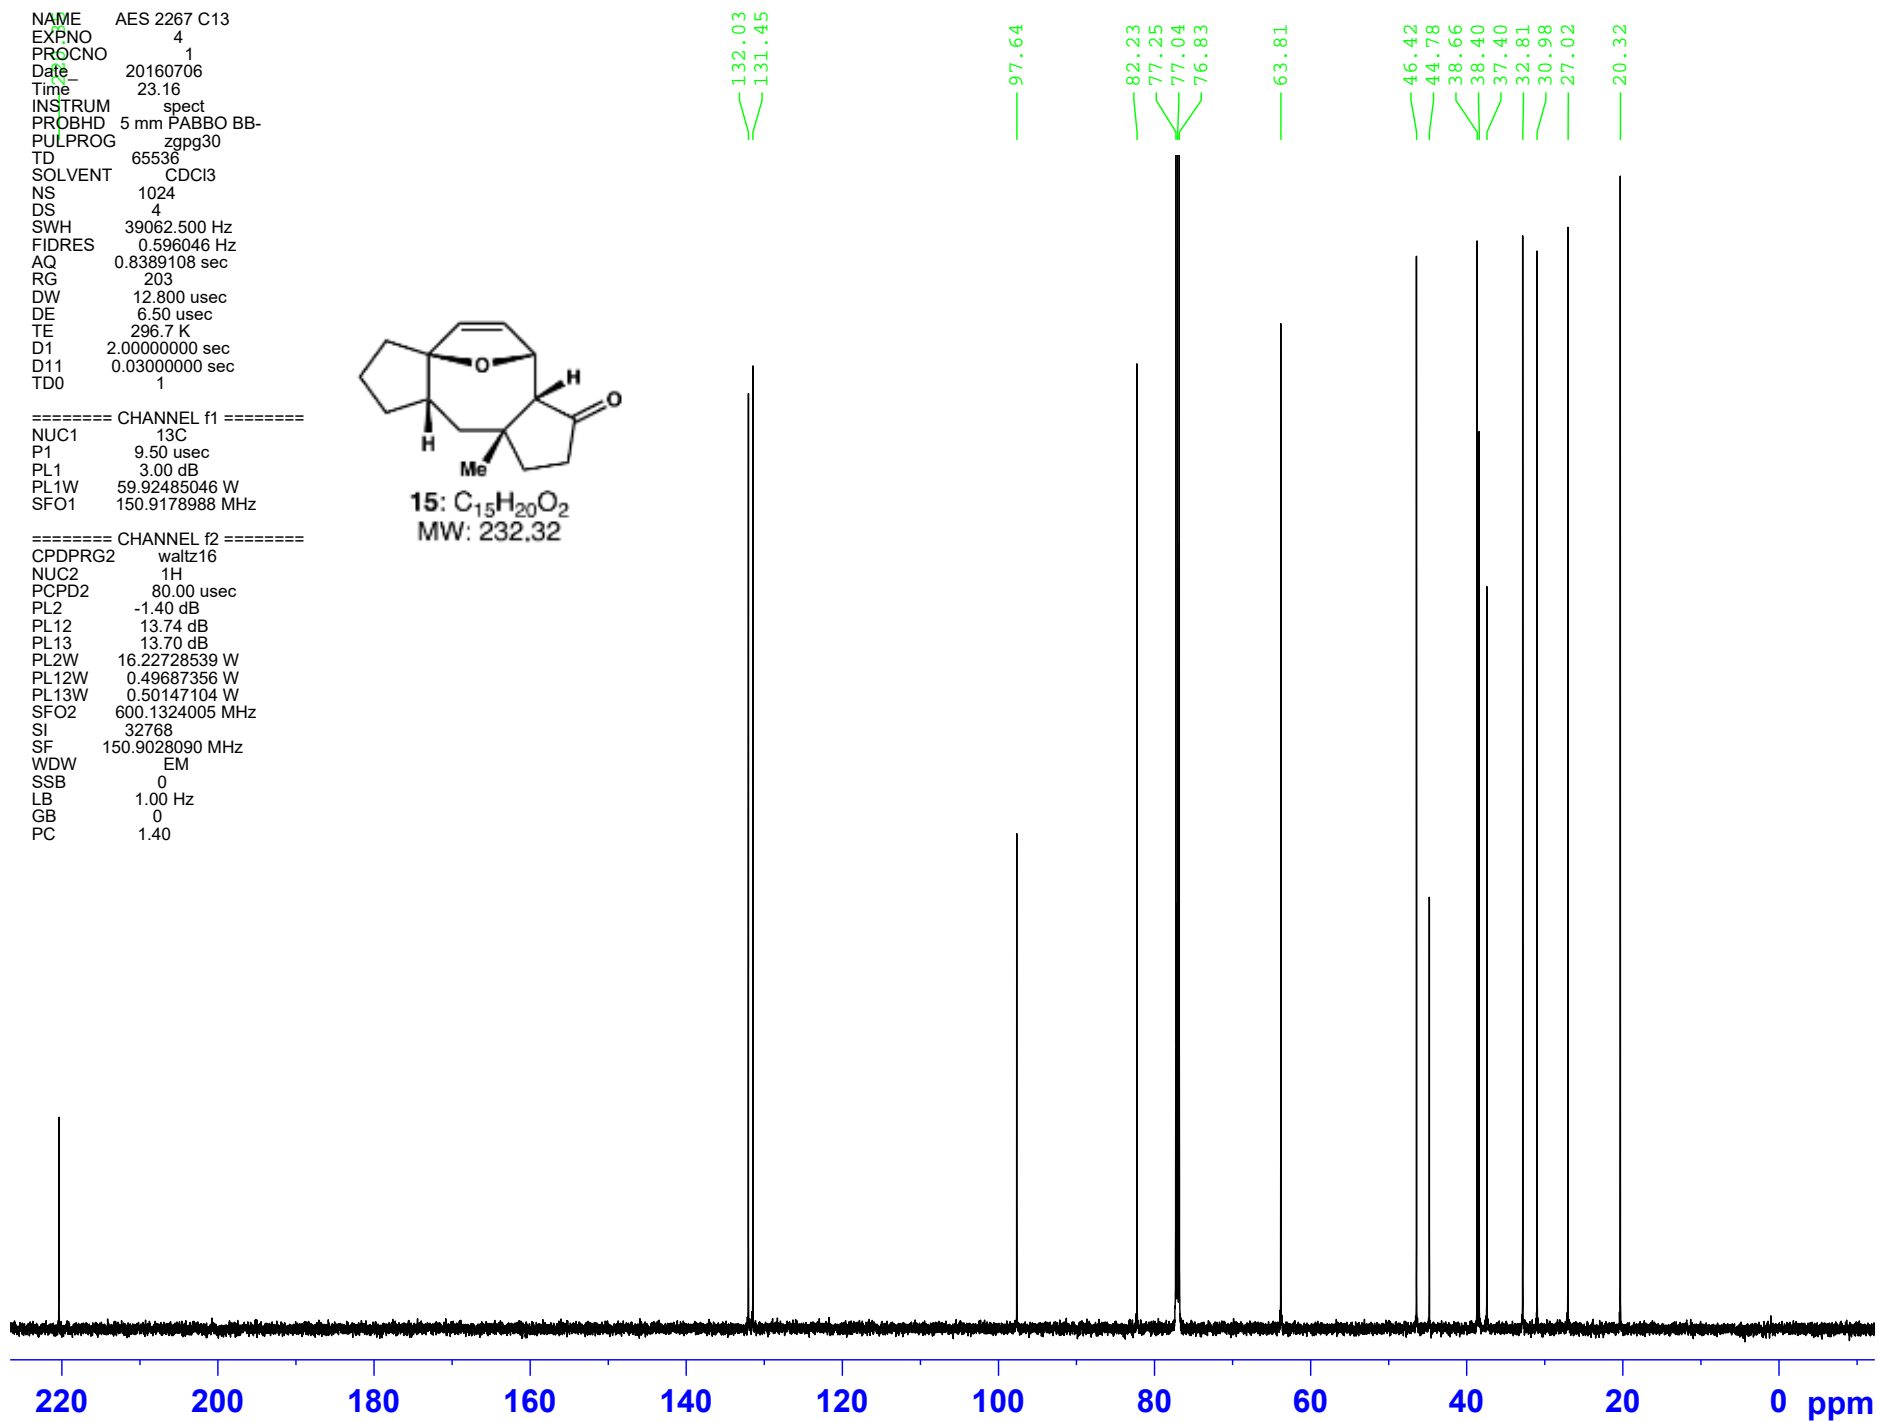

NAME AES 3009 1H  
 EXPNO 1  
 PROCNO 1  
 Date\_ 20160814  
 Time 18.13  
 INSTRUM spect  
 PROBHD 5 mm PABBO BB-  
 PULPROG zg30  
 TD 65536  
 SOLVENT CDCl3  
 NS 16  
 DS 2  
 SWH 12335.526 Hz  
 FIDRES 0.188225 Hz  
 AQ 2.6564426 sec  
 RG 101  
 DW 40.533 usec  
 DE 6.50 usec  
 TE 294.5 K  
 D1 1.00000000 sec  
 TD0 1

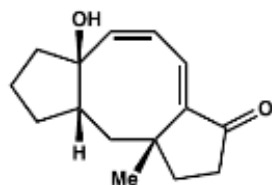

16: C<sub>15</sub>H<sub>20</sub>O<sub>2</sub>  
 MW: 232.32

===== CHANNEL f1 =====  
 NUC1 1H  
 P1 14.00 usec  
 PL1 -1.40 dB  
 PL1W 16.22728539 W  
 SFO1 600.1337060 MHz  
 SI 32768  
 SF 600.1300164 MHz  
 WDW EM  
 SSB 0  
 LB 0.30 Hz  
 GB 0  
 PC 1.00

7.260  
 6.556  
 6.058  
 5.909

2.522  
 2.454  
 2.448  
 2.391  
 2.234  
 2.057  
 1.901  
 1.804  
 1.757  
 1.651  
 1.548  
 1.280  
 1.270  
 1.199

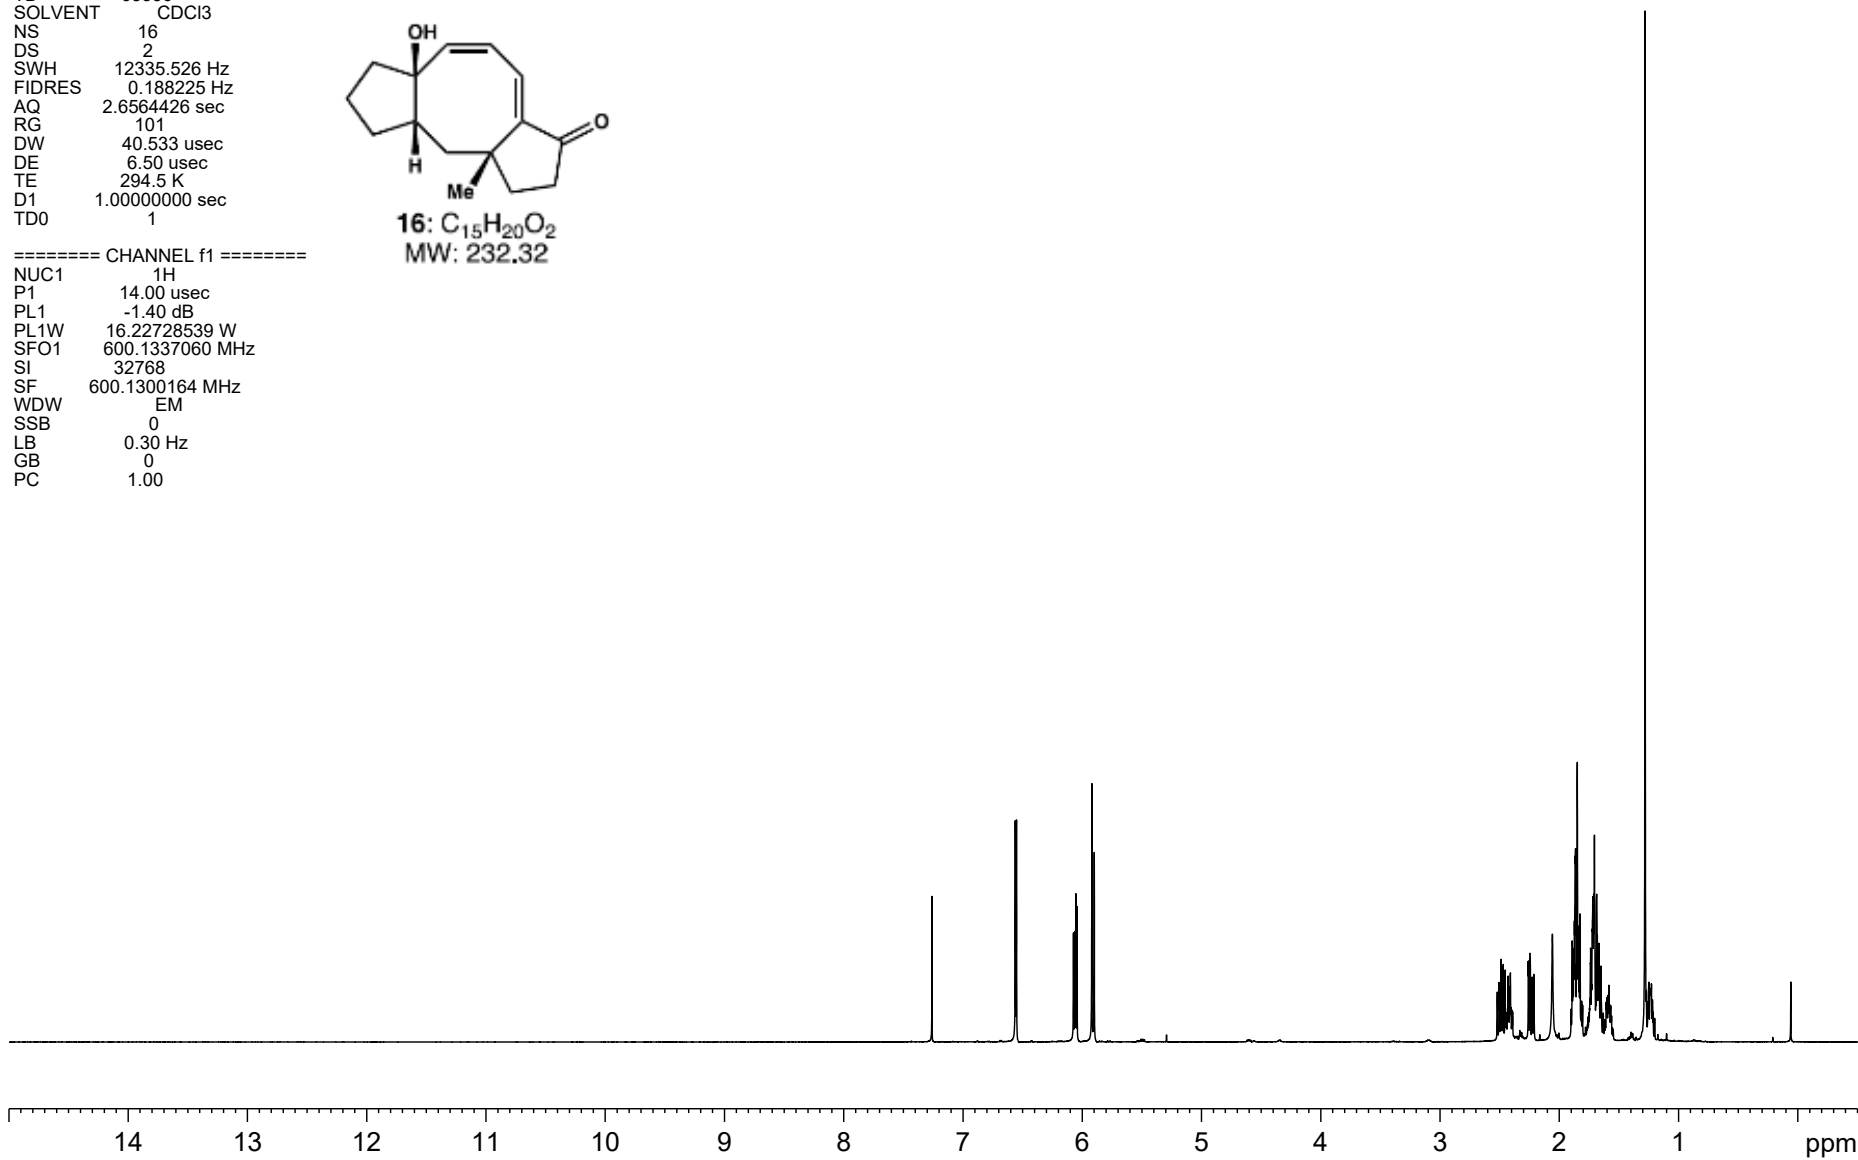

0.92  
 1.00  
 1.02

1.15  
 1.11  
 1.09  
 1.02  
 4.33  
 4.53  
 1.17  
 3.21  
 1.24

NAME AES 3009 C13  
 EXPNO 1  
 PROCNO 1  
 Date\_ 20160814  
 Time\_ 19.09  
 INSTRUM spect  
 PROBHD 5 mm PABBO BB-  
 PULPROG zgpg30  
 TD 65536  
 SOLVENT CDCl3  
 NS 1024  
 DS 4  
 SWH 36057.691 Hz  
 FIDRES 0.550197 Hz  
 AQ 0.9088159 sec  
 RG 203  
 DW 13.867 usec  
 DE 6.50 usec  
 TE 298.7 K  
 D1 2.00000000 sec  
 D11 0.03000000 sec  
 TD0 1

===== CHANNEL f1 =====  
 NUC1 13C  
 P1 9.50 usec  
 PL1 3.00 dB  
 PL1W 59.92485046 W  
 SFO1 150.9178988 MHz

===== CHANNEL f2 =====  
 CPDPRG2 waltz16  
 NUC2 1H  
 PCPD2 80.00 usec  
 PL2 -1.40 dB  
 PL12 13.74 dB  
 PL13 13.70 dB  
 PL2W 16.22728539 W  
 PL12W 0.49687356 W  
 PL13W 0.50147104 W  
 SFO2 600.1324005 MHz  
 SI 32768  
 SF 150.9028090 MHz  
 WDW EM  
 SSB 0  
 LB 1.00 Hz  
 GB 0  
 PC 1.40

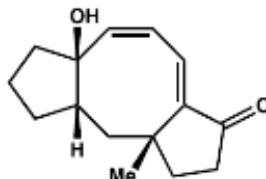

**16: C<sub>15</sub>H<sub>20</sub>O<sub>2</sub>**  
**MW: 232.32**

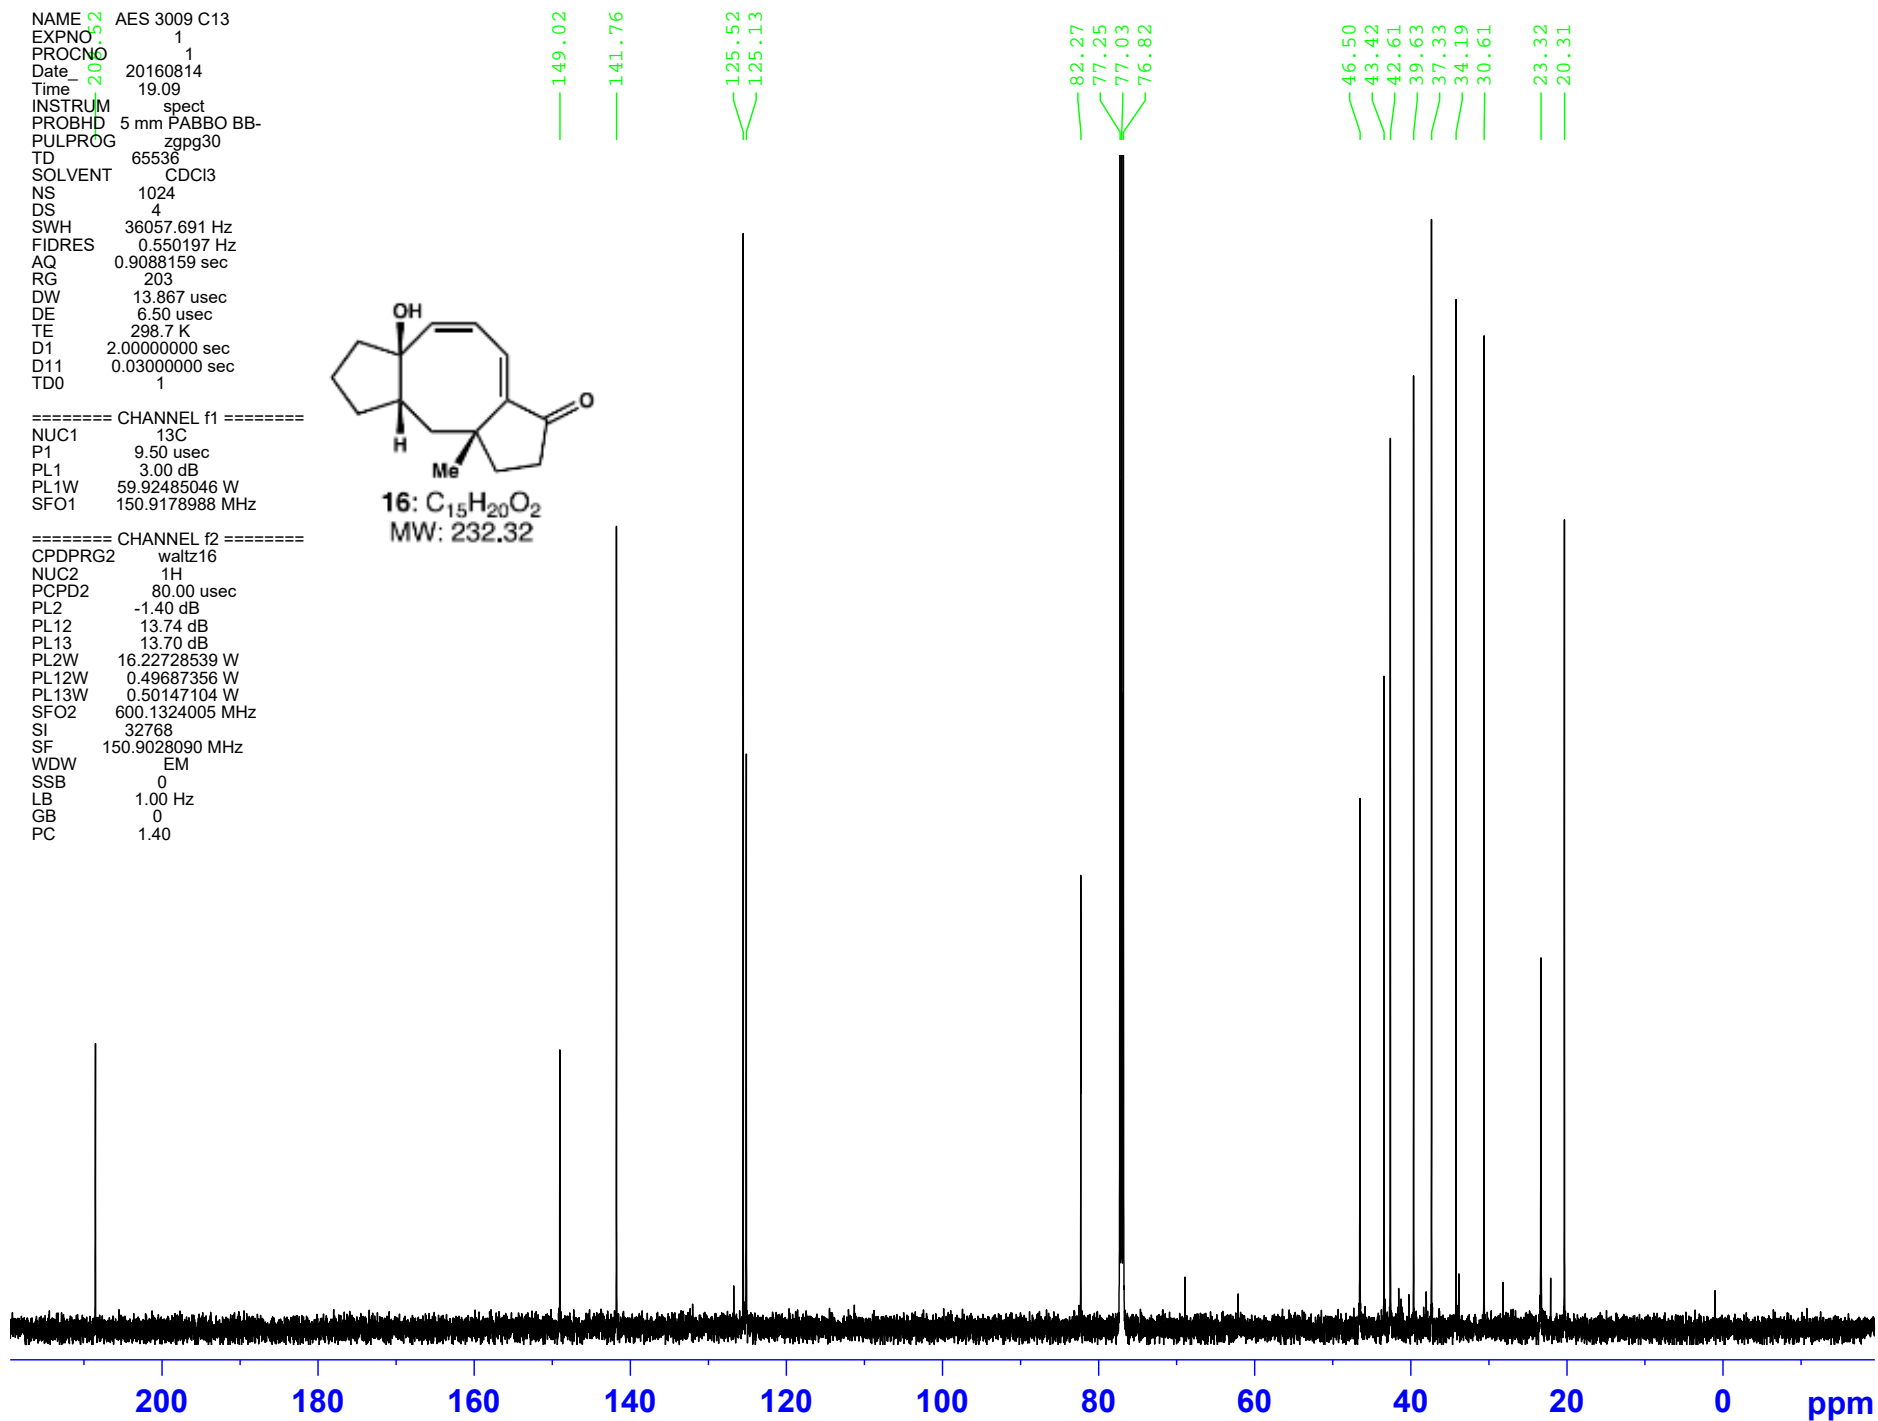

NAME JAL3209ij crude 1H  
EXPNO 1  
PROCNO 1  
Date\_ 20180103  
Time 14.48  
INSTRUM spect  
PROBHD 5 mm PABBO BB-  
PULPROG zg30  
TD 65536  
SOLVENT C6D6  
NS 8  
DS 2  
SWH 8223.685 Hz  
FIDRES 0.125483 Hz  
AQ 3.9846387 sec  
RG 203  
DW 60.800 usec  
DE 6.50 usec  
TE 294.3 K  
D1 1.00000000 sec  
TD0 1

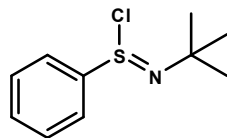

===== CHANNEL f1 =====  
NUC1 1H  
P1 10.00 usec  
PL1 -2.78 dB  
PL1W 27.10892296 W  
SFO1 400.1724712 MHz  
SI 32768  
SF 400.1700001 MHz  
WDW EM  
SSB 0  
LB 0.30 Hz  
GB 0  
PC 1.00

7.921  
7.886  
7.150  
6.943  
6.906

1.377

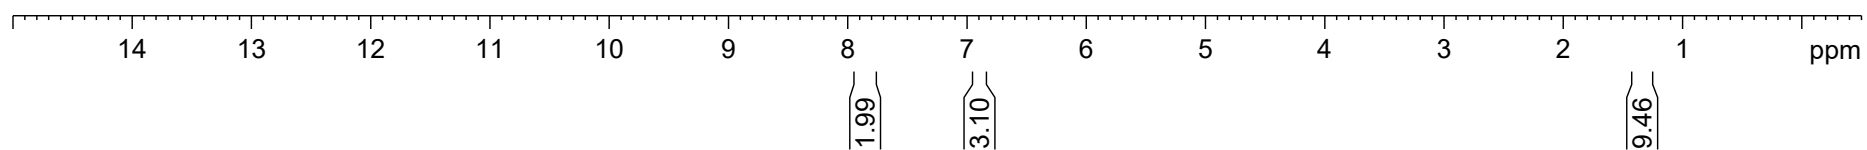

Supplement: SC-009-C8SC00999F-s001.pdf [file SC-009-C8SC00999F-s001.pdf]
